# Supplementary material for: Sequentiality of beetle communities in the longitudinal gradient of a lowland river in the context of the river continuum concept
Source: PeerJ. 2022 Apr 5;10:e13232. doi: 10.7717/peerj.13232 (PMC8992647; doi:10.7717/peerj.13232)
Supplement: Supplemental Information 3 [file peerj-10-13232-s003.xlsx]

## Sheet: Database
sample symbol	habitat	mesohabitat	sample	type of habitat	Additional description	type of water	yearr	month	day	species	element	Larvae	Imagines	total	the degree of growth by macrophytes	O2	pH	temp.	cond.	NH4	NO3	PO3	Fe	water turbidity	Water hardness	BZT5	V	insolation %	4mm	3,15mm	2,5mm	0,4mm	0,3mm	0,1mm	0,056mm	<0,056mm	organic matter %	mineral matter %	M	W	area from the sources	from the sources (%)	catchment area	catchment area (%)	Forests	Forests %	grasslands	grasslands %	agricultural lands
K02/1/A	K2	K2/1	A	river current	stones	river	2008	4	15	11.01. Hydraena palustris	sa	-	1	1	0	10.2	6.3	7.6	241	0.3	0.2	0.9	0.04	42	140	4.1	0.5472	35	72.9289	3.64111	2.86348	15.2438	3.09649	2.05216	0.160018	0.0140367	5.12658	94.8734	0.44	0.53	1263.3	2.08574	793.9	1.31075	247.06	31.1198	292.94	36.8989	228.7
K02/1/A	K2	K2/1	A	river current	stones	river	2008	6	2	11.01. Hydraena palustris	sa	-	1	1	0	8.9	6.75	16.8	123	0.5	5.3	0.6	0.24	5.7	126	4.9	0.3972	4.10714	66.1495	3.58731	2.32977	17.9657	3.31462	6.2083	0.235624	0.20915	0.682446	99.3176	0.44	0.593636	1263.3	2.08574	793.9	1.31075	247.06	31.1198	292.94	36.8989	228.7
K02/1/A	K2	K2/1	A	river current	stones	river	2008	7	7	11.01. Hydraena palustris	sa	-	2	2	0	5.4	7.5	15.7	159	0.2	1.6	0.2	0.12	19.4	268	5.3	0.3258	0.494505	66.755	3.59792	2.59644	17.6717	2.84019	6.17582	0.246397	0.116575	0.682446	99.3176	0.44	0.593636	1263.3	2.08574	793.9	1.31075	247.06	31.1198	292.94	36.8989	228.7
K02/1/A	K2	K2/1	A	river current	stones	river	2008	8	5	05.02. Ilybius fuliginosus	re	-	1	1	0	7.5	7.64	16.1	202	1.4	2.2	0.9	0.15	12.1	158	5.6	0.2963	0.384932	68.3141	3.1369	3.01441	16.7071	2.66024	5.78383	0.234335	0.149123	0.387635	99.6124	0.44	0.593636	1263.3	2.08574	793.9	1.31075	247.06	31.1198	292.94	36.8989	228.7
K02/1/A	K2	K2/1	A	river current	stones	river	2008	8	5	11.01. Hydraena palustris	sa	-	9	9	0	7.5	7.64	16.1	202	1.4	2.2	0.9	0.15	12.1	158	5.6	0.2963	0.384932	68.3141	3.1369	3.01441	16.7071	2.66024	5.78383	0.234335	0.149123	0.387635	99.6124	0.44	0.593636	1263.3	2.08574	793.9	1.31075	247.06	31.1198	292.94	36.8989	228.7
K02/1/A	K2	K2/1	A	river current	stones	river	2008	9	10	11.01. Hydraena palustris	sa	-	5	5	0	1.5	6.32	16.4	205	0.3	2.6	0.4	0.11	78	143	4.3	0.2876	3.52459	42.5825	5.53849	2.3205	18.84	8.18535	21.2253	1.09426	0.213573	0.387635	99.6124	0.14	0.93803	1263.3	2.08574	793.9	1.31075	247.06	31.1198	292.94	36.8989	228.7
K02/1/B	K2	K2/1	B	river current	stones	river	2008	7	7	11.01. Hydraena palustris	sa	-	2	2	0	5.4	7.5	15.7	159	0.2	1.6	0.2	0.12	19.4	268	5.3	0.3258	0.494505	66.755	3.59792	2.59644	17.6717	2.84019	6.17582	0.246397	0.116575	0.682446	99.3176	0.44	0.593636	1263.3	2.08574	793.9	1.31075	247.06	31.1198	292.94	36.8989	228.7
K02/1/B	K2	K2/1	B	river current	river current sand, stones	river	2008	8	5	11.01. Hydraena palustris	sa	-	11	11	0	7.5	7.64	16.1	202	1.4	2.2	0.9	0.15	12.1	158	5.6	0.2963	0.384932	68.3141	3.1369	3.01441	16.7071	2.66024	5.78383	0.234335	0.149123	0.387635	99.6124	0.44	0.593636	1263.3	2.08574	793.9	1.31075	247.06	31.1198	292.94	36.8989	228.7
K02/1/B	K2	K2/1	B	river current	river current sand, stones	river	2008	8	5	12.05. Oulimnius tuberculatus	rb	1	-	1	0	7.5	7.64	16.1	202	1.4	2.2	0.9	0.15	12.1	158	5.6	0.2963	0.384932	68.3141	3.1369	3.01441	16.7071	2.66024	5.78383	0.234335	0.149123	0.387635	99.6124	0.44	0.593636	1263.3	2.08574	793.9	1.31075	247.06	31.1198	292.94	36.8989	228.7
K02/1/B	K2	K2/1	B	river current	stones	river	2008	9	10	11.01. Hydraena palustris	sa	-	4	4	0	1.5	6.32	16.4	205	0.3	2.6	0.4	0.11	78	143	4.3	0.2876	3.52459	42.5825	5.53849	2.3205	18.84	8.18535	21.2253	1.09426	0.213573	0.387635	99.6124	0.14	0.93803	1263.3	2.08574	793.9	1.31075	247.06	31.1198	292.94	36.8989	228.7
K02/1/B	K2	K2/1	B	river current	stones	river	2008	10	13	02.02. Haliplus fluviatilis	re	-	1	1	0	8.5	7.59	10.9	112.2	0.1	1.3	0.2	0	18.4	41	7.5	0.3012	7.09677	40.2637	4.57987	2.18224	15.5585	8.06971	27.4727	1.49906	0.374222	0.602231	99.3978	0.14	0.93803	1263.3	2.08574	793.9	1.31075	247.06	31.1198	292.94	36.8989	228.7
K02/1/B	K2	K2/1	B	river current	stones	river	2008	10	13	11.01. Hydraena palustris	sa	-	1	1	0	8.5	7.59	10.9	112.2	0.1	1.3	0.2	0	18.4	41	7.5	0.3012	7.09677	40.2637	4.57987	2.18224	15.5585	8.06971	27.4727	1.49906	0.374222	0.602231	99.3978	0.14	0.93803	1263.3	2.08574	793.9	1.31075	247.06	31.1198	292.94	36.8989	228.7
K02/1/B	K2	K2/1	B	river current	stones	river	2008	10	13	14.06. Scirtes sp.	sb	3	-	3	0	8.5	7.59	10.9	112.2	0.1	1.3	0.2	0	18.4	41	7.5	0.3012	7.09677	40.2637	4.57987	2.18224	15.5585	8.06971	27.4727	1.49906	0.374222	0.602231	99.3978	0.14	0.93803	1263.3	2.08574	793.9	1.31075	247.06	31.1198	292.94	36.8989	228.7
K02/1/C	K2	K2/1	C	river current	stones	river	2008	4	14	11.01. Hydraena palustris	sa	-	1	1	0	10.2	6.3	7.6	241	0.3	0.2	0.9	0.04	42	140	4.1	0.5472	35	72.9289	3.64111	2.86348	15.2438	3.09649	2.05216	0.160018	0.0140367	5.12658	94.8734	0.44	0.53	1263.3	2.08574	793.9	1.31075	247.06	31.1198	292.94	36.8989	228.7
K02/1/C	K2	K2/1	C	river current	stones	river	2008	8	5	11.01. Hydraena palustris	sa	-	8	8	0	7.5	7.64	16.1	202	1.4	2.2	0.9	0.15	12.1	158	5.6	0.2963	0.384932	68.3141	3.1369	3.01441	16.7071	2.66024	5.78383	0.234335	0.149123	0.387635	99.6124	0.44	0.593636	1263.3	2.08574	793.9	1.31075	247.06	31.1198	292.94	36.8989	228.7
K02/1/C	K2	K2/1	C	river current	stones	river	2008	9	10	11.01. Hydraena palustris	sa	-	7	7	0	1.5	6.32	16.4	205	0.3	2.6	0.4	0.11	78	143	4.3	0.2876	3.52459	42.5825	5.53849	2.3205	18.84	8.18535	21.2253	1.09426	0.213573	0.387635	99.6124	0.14	0.93803	1263.3	2.08574	793.9	1.31075	247.06	31.1198	292.94	36.8989	228.7
K02/2/A	K2	K2/2	A	river pocket water	river pocket water	river	2008	7	7	05.01. Agabus bipustulatus	sb	-	1	1	0	5.4	7.5	15.7	159	0.2	1.6	0.2	0.12	19.4	268	5.3	0.0071	51.6484	1.05387	1.28192	2.35652	33.8309	16.9552	43.8513	0.435369	0.234961	0.366716	99.6333	1.24667	1.86303	1263.3	2.08574	793.9	1.31075	247.06	31.1198	292.94	36.8989	228.7
K02/2/A	K2	K2/2	A	river pocket water	river pocket water	river	2008	7	7	05.16. Hydroporus rufifrons	sa	-	1	1	0	5.4	7.5	15.7	159	0.2	1.6	0.2	0.12	19.4	268	5.3	0.0071	51.6484	1.05387	1.28192	2.35652	33.8309	16.9552	43.8513	0.435369	0.234961	0.366716	99.6333	1.24667	1.86303	1263.3	2.08574	793.9	1.31075	247.06	31.1198	292.94	36.8989	228.7
K02/2/A	K2	K2/2	A	river pocket water	river pocket water	river	2008	9	5	01.02. Gyrinus substriatus	sb	-	9	9	0	1.5	6.32	16.4	205	0.3	2.6	0.4	0.11	78	143	4.2	0.0075	5.4918	3.53073	0.3817	0.545286	12.9069	5.99269	42.6277	21.5333	12.4816	2.54997	97.45	2.93333	1.67667	1263.3	2.08574	793.9	1.31075	247.06	31.1198	292.94	36.8989	228.7
K02/2/A	K2	K2/2	A	river pocket water	river pocket water	river	2008	9	5	05.02. Ilybius fuliginosus	re	-	2	2	0	1.5	6.32	16.4	205	0.3	2.6	0.4	0.11	78	143	4.2	0.0075	5.4918	3.53073	0.3817	0.545286	12.9069	5.99269	42.6277	21.5333	12.4816	2.54997	97.45	2.93333	1.67667	1263.3	2.08574	793.9	1.31075	247.06	31.1198	292.94	36.8989	228.7
K02/2/A	K2	K2/2	A	river pocket water	river pocket water	river	2008	9	5	10.01. Anacaena limbata	sb	-	1	1	0	1.5	6.32	16.4	205	0.3	2.6	0.4	0.11	78	143	4.2	0.0075	5.4918	3.53073	0.3817	0.545286	12.9069	5.99269	42.6277	21.5333	12.4816	2.54997	97.45	2.93333	1.67667	1263.3	2.08574	793.9	1.31075	247.06	31.1198	292.94	36.8989	228.7
K02/2/A	K2	K2/2	A	river pocket water	river pocket water	river	2008	9	5	11.02. Limnebius parvulus	sb	-	1	1	0	1.5	6.32	16.4	205	0.3	2.6	0.4	0.11	78	143	4.2	0.0075	5.4918	3.53073	0.3817	0.545286	12.9069	5.99269	42.6277	21.5333	12.4816	2.54997	97.45	2.93333	1.67667	1263.3	2.08574	793.9	1.31075	247.06	31.1198	292.94	36.8989	228.7
K02/2/A	K2	K2/2	A	river pocket water	river pocket water	river	2008	9	5	17.01. Georissus sp.	sb	1	-	1	0	1.5	6.32	16.4	205	0.3	2.6	0.4	0.11	78	143	4.2	0.0075	5.4918	3.53073	0.3817	0.545286	12.9069	5.99269	42.6277	21.5333	12.4816	2.54997	97.45	2.93333	1.67667	1263.3	2.08574	793.9	1.31075	247.06	31.1198	292.94	36.8989	228.7
K02/2/A	K2	K2/2	A	river pocket water	river pocket water	river	2008	9	10	01.02. Gyrinus substriatus	sb	-	1	1	0	1.5	6.32	16.4	205	0.3	2.6	0.4	0.11	78	143	4.2	0.0075	5.4918	3.53073	0.3817	0.545286	12.9069	5.99269	42.6277	21.5333	12.4816	2.54997	97.45	2.93333	1.67667	1263.3	2.08574	793.9	1.31075	247.06	31.1198	292.94	36.8989	228.7
K02/2/A	K2	K2/2	A	river pocket water	river pocket water	river	2008	9	10	05.01. Agabus sp.	sb	1	-	1	0	1.5	6.32	16.4	205	0.3	2.6	0.4	0.11	78	143	4.2	0.0075	5.4918	3.53073	0.3817	0.545286	12.9069	5.99269	42.6277	21.5333	12.4816	2.54997	97.45	2.93333	1.67667	1263.3	2.08574	793.9	1.31075	247.06	31.1198	292.94	36.8989	228.7
K02/2/A	K2	K2/2	A	river pocket water	river pocket water	river	2008	9	10	05.02. Ilybius fuliginosus	re	-	1	1	0	1.5	6.32	16.4	205	0.3	2.6	0.4	0.11	78	143	4.2	0.0075	5.4918	3.53073	0.3817	0.545286	12.9069	5.99269	42.6277	21.5333	12.4816	2.54997	97.45	2.93333	1.67667	1263.3	2.08574	793.9	1.31075	247.06	31.1198	292.94	36.8989	228.7
K02/2/A	K2	K2/2	A	river pocket water	river pocket water	river	2008	9	10	10.01. Anacaena limbata	sb	-	2	2	0	1.5	6.32	16.4	205	0.3	2.6	0.4	0.11	78	143	4.2	0.0075	5.4918	3.53073	0.3817	0.545286	12.9069	5.99269	42.6277	21.5333	12.4816	2.54997	97.45	2.93333	1.67667	1263.3	2.08574	793.9	1.31075	247.06	31.1198	292.94	36.8989	228.7
K02/2/A	K2	K2/2	A	river pocket water	river pocket water	river	2008	9	10	11.01. Hydraena palustris	sa	-	1	1	0	1.5	6.32	16.4	205	0.3	2.6	0.4	0.11	78	143	4.2	0.0075	5.4918	3.53073	0.3817	0.545286	12.9069	5.99269	42.6277	21.5333	12.4816	2.54997	97.45	2.93333	1.67667	1263.3	2.08574	793.9	1.31075	247.06	31.1198	292.94	36.8989	228.7
K02/2/A	K2	K2/2	A	river pocket water	river pocket water	river	2008	9	10	11.02. Limnebius parvulus	sb	-	1	1	0	1.5	6.32	16.4	205	0.3	2.6	0.4	0.11	78	143	4.2	0.0075	5.4918	3.53073	0.3817	0.545286	12.9069	5.99269	42.6277	21.5333	12.4816	2.54997	97.45	2.93333	1.67667	1263.3	2.08574	793.9	1.31075	247.06	31.1198	292.94	36.8989	228.7
K02/2/A	K2	K2/2	A	river pocket water	river pocket water	river	2008	9	10	14.06. Scirtes sp.	sb	1	-	1	0	1.5	6.32	16.4	205	0.3	2.6	0.4	0.11	78	143	4.2	0.0075	5.4918	3.53073	0.3817	0.545286	12.9069	5.99269	42.6277	21.5333	12.4816	2.54997	97.45	2.93333	1.67667	1263.3	2.08574	793.9	1.31075	247.06	31.1198	292.94	36.8989	228.7
K02/2/A	K2	K2/2	A	river pocket water	river pocket, wetlands	river	2008	10	13	01.02. Gyrinus substriatus	sb	-	1	1	0	8.5	7.59	10.9	112.2	0.1	1.3	0.2	0	18.4	41	6.9	0.0069	8.19355	8.92782	1.26772	0.768315	18.9351	8.98928	53.7206	5.71626	1.67493	3.91298	96.087	1.24667	1.7903	1263.3	2.08574	793.9	1.31075	247.06	31.1198	292.94	36.8989	228.7
K02/2/A	K2	K2/2	A	river pocket water	river pocket, wetlands	river	2008	10	13	05.01. Agabus sp.	sb	1	-	1	0	8.5	7.59	10.9	112.2	0.1	1.3	0.2	0	18.4	41	6.9	0.0069	8.19355	8.92782	1.26772	0.768315	18.9351	8.98928	53.7206	5.71626	1.67493	3.91298	96.087	1.24667	1.7903	1263.3	2.08574	793.9	1.31075	247.06	31.1198	292.94	36.8989	228.7
K02/2/A	K2	K2/2	A	river pocket water	river pocket, wetlands	river	2008	10	13	10.01. Anacaena limbata	sb	-	1	1	0	8.5	7.59	10.9	112.2	0.1	1.3	0.2	0	18.4	41	6.9	0.0069	8.19355	8.92782	1.26772	0.768315	18.9351	8.98928	53.7206	5.71626	1.67493	3.91298	96.087	1.24667	1.7903	1263.3	2.08574	793.9	1.31075	247.06	31.1198	292.94	36.8989	228.7
K02/2/A	K2	K2/2	A	river pocket water	river pocket, wetlands	river	2008	10	13	11.01. Hydraena palustris	sa	-	4	4	0	8.5	7.59	10.9	112.2	0.1	1.3	0.2	0	18.4	41	6.9	0.0069	8.19355	8.92782	1.26772	0.768315	18.9351	8.98928	53.7206	5.71626	1.67493	3.91298	96.087	1.24667	1.7903	1263.3	2.08574	793.9	1.31075	247.06	31.1198	292.94	36.8989	228.7
K02/2/A	K2	K2/2	A	river pocket water	river pocket, wetlands	river	2008	10	13	14.06. Scirtes sp.	sb	5	-	5	0	8.5	7.59	10.9	112.2	0.1	1.3	0.2	0	18.4	41	6.9	0.0069	8.19355	8.92782	1.26772	0.768315	18.9351	8.98928	53.7206	5.71626	1.67493	3.91298	96.087	1.24667	1.7903	1263.3	2.08574	793.9	1.31075	247.06	31.1198	292.94	36.8989	228.7
K02/2/B	K2	K2/2	B	river pocket water	river pocket water	river	2008	5	5	05.11. Hydaticus transversalis	sb	-	1	1	0	8.8	8.1	13.5	117	0.5	0.4	0.6	0.09	19.3	365	4.1	0.0084	51.1628	0.287013	1.15602	1.69284	21.9352	18.3343	41.0747	9.28805	6.2319	8.69155	91.3084	2.12667	1.3303	1263.3	2.08574	793.9	1.31075	247.06	31.1198	292.94	36.8989	228.7
K02/2/B	K2	K2/2	B	river pocket water	river pocket water	river	2008	7	7	01.02. Gyrinus substriatus	sb	-	5	5	0	5.4	7.5	15.7	159	0.2	1.6	0.2	0.12	19.4	268	5.3	0.0071	51.6484	1.05387	1.28192	2.35652	33.8309	16.9552	43.8513	0.435369	0.234961	0.366716	99.6333	1.24667	1.86303	1263.3	2.08574	793.9	1.31075	247.06	31.1198	292.94	36.8989	228.7
K02/2/B	K2	K2/2	B	river pocket water	river pocket water	river	2008	7	7	05.16. Hydroporus rufifrons	sa	-	1	1	0	5.4	7.5	15.7	159	0.2	1.6	0.2	0.12	19.4	268	5.3	0.0071	51.6484	1.05387	1.28192	2.35652	33.8309	16.9552	43.8513	0.435369	0.234961	0.366716	99.6333	1.24667	1.86303	1263.3	2.08574	793.9	1.31075	247.06	31.1198	292.94	36.8989	228.7
K02/2/B	K2	K2/2	B	river pocket water	river pocket water	river	2008	7	7	10.01. Anacaena lutescens	sa	-	1	1	0	5.4	7.5	15.7	159	0.2	1.6	0.2	0.12	19.4	268	5.3	0.0071	51.6484	1.05387	1.28192	2.35652	33.8309	16.9552	43.8513	0.435369	0.234961	0.366716	99.6333	1.24667	1.86303	1263.3	2.08574	793.9	1.31075	247.06	31.1198	292.94	36.8989	228.7
K02/2/B	K2	K2/2	B	river pocket water	river pocket water	river	2008	7	7	11.01. Hydraena palustris	sa	-	1	1	0	5.4	7.5	15.7	159	0.2	1.6	0.2	0.12	19.4	268	5.3	0.0071	51.6484	1.05387	1.28192	2.35652	33.8309	16.9552	43.8513	0.435369	0.234961	0.366716	99.6333	1.24667	1.86303	1263.3	2.08574	793.9	1.31075	247.06	31.1198	292.94	36.8989	228.7
K02/2/B	K2	K2/2	B	river pocket water	river pocket water	river	2008	7	7	11.02. Limnebius parvulus	sb	-	1	1	0	5.4	7.5	15.7	159	0.2	1.6	0.2	0.12	19.4	268	5.3	0.0071	51.6484	1.05387	1.28192	2.35652	33.8309	16.9552	43.8513	0.435369	0.234961	0.366716	99.6333	1.24667	1.86303	1263.3	2.08574	793.9	1.31075	247.06	31.1198	292.94	36.8989	228.7
K02/2/B	K2	K2/2	B	river pocket water	river pocket water	river	2008	7	7	14.06. Scirtes sp.	sb	1	-	1	0	5.4	7.5	15.7	159	0.2	1.6	0.2	0.12	19.4	268	5.3	0.0071	51.6484	1.05387	1.28192	2.35652	33.8309	16.9552	43.8513	0.435369	0.234961	0.366716	99.6333	1.24667	1.86303	1263.3	2.08574	793.9	1.31075	247.06	31.1198	292.94	36.8989	228.7
K02/2/B	K2	K2/2	B	river pocket water	river pocket water	river	2008	8	5	01.02. Gyrinus substriatus	sb	-	20	20	0	7.5	7.64	16.1	202	0.4	1.2	0.7	0.19	6.4	107	5.4	-0.0061	11.2329	1.14732	0.165772	0.139598	6.74868	2.24229	78.214	10.6225	0.719801	2.54997	97.45	2.26667	1.2253	1263.3	2.08574	793.9	1.31075	247.06	31.1198	292.94	36.8989	228.7
K02/2/B	K2	K2/2	B	river pocket water	river pocket water	river	2008	8	5	05.01. Agabus biguttatus	kr	-	1	1	0	7.5	7.64	16.1	202	0.4	1.2	0.7	0.19	6.4	107	5.4	-0.0061	11.2329	1.14732	0.165772	0.139598	6.74868	2.24229	78.214	10.6225	0.719801	2.54997	97.45	2.26667	1.2253	1263.3	2.08574	793.9	1.31075	247.06	31.1198	292.94	36.8989	228.7
K02/2/B	K2	K2/2	B	river pocket water	river pocket water	river	2008	8	5	05.02. Ilybius fuliginosus	re	-	1	1	0	7.5	7.64	16.1	202	0.4	1.2	0.7	0.19	6.4	107	5.4	-0.0061	11.2329	1.14732	0.165772	0.139598	6.74868	2.24229	78.214	10.6225	0.719801	2.54997	97.45	2.26667	1.2253	1263.3	2.08574	793.9	1.31075	247.06	31.1198	292.94	36.8989	228.7
K02/2/B	K2	K2/2	B	river pocket water	river pocket water	river	2008	8	5	10.01. Anacaena limbata	sb	-	1	1	0	7.5	7.64	16.1	202	0.4	1.2	0.7	0.19	6.4	107	5.4	-0.0061	11.2329	1.14732	0.165772	0.139598	6.74868	2.24229	78.214	10.6225	0.719801	2.54997	97.45	2.26667	1.2253	1263.3	2.08574	793.9	1.31075	247.06	31.1198	292.94	36.8989	228.7
K02/2/B	K2	K2/2	B	river pocket water	river pocket water	river	2008	9	10	01.02. Gyrinus substriatus	sb	-	5	5	0	1.5	6.32	16.4	205	0.3	2.6	0.4	0.11	78	143	4.2	0.0075	5.4918	3.53073	0.3817	0.545286	12.9069	5.99269	42.6277	21.5333	12.4816	2.54997	97.45	2.93333	1.67667	1263.3	2.08574	793.9	1.31075	247.06	31.1198	292.94	36.8989	228.7
K02/2/B	K2	K2/2	B	river pocket water	river pocket water	river	2008	9	10	05.01. Agabus biguttatus	kr	-	1	1	0	1.5	6.32	16.4	205	0.3	2.6	0.4	0.11	78	143	4.2	0.0075	5.4918	3.53073	0.3817	0.545286	12.9069	5.99269	42.6277	21.5333	12.4816	2.54997	97.45	2.93333	1.67667	1263.3	2.08574	793.9	1.31075	247.06	31.1198	292.94	36.8989	228.7
K02/2/B	K2	K2/2	B	river pocket water	river pocket water	river	2008	9	10	10.01. Anacaena lutescens	sa	-	1	1	0	1.5	6.32	16.4	205	0.3	2.6	0.4	0.11	78	143	4.2	0.0075	5.4918	3.53073	0.3817	0.545286	12.9069	5.99269	42.6277	21.5333	12.4816	2.54997	97.45	2.93333	1.67667	1263.3	2.08574	793.9	1.31075	247.06	31.1198	292.94	36.8989	228.7
K02/2/B	K2	K2/2	B	river pocket water	river pocket water	river	2008	9	10	14.06. Scirtes sp.	sb	3	-	3	0	1.5	6.32	16.4	205	0.3	2.6	0.4	0.11	78	143	4.2	0.0075	5.4918	3.53073	0.3817	0.545286	12.9069	5.99269	42.6277	21.5333	12.4816	2.54997	97.45	2.93333	1.67667	1263.3	2.08574	793.9	1.31075	247.06	31.1198	292.94	36.8989	228.7
K02/2/B	K2	K2/2	B	river pocket water	river pocket water	river	2008	10	13	05.01. Agabus biguttatus	kr	-	1	1	0	8.5	7.59	10.9	112.2	0.1	1.3	0.2	0	18.4	41	6.9	0.0069	8.19355	8.92782	1.26772	0.768315	18.9351	8.98928	53.7206	5.71626	1.67493	3.91298	96.087	1.24667	1.7903	1263.3	2.08574	793.9	1.31075	247.06	31.1198	292.94	36.8989	228.7
K02/2/B	K2	K2/2	B	river pocket water	river pocket water	river	2008	10	13	05.05. Rhantus sp.	sb	1	-	1	0	8.5	7.59	10.9	112.2	0.1	1.3	0.2	0	18.4	41	6.9	0.0069	8.19355	8.92782	1.26772	0.768315	18.9351	8.98928	53.7206	5.71626	1.67493	3.91298	96.087	1.24667	1.7903	1263.3	2.08574	793.9	1.31075	247.06	31.1198	292.94	36.8989	228.7
K02/2/B	K2	K2/2	B	river pocket water	river pocket water	river	2008	10	13	06.01. Helophorus griseus	sa	-	1	1	0	8.5	7.59	10.9	112.2	0.1	1.3	0.2	0	18.4	41	6.9	0.0069	8.19355	8.92782	1.26772	0.768315	18.9351	8.98928	53.7206	5.71626	1.67493	3.91298	96.087	1.24667	1.7903	1263.3	2.08574	793.9	1.31075	247.06	31.1198	292.94	36.8989	228.7
K02/2/B	K2	K2/2	B	river pocket water	river pocket water	river	2008	10	13	11.01. Hydraena palustris	sa	-	8	8	0	8.5	7.59	10.9	112.2	0.1	1.3	0.2	0	18.4	41	6.9	0.0069	8.19355	8.92782	1.26772	0.768315	18.9351	8.98928	53.7206	5.71626	1.67493	3.91298	96.087	1.24667	1.7903	1263.3	2.08574	793.9	1.31075	247.06	31.1198	292.94	36.8989	228.7
K02/2/B	K2	K2/2	B	river pocket water	river pocket water	river	2008	10	13	14.06. Scirtes sp.	sb	6	-	6	0	8.5	7.59	10.9	112.2	0.1	1.3	0.2	0	18.4	41	6.9	0.0069	8.19355	8.92782	1.26772	0.768315	18.9351	8.98928	53.7206	5.71626	1.67493	3.91298	96.087	1.24667	1.7903	1263.3	2.08574	793.9	1.31075	247.06	31.1198	292.94	36.8989	228.7
K02/2/C	K2	K2/2	C	river pocket water	river pocket water	river	2008	7	7	05.02. Ilybius fuliginosus	re	-	3	3	0	5.4	7.5	15.7	159	0.2	1.6	0.2	0.12	19.4	268	5.3	0.0071	51.6484	1.05387	1.28192	2.35652	33.8309	16.9552	43.8513	0.435369	0.234961	0.366716	99.6333	1.24667	1.86303	1263.3	2.08574	793.9	1.31075	247.06	31.1198	292.94	36.8989	228.7
K02/2/C	K2	K2/2	C	river pocket water	river pocket water	river	2008	8	5	05.01. Agabus bipustulatus	sb	-	1	1	0	7.5	7.64	16.1	202	0.4	1.2	0.7	0.19	6.4	107	5.4	-0.0061	11.2329	1.14732	0.165772	0.139598	6.74868	2.24229	78.214	10.6225	0.719801	2.54997	97.45	2.26667	1.2253	1263.3	2.08574	793.9	1.31075	247.06	31.1198	292.94	36.8989	228.7
K02/2/C	K2	K2/2	C	river pocket water	river pocket water	river	2008	8	5	05.02. Ilybius fuliginosus	re	-	1	1	0	7.5	7.64	16.1	202	0.4	1.2	0.7	0.19	6.4	107	5.4	-0.0061	11.2329	1.14732	0.165772	0.139598	6.74868	2.24229	78.214	10.6225	0.719801	2.54997	97.45	2.26667	1.2253	1263.3	2.08574	793.9	1.31075	247.06	31.1198	292.94	36.8989	228.7
K02/2/C	K2	K2/2	C	river pocket water	river pocket water	river	2008	8	5	05.16. Hydroporus erytrocephalus	sa	-	1	1	0	7.5	7.64	16.1	202	0.4	1.2	0.7	0.19	6.4	107	5.4	-0.0061	11.2329	1.14732	0.165772	0.139598	6.74868	2.24229	78.214	10.6225	0.719801	2.54997	97.45	2.26667	1.2253	1263.3	2.08574	793.9	1.31075	247.06	31.1198	292.94	36.8989	228.7
K02/2/C	K2	K2/2	C	river pocket water	river pocket water	river	2008	8	5	11.01. Hydraena palustris	sa	-	3	3	0	7.5	7.64	16.1	202	0.4	1.2	0.7	0.19	6.4	107	5.4	-0.0061	11.2329	1.14732	0.165772	0.139598	6.74868	2.24229	78.214	10.6225	0.719801	2.54997	97.45	2.26667	1.2253	1263.3	2.08574	793.9	1.31075	247.06	31.1198	292.94	36.8989	228.7
K02/2/C	K2	K2/2	C	river pocket water	river pocket water	river	2008	8	5	11.02. Limnebius parvulus	sb	-	1	1	0	7.5	7.64	16.1	202	0.4	1.2	0.7	0.19	6.4	107	5.4	-0.0061	11.2329	1.14732	0.165772	0.139598	6.74868	2.24229	78.214	10.6225	0.719801	2.54997	97.45	2.26667	1.2253	1263.3	2.08574	793.9	1.31075	247.06	31.1198	292.94	36.8989	228.7
K02/2/C	K2	K2/2	C	river pocket water	river pocket water	river	2008	9	10	05.02. Ilybius fuliginosus	re	-	1	1	0	1.5	6.32	16.4	205	0.3	2.6	0.4	0.11	78	143	4.2	0.0075	5.4918	3.53073	0.3817	0.545286	12.9069	5.99269	42.6277	21.5333	12.4816	2.54997	97.45	2.93333	1.67667	1263.3	2.08574	793.9	1.31075	247.06	31.1198	292.94	36.8989	228.7
K02/2/C	K2	K2/2	C	river pocket water	river pocket water	river	2008	9	10	05.24. Hygrotus decoratus	sa	-	1	1	0	1.5	6.32	16.4	205	0.3	2.6	0.4	0.11	78	143	4.2	0.0075	5.4918	3.53073	0.3817	0.545286	12.9069	5.99269	42.6277	21.5333	12.4816	2.54997	97.45	2.93333	1.67667	1263.3	2.08574	793.9	1.31075	247.06	31.1198	292.94	36.8989	228.7
K02/2/C	K2	K2/2	C	river pocket water	river pocket water	river	2008	9	10	11.01. Hydraena palustris	sa	-	3	3	0	1.5	6.32	16.4	205	0.3	2.6	0.4	0.11	78	143	4.2	0.0075	5.4918	3.53073	0.3817	0.545286	12.9069	5.99269	42.6277	21.5333	12.4816	2.54997	97.45	2.93333	1.67667	1263.3	2.08574	793.9	1.31075	247.06	31.1198	292.94	36.8989	228.7
K02/2/C	K2	K2/2	C	river pocket water	river pocket, wetlands	river	2008	10	13	10.01. Anacaena limbata	sb	-	2	2	0	8.5	7.59	10.9	112.2	0.1	1.3	0.2	0	18.4	41	6.9	0.0069	8.19355	8.92782	1.26772	0.768315	18.9351	8.98928	53.7206	5.71626	1.67493	3.91298	96.087	1.24667	1.7903	1263.3	2.08574	793.9	1.31075	247.06	31.1198	292.94	36.8989	228.7
K02/2/C	K2	K2/2	C	river pocket water	river pocket, wetlands	river	2008	10	13	11.01. Hydraena palustris	sa	-	1	1	0	8.5	7.59	10.9	112.2	0.1	1.3	0.2	0	18.4	41	6.9	0.0069	8.19355	8.92782	1.26772	0.768315	18.9351	8.98928	53.7206	5.71626	1.67493	3.91298	96.087	1.24667	1.7903	1263.3	2.08574	793.9	1.31075	247.06	31.1198	292.94	36.8989	228.7
K02/2/C	K2	K2/2	C	river pocket water	river pocket, wetlands	river	2008	10	13	14.06. Scirtes sp.	sb	5	-	5	0	8.5	7.59	10.9	112.2	0.1	1.3	0.2	0	18.4	41	6.9	0.0069	8.19355	8.92782	1.26772	0.768315	18.9351	8.98928	53.7206	5.71626	1.67493	3.91298	96.087	1.24667	1.7903	1263.3	2.08574	793.9	1.31075	247.06	31.1198	292.94	36.8989	228.7
K02/3/A	K2	K2/3	A	river current	river current, sand	river	2008	4	14	11.01. Hydraena palustris	sa	-	1	1	0	10.2	6.3	7.6	241	0.3	0.4	0.9	0.04	42	140	4.1	0.4084	53	0	0.23665	0.689371	1.4199	1.4199	90.4928	4.85132	0.890009	4.49352	95.5065	2.26667	0.634394	1263.3	2.08574	793.9	1.31075	247.06	31.1198	292.94	36.8989	228.7
K02/3/A	K2	K2/3	A	river current	river current sand	river	2008	7	7	05.01. Agabus undulatus	sb	-	1	1	0	5.4	7.5	15.7	159	0.2	1.6	0.2	0.12	19.4	268	5.3	0.2457	51.6484	0	0	0	1.05908	1.9728	86.0503	9.09044	1.82743	1.63641	98.3636	2.79333	0.761667	1263.3	2.08574	793.9	1.31075	247.06	31.1198	292.94	36.8989	228.7
K02/3/A	K2	K2/3	A	river current	river current sand	river	2008	7	7	05.02. Ilybius fuliginosus	re	-	1	1	0	5.4	7.5	15.7	159	0.2	1.6	0.2	0.12	19.4	268	5.3	0.2457	51.6484	0	0	0	1.05908	1.9728	86.0503	9.09044	1.82743	1.63641	98.3636	2.79333	0.761667	1263.3	2.08574	793.9	1.31075	247.06	31.1198	292.94	36.8989	228.7
K02/3/A	K2	K2/3	A	river current	river current sand	river	2008	7	7	11.01. Hydraena palustris	sa	-	16	16	0	5.4	7.5	15.7	159	0.2	1.6	0.2	0.12	19.4	268	5.3	0.2457	51.6484	0	0	0	1.05908	1.9728	86.0503	9.09044	1.82743	1.63641	98.3636	2.79333	0.761667	1263.3	2.08574	793.9	1.31075	247.06	31.1198	292.94	36.8989	228.7
K02/3/A	K2	K2/3	A	river current	river current sand	river	2008	10	13	11.01. Hydraena palustris	sa	-	24	24	0	8.5	7.59	10.9	112.2	0.1	1.3	0.2	0	18.4	41	7.7	0.2739	8.19355	1.47059	0.610969	0.852515	31.1949	8.56067	43.187	9.96732	4.15601	1.11207	98.8879	1.24667	1.9903	1263.3	2.08574	793.9	1.31075	247.06	31.1198	292.94	36.8989	228.7
K02/3/B	K2	K2/3	B	river current	river current sand	river	2008	6	2	05.01. Agabus biguttatus	kr	-	1	1	0	8.9	6.75	16.8	123	0.5	5.3	0.6	0.24	5.7	126	4.9	0.3135	54.9451	0	0	0	0.944197	1.74851	85.6422	9.65679	2.00829	1.63641	98.3636	2.26667	0.761667	1263.3	2.08574	793.9	1.31075	247.06	31.1198	292.94	36.8989	228.7
K02/3/B	K2	K2/3	B	river current	river current sand	river	2008	7	7	06.01. Helophorus griseus	sa	-	1	1	0	5.4	7.5	15.7	159	0.2	1.6	0.2	0.12	19.4	268	5.3	0.2457	51.6484	0	0	0	1.05908	1.9728	86.0503	9.09044	1.82743	1.63641	98.3636	2.79333	0.761667	1263.3	2.08574	793.9	1.31075	247.06	31.1198	292.94	36.8989	228.7
K02/3/B	K2	K2/3	B	river current	river current sand	river	2008	7	7	11.01. Hydraena palustris	sa	-	8	8	0	5.4	7.5	15.7	159	0.2	1.6	0.2	0.12	19.4	268	5.3	0.2457	51.6484	0	0	0	1.05908	1.9728	86.0503	9.09044	1.82743	1.63641	98.3636	2.79333	0.761667	1263.3	2.08574	793.9	1.31075	247.06	31.1198	292.94	36.8989	228.7
K02/3/B	K2	K2/3	B	river current	river current sand	river	2008	9	10	11.01. Hydraena palustris	sa	-	34	34	0	1.5	6.32	16.4	205	0.3	2.6	0.4	0.11	78	143	4.3	0.1821	5.4918	0	0.180433	0.280674	51.6506	19.9479	26.938	0.818631	0.183774	0.369323	99.6307	0	0	1263.3	2.08574	793.9	1.31075	247.06	31.1198	292.94	36.8989	228.7
K02/3/B	K2	K2/3	B	river current	river current sand	river	2008	10	13	05.05. Rhantus sp.	sb	1	-	1	0	8.5	7.59	10.9	112.2	0.1	1.3	0.2	0	18.4	41	7.7	0.2739	8.19355	1.47059	0.610969	0.852515	31.1949	8.56067	43.187	9.96732	4.15601	1.11207	98.8879	1.24667	1.9903	1263.3	2.08574	793.9	1.31075	247.06	31.1198	292.94	36.8989	228.7
K02/3/B	K2	K2/3	B	river current	river current sand	river	2008	10	13	11.01. Hydraena palustris	sa	-	6	6	0	8.5	7.59	10.9	112.2	0.1	1.3	0.2	0	18.4	41	7.7	0.2739	8.19355	1.47059	0.610969	0.852515	31.1949	8.56067	43.187	9.96732	4.15601	1.11207	98.8879	1.24667	1.9903	1263.3	2.08574	793.9	1.31075	247.06	31.1198	292.94	36.8989	228.7
K02/3/C	K2	K2/3	C	river current	river current sand	river	2008	7	7	11.01. Hydraena palustris	sa	-	7	7	0	5.4	7.5	15.7	159	0.2	1.6	0.2	0.12	19.4	268	5.3	0.2457	51.6484	0	0	0	1.05908	1.9728	86.0503	9.09044	1.82743	1.63641	98.3636	2.79333	0.761667	1263.3	2.08574	793.9	1.31075	247.06	31.1198	292.94	36.8989	228.7
K02/3/C	K2	K2/3	C	river current	river current sand	river	2008	8	5	11.01. Hydraena palustris	sa	-	227	227	0	7.5	7.64	16.1	202	0.4	1.2	0.7	0.19	6.4	107	5.6	0.2401	11.2329	0	0	0.221795	31.9779	22.9213	44.4699	0.133077	0.276012	0.369323	99.6307	1.24667	1.86303	1263.3	2.08574	793.9	1.31075	247.06	31.1198	292.94	36.8989	228.7
K02/3/C	K2	K2/3	C	river current	river current sand	river	2008	8	5	11.02. Limnebius parvulus	sb	-	1	1	0	7.5	7.64	16.1	202	0.4	1.2	0.7	0.19	6.4	107	5.6	0.2401	11.2329	0	0	0.221795	31.9779	22.9213	44.4699	0.133077	0.276012	0.369323	99.6307	1.24667	1.86303	1263.3	2.08574	793.9	1.31075	247.06	31.1198	292.94	36.8989	228.7
K02/3/C	K2	K2/3	C	river current	river current sand	river	2008	9	10	11.01. Hydraena palustris	sa	-	54	54	0	1.5	6.32	16.4	205	0.3	2.6	0.4	0.11	78	143	4.3	0.1821	5.4918	0	0.180433	0.280674	51.6506	19.9479	26.938	0.818631	0.183774	0.369323	99.6307	0	0	1263.3	2.08574	793.9	1.31075	247.06	31.1198	292.94	36.8989	228.7
K02/3/C	K2	K2/3	C	river current	river current sand	river	2008	9	10	11.01. Hydraena palustris	sa	-	2	2	0	1.5	6.32	16.4	205	0.3	2.6	0.4	0.11	78	143	4.3	0.1821	5.4918	0	0.180433	0.280674	51.6506	19.9479	26.938	0.818631	0.183774	0.369323	99.6307	0	0	1263.3	2.08574	793.9	1.31075	247.06	31.1198	292.94	36.8989	228.7
K02/3/C	K2	K2/3	C	river current	river current sand	river	2008	9	10	14.06. Scirtes sp.	sb	1	-	1	0	1.5	6.32	16.4	205	0.3	2.6	0.4	0.11	78	143	4.3	0.1821	5.4918	0	0.180433	0.280674	51.6506	19.9479	26.938	0.818631	0.183774	0.369323	99.6307	0	0	1263.3	2.08574	793.9	1.31075	247.06	31.1198	292.94	36.8989	228.7
K02/3/C	K2	K2/3	C	river current	river current sand, wetlands	river	2008	10	13	11.01. Hydraena palustris	sa	12	-	12	0	8.5	7.59	10.9	112.2	0.1	1.3	0.2	0	18.4	41	7.7	0.2739	8.19355	1.47059	0.610969	0.852515	31.1949	8.56067	43.187	9.96732	4.15601	1.11207	98.8879	1.24667	1.9903	1263.3	2.08574	793.9	1.31075	247.06	31.1198	292.94	36.8989	228.7
K03/1/A	K3	K3/1	A	river pocket water	river pocket water	river	2008	5	6	10.01. Anacaena lutescens	sa	-	6	6	2	11.1	8.3	18.5	111	2	0.4	0.1	0.04	23	133	7.1	0.0472	100	3.35053	1.5628	1.3534	16.3299	4.94435	70.9737	1.41544	0.0698026	7.43313	92.5669	2.12667	1.25455	1745.4	2.88171	482.1	0.795961	199.58	41.3981	52.41	10.8712	190.41
K03/1/A	K3	K3/1	A	river pocket water	river pocket water	river	2008	5	6	10.13. Laccobius minutus	sa	-	5	5	2	11.1	8.3	18.5	111	2	0.4	0.1	0.04	23	133	7.1	0.0472	100	3.35053	1.5628	1.3534	16.3299	4.94435	70.9737	1.41544	0.0698026	7.43313	92.5669	2.12667	1.25455	1745.4	2.88171	482.1	0.795961	199.58	41.3981	52.41	10.8712	190.41
K03/1/A	K3	K3/1	A	river pocket water	river pocket, wetlands	river	2008	6	2	10.13. Laccobius minutus	sa	-	1	1	4	4.3	6.8	18.9	135	0.8	3.4	0.7	0.08	57.9	245	6.8	0.0073	100	3.35053	1.5628	1.3534	16.3299	4.94435	70.9737	1.41544	0.0698026	7.43313	92.5669	2.12667	1.25455	1745.4	2.88171	482.1	0.795961	199.58	41.3981	52.41	10.8712	190.41
K03/1/A	K3	K3/1	A	river pocket water	river pocket water	river	2008	7	8	05.02. Ilybius fuliginosus	re	-	2	2	4	8.9	7.76	18.4	184	0.6	1.1	0.1	0.03	40.3	347	5	0.0056	100	3.35053	1.5628	1.3534	16.3299	4.94435	70.9737	1.41544	0.0698026	1.1333	98.8667	2.12667	1.25455	1745.4	2.88171	482.1	0.795961	199.58	41.3981	52.41	10.8712	190.41
K03/1/A	K3	K3/1	A	river pocket water	river pocket water	river	2008	7	8	05.02. Ilybius quadriguttatus	sa	-	1	1	4	8.9	7.76	18.4	184	0.6	1.1	0.1	0.03	40.3	347	5	0.0056	100	3.35053	1.5628	1.3534	16.3299	4.94435	70.9737	1.41544	0.0698026	1.1333	98.8667	2.12667	1.25455	1745.4	2.88171	482.1	0.795961	199.58	41.3981	52.41	10.8712	190.41
K03/1/A	K3	K3/1	A	river pocket water	river pocket water	river	2008	7	8	05.10. Dytiscus marginalis	sb	-	1	1	4	8.9	7.76	18.4	184	0.6	1.1	0.1	0.03	40.3	347	5	0.0056	100	3.35053	1.5628	1.3534	16.3299	4.94435	70.9737	1.41544	0.0698026	1.1333	98.8667	2.12667	1.25455	1745.4	2.88171	482.1	0.795961	199.58	41.3981	52.41	10.8712	190.41
K03/1/A	K3	K3/1	A	river pocket water	river pocket water	river	2008	7	8	06.01. Helophorus granularis	sa	-	1	1	4	8.9	7.76	18.4	184	0.6	1.1	0.1	0.03	40.3	347	5	0.0056	100	3.35053	1.5628	1.3534	16.3299	4.94435	70.9737	1.41544	0.0698026	1.1333	98.8667	2.12667	1.25455	1745.4	2.88171	482.1	0.795961	199.58	41.3981	52.41	10.8712	190.41
K03/1/A	K3	K3/1	A	river pocket water	river pocket water	river	2008	7	8	06.01. Helophorus griseus	sa	-	1	1	4	8.9	7.76	18.4	184	0.6	1.1	0.1	0.03	40.3	347	5	0.0056	100	3.35053	1.5628	1.3534	16.3299	4.94435	70.9737	1.41544	0.0698026	1.1333	98.8667	2.12667	1.25455	1745.4	2.88171	482.1	0.795961	199.58	41.3981	52.41	10.8712	190.41
K03/1/A	K3	K3/1	A	river pocket water	river pocket water	river	2008	7	8	10.09. Hydrobius fuscipes	sb	-	1	1	4	8.9	7.76	18.4	184	0.6	1.1	0.1	0.03	40.3	347	5	0.0056	100	3.35053	1.5628	1.3534	16.3299	4.94435	70.9737	1.41544	0.0698026	1.1333	98.8667	2.12667	1.25455	1745.4	2.88171	482.1	0.795961	199.58	41.3981	52.41	10.8712	190.41
K03/1/A	K3	K3/1	A	river pocket water	river pocket water	river	2008	7	8	10.13. Laccobius minutus	sa	-	3	3	4	8.9	7.76	18.4	184	0.6	1.1	0.1	0.03	40.3	347	5	0.0056	100	3.35053	1.5628	1.3534	16.3299	4.94435	70.9737	1.41544	0.0698026	1.1333	98.8667	2.12667	1.25455	1745.4	2.88171	482.1	0.795961	199.58	41.3981	52.41	10.8712	190.41
K03/1/A	K3	K3/1	A	river pocket water	river pocket water	river	2008	7	8	10.14. Coelostoma orbiculare	sb	-	1	1	4	8.9	7.76	18.4	184	0.6	1.1	0.1	0.03	40.3	347	5	0.0056	100	3.35053	1.5628	1.3534	16.3299	4.94435	70.9737	1.41544	0.0698026	1.1333	98.8667	2.12667	1.25455	1745.4	2.88171	482.1	0.795961	199.58	41.3981	52.41	10.8712	190.41
K03/1/A	K3	K3/1	A	river pocket water	river pocket water	river	2008	7	8	10.15. Cercyon tristis	sb	-	1	1	4	8.9	7.76	18.4	184	0.6	1.1	0.1	0.03	40.3	347	5	0.0056	100	3.35053	1.5628	1.3534	16.3299	4.94435	70.9737	1.41544	0.0698026	1.1333	98.8667	2.12667	1.25455	1745.4	2.88171	482.1	0.795961	199.58	41.3981	52.41	10.8712	190.41
K03/1/A	K3	K3/1	A	river pocket water	river pocket water	river	2008	8	5	05.01. Agabus bipustulatus	sb	-	1	1	4	10.4	7.24	21.1	155.5	0.3	1.2	0.1	0.04	36	47	8.6	0.0068	100	12.02	2.46419	1.73982	27.6122	10.7102	41.2	1.84236	2.41127	3.35575	96.6442	1.13333	1.74803	1745.4	2.88171	482.1	0.795961	199.58	41.3981	52.41	10.8712	190.41
K03/1/A	K3	K3/1	A	river pocket water	river pocket water	river	2008	8	5	05.02. Ilybius fuliginosus	re	-	6	6	4	10.4	7.24	21.1	155.5	0.3	1.2	0.1	0.04	36	47	8.6	0.0068	100	12.02	2.46419	1.73982	27.6122	10.7102	41.2	1.84236	2.41127	3.35575	96.6442	1.13333	1.74803	1745.4	2.88171	482.1	0.795961	199.58	41.3981	52.41	10.8712	190.41
K03/1/A	K3	K3/1	A	river pocket water	river pocket water	river	2008	8	5	06.01. Helophorus griseus	sa	-	1	1	4	10.4	7.24	21.1	155.5	0.3	1.2	0.1	0.04	36	47	8.6	0.0068	100	12.02	2.46419	1.73982	27.6122	10.7102	41.2	1.84236	2.41127	3.35575	96.6442	1.13333	1.74803	1745.4	2.88171	482.1	0.795961	199.58	41.3981	52.41	10.8712	190.41
K03/1/A	K3	K3/1	A	river pocket water	river pocket water	river	2008	9	10	05.02. Ilybius fuliginosus	re	-	1	1	4	6.5	5.85	16.3	145.5	3	1.5	0.6	0.01	19.8	155	6.2	0.0467	100	10.6126	1.90196	1.7384	26.8143	10.122	43.9226	3.67307	1.21501	3.35575	96.6442	1.24667	1.66303	1745.4	2.88171	482.1	0.795961	199.58	41.3981	52.41	10.8712	190.41
K03/1/A	K3	K3/1	A	river pocket water	river pocket water	river	2008	9	10	05.10. Dytiscus dimidiatus	sb	-	1	1	4	6.5	5.85	16.3	145.5	3	1.5	0.6	0.01	19.8	155	6.2	0.0467	100	10.6126	1.90196	1.7384	26.8143	10.122	43.9226	3.67307	1.21501	3.35575	96.6442	1.24667	1.66303	1745.4	2.88171	482.1	0.795961	199.58	41.3981	52.41	10.8712	190.41
K03/1/A	K3	K3/1	A	river pocket water	river pocket water	river	2008	9	10	10.01. Anacaena limbata	sb	-	4	4	4	6.5	5.85	16.3	145.5	3	1.5	0.6	0.01	19.8	155	6.2	0.0467	100	10.6126	1.90196	1.7384	26.8143	10.122	43.9226	3.67307	1.21501	3.35575	96.6442	1.24667	1.66303	1745.4	2.88171	482.1	0.795961	199.58	41.3981	52.41	10.8712	190.41
K03/1/A	K3	K3/1	A	river pocket water	river pocket, meadow	river	2008	10	13	05.01. Agabus sp.	sb	11	-	11	4	10.4	8.76	11.4	148.9	0.2	2	0.1	0	5.2	150	7.7	0.0472	100	19.7449	1.95825	2.20013	30.6163	10.2386	31.8224	2.72034	0.699139	3.50257	96.4974	1.54667	1.33303	1745.4	2.88171	482.1	0.795961	199.58	41.3981	52.41	10.8712	190.41
K03/1/A	K3	K3/1	A	river pocket water	river pocket, meadow	river	2008	10	13	06.01. Helophorus granularis	sa	-	1	1	4	10.4	8.76	11.4	148.9	0.2	2	0.1	0	5.2	150	7.7	0.0472	100	19.7449	1.95825	2.20013	30.6163	10.2386	31.8224	2.72034	0.699139	3.50257	96.4974	1.54667	1.33303	1745.4	2.88171	482.1	0.795961	199.58	41.3981	52.41	10.8712	190.41
K03/1/A	K3	K3/1	A	river pocket water	river pocket, meadow	river	2008	10	13	10.01. Anacaena limbata	sb	-	10	10	4	10.4	8.76	11.4	148.9	0.2	2	0.1	0	5.2	150	7.7	0.0472	100	19.7449	1.95825	2.20013	30.6163	10.2386	31.8224	2.72034	0.699139	3.50257	96.4974	1.54667	1.33303	1745.4	2.88171	482.1	0.795961	199.58	41.3981	52.41	10.8712	190.41
K03/1/A	K3	K3/1	A	river pocket water	river pocket, meadow	river	2008	10	13	10.13. Laccobius minutus	sa	-	19	19	4	10.4	8.76	11.4	148.9	0.2	2	0.1	0	5.2	150	7.7	0.0472	100	19.7449	1.95825	2.20013	30.6163	10.2386	31.8224	2.72034	0.699139	3.50257	96.4974	1.54667	1.33303	1745.4	2.88171	482.1	0.795961	199.58	41.3981	52.41	10.8712	190.41
K03/1/A	K3	K3/1	A	river pocket water	river pocket, meadow	river	2008	10	13	11.01. Hydraena palustris	sa	-	14	14	4	10.4	8.76	11.4	148.9	0.2	2	0.1	0	5.2	150	7.7	0.0472	100	19.7449	1.95825	2.20013	30.6163	10.2386	31.8224	2.72034	0.699139	3.50257	96.4974	1.54667	1.33303	1745.4	2.88171	482.1	0.795961	199.58	41.3981	52.41	10.8712	190.41
K03/1/A	K3	K3/1	A	river pocket water	river pocket, meadow	river	2008	10	13	11.02. Limnebius atomus	sb	-	1	1	4	10.4	8.76	11.4	148.9	0.2	2	0.1	0	5.2	150	7.7	0.0472	100	19.7449	1.95825	2.20013	30.6163	10.2386	31.8224	2.72034	0.699139	3.50257	96.4974	1.54667	1.33303	1745.4	2.88171	482.1	0.795961	199.58	41.3981	52.41	10.8712	190.41
K03/1/A	K3	K3/1	A	river pocket water	river pocket, meadow	river	2008	10	13	11.02. Limnebius parvulus	sb	-	1	1	4	10.4	8.76	11.4	148.9	0.2	2	0.1	0	5.2	150	7.7	0.0472	100	19.7449	1.95825	2.20013	30.6163	10.2386	31.8224	2.72034	0.699139	3.50257	96.4974	1.54667	1.33303	1745.4	2.88171	482.1	0.795961	199.58	41.3981	52.41	10.8712	190.41
K03/1/A	K3	K3/1	A	river pocket water	river pocket, meadow	river	2008	10	13	14.05. Prionocyphon serricornis	sb	1	-	1	4	10.4	8.76	11.4	148.9	0.2	2	0.1	0	5.2	150	7.7	0.0472	100	19.7449	1.95825	2.20013	30.6163	10.2386	31.8224	2.72034	0.699139	3.50257	96.4974	1.54667	1.33303	1745.4	2.88171	482.1	0.795961	199.58	41.3981	52.41	10.8712	190.41
K03/1/A	K3	K3/1	A	river pocket water	river pocket water	river	2008	6	3	10.13. Laccobius minutus	sa	-	4	4	4	4.3	6.8	18.9	135	0.8	3.4	0.7	0.08	57.9	245	6.8	0.0073	100	3.35053	1.5628	1.3534	16.3299	4.94435	70.9737	1.41544	0.0698026	7.43313	92.5669	2.12667	1.25455	1745.4	2.88171	482.1	0.795961	199.58	41.3981	52.41	10.8712	190.41
K03/1/A	K3	K3/1	A	river pocket water	river pocket water	river	2008	6	3	10.15. Cercyon bifenestratus	sb	-	1	1	4	4.3	6.8	18.9	135	0.8	3.4	0.7	0.08	57.9	245	6.8	0.0073	100	3.35053	1.5628	1.3534	16.3299	4.94435	70.9737	1.41544	0.0698026	7.43313	92.5669	2.12667	1.25455	1745.4	2.88171	482.1	0.795961	199.58	41.3981	52.41	10.8712	190.41
K03/1/B	K3	K3/1	B	river pocket water	river pocket water	river	2008	4	15	10.01. Anacaena limbata	sb	-	8	8	1	9.4	7.7	11.2	274	0.8	0.6	2.5	0.01	78.9	85	6.4	0.052	100	0.0548396	0.0377022	0.0959693	24.9417	14.6182	58.8566	1.1482	0.246778	0.777141	99.2229	2.12667	1.20303	1745.4	2.88171	482.1	0.795961	199.58	41.3981	52.41	10.8712	190.41
K03/1/B	K3	K3/1	B	river pocket water	river pocket water	river	2008	4	15	14.01. Cyphon sp.	sb	1	-	1	1	9.4	7.7	11.2	274	0.8	0.6	2.5	0.01	78.9	85	6.4	0.052	100	0.0548396	0.0377022	0.0959693	24.9417	14.6182	58.8566	1.1482	0.246778	0.777141	99.2229	2.12667	1.20303	1745.4	2.88171	482.1	0.795961	199.58	41.3981	52.41	10.8712	190.41
K03/1/B	K3	K3/1	B	river pocket water	river pocket water	river	2008	7	8	05.02. Ilybius subaeneus	sa	-	1	1	4	8.9	7.76	18.4	184	0.6	1.1	0.1	0.03	40.3	347	5	0.0056	100	3.35053	1.5628	1.3534	16.3299	4.94435	70.9737	1.41544	0.0698026	1.1333	98.8667	2.12667	1.25455	1745.4	2.88171	482.1	0.795961	199.58	41.3981	52.41	10.8712	190.41
K03/1/B	K3	K3/1	B	river pocket water	river pocket water	river	2008	7	8	05.16. Hydroporus obscurus	sa	-	5	5	4	8.9	7.76	18.4	184	0.6	1.1	0.1	0.03	40.3	347	5	0.0056	100	3.35053	1.5628	1.3534	16.3299	4.94435	70.9737	1.41544	0.0698026	1.1333	98.8667	2.12667	1.25455	1745.4	2.88171	482.1	0.795961	199.58	41.3981	52.41	10.8712	190.41
K03/1/B	K3	K3/1	B	river pocket water	river pocket water	river	2008	7	8	06.01. Helophorus griseus	sa	-	1	1	4	8.9	7.76	18.4	184	0.6	1.1	0.1	0.03	40.3	347	5	0.0056	100	3.35053	1.5628	1.3534	16.3299	4.94435	70.9737	1.41544	0.0698026	1.1333	98.8667	2.12667	1.25455	1745.4	2.88171	482.1	0.795961	199.58	41.3981	52.41	10.8712	190.41
K03/1/B	K3	K3/1	B	river pocket water	river pocket water	river	2008	7	8	10.13. Laccobius minutus	sa	-	1	1	4	8.9	7.76	18.4	184	0.6	1.1	0.1	0.03	40.3	347	5	0.0056	100	3.35053	1.5628	1.3534	16.3299	4.94435	70.9737	1.41544	0.0698026	1.1333	98.8667	2.12667	1.25455	1745.4	2.88171	482.1	0.795961	199.58	41.3981	52.41	10.8712	190.41
K03/1/B	K3	K3/1	B	river pocket water	river pocket water	river	2008	8	5	05.01. Agabus bipustulatus	sb	-	1	1	4	10.4	7.24	21.1	155.5	0.3	1.2	0.1	0.04	36	47	8.6	0.0068	100	12.02	2.46419	1.73982	27.6122	10.7102	41.2	1.84236	2.41127	3.35575	96.6442	1.13333	1.74803	1745.4	2.88171	482.1	0.795961	199.58	41.3981	52.41	10.8712	190.41
K03/1/B	K3	K3/1	B	river pocket water	river pocket water	river	2008	8	5	05.02. Ilybius fenestratus	re	-	1	1	4	10.4	7.24	21.1	155.5	0.3	1.2	0.1	0.04	36	47	8.6	0.0068	100	12.02	2.46419	1.73982	27.6122	10.7102	41.2	1.84236	2.41127	3.35575	96.6442	1.13333	1.74803	1745.4	2.88171	482.1	0.795961	199.58	41.3981	52.41	10.8712	190.41
K03/1/B	K3	K3/1	B	river pocket water	river pocket water	river	2008	8	5	05.02. Ilybius fuliginosus	re	-	1	1	4	10.4	7.24	21.1	155.5	0.3	1.2	0.1	0.04	36	47	8.6	0.0068	100	12.02	2.46419	1.73982	27.6122	10.7102	41.2	1.84236	2.41127	3.35575	96.6442	1.13333	1.74803	1745.4	2.88171	482.1	0.795961	199.58	41.3981	52.41	10.8712	190.41
K03/1/B	K3	K3/1	B	river pocket water	river pocket water	river	2008	8	5	05.02. Ilybius fuliginosus	re	-	3	3	4	10.4	7.24	21.1	155.5	0.3	1.2	0.1	0.04	36	47	8.6	0.0068	100	12.02	2.46419	1.73982	27.6122	10.7102	41.2	1.84236	2.41127	3.35575	96.6442	1.13333	1.74803	1745.4	2.88171	482.1	0.795961	199.58	41.3981	52.41	10.8712	190.41
K03/1/B	K3	K3/1	B	river pocket water	river pocket water	river	2008	8	5	10.09. Hydrobius fuscipes	sb	-	1	1	4	10.4	7.24	21.1	155.5	0.3	1.2	0.1	0.04	36	47	8.6	0.0068	100	12.02	2.46419	1.73982	27.6122	10.7102	41.2	1.84236	2.41127	3.35575	96.6442	1.13333	1.74803	1745.4	2.88171	482.1	0.795961	199.58	41.3981	52.41	10.8712	190.41
K03/1/B	K3	K3/1	B	river pocket water	river pocket water	river	2008	8	5	10.13. Laccobius minutus	sa	-	1	1	4	10.4	7.24	21.1	155.5	0.3	1.2	0.1	0.04	36	47	8.6	0.0068	100	12.02	2.46419	1.73982	27.6122	10.7102	41.2	1.84236	2.41127	3.35575	96.6442	1.13333	1.74803	1745.4	2.88171	482.1	0.795961	199.58	41.3981	52.41	10.8712	190.41
K03/1/B	K3	K3/1	B	river pocket water	river pocket water	river	2008	9	10	02.02. Haliplus heydeni	sb	-	2	2	4	6.5	5.85	16.3	145.5	3	1.5	0.6	0.01	19.8	155	6.2	0.0467	100	10.6126	1.90196	1.7384	26.8143	10.122	43.9226	3.67307	1.21501	3.35575	96.6442	1.24667	1.66303	1745.4	2.88171	482.1	0.795961	199.58	41.3981	52.41	10.8712	190.41
K03/1/B	K3	K3/1	B	river pocket water	river pocket water	river	2008	9	10	05.01. Agabus sp.	sb	1	-	1	4	6.5	5.85	16.3	145.5	3	1.5	0.6	0.01	19.8	155	6.2	0.0467	100	10.6126	1.90196	1.7384	26.8143	10.122	43.9226	3.67307	1.21501	3.35575	96.6442	1.24667	1.66303	1745.4	2.88171	482.1	0.795961	199.58	41.3981	52.41	10.8712	190.41
K03/1/B	K3	K3/1	B	river pocket water	river pocket water	river	2008	9	10	08.01. Hydrochus angustatus	sb	-	1	1	4	6.5	5.85	16.3	145.5	3	1.5	0.6	0.01	19.8	155	6.2	0.0467	100	10.6126	1.90196	1.7384	26.8143	10.122	43.9226	3.67307	1.21501	3.35575	96.6442	1.24667	1.66303	1745.4	2.88171	482.1	0.795961	199.58	41.3981	52.41	10.8712	190.41
K03/1/B	K3	K3/1	B	river pocket water	river pocket water	river	2008	9	10	10.01. Anacaena limbata	sb	-	8	8	4	6.5	5.85	16.3	145.5	3	1.5	0.6	0.01	19.8	155	6.2	0.0467	100	10.6126	1.90196	1.7384	26.8143	10.122	43.9226	3.67307	1.21501	3.35575	96.6442	1.24667	1.66303	1745.4	2.88171	482.1	0.795961	199.58	41.3981	52.41	10.8712	190.41
K03/1/B	K3	K3/1	B	river pocket water	river pocket water	river	2008	9	10	10.13. Laccobius minutus	sa	-	7	7	4	6.5	5.85	16.3	145.5	3	1.5	0.6	0.01	19.8	155	6.2	0.0467	100	10.6126	1.90196	1.7384	26.8143	10.122	43.9226	3.67307	1.21501	3.35575	96.6442	1.24667	1.66303	1745.4	2.88171	482.1	0.795961	199.58	41.3981	52.41	10.8712	190.41
K03/1/B	K3	K3/1	B	river pocket water	river pocket water	river	2008	9	10	11.01. Hydraena palustris	sa	-	1	1	4	6.5	5.85	16.3	145.5	3	1.5	0.6	0.01	19.8	155	6.2	0.0467	100	10.6126	1.90196	1.7384	26.8143	10.122	43.9226	3.67307	1.21501	3.35575	96.6442	1.24667	1.66303	1745.4	2.88171	482.1	0.795961	199.58	41.3981	52.41	10.8712	190.41
K03/1/B	K3	K3/1	B	river pocket water	river pocket water	river	2008	9	10	11.02. Limnebius atomus	sb	-	1	1	4	6.5	5.85	16.3	145.5	3	1.5	0.6	0.01	19.8	155	6.2	0.0467	100	10.6126	1.90196	1.7384	26.8143	10.122	43.9226	3.67307	1.21501	3.35575	96.6442	1.24667	1.66303	1745.4	2.88171	482.1	0.795961	199.58	41.3981	52.41	10.8712	190.41
K03/1/B	K3	K3/1	B	river pocket water	river pocket water	river	2008	9	10	11.03. Ochthebius minimus	sb	-	1	1	4	6.5	5.85	16.3	145.5	3	1.5	0.6	0.01	19.8	155	6.2	0.0467	100	10.6126	1.90196	1.7384	26.8143	10.122	43.9226	3.67307	1.21501	3.35575	96.6442	1.24667	1.66303	1745.4	2.88171	482.1	0.795961	199.58	41.3981	52.41	10.8712	190.41
K03/1/B	K3	K3/1	B	river pocket water	river pocket, meadow	river	2008	10	13	05.01. Agabus sp.	sb	2	-	2	4	10.4	8.76	11.4	148.9	0.2	2	0.1	0	5.2	150	7.7	0.0472	100	19.7449	1.95825	2.20013	30.6163	10.2386	31.8224	2.72034	0.699139	3.50257	96.4974	1.54667	1.33303	1745.4	2.88171	482.1	0.795961	199.58	41.3981	52.41	10.8712	190.41
K03/1/B	K3	K3/1	B	river pocket water	river pocket, meadow	river	2008	10	13	06.01. Helophorus griseus	sa	-	3	3	4	10.4	8.76	11.4	148.9	0.2	2	0.1	0	5.2	150	7.7	0.0472	100	19.7449	1.95825	2.20013	30.6163	10.2386	31.8224	2.72034	0.699139	3.50257	96.4974	1.54667	1.33303	1745.4	2.88171	482.1	0.795961	199.58	41.3981	52.41	10.8712	190.41
K03/1/B	K3	K3/1	B	river pocket water	river pocket, meadow	river	2008	10	13	10.01. Anacaena limbata	sb	-	1	1	4	10.4	8.76	11.4	148.9	0.2	2	0.1	0	5.2	150	7.7	0.0472	100	19.7449	1.95825	2.20013	30.6163	10.2386	31.8224	2.72034	0.699139	3.50257	96.4974	1.54667	1.33303	1745.4	2.88171	482.1	0.795961	199.58	41.3981	52.41	10.8712	190.41
K03/1/B	K3	K3/1	B	river pocket water	river pocket, meadow	river	2008	10	13	10.07. Enochrus melanocephalus	sa	-	1	1	4	10.4	8.76	11.4	148.9	0.2	2	0.1	0	5.2	150	7.7	0.0472	100	19.7449	1.95825	2.20013	30.6163	10.2386	31.8224	2.72034	0.699139	3.50257	96.4974	1.54667	1.33303	1745.4	2.88171	482.1	0.795961	199.58	41.3981	52.41	10.8712	190.41
K03/1/B	K3	K3/1	B	river pocket water	river pocket, meadow	river	2008	10	13	10.13. Laccobius minutus	sa	-	2	2	4	10.4	8.76	11.4	148.9	0.2	2	0.1	0	5.2	150	7.7	0.0472	100	19.7449	1.95825	2.20013	30.6163	10.2386	31.8224	2.72034	0.699139	3.50257	96.4974	1.54667	1.33303	1745.4	2.88171	482.1	0.795961	199.58	41.3981	52.41	10.8712	190.41
K03/1/B	K3	K3/1	B	river pocket water	river pocket, meadow	river	2008	10	13	11.01. Hydraena palustris	sa	-	2	2	4	10.4	8.76	11.4	148.9	0.2	2	0.1	0	5.2	150	7.7	0.0472	100	19.7449	1.95825	2.20013	30.6163	10.2386	31.8224	2.72034	0.699139	3.50257	96.4974	1.54667	1.33303	1745.4	2.88171	482.1	0.795961	199.58	41.3981	52.41	10.8712	190.41
K03/1/C	K3	K3/1	C	river pocket water	river pocket water	river	2008	6	2	01.02. Gyrinus substriatus	sb	-	2	2	4	4.3	6.8	18.9	135	0.8	3.4	0.7	0.08	57.9	245	6.8	0.0073	100	3.35053	1.5628	1.3534	16.3299	4.94435	70.9737	1.41544	0.0698026	7.43313	92.5669	2.12667	1.25455	1745.4	2.88171	482.1	0.795961	199.58	41.3981	52.41	10.8712	190.41
K03/1/C	K3	K3/1	C	river pocket water	river pocket water	river	2008	6	2	02.02. Haliplus flavicollis	re	-	1	1	4	4.3	6.8	18.9	135	0.8	3.4	0.7	0.08	57.9	245	6.8	0.0073	100	3.35053	1.5628	1.3534	16.3299	4.94435	70.9737	1.41544	0.0698026	7.43313	92.5669	2.12667	1.25455	1745.4	2.88171	482.1	0.795961	199.58	41.3981	52.41	10.8712	190.41
K03/1/C	K3	K3/1	C	river pocket water	river pocket water	river	2008	6	2	03.01. Noterus crassicornis	sb	-	1	1	4	4.3	6.8	18.9	135	0.8	3.4	0.7	0.08	57.9	245	6.8	0.0073	100	3.35053	1.5628	1.3534	16.3299	4.94435	70.9737	1.41544	0.0698026	7.43313	92.5669	2.12667	1.25455	1745.4	2.88171	482.1	0.795961	199.58	41.3981	52.41	10.8712	190.41
K03/1/C	K3	K3/1	C	river pocket water	river pocket water	river	2008	6	2	05.02. Ilybius fuliginosus	re	-	1	1	4	4.3	6.8	18.9	135	0.8	3.4	0.7	0.08	57.9	245	6.8	0.0073	100	3.35053	1.5628	1.3534	16.3299	4.94435	70.9737	1.41544	0.0698026	7.43313	92.5669	2.12667	1.25455	1745.4	2.88171	482.1	0.795961	199.58	41.3981	52.41	10.8712	190.41
K03/1/C	K3	K3/1	C	river pocket water	river pocket water	river	2008	6	2	05.25. Hyphydrus ovatus	sb	-	1	1	4	4.3	6.8	18.9	135	0.8	3.4	0.7	0.08	57.9	245	6.8	0.0073	100	3.35053	1.5628	1.3534	16.3299	4.94435	70.9737	1.41544	0.0698026	7.43313	92.5669	2.12667	1.25455	1745.4	2.88171	482.1	0.795961	199.58	41.3981	52.41	10.8712	190.41
K03/1/C	K3	K3/1	C	river pocket water	river pocket water	river	2008	6	2	10.01. Anacaena limbata	sb	-	1	1	4	4.3	6.8	18.9	135	0.8	3.4	0.7	0.08	57.9	245	6.8	0.0073	100	3.35053	1.5628	1.3534	16.3299	4.94435	70.9737	1.41544	0.0698026	7.43313	92.5669	2.12667	1.25455	1745.4	2.88171	482.1	0.795961	199.58	41.3981	52.41	10.8712	190.41
K03/1/C	K3	K3/1	C	river pocket water	river pocket water	river	2008	6	2	10.13. Laccobius minutus	sa	-	4	4	4	4.3	6.8	18.9	135	0.8	3.4	0.7	0.08	57.9	245	6.8	0.0073	100	3.35053	1.5628	1.3534	16.3299	4.94435	70.9737	1.41544	0.0698026	7.43313	92.5669	2.12667	1.25455	1745.4	2.88171	482.1	0.795961	199.58	41.3981	52.41	10.8712	190.41
K03/1/C	K3	K3/1	C	river pocket water	river pocket water	river	2008	6	2	10.13. Laccobius minutus	sa	-	1	1	4	4.3	6.8	18.9	135	0.8	3.4	0.7	0.08	57.9	245	6.8	0.0073	100	3.35053	1.5628	1.3534	16.3299	4.94435	70.9737	1.41544	0.0698026	7.43313	92.5669	2.12667	1.25455	1745.4	2.88171	482.1	0.795961	199.58	41.3981	52.41	10.8712	190.41
K03/1/C	K3	K3/1	C	river pocket water	river pocket water	river	2008	7	8	05.02. Ilybius fuliginosus	re	-	3	3	4	8.9	7.76	18.4	184	0.6	1.1	0.1	0.03	40.3	347	5	0.0056	100	3.35053	1.5628	1.3534	16.3299	4.94435	70.9737	1.41544	0.0698026	1.1333	98.8667	2.12667	1.25455	1745.4	2.88171	482.1	0.795961	199.58	41.3981	52.41	10.8712	190.41
K03/1/C	K3	K3/1	C	river pocket water	river pocket water	river	2008	7	8	10.09. Hydrobius fuscipes	sb	-	4	4	4	8.9	7.76	18.4	184	0.6	1.1	0.1	0.03	40.3	347	5	0.0056	100	3.35053	1.5628	1.3534	16.3299	4.94435	70.9737	1.41544	0.0698026	1.1333	98.8667	2.12667	1.25455	1745.4	2.88171	482.1	0.795961	199.58	41.3981	52.41	10.8712	190.41
K03/1/C	K3	K3/1	C	river pocket water	river pocket water	river	2008	7	8	10.13. Laccobius minutus	sa	-	1	1	4	8.9	7.76	18.4	184	0.6	1.1	0.1	0.03	40.3	347	5	0.0056	100	3.35053	1.5628	1.3534	16.3299	4.94435	70.9737	1.41544	0.0698026	1.1333	98.8667	2.12667	1.25455	1745.4	2.88171	482.1	0.795961	199.58	41.3981	52.41	10.8712	190.41
K03/1/C	K3	K3/1	C	river pocket water	river pocket water	river	2008	8	5	05.01. Agabus bipustulatus	sb	-	1	1	4	10.4	7.24	21.1	155.5	0.3	1.2	0.1	0.04	36	47	8.6	0.0068	100	12.02	2.46419	1.73982	27.6122	10.7102	41.2	1.84236	2.41127	3.35575	96.6442	1.13333	1.74803	1745.4	2.88171	482.1	0.795961	199.58	41.3981	52.41	10.8712	190.41
K03/1/C	K3	K3/1	C	river pocket water	river pocket water	river	2008	8	5	05.02. Ilybius fenestratus	re	-	1	1	4	10.4	7.24	21.1	155.5	0.3	1.2	0.1	0.04	36	47	8.6	0.0068	100	12.02	2.46419	1.73982	27.6122	10.7102	41.2	1.84236	2.41127	3.35575	96.6442	1.13333	1.74803	1745.4	2.88171	482.1	0.795961	199.58	41.3981	52.41	10.8712	190.41
K03/1/C	K3	K3/1	C	river pocket water	river pocket water	river	2008	8	5	05.02. Ilybius fuliginosus	re	-	2	2	4	10.4	7.24	21.1	155.5	0.3	1.2	0.1	0.04	36	47	8.6	0.0068	100	12.02	2.46419	1.73982	27.6122	10.7102	41.2	1.84236	2.41127	3.35575	96.6442	1.13333	1.74803	1745.4	2.88171	482.1	0.795961	199.58	41.3981	52.41	10.8712	190.41
K03/1/C	K3	K3/1	C	river pocket water	river pocket water	river	2008	8	5	10.09. Hydrobius fuscipes	sb	-	1	1	4	10.4	7.24	21.1	155.5	0.3	1.2	0.1	0.04	36	47	8.6	0.0068	100	12.02	2.46419	1.73982	27.6122	10.7102	41.2	1.84236	2.41127	3.35575	96.6442	1.13333	1.74803	1745.4	2.88171	482.1	0.795961	199.58	41.3981	52.41	10.8712	190.41
K03/1/C	K3	K3/1	C	river pocket water	river pocket water	river	2008	8	5	10.13. Laccobius minutus	sa	-	3	3	4	10.4	7.24	21.1	155.5	0.3	1.2	0.1	0.04	36	47	8.6	0.0068	100	12.02	2.46419	1.73982	27.6122	10.7102	41.2	1.84236	2.41127	3.35575	96.6442	1.13333	1.74803	1745.4	2.88171	482.1	0.795961	199.58	41.3981	52.41	10.8712	190.41
K03/2/A	K3	K3/2	A	river current	river current, plants	river	2008	5	6	01.02. Gyrinus substriatus	sb	-	1	1	3	11.1	8.3	18.5	111	2	0.4	0.1	0.04	23	133	7.1	0.9039	100	3.35053	1.5628	1.3534	16.3299	4.94435	70.9737	1.41544	0.0698026	3.46223	96.5378	2.12667	1.25455	1745.4	2.88171	482.1	0.795961	199.58	41.3981	52.41	10.8712	190.41
K03/3/A	K3	K3/3	A	river current	river current sand	river	2008	7	8	10.09. Hydrobius fuscipes	sb	-	1	1	0	8.9	7.76	18.4	184	0.6	1.1	0.1	0.03	40.3	347	5	0.0875	100	36.4955	1.32843	1.15082	17.9923	8.06063	34.1889	0.406316	0.37712	1.1574	98.8426	1.54667	1.33303	1745.4	2.88171	482.1	0.795961	199.58	41.3981	52.41	10.8712	190.41
K03/3/A	K3	K3/3	A	river current	river current	river	2008	8	5	05.01. Agabus bipustulatus	sb	-	1	1	0	10.4	7.24	21.1	155.5	0.3	1.2	0.1	0.04	36	47	8.6	0.2699	100	3.94534	2.78914	2.43628	22.7749	10.3157	54.3189	2.63899	0.78081	2.03061	97.9694	1.24667	1.96606	1745.4	2.88171	482.1	0.795961	199.58	41.3981	52.41	10.8712	190.41
K03/3/A	K3	K3/3	A	river current	river current	river	2008	8	5	05.02. Ilybius fuliginosus	re	-	1	1	0	10.4	7.24	21.1	155.5	0.3	1.2	0.1	0.04	36	47	8.6	0.2699	100	3.94534	2.78914	2.43628	22.7749	10.3157	54.3189	2.63899	0.78081	2.03061	97.9694	1.24667	1.96606	1745.4	2.88171	482.1	0.795961	199.58	41.3981	52.41	10.8712	190.41
K03/3/A	K3	K3/3	A	river current	river current sand	river	2008	9	10	05.02. Ilybius fuliginosus	re	-	2	2	0	6.5	5.85	16.3	145.5	0.4	1.3	0.1	0.07	46	51	6.2	0.1987	100	2.30419	2.33072	1.79116	40.1	7.96515	44.6862	0.716465	0.106143	1.5065	98.4935	1.10667	1.91455	1745.4	2.88171	482.1	0.795961	199.58	41.3981	52.41	10.8712	190.41
K03/3/B	K3	K3/3	B	river current	river current sand	river	2008	4	15	10.01. Anacaena limbata	sb	-	1	1	0	9.4	7.7	11.2	274	0.8	0.6	2.5	0.01	78.9	85	6.4	0.1549	100	26.7901	3.76522	1.0643	19.4277	10.5139	37.8641	0.245981	0.328787	1.1574	98.8426	1.54667	1.33303	1745.4	2.88171	482.1	0.795961	199.58	41.3981	52.41	10.8712	190.41
K03/3/B	K3	K3/3	B	river current	river current sand	river	2008	9	10	05.02. Ilybius fuliginosus	re	-	1	1	0	6.5	5.85	16.3	145.5	0.4	1.3	0.1	0.07	46	51	6.2	0.1987	100	2.30419	2.33072	1.79116	40.1	7.96515	44.6862	0.716465	0.106143	1.5065	98.4935	1.10667	1.91455	1745.4	2.88171	482.1	0.795961	199.58	41.3981	52.41	10.8712	190.41
K03/3/C	K3	K3/3	C	river current	river current sand	river	2008	10	13	01.02. Gyrinus substriatus	sb	-	1	1	0	10.4	8.76	11.4	148.9	0.2	2	0.1	0	5.2	150	7.7	0.1394	100	16.7242	1.91144	1.95969	28.8015	9.57577	39.1419	1.351	0.534462	2.85034	97.1497	1.54667	1.33303	1745.4	2.88171	482.1	0.795961	199.58	41.3981	52.41	10.8712	190.41
K06/8/B	K6	K6/8	B	river current	river current Berula, Callitriche	river	2008	6	3	11.01. Hydraena palustris	sa	-	1	1	5	7.5	7.3	18.4	248	0.3	4	0.2	0.05	43	196	3.9	0.0019	100	3.46657	5.44747	7.81747	56.5971	5.44747	14.9275	3.53732	2.75911	55.395	44.605	0.58	1.57106	13997.6	23.1104	11065.1	18.2688	4067.95	36.7638	1787.2	16.1517	4813.03
K06/8/B	K6	K6/8	B	river current	river current Berula, Callitriche	river	2008	6	3	02.02. Haliplus fluviatilis	re	-	2	2	5	7.5	7.3	18.4	248	0.3	4	0.2	0.05	43	196	3.9	0.0019	100	3.46657	5.44747	7.81747	56.5971	5.44747	14.9275	3.53732	2.75911	55.395	44.605	0.58	1.57106	13997.6	23.1104	11065.1	18.2688	4067.95	36.7638	1787.2	16.1517	4813.03
K06/8/B	K6	K6/8	B	river current	river current Berula, Callitriche	river	2008	6	3	05.10. Dytiscus marginalis	sb	3	-	3	5	7.5	7.3	18.4	248	0.3	4	0.2	0.05	43	196	3.9	0.0019	100	3.46657	5.44747	7.81747	56.5971	5.44747	14.9275	3.53732	2.75911	55.395	44.605	0.58	1.57106	13997.6	23.1104	11065.1	18.2688	4067.95	36.7638	1787.2	16.1517	4813.03
K06/3/A	K6	K6/3	A	river current	river current, nympheids	river	2008	7	8	05.03. Platambus maculatus	re	-	1	1	3	8.5	7.63	17.4	302	0.4	4.2	0.2	0.04	48	176	3.8	0.0018	100	0.776332	0.419639	0.75535	29.3957	6.2736	35.3336	22.4717	4.57407	34.1376	65.8624	1.52667	2.2003	13997.6	23.1104	11065.1	18.2688	4067.95	36.7638	1787.2	16.1517	4813.03
K06/3/A	K6	K6/3	A	river current	river current, nympheids	river	2008	7	8	05.16. Hydroporus incognitus	sa	-	1	1	3	8.5	7.63	17.4	302	0.4	4.2	0.2	0.04	48	176	3.8	0.0018	100	0.776332	0.419639	0.75535	29.3957	6.2736	35.3336	22.4717	4.57407	34.1376	65.8624	1.52667	2.2003	13997.6	23.1104	11065.1	18.2688	4067.95	36.7638	1787.2	16.1517	4813.03
K06/3/A	K6	K6/3	A	river current	river current, nympheids	river	2008	7	8	05.22. Suphrodytes figuratus	sb	-	1	1	3	8.5	7.63	17.4	302	0.4	4.2	0.2	0.04	48	176	3.8	0.0018	100	0.776332	0.419639	0.75535	29.3957	6.2736	35.3336	22.4717	4.57407	34.1376	65.8624	1.52667	2.2003	13997.6	23.1104	11065.1	18.2688	4067.95	36.7638	1787.2	16.1517	4813.03
K06/3/A	K6	K6/3	A	river current	river current, nympheids	river	2008	7	8	06.01. Helophorus granularis	sa	-	1	1	3	8.5	7.63	17.4	302	0.4	4.2	0.2	0.04	48	176	3.8	0.0018	100	0.776332	0.419639	0.75535	29.3957	6.2736	35.3336	22.4717	4.57407	34.1376	65.8624	1.52667	2.2003	13997.6	23.1104	11065.1	18.2688	4067.95	36.7638	1787.2	16.1517	4813.03
K06/3/A	K6	K6/3	A	river current	river current, nympheids	river	2008	7	8	11.01. Hydraena palustris	sa	-	1	1	3	8.5	7.63	17.4	302	0.4	4.2	0.2	0.04	48	176	3.8	0.0018	100	0.776332	0.419639	0.75535	29.3957	6.2736	35.3336	22.4717	4.57407	34.1376	65.8624	1.52667	2.2003	13997.6	23.1104	11065.1	18.2688	4067.95	36.7638	1787.2	16.1517	4813.03
K06/3/A	K6	K6/3	A	river current	nympheids	river	2008	8	6	02.02. Haliplus fluviatilis	re	-	3	3	3	8.7	5.75	15.9	261	1.2	3.9	0.4	0.01	3.7	166	4.4	0.0018	100	0.776332	0.419639	0.75535	29.3957	6.2736	35.3336	22.4717	4.57407	34.1376	65.8624	1.52667	2.2003	13997.6	23.1104	11065.1	18.2688	4067.95	36.7638	1787.2	16.1517	4813.03
K06/3/A	K6	K6/3	A	river current	nympheids	river	2008	8	6	05.01. Agabus bipustulatus	sb	-	1	1	3	8.7	5.75	15.9	261	1.2	3.9	0.4	0.01	3.7	166	4.4	0.0018	100	0.776332	0.419639	0.75535	29.3957	6.2736	35.3336	22.4717	4.57407	34.1376	65.8624	1.52667	2.2003	13997.6	23.1104	11065.1	18.2688	4067.95	36.7638	1787.2	16.1517	4813.03
K06/3/A	K6	K6/3	A	river current	nympheids	river	2008	8	6	05.02. Ilybius ater	sa	-	1	1	3	8.7	5.75	15.9	261	1.2	3.9	0.4	0.01	3.7	166	4.4	0.0018	100	0.776332	0.419639	0.75535	29.3957	6.2736	35.3336	22.4717	4.57407	34.1376	65.8624	1.52667	2.2003	13997.6	23.1104	11065.1	18.2688	4067.95	36.7638	1787.2	16.1517	4813.03
K06/3/A	K6	K6/3	A	river current	nympheids	river	2008	8	6	05.02. Ilybius fuliginosus	re	-	2	2	3	8.7	5.75	15.9	261	1.2	3.9	0.4	0.01	3.7	166	4.4	0.0018	100	0.776332	0.419639	0.75535	29.3957	6.2736	35.3336	22.4717	4.57407	34.1376	65.8624	1.52667	2.2003	13997.6	23.1104	11065.1	18.2688	4067.95	36.7638	1787.2	16.1517	4813.03
K06/3/A	K6	K6/3	A	river current	nympheids	river	2008	8	6	05.25. Hyphydrus ovatus	sb	1	1	2	3	8.7	5.75	15.9	261	1.2	3.9	0.4	0.01	3.7	166	4.4	0.0018	100	0.776332	0.419639	0.75535	29.3957	6.2736	35.3336	22.4717	4.57407	34.1376	65.8624	1.52667	2.2003	13997.6	23.1104	11065.1	18.2688	4067.95	36.7638	1787.2	16.1517	4813.03
K06/3/A	K6	K6/3	A	river current	nympheids	river	2008	8	6	06.01. Helophorus granularis	sa	-	1	1	3	8.7	5.75	15.9	261	1.2	3.9	0.4	0.01	3.7	166	4.4	0.0018	100	0.776332	0.419639	0.75535	29.3957	6.2736	35.3336	22.4717	4.57407	34.1376	65.8624	1.52667	2.2003	13997.6	23.1104	11065.1	18.2688	4067.95	36.7638	1787.2	16.1517	4813.03
K06/3/A	K6	K6/3	A	river current	nympheids	river	2008	8	6	11.01. Hydraena palustris	sa	-	3	3	3	8.7	5.75	15.9	261	1.2	3.9	0.4	0.01	3.7	166	4.4	0.0018	100	0.776332	0.419639	0.75535	29.3957	6.2736	35.3336	22.4717	4.57407	34.1376	65.8624	1.52667	2.2003	13997.6	23.1104	11065.1	18.2688	4067.95	36.7638	1787.2	16.1517	4813.03
K06/3/A	K6	K6/3	A	river current	nympheids	river	2008	9	11	05.01. Agabus bipustulatus	sb	-	1	1	3	2.6	7.04	14.3	203	0.2	1.5	0.2	0.01	0	200	3.8	0.0017	100	1.08021	0.666513	0.71248	30.0621	5.8837	34.1761	22.7304	4.68858	34.1376	65.8624	1.24667	1.9903	13997.6	23.1104	11065.1	18.2688	4067.95	36.7638	1787.2	16.1517	4813.03
K06/3/A	K6	K6/3	A	river current	nympheids	river	2008	9	11	05.02. Ilybius fuliginosus	re	-	1	1	3	2.6	7.04	14.3	203	0.2	1.5	0.2	0.01	0	200	3.8	0.0017	100	1.08021	0.666513	0.71248	30.0621	5.8837	34.1761	22.7304	4.68858	34.1376	65.8624	1.24667	1.9903	13997.6	23.1104	11065.1	18.2688	4067.95	36.7638	1787.2	16.1517	4813.03
K06/3/A	K6	K6/3	A	river current	nympheids	river	2008	9	11	05.04. Colymbetes paykulli	sa	-	1	1	3	2.6	7.04	14.3	203	0.2	1.5	0.2	0.01	0	200	3.8	0.0017	100	1.08021	0.666513	0.71248	30.0621	5.8837	34.1761	22.7304	4.68858	34.1376	65.8624	1.24667	1.9903	13997.6	23.1104	11065.1	18.2688	4067.95	36.7638	1787.2	16.1517	4813.03
K06/3/A	K6	K6/3	A	river current	nympheids	river	2008	9	11	05.07. Acilius canaliculatus	sa	-	1	1	3	2.6	7.04	14.3	203	0.2	1.5	0.2	0.01	0	200	3.8	0.0017	100	1.08021	0.666513	0.71248	30.0621	5.8837	34.1761	22.7304	4.68858	34.1376	65.8624	1.24667	1.9903	13997.6	23.1104	11065.1	18.2688	4067.95	36.7638	1787.2	16.1517	4813.03
K06/3/B	K6	K6/3	B	river current	nympheids	river	2008	5	5	06.01. Helophorus granularis	sa	-	1	1	3	5.4	6.77	13.7	243	0.5	0.5	0.5	0.07	4.8	223	3.9	0.002	100	0.7298	2.08514	0.451781	30.2172	6.18593	36.768	19.8436	3.71851	32.6523	67.3477	1.24667	1.9903	13997.6	23.1104	11065.1	18.2688	4067.95	36.7638	1787.2	16.1517	4813.03
K06/3/B	K6	K6/3	B	river current	river current, nympheids	river	2008	7	8	05.16. Hydroporus obscurus	sa	-	1	1	3	8.5	7.63	17.4	302	0.4	4.2	0.2	0.04	48	176	3.8	0.0018	100	0.776332	0.419639	0.75535	29.3957	6.2736	35.3336	22.4717	4.57407	34.1376	65.8624	1.52667	2.2003	13997.6	23.1104	11065.1	18.2688	4067.95	36.7638	1787.2	16.1517	4813.03
K06/3/B	K6	K6/3	B	river current	river current, nympheids	river	2008	7	8	06.01. Helophorus granularis	sa	-	1	1	3	8.5	7.63	17.4	302	0.4	4.2	0.2	0.04	48	176	3.8	0.0018	100	0.776332	0.419639	0.75535	29.3957	6.2736	35.3336	22.4717	4.57407	34.1376	65.8624	1.52667	2.2003	13997.6	23.1104	11065.1	18.2688	4067.95	36.7638	1787.2	16.1517	4813.03
K06/3/B	K6	K6/3	B	river current	river current, nympheids	river	2008	7	8	11.01. Hydraena palustris	sa	-	1	1	3	8.5	7.63	17.4	302	0.4	4.2	0.2	0.04	48	176	3.8	0.0018	100	0.776332	0.419639	0.75535	29.3957	6.2736	35.3336	22.4717	4.57407	34.1376	65.8624	1.52667	2.2003	13997.6	23.1104	11065.1	18.2688	4067.95	36.7638	1787.2	16.1517	4813.03
K06/3/B	K6	K6/3	B	river current	nympheids	river	2008	8	6	05.01. Agabus didymus	kr	-	1	1	3	8.7	5.75	15.9	261	1.2	3.9	0.4	0.01	3.7	166	4.4	0.0018	100	0.776332	0.419639	0.75535	29.3957	6.2736	35.3336	22.4717	4.57407	34.1376	65.8624	1.52667	2.2003	13997.6	23.1104	11065.1	18.2688	4067.95	36.7638	1787.2	16.1517	4813.03
K06/3/B	K6	K6/3	B	river current	nympheids	river	2008	8	6	05.02. Ilybius fuliginosus	re	-	1	1	3	8.7	5.75	15.9	261	1.2	3.9	0.4	0.01	3.7	166	4.4	0.0018	100	0.776332	0.419639	0.75535	29.3957	6.2736	35.3336	22.4717	4.57407	34.1376	65.8624	1.52667	2.2003	13997.6	23.1104	11065.1	18.2688	4067.95	36.7638	1787.2	16.1517	4813.03
K06/3/B	K6	K6/3	B	river current	nympheids	river	2008	8	6	05.07. Acilius canaliculatus	sa	-	1	1	3	8.7	5.75	15.9	261	1.2	3.9	0.4	0.01	3.7	166	4.4	0.0018	100	0.776332	0.419639	0.75535	29.3957	6.2736	35.3336	22.4717	4.57407	34.1376	65.8624	1.52667	2.2003	13997.6	23.1104	11065.1	18.2688	4067.95	36.7638	1787.2	16.1517	4813.03
K06/3/B	K6	K6/3	B	river current	nympheids	river	2008	8	6	11.01. Hydraena palustris	sa	-	1	1	3	8.7	5.75	15.9	261	1.2	3.9	0.4	0.01	3.7	166	4.4	0.0018	100	0.776332	0.419639	0.75535	29.3957	6.2736	35.3336	22.4717	4.57407	34.1376	65.8624	1.52667	2.2003	13997.6	23.1104	11065.1	18.2688	4067.95	36.7638	1787.2	16.1517	4813.03
K06/3/B	K6	K6/3	B	river current	nympheids	river	2008	10	14	05.04. Colymbetes fuscus	sb	-	1	1	3	3.9	7.23	11	273	0.5	3.9	0.4	0	9.5	231	5.2	0.0018	100	1.08021	0.666513	0.71248	30.0621	5.8837	34.1761	22.7304	4.68858	34.1376	65.8624	1.24667	1.9903	13997.6	23.1104	11065.1	18.2688	4067.95	36.7638	1787.2	16.1517	4813.03
K06/3/B	K6	K6/3	B	river current	nympheids	river	2008	10	14	05.16. Hydroporus incognitus	sa	-	1	1	3	3.9	7.23	11	273	0.5	3.9	0.4	0	9.5	231	5.2	0.0018	100	1.08021	0.666513	0.71248	30.0621	5.8837	34.1761	22.7304	4.68858	34.1376	65.8624	1.24667	1.9903	13997.6	23.1104	11065.1	18.2688	4067.95	36.7638	1787.2	16.1517	4813.03
K06/3/B	K6	K6/3	B	river current	nympheids	river	2008	10	14	11.01. Hydraena palustris	sa	-	1	1	3	3.9	7.23	11	273	0.5	3.9	0.4	0	9.5	231	5.2	0.0018	100	1.08021	0.666513	0.71248	30.0621	5.8837	34.1761	22.7304	4.68858	34.1376	65.8624	1.24667	1.9903	13997.6	23.1104	11065.1	18.2688	4067.95	36.7638	1787.2	16.1517	4813.03
K06/3/C	K6	K6/3	C	river current	river current, nympheids	river	2008	7	8	05.02. Ilybius fuliginosus	re	-	1	1	3	8.5	7.63	17.4	302	0.4	4.2	0.2	0.04	48	176	3.8	0.0018	100	0.776332	0.419639	0.75535	29.3957	6.2736	35.3336	22.4717	4.57407	34.1376	65.8624	1.52667	2.2003	13997.6	23.1104	11065.1	18.2688	4067.95	36.7638	1787.2	16.1517	4813.03
K06/3/C	K6	K6/3	C	river current	river current, nympheids	river	2008	7	8	05.03. Platambus maculatus	re	-	1	1	3	8.5	7.63	17.4	302	0.4	4.2	0.2	0.04	48	176	3.8	0.0018	100	0.776332	0.419639	0.75535	29.3957	6.2736	35.3336	22.4717	4.57407	34.1376	65.8624	1.52667	2.2003	13997.6	23.1104	11065.1	18.2688	4067.95	36.7638	1787.2	16.1517	4813.03
K06/3/C	K6	K6/3	C	river current	river current, nympheids	river	2008	7	8	05.16. Hydroporus incognitus	sa	-	3	3	3	8.5	7.63	17.4	302	0.4	4.2	0.2	0.04	48	176	3.8	0.0018	100	0.776332	0.419639	0.75535	29.3957	6.2736	35.3336	22.4717	4.57407	34.1376	65.8624	1.52667	2.2003	13997.6	23.1104	11065.1	18.2688	4067.95	36.7638	1787.2	16.1517	4813.03
K06/3/C	K6	K6/3	C	river current	river current, nympheids	river	2008	7	8	05.25. Hyphydrus ovatus	sb	3	-	3	3	8.5	7.63	17.4	302	0.4	4.2	0.2	0.04	48	176	3.8	0.0018	100	0.776332	0.419639	0.75535	29.3957	6.2736	35.3336	22.4717	4.57407	34.1376	65.8624	1.52667	2.2003	13997.6	23.1104	11065.1	18.2688	4067.95	36.7638	1787.2	16.1517	4813.03
K06/3/C	K6	K6/3	C	river current	river current, nympheids	river	2008	7	8	06.01. Helophorus granularis	sa	-	1	1	3	8.5	7.63	17.4	302	0.4	4.2	0.2	0.04	48	176	3.8	0.0018	100	0.776332	0.419639	0.75535	29.3957	6.2736	35.3336	22.4717	4.57407	34.1376	65.8624	1.52667	2.2003	13997.6	23.1104	11065.1	18.2688	4067.95	36.7638	1787.2	16.1517	4813.03
K06/3/C	K6	K6/3	C	river current	river current, nympheids	river	2008	7	8	10.07. Enochrus testaceus	sb	-	1	1	3	8.5	7.63	17.4	302	0.4	4.2	0.2	0.04	48	176	3.8	0.0018	100	0.776332	0.419639	0.75535	29.3957	6.2736	35.3336	22.4717	4.57407	34.1376	65.8624	1.52667	2.2003	13997.6	23.1104	11065.1	18.2688	4067.95	36.7638	1787.2	16.1517	4813.03
K06/3/C	K6	K6/3	C	river current	river current, nympheids	river	2008	7	8	11.01. Hydraena palustris	sa	-	2	2	3	8.5	7.63	17.4	302	0.4	4.2	0.2	0.04	48	176	3.8	0.0018	100	0.776332	0.419639	0.75535	29.3957	6.2736	35.3336	22.4717	4.57407	34.1376	65.8624	1.52667	2.2003	13997.6	23.1104	11065.1	18.2688	4067.95	36.7638	1787.2	16.1517	4813.03
K06/3/C	K6	K6/3	C	river current	nympheids	river	2008	8	6	02.02. Haliplus fluviatilis	re	-	1	1	3	8.7	5.75	15.9	261	1.2	3.9	0.4	0.01	3.7	166	4.4	0.0018	100	0.776332	0.419639	0.75535	29.3957	6.2736	35.3336	22.4717	4.57407	34.1376	65.8624	1.52667	2.2003	13997.6	23.1104	11065.1	18.2688	4067.95	36.7638	1787.2	16.1517	4813.03
K06/3/C	K6	K6/3	C	river current	nympheids	river	2008	8	6	05.02. Ilybius fuliginosus	re	-	2	2	3	8.7	5.75	15.9	261	1.2	3.9	0.4	0.01	3.7	166	4.4	0.0018	100	0.776332	0.419639	0.75535	29.3957	6.2736	35.3336	22.4717	4.57407	34.1376	65.8624	1.52667	2.2003	13997.6	23.1104	11065.1	18.2688	4067.95	36.7638	1787.2	16.1517	4813.03
K06/3/C	K6	K6/3	C	river current	nympheids	river	2008	8	6	05.25. Hyphydrus ovatus	sb	-	2	2	3	8.7	5.75	15.9	261	1.2	3.9	0.4	0.01	3.7	166	4.4	0.0018	100	0.776332	0.419639	0.75535	29.3957	6.2736	35.3336	22.4717	4.57407	34.1376	65.8624	1.52667	2.2003	13997.6	23.1104	11065.1	18.2688	4067.95	36.7638	1787.2	16.1517	4813.03
K06/3/C	K6	K6/3	C	river current	nympheids	river	2008	8	6	11.01. Hydraena palustris	sa	-	1	1	3	8.7	5.75	15.9	261	1.2	3.9	0.4	0.01	3.7	166	4.4	0.0018	100	0.776332	0.419639	0.75535	29.3957	6.2736	35.3336	22.4717	4.57407	34.1376	65.8624	1.52667	2.2003	13997.6	23.1104	11065.1	18.2688	4067.95	36.7638	1787.2	16.1517	4813.03
K06/3/C	K6	K6/3	C	river current	nympheids	river	2008	9	11	05.02. Ilybius fuliginosus	re	-	1	1	3	2.6	7.04	14.3	203	0.2	1.5	0.2	0.01	0	200	3.8	0.0017	100	1.08021	0.666513	0.71248	30.0621	5.8837	34.1761	22.7304	4.68858	34.1376	65.8624	1.24667	1.9903	13997.6	23.1104	11065.1	18.2688	4067.95	36.7638	1787.2	16.1517	4813.03
K06/3/C	K6	K6/3	C	river current	nympheids	river	2008	9	11	05.02. Ilybius quadriguttatus	sa	-	1	1	3	2.6	7.04	14.3	203	0.2	1.5	0.2	0.01	0	200	3.8	0.0017	100	1.08021	0.666513	0.71248	30.0621	5.8837	34.1761	22.7304	4.68858	34.1376	65.8624	1.24667	1.9903	13997.6	23.1104	11065.1	18.2688	4067.95	36.7638	1787.2	16.1517	4813.03
K06/3/C	K6	K6/3	C	river current	nympheids	river	2008	9	11	05.04. Colymbetes fuscus	sb	-	1	1	3	2.6	7.04	14.3	203	0.2	1.5	0.2	0.01	0	200	3.8	0.0017	100	1.08021	0.666513	0.71248	30.0621	5.8837	34.1761	22.7304	4.68858	34.1376	65.8624	1.24667	1.9903	13997.6	23.1104	11065.1	18.2688	4067.95	36.7638	1787.2	16.1517	4813.03
K06/3/C	K6	K6/3	C	river current	nympheids	river	2008	9	11	05.04. Colymbetes striatus	sa	-	1	1	3	2.6	7.04	14.3	203	0.2	1.5	0.2	0.01	0	200	3.8	0.0017	100	1.08021	0.666513	0.71248	30.0621	5.8837	34.1761	22.7304	4.68858	34.1376	65.8624	1.24667	1.9903	13997.6	23.1104	11065.1	18.2688	4067.95	36.7638	1787.2	16.1517	4813.03
K06/3/C	K6	K6/3	C	river current	nympheids	river	2008	9	11	05.07. Acilius canaliculatus	sa	-	1	1	3	2.6	7.04	14.3	203	0.2	1.5	0.2	0.01	0	200	3.8	0.0017	100	1.08021	0.666513	0.71248	30.0621	5.8837	34.1761	22.7304	4.68858	34.1376	65.8624	1.24667	1.9903	13997.6	23.1104	11065.1	18.2688	4067.95	36.7638	1787.2	16.1517	4813.03
K06/3/C	K6	K6/3	C	river current	nympheids	river	2008	9	11	05.07. Acilius sulcatus	sb	-	1	1	3	2.6	7.04	14.3	203	0.2	1.5	0.2	0.01	0	200	3.8	0.0017	100	1.08021	0.666513	0.71248	30.0621	5.8837	34.1761	22.7304	4.68858	34.1376	65.8624	1.24667	1.9903	13997.6	23.1104	11065.1	18.2688	4067.95	36.7638	1787.2	16.1517	4813.03
K06/3/C	K6	K6/3	C	river current	nympheids	river	2008	9	11	05.16. Hydroporus obscurus	sa	-	2	2	3	2.6	7.04	14.3	203	0.2	1.5	0.2	0.01	0	200	3.8	0.0017	100	1.08021	0.666513	0.71248	30.0621	5.8837	34.1761	22.7304	4.68858	34.1376	65.8624	1.24667	1.9903	13997.6	23.1104	11065.1	18.2688	4067.95	36.7638	1787.2	16.1517	4813.03
K06/3/C	K6	K6/3	C	river current	nympheids	river	2008	9	11	11.01. Hydraena palustris	sa	-	3	3	3	2.6	7.04	14.3	203	0.2	1.5	0.2	0.01	0	200	3.8	0.0017	100	1.08021	0.666513	0.71248	30.0621	5.8837	34.1761	22.7304	4.68858	34.1376	65.8624	1.24667	1.9903	13997.6	23.1104	11065.1	18.2688	4067.95	36.7638	1787.2	16.1517	4813.03
K06/5/A	K6	K6/5	A	river pocket water	river pocket water	river	2008	7	8	05.01. Agabus bipustulatus	sb	-	1	1	4	8.5	7.63	17.4	302	0.4	4.2	0.2	0.04	48	176	3.7	0.0018	100	21.4494	6.59981	7.79683	37.3989	2.4911	14.9143	8.63798	0.711744	49.0791	50.9209	0.666667	1.4603	13997.6	23.1104	11065.1	18.2688	4067.95	36.7638	1787.2	16.1517	4813.03
K06/5/A	K6	K6/5	A	river pocket water	river pocket water	river	2008	7	8	05.02. Ilybius fuliginosus	re	-	1	1	4	8.5	7.63	17.4	302	0.4	4.2	0.2	0.04	48	176	3.7	0.0018	100	21.4494	6.59981	7.79683	37.3989	2.4911	14.9143	8.63798	0.711744	49.0791	50.9209	0.666667	1.4603	13997.6	23.1104	11065.1	18.2688	4067.95	36.7638	1787.2	16.1517	4813.03
K06/5/A	K6	K6/5	A	river pocket water	river pocket water	river	2008	7	8	05.02. Ilybius quadriguttatus	sa	-	1	1	4	8.5	7.63	17.4	302	0.4	4.2	0.2	0.04	48	176	3.7	0.0018	100	21.4494	6.59981	7.79683	37.3989	2.4911	14.9143	8.63798	0.711744	49.0791	50.9209	0.666667	1.4603	13997.6	23.1104	11065.1	18.2688	4067.95	36.7638	1787.2	16.1517	4813.03
K06/5/A	K6	K6/5	A	river pocket water	river pocket water	river	2008	7	8	05.07. Acilius sulcatus	sb	-	1	1	4	8.5	7.63	17.4	302	0.4	4.2	0.2	0.04	48	176	3.7	0.0018	100	21.4494	6.59981	7.79683	37.3989	2.4911	14.9143	8.63798	0.711744	49.0791	50.9209	0.666667	1.4603	13997.6	23.1104	11065.1	18.2688	4067.95	36.7638	1787.2	16.1517	4813.03
K06/5/A	K6	K6/5	A	river pocket water	river pocket water	river	2008	7	8	05.19. Porhydrus lineatus	sa	-	1	1	4	8.5	7.63	17.4	302	0.4	4.2	0.2	0.04	48	176	3.7	0.0018	100	21.4494	6.59981	7.79683	37.3989	2.4911	14.9143	8.63798	0.711744	49.0791	50.9209	0.666667	1.4603	13997.6	23.1104	11065.1	18.2688	4067.95	36.7638	1787.2	16.1517	4813.03
K06/5/A	K6	K6/5	A	river pocket water	river pocket water	river	2008	7	8	05.25. Hyphydrus ovatus	sb	1	-	1	4	8.5	7.63	17.4	302	0.4	4.2	0.2	0.04	48	176	3.7	0.0018	100	21.4494	6.59981	7.79683	37.3989	2.4911	14.9143	8.63798	0.711744	49.0791	50.9209	0.666667	1.4603	13997.6	23.1104	11065.1	18.2688	4067.95	36.7638	1787.2	16.1517	4813.03
K06/5/A	K6	K6/5	A	river pocket water	river pocket water	river	2008	7	8	06.01. Helophorus granularis	sa	-	1	1	4	8.5	7.63	17.4	302	0.4	4.2	0.2	0.04	48	176	3.7	0.0018	100	21.4494	6.59981	7.79683	37.3989	2.4911	14.9143	8.63798	0.711744	49.0791	50.9209	0.666667	1.4603	13997.6	23.1104	11065.1	18.2688	4067.95	36.7638	1787.2	16.1517	4813.03
K06/5/A	K6	K6/5	A	river pocket water	river pocket water	river	2008	7	8	06.01. Helophorus griseus	sa	-	1	1	4	8.5	7.63	17.4	302	0.4	4.2	0.2	0.04	48	176	3.7	0.0018	100	21.4494	6.59981	7.79683	37.3989	2.4911	14.9143	8.63798	0.711744	49.0791	50.9209	0.666667	1.4603	13997.6	23.1104	11065.1	18.2688	4067.95	36.7638	1787.2	16.1517	4813.03
K06/5/A	K6	K6/5	A	river pocket water	river pocket water	river	2008	7	8	11.01. Hydraena palustris	sa	-	1	1	4	8.5	7.63	17.4	302	0.4	4.2	0.2	0.04	48	176	3.7	0.0018	100	21.4494	6.59981	7.79683	37.3989	2.4911	14.9143	8.63798	0.711744	49.0791	50.9209	0.666667	1.4603	13997.6	23.1104	11065.1	18.2688	4067.95	36.7638	1787.2	16.1517	4813.03
K06/5/A	K6	K6/5	A	river pocket water	river pocket water	river	2008	8	6	05.01. Agabus bipustulatus	sb	-	3	3	4	8.7	5.75	15.9	261	1.2	3.9	0.4	0.01	3.7	166	4.3	0.0035	100	21.4494	6.59981	7.79683	37.3989	2.4911	14.9143	8.63798	0.711744	49.0791	50.9209	1.54667	1.4603	13997.6	23.1104	11065.1	18.2688	4067.95	36.7638	1787.2	16.1517	4813.03
K06/5/A	K6	K6/5	A	river pocket water	river pocket water	river	2008	8	6	05.02. Ilybius ater	sa	-	1	1	4	8.7	5.75	15.9	261	1.2	3.9	0.4	0.01	3.7	166	4.3	0.0035	100	21.4494	6.59981	7.79683	37.3989	2.4911	14.9143	8.63798	0.711744	49.0791	50.9209	1.54667	1.4603	13997.6	23.1104	11065.1	18.2688	4067.95	36.7638	1787.2	16.1517	4813.03
K06/5/A	K6	K6/5	A	river pocket water	river pocket water	river	2008	8	6	05.02. Ilybius fuliginosus	re	-	6	6	4	8.7	5.75	15.9	261	1.2	3.9	0.4	0.01	3.7	166	4.3	0.0035	100	21.4494	6.59981	7.79683	37.3989	2.4911	14.9143	8.63798	0.711744	49.0791	50.9209	1.54667	1.4603	13997.6	23.1104	11065.1	18.2688	4067.95	36.7638	1787.2	16.1517	4813.03
K06/5/A	K6	K6/5	A	river pocket water	river pocket water	river	2008	8	6	05.07. Acilius canaliculatus	sa	-	1	1	4	8.7	5.75	15.9	261	1.2	3.9	0.4	0.01	3.7	166	4.3	0.0035	100	21.4494	6.59981	7.79683	37.3989	2.4911	14.9143	8.63798	0.711744	49.0791	50.9209	1.54667	1.4603	13997.6	23.1104	11065.1	18.2688	4067.95	36.7638	1787.2	16.1517	4813.03
K06/5/A	K6	K6/5	A	river pocket water	river pocket water	river	2008	8	6	10.11. Hydrochara caraboides	sb	-	1	1	4	8.7	5.75	15.9	261	1.2	3.9	0.4	0.01	3.7	166	4.3	0.0035	100	21.4494	6.59981	7.79683	37.3989	2.4911	14.9143	8.63798	0.711744	49.0791	50.9209	1.54667	1.4603	13997.6	23.1104	11065.1	18.2688	4067.95	36.7638	1787.2	16.1517	4813.03
K06/5/A	K6	K6/5	A	river pocket water	river pocket water	river	2008	8	6	11.02. Limnebius parvulus	sb	-	1	1	4	8.7	5.75	15.9	261	1.2	3.9	0.4	0.01	3.7	166	4.3	0.0035	100	21.4494	6.59981	7.79683	37.3989	2.4911	14.9143	8.63798	0.711744	49.0791	50.9209	1.54667	1.4603	13997.6	23.1104	11065.1	18.2688	4067.95	36.7638	1787.2	16.1517	4813.03
K06/5/A	K6	K6/5	A	river pocket water	river pocket water	river	2008	9	11	05.02. Ilybius ater	sa	-	1	1	4	2.6	7.04	14.3	203	0.2	1.5	0.2	0.01	0	200	5.1	0.0027	100	0	4.29248	3.73002	59.6063	4.94375	21.9953	4.30728	1.12493	37.5479	62.4521	1.10667	1.91455	13997.6	23.1104	11065.1	18.2688	4067.95	36.7638	1787.2	16.1517	4813.03
K06/5/A	K6	K6/5	A	river pocket water	river pocket water	river	2008	9	11	05.02. Ilybius fuliginosus	re	-	1	1	4	2.6	7.04	14.3	203	0.2	1.5	0.2	0.01	0	200	5.1	0.0027	100	0	4.29248	3.73002	59.6063	4.94375	21.9953	4.30728	1.12493	37.5479	62.4521	1.10667	1.91455	13997.6	23.1104	11065.1	18.2688	4067.95	36.7638	1787.2	16.1517	4813.03
K06/5/A	K6	K6/5	A	river pocket water	river pocket water	river	2008	9	11	10.01. Anacaena lutescens	sa	-	1	1	4	2.6	7.04	14.3	203	0.2	1.5	0.2	0.01	0	200	5.1	0.0027	100	0	4.29248	3.73002	59.6063	4.94375	21.9953	4.30728	1.12493	37.5479	62.4521	1.10667	1.91455	13997.6	23.1104	11065.1	18.2688	4067.95	36.7638	1787.2	16.1517	4813.03
K06/5/A	K6	K6/5	A	river pocket water	river pocket water	river	2008	9	11	11.01. Hydraena palustris	sa	-	1	1	4	2.6	7.04	14.3	203	0.2	1.5	0.2	0.01	0	200	5.1	0.0027	100	0	4.29248	3.73002	59.6063	4.94375	21.9953	4.30728	1.12493	37.5479	62.4521	1.10667	1.91455	13997.6	23.1104	11065.1	18.2688	4067.95	36.7638	1787.2	16.1517	4813.03
K06/5/A	K6	K6/5	A	river pocket water	river pocket water	river	2008	10	14	05.01. Agabus bipustulatus	sb	-	1	1	4	3.9	7.23	11	273	0.5	3.9	0.4	0	9.5	231	7.3	0.0062	100	4.05721	2.86068	3.45207	55.1781	5.62509	20.5749	4.71737	3.53459	39.9547	60.0453	1.10667	2.09333	13997.6	23.1104	11065.1	18.2688	4067.95	36.7638	1787.2	16.1517	4813.03
K06/5/A	K6	K6/5	A	river pocket water	river pocket water	river	2008	10	14	05.16. Hydroporus erytrocephalus	sa	-	1	1	4	3.9	7.23	11	273	0.5	3.9	0.4	0	9.5	231	7.3	0.0062	100	4.05721	2.86068	3.45207	55.1781	5.62509	20.5749	4.71737	3.53459	39.9547	60.0453	1.10667	2.09333	13997.6	23.1104	11065.1	18.2688	4067.95	36.7638	1787.2	16.1517	4813.03
K06/5/A	K6	K6/5	A	river pocket water	river pocket water	river	2008	10	14	05.16. Hydroporus incognitus	sa	-	1	1	4	3.9	7.23	11	273	0.5	3.9	0.4	0	9.5	231	7.3	0.0062	100	4.05721	2.86068	3.45207	55.1781	5.62509	20.5749	4.71737	3.53459	39.9547	60.0453	1.10667	2.09333	13997.6	23.1104	11065.1	18.2688	4067.95	36.7638	1787.2	16.1517	4813.03
K06/5/A	K6	K6/5	A	river pocket water	river pocket water	river	2008	10	14	05.16. Hydroporus obscurus	sa	-	1	1	4	3.9	7.23	11	273	0.5	3.9	0.4	0	9.5	231	7.3	0.0062	100	4.05721	2.86068	3.45207	55.1781	5.62509	20.5749	4.71737	3.53459	39.9547	60.0453	1.10667	2.09333	13997.6	23.1104	11065.1	18.2688	4067.95	36.7638	1787.2	16.1517	4813.03
K06/5/A	K6	K6/5	A	river pocket water	river pocket water	river	2008	10	14	05.24. Hygrotus inaequalis	sb	-	3	3	4	3.9	7.23	11	273	0.5	3.9	0.4	0	9.5	231	7.3	0.0062	100	4.05721	2.86068	3.45207	55.1781	5.62509	20.5749	4.71737	3.53459	39.9547	60.0453	1.10667	2.09333	13997.6	23.1104	11065.1	18.2688	4067.95	36.7638	1787.2	16.1517	4813.03
K06/5/A	K6	K6/5	A	river pocket water	river pocket water	river	2008	10	14	05.25. Hyphydrus ovatus	sb	-	3	3	4	3.9	7.23	11	273	0.5	3.9	0.4	0	9.5	231	7.3	0.0062	100	4.05721	2.86068	3.45207	55.1781	5.62509	20.5749	4.71737	3.53459	39.9547	60.0453	1.10667	2.09333	13997.6	23.1104	11065.1	18.2688	4067.95	36.7638	1787.2	16.1517	4813.03
K06/5/A	K6	K6/5	A	river pocket water	river pocket water	river	2008	10	14	06.01. Helophorus granularis	sa	-	1	1	4	3.9	7.23	11	273	0.5	3.9	0.4	0	9.5	231	7.3	0.0062	100	4.05721	2.86068	3.45207	55.1781	5.62509	20.5749	4.71737	3.53459	39.9547	60.0453	1.10667	2.09333	13997.6	23.1104	11065.1	18.2688	4067.95	36.7638	1787.2	16.1517	4813.03
K06/5/A	K6	K6/5	A	river pocket water	river pocket water	river	2008	10	14	11.02. Limnebius parvulus	sb	-	2	2	4	3.9	7.23	11	273	0.5	3.9	0.4	0	9.5	231	7.3	0.0062	100	4.05721	2.86068	3.45207	55.1781	5.62509	20.5749	4.71737	3.53459	39.9547	60.0453	1.10667	2.09333	13997.6	23.1104	11065.1	18.2688	4067.95	36.7638	1787.2	16.1517	4813.03
K06/5/B	K6	K6/5	B	river pocket water	river pocket water	river	2008	5	5	01.02. Gyrinus substriatus	sb	-	1	1	2	5.4	6.77	13.7	243	0.5	0.5	0.5	0.07	4.8	223	4.3	0.0093	100	2.27701	1.68028	2.44975	42.7921	5.90452	28.1093	11.6677	5.11935	41.343	58.657	1.10667	2.04182	13997.6	23.1104	11065.1	18.2688	4067.95	36.7638	1787.2	16.1517	4813.03
K06/5/B	K6	K6/5	B	river pocket water	river pocket water	river	2008	6	3	02.02. Haliplus fluviatilis	re	-	1	1	4	7.5	7.3	18.4	248	0.3	4	0.2	0.05	43	196	3.9	0.0016	100	2.48812	1.46771	2.61392	41.1378	5.28376	31.4789	10.875	4.65474	41.1109	58.8891	1.10667	2.04182	13997.6	23.1104	11065.1	18.2688	4067.95	36.7638	1787.2	16.1517	4813.03
K06/5/B	K6	K6/5	B	river pocket water	river pocket water	river	2008	6	3	05.16. Hydroporus incognitus	sa	-	1	1	4	7.5	7.3	18.4	248	0.3	4	0.2	0.05	43	196	3.9	0.0016	100	2.48812	1.46771	2.61392	41.1378	5.28376	31.4789	10.875	4.65474	41.1109	58.8891	1.10667	2.04182	13997.6	23.1104	11065.1	18.2688	4067.95	36.7638	1787.2	16.1517	4813.03
K06/5/B	K6	K6/5	B	river pocket water	river pocket water	river	2008	6	3	05.24. Hygrotus decoratus	sa	-	1	1	4	7.5	7.3	18.4	248	0.3	4	0.2	0.05	43	196	3.9	0.0016	100	2.48812	1.46771	2.61392	41.1378	5.28376	31.4789	10.875	4.65474	41.1109	58.8891	1.10667	2.04182	13997.6	23.1104	11065.1	18.2688	4067.95	36.7638	1787.2	16.1517	4813.03
K06/5/B	K6	K6/5	B	river pocket water	river pocket water	river	2008	6	3	05.25. Hyphydrus ovatus	sb	-	1	1	4	7.5	7.3	18.4	248	0.3	4	0.2	0.05	43	196	3.9	0.0016	100	2.48812	1.46771	2.61392	41.1378	5.28376	31.4789	10.875	4.65474	41.1109	58.8891	1.10667	2.04182	13997.6	23.1104	11065.1	18.2688	4067.95	36.7638	1787.2	16.1517	4813.03
K06/5/B	K6	K6/5	B	river pocket water	river pocket water	river	2008	8	6	05.01. Agabus bipustulatus	sb	-	2	2	4	8.7	5.75	15.9	261	1.2	3.9	0.4	0.01	3.7	166	4.3	0.0035	100	21.4494	6.59981	7.79683	37.3989	2.4911	14.9143	8.63798	0.711744	49.0791	50.9209	1.54667	1.4603	13997.6	23.1104	11065.1	18.2688	4067.95	36.7638	1787.2	16.1517	4813.03
K06/5/B	K6	K6/5	B	river pocket water	river pocket water	river	2008	8	6	05.02. Ilybius fuliginosus	re	-	1	1	4	8.7	5.75	15.9	261	1.2	3.9	0.4	0.01	3.7	166	4.3	0.0035	100	21.4494	6.59981	7.79683	37.3989	2.4911	14.9143	8.63798	0.711744	49.0791	50.9209	1.54667	1.4603	13997.6	23.1104	11065.1	18.2688	4067.95	36.7638	1787.2	16.1517	4813.03
K06/5/B	K6	K6/5	B	river pocket water	river pocket water	river	2008	8	6	05.02. Ilybius quadriguttatus	sa	-	1	1	4	8.7	5.75	15.9	261	1.2	3.9	0.4	0.01	3.7	166	4.3	0.0035	100	21.4494	6.59981	7.79683	37.3989	2.4911	14.9143	8.63798	0.711744	49.0791	50.9209	1.54667	1.4603	13997.6	23.1104	11065.1	18.2688	4067.95	36.7638	1787.2	16.1517	4813.03
K06/5/B	K6	K6/5	B	river pocket water	river pocket water	river	2008	8	6	05.05. Rhantus sp.	sb	1	-	1	4	8.7	5.75	15.9	261	1.2	3.9	0.4	0.01	3.7	166	4.3	0.0035	100	21.4494	6.59981	7.79683	37.3989	2.4911	14.9143	8.63798	0.711744	49.0791	50.9209	1.54667	1.4603	13997.6	23.1104	11065.1	18.2688	4067.95	36.7638	1787.2	16.1517	4813.03
K06/5/B	K6	K6/5	B	river pocket water	river pocket water	river	2008	8	6	05.07. Acilius canaliculatus	sa	-	2	2	4	8.7	5.75	15.9	261	1.2	3.9	0.4	0.01	3.7	166	4.3	0.0035	100	21.4494	6.59981	7.79683	37.3989	2.4911	14.9143	8.63798	0.711744	49.0791	50.9209	1.54667	1.4603	13997.6	23.1104	11065.1	18.2688	4067.95	36.7638	1787.2	16.1517	4813.03
K06/5/B	K6	K6/5	B	river pocket water	river pocket water	river	2008	8	6	05.11. Hydaticus seminiger	sb	-	1	1	4	8.7	5.75	15.9	261	1.2	3.9	0.4	0.01	3.7	166	4.3	0.0035	100	21.4494	6.59981	7.79683	37.3989	2.4911	14.9143	8.63798	0.711744	49.0791	50.9209	1.54667	1.4603	13997.6	23.1104	11065.1	18.2688	4067.95	36.7638	1787.2	16.1517	4813.03
K06/5/B	K6	K6/5	B	river pocket water	river pocket water	river	2008	8	6	05.16. Hydroporus incognitus	sa	-	1	1	4	8.7	5.75	15.9	261	1.2	3.9	0.4	0.01	3.7	166	4.3	0.0035	100	21.4494	6.59981	7.79683	37.3989	2.4911	14.9143	8.63798	0.711744	49.0791	50.9209	1.54667	1.4603	13997.6	23.1104	11065.1	18.2688	4067.95	36.7638	1787.2	16.1517	4813.03
K06/5/B	K6	K6/5	B	river pocket water	river pocket water	river	2008	8	6	10.07. Enochrus quadripunctatus	sb	-	1	1	4	8.7	5.75	15.9	261	1.2	3.9	0.4	0.01	3.7	166	4.3	0.0035	100	21.4494	6.59981	7.79683	37.3989	2.4911	14.9143	8.63798	0.711744	49.0791	50.9209	1.54667	1.4603	13997.6	23.1104	11065.1	18.2688	4067.95	36.7638	1787.2	16.1517	4813.03
K06/5/B	K6	K6/5	B	river pocket water	river pocket water	river	2008	8	6	10.09. Hydrobius fuscipes	sb	-	1	1	4	8.7	5.75	15.9	261	1.2	3.9	0.4	0.01	3.7	166	4.3	0.0035	100	21.4494	6.59981	7.79683	37.3989	2.4911	14.9143	8.63798	0.711744	49.0791	50.9209	1.54667	1.4603	13997.6	23.1104	11065.1	18.2688	4067.95	36.7638	1787.2	16.1517	4813.03
K06/5/B	K6	K6/5	B	river pocket water	river pocket water	river	2008	8	6	10.11. Hydrochara caraboides	sb	-	1	1	4	8.7	5.75	15.9	261	1.2	3.9	0.4	0.01	3.7	166	4.3	0.0035	100	21.4494	6.59981	7.79683	37.3989	2.4911	14.9143	8.63798	0.711744	49.0791	50.9209	1.54667	1.4603	13997.6	23.1104	11065.1	18.2688	4067.95	36.7638	1787.2	16.1517	4813.03
K06/5/B	K6	K6/5	B	river pocket water	river pocket water	river	2008	8	6	11.01. Hydraena palustris	sa	-	1	1	4	8.7	5.75	15.9	261	1.2	3.9	0.4	0.01	3.7	166	4.3	0.0035	100	21.4494	6.59981	7.79683	37.3989	2.4911	14.9143	8.63798	0.711744	49.0791	50.9209	1.54667	1.4603	13997.6	23.1104	11065.1	18.2688	4067.95	36.7638	1787.2	16.1517	4813.03
K06/5/B	K6	K6/5	B	river pocket water	river pocket water	river	2008	9	11	05.02. Ilybius ater	sa	-	2	2	4	2.6	7.04	14.3	203	0.2	1.5	0.2	0.01	0	200	5.1	0.0027	100	0	4.29248	3.73002	59.6063	4.94375	21.9953	4.30728	1.12493	37.5479	62.4521	1.10667	1.91455	13997.6	23.1104	11065.1	18.2688	4067.95	36.7638	1787.2	16.1517	4813.03
K06/5/B	K6	K6/5	B	river pocket water	river pocket water	river	2008	9	11	05.02. Ilybius fuliginosus	re	-	3	3	4	2.6	7.04	14.3	203	0.2	1.5	0.2	0.01	0	200	5.1	0.0027	100	0	4.29248	3.73002	59.6063	4.94375	21.9953	4.30728	1.12493	37.5479	62.4521	1.10667	1.91455	13997.6	23.1104	11065.1	18.2688	4067.95	36.7638	1787.2	16.1517	4813.03
K06/5/B	K6	K6/5	B	river pocket water	river pocket water	river	2008	9	11	05.02. Ilybius fuliginosus	re	-	1	1	4	2.6	7.04	14.3	203	0.2	1.5	0.2	0.01	0	200	5.1	0.0027	100	0	4.29248	3.73002	59.6063	4.94375	21.9953	4.30728	1.12493	37.5479	62.4521	1.10667	1.91455	13997.6	23.1104	11065.1	18.2688	4067.95	36.7638	1787.2	16.1517	4813.03
K06/5/B	K6	K6/5	B	river pocket water	river pocket water	river	2008	9	11	05.07. Acilius canaliculatus	sa	-	1	1	4	2.6	7.04	14.3	203	0.2	1.5	0.2	0.01	0	200	5.1	0.0027	100	0	4.29248	3.73002	59.6063	4.94375	21.9953	4.30728	1.12493	37.5479	62.4521	1.10667	1.91455	13997.6	23.1104	11065.1	18.2688	4067.95	36.7638	1787.2	16.1517	4813.03
K06/5/B	K6	K6/5	B	river pocket water	river pocket water	river	2008	9	11	05.16. Hydroporus erytrocephalus	sa	-	1	1	4	2.6	7.04	14.3	203	0.2	1.5	0.2	0.01	0	200	5.1	0.0027	100	0	4.29248	3.73002	59.6063	4.94375	21.9953	4.30728	1.12493	37.5479	62.4521	1.10667	1.91455	13997.6	23.1104	11065.1	18.2688	4067.95	36.7638	1787.2	16.1517	4813.03
K06/5/B	K6	K6/5	B	river pocket water	river pocket water	river	2008	9	11	05.16. Hydroporus incognitus	sa	-	2	2	4	2.6	7.04	14.3	203	0.2	1.5	0.2	0.01	0	200	5.1	0.0027	100	0	4.29248	3.73002	59.6063	4.94375	21.9953	4.30728	1.12493	37.5479	62.4521	1.10667	1.91455	13997.6	23.1104	11065.1	18.2688	4067.95	36.7638	1787.2	16.1517	4813.03
K06/5/B	K6	K6/5	B	river pocket water	river pocket water	river	2008	9	11	05.27. Laccophilus hyalinus	re	-	2	2	4	2.6	7.04	14.3	203	0.2	1.5	0.2	0.01	0	200	5.1	0.0027	100	0	4.29248	3.73002	59.6063	4.94375	21.9953	4.30728	1.12493	37.5479	62.4521	1.10667	1.91455	13997.6	23.1104	11065.1	18.2688	4067.95	36.7638	1787.2	16.1517	4813.03
K06/5/B	K6	K6/5	B	river pocket water	river pocket water	river	2008	9	11	10.01. Anacaena limbata	sb	-	1	1	4	2.6	7.04	14.3	203	0.2	1.5	0.2	0.01	0	200	5.1	0.0027	100	0	4.29248	3.73002	59.6063	4.94375	21.9953	4.30728	1.12493	37.5479	62.4521	1.10667	1.91455	13997.6	23.1104	11065.1	18.2688	4067.95	36.7638	1787.2	16.1517	4813.03
K06/5/B	K6	K6/5	B	river pocket water	river pocket water	river	2008	9	11	11.01. Hydraena palustris	sa	-	11	11	4	2.6	7.04	14.3	203	0.2	1.5	0.2	0.01	0	200	5.1	0.0027	100	0	4.29248	3.73002	59.6063	4.94375	21.9953	4.30728	1.12493	37.5479	62.4521	1.10667	1.91455	13997.6	23.1104	11065.1	18.2688	4067.95	36.7638	1787.2	16.1517	4813.03
K06/5/B	K6	K6/5	B	river pocket water	river pocket water	river	2008	9	11	11.01. Hydraena palustris	sa	-	1	1	4	2.6	7.04	14.3	203	0.2	1.5	0.2	0.01	0	200	5.1	0.0027	100	0	4.29248	3.73002	59.6063	4.94375	21.9953	4.30728	1.12493	37.5479	62.4521	1.10667	1.91455	13997.6	23.1104	11065.1	18.2688	4067.95	36.7638	1787.2	16.1517	4813.03
K06/5/B	K6	K6/5	B	river pocket water	river pocket water	river	2008	9	11	11.02. Limnebius parvulus	sb	-	2	2	4	2.6	7.04	14.3	203	0.2	1.5	0.2	0.01	0	200	5.1	0.0027	100	0	4.29248	3.73002	59.6063	4.94375	21.9953	4.30728	1.12493	37.5479	62.4521	1.10667	1.91455	13997.6	23.1104	11065.1	18.2688	4067.95	36.7638	1787.2	16.1517	4813.03
K06/5/B	K6	K6/5	B	river pocket water	river pocket water	river	2008	10	14	05.05. Rhantus sp.	sb	1	-	1	4	3.9	7.23	11	273	0.5	3.9	0.4	0	9.5	231	7.3	0.0062	100	4.05721	2.86068	3.45207	55.1781	5.62509	20.5749	4.71737	3.53459	39.9547	60.0453	1.10667	2.09333	13997.6	23.1104	11065.1	18.2688	4067.95	36.7638	1787.2	16.1517	4813.03
K06/5/B	K6	K6/5	B	river pocket water	river pocket water	river	2008	10	14	05.25. Hyphydrus ovatus	sb	-	1	1	4	3.9	7.23	11	273	0.5	3.9	0.4	0	9.5	231	7.3	0.0062	100	4.05721	2.86068	3.45207	55.1781	5.62509	20.5749	4.71737	3.53459	39.9547	60.0453	1.10667	2.09333	13997.6	23.1104	11065.1	18.2688	4067.95	36.7638	1787.2	16.1517	4813.03
K06/5/B	K6	K6/5	B	river pocket water	river pocket water	river	2008	10	14	06.01. Helophorus granularis	sa	-	1	1	4	3.9	7.23	11	273	0.5	3.9	0.4	0	9.5	231	7.3	0.0062	100	4.05721	2.86068	3.45207	55.1781	5.62509	20.5749	4.71737	3.53459	39.9547	60.0453	1.10667	2.09333	13997.6	23.1104	11065.1	18.2688	4067.95	36.7638	1787.2	16.1517	4813.03
K06/5/B	K6	K6/5	B	river pocket water	river pocket water	river	2008	10	14	11.01. Hydraena palustris	sa	-	5	5	4	3.9	7.23	11	273	0.5	3.9	0.4	0	9.5	231	7.3	0.0062	100	4.05721	2.86068	3.45207	55.1781	5.62509	20.5749	4.71737	3.53459	39.9547	60.0453	1.10667	2.09333	13997.6	23.1104	11065.1	18.2688	4067.95	36.7638	1787.2	16.1517	4813.03
K06/5/B	K6	K6/5	B	river pocket water	river pocket water	river	2008	10	14	11.02. Limnebius parvulus	sb	-	1	1	4	3.9	7.23	11	273	0.5	3.9	0.4	0	9.5	231	7.3	0.0062	100	4.05721	2.86068	3.45207	55.1781	5.62509	20.5749	4.71737	3.53459	39.9547	60.0453	1.10667	2.09333	13997.6	23.1104	11065.1	18.2688	4067.95	36.7638	1787.2	16.1517	4813.03
K06/6/B	K6	K6/6	B	river current	river current, peat	river	2008	6	12	05.01. Agabus bipustulatus	sb	-	1	1	0	7.5	7.3	18.4	248	0.3	4	0.2	0.05	43	196	3.9	0.0987	100	3.46657	5.44747	7.81747	56.5971	5.44747	14.9275	3.53732	2.75911	55.395	44.605	0.58	1.57106	13997.6	23.1104	11065.1	18.2688	4067.95	36.7638	1787.2	16.1517	4813.03
K06/6/B	K6	K6/6	B	river current	river current, peat	river	2008	6	12	05.04. Colymbetes fuscus	sb	-	1	1	0	7.5	7.3	18.4	248	0.3	4	0.2	0.05	43	196	3.9	0.0987	100	3.46657	5.44747	7.81747	56.5971	5.44747	14.9275	3.53732	2.75911	55.395	44.605	0.58	1.57106	13997.6	23.1104	11065.1	18.2688	4067.95	36.7638	1787.2	16.1517	4813.03
K06/6/B	K6	K6/6	B	river current	river current, peat	river	2008	6	12	05.05. Rhantus suturalis	sb	-	1	1	0	7.5	7.3	18.4	248	0.3	4	0.2	0.05	43	196	3.9	0.0987	100	3.46657	5.44747	7.81747	56.5971	5.44747	14.9275	3.53732	2.75911	55.395	44.605	0.58	1.57106	13997.6	23.1104	11065.1	18.2688	4067.95	36.7638	1787.2	16.1517	4813.03
K06/6/B	K6	K6/6	B	river current	river current, peat	river	2008	6	12	05.24. Hygrotus decoratus	sa	-	1	1	0	7.5	7.3	18.4	248	0.3	4	0.2	0.05	43	196	3.9	0.0987	100	3.46657	5.44747	7.81747	56.5971	5.44747	14.9275	3.53732	2.75911	55.395	44.605	0.58	1.57106	13997.6	23.1104	11065.1	18.2688	4067.95	36.7638	1787.2	16.1517	4813.03
K06/6/B	K6	K6/6	B	river current	river current, peat	river	2008	6	12	11.01. Hydraena palustris	sa	-	1	1	0	7.5	7.3	18.4	248	0.3	4	0.2	0.05	43	196	3.9	0.0987	100	3.46657	5.44747	7.81747	56.5971	5.44747	14.9275	3.53732	2.75911	55.395	44.605	0.58	1.57106	13997.6	23.1104	11065.1	18.2688	4067.95	36.7638	1787.2	16.1517	4813.03
K06/5/C	K6	K6/5	C	river pocket water	river pocket water	river	2008	5	5	05.10. Dytiscus dimidiatus	sb	-	1	1	2	5.4	6.77	13.7	243	0.5	0.5	0.5	0.07	4.8	223	4.3	0.0093	100	2.27701	1.68028	2.44975	42.7921	5.90452	28.1093	11.6677	5.11935	41.343	58.657	1.10667	2.04182	13997.6	23.1104	11065.1	18.2688	4067.95	36.7638	1787.2	16.1517	4813.03
K06/5/C	K6	K6/5	C	river pocket water	river pocket water	river	2008	7	8	05.02. Ilybius quadriguttatus	sa	-	1	1	4	8.5	7.63	17.4	302	0.4	4.2	0.2	0.04	48	176	3.7	0.0018	100	21.4494	6.59981	7.79683	37.3989	2.4911	14.9143	8.63798	0.711744	49.0791	50.9209	0.666667	1.4603	13997.6	23.1104	11065.1	18.2688	4067.95	36.7638	1787.2	16.1517	4813.03
K06/5/C	K6	K6/5	C	river pocket water	river pocket water	river	2008	7	8	05.07. Acilius sulcatus	sb	-	1	1	4	8.5	7.63	17.4	302	0.4	4.2	0.2	0.04	48	176	3.7	0.0018	100	21.4494	6.59981	7.79683	37.3989	2.4911	14.9143	8.63798	0.711744	49.0791	50.9209	0.666667	1.4603	13997.6	23.1104	11065.1	18.2688	4067.95	36.7638	1787.2	16.1517	4813.03
K06/5/C	K6	K6/5	C	river pocket water	river pocket water	river	2008	7	8	11.01. Hydraena palustris	sa	-	3	3	4	8.5	7.63	17.4	302	0.4	4.2	0.2	0.04	48	176	3.7	0.0018	100	21.4494	6.59981	7.79683	37.3989	2.4911	14.9143	8.63798	0.711744	49.0791	50.9209	0.666667	1.4603	13997.6	23.1104	11065.1	18.2688	4067.95	36.7638	1787.2	16.1517	4813.03
K06/5/C	K6	K6/5	C	river pocket water	river pocket water	river	2008	8	6	05.02. Ilybius fenestratus	re	-	2	2	4	8.7	5.75	15.9	261	1.2	3.9	0.4	0.01	3.7	166	4.3	0.0035	100	21.4494	6.59981	7.79683	37.3989	2.4911	14.9143	8.63798	0.711744	49.0791	50.9209	1.54667	1.4603	13997.6	23.1104	11065.1	18.2688	4067.95	36.7638	1787.2	16.1517	4813.03
K06/5/C	K6	K6/5	C	river pocket water	river pocket water	river	2008	8	6	05.02. Ilybius fuliginosus	re	-	5	5	4	8.7	5.75	15.9	261	1.2	3.9	0.4	0.01	3.7	166	4.3	0.0035	100	21.4494	6.59981	7.79683	37.3989	2.4911	14.9143	8.63798	0.711744	49.0791	50.9209	1.54667	1.4603	13997.6	23.1104	11065.1	18.2688	4067.95	36.7638	1787.2	16.1517	4813.03
K06/5/C	K6	K6/5	C	river pocket water	river pocket water	river	2008	8	6	05.16. Hydroporus angustatus	sa	-	1	1	4	8.7	5.75	15.9	261	1.2	3.9	0.4	0.01	3.7	166	4.3	0.0035	100	21.4494	6.59981	7.79683	37.3989	2.4911	14.9143	8.63798	0.711744	49.0791	50.9209	1.54667	1.4603	13997.6	23.1104	11065.1	18.2688	4067.95	36.7638	1787.2	16.1517	4813.03
K06/5/C	K6	K6/5	C	river pocket water	river pocket water	river	2008	8	6	10.08. Helochares obscurus	sb	-	1	1	4	8.7	5.75	15.9	261	1.2	3.9	0.4	0.01	3.7	166	4.3	0.0035	100	21.4494	6.59981	7.79683	37.3989	2.4911	14.9143	8.63798	0.711744	49.0791	50.9209	1.54667	1.4603	13997.6	23.1104	11065.1	18.2688	4067.95	36.7638	1787.2	16.1517	4813.03
K06/5/C	K6	K6/5	C	river pocket water	river pocket water	river	2008	8	6	11.01. Hydraena palustris	sa	-	5	5	4	8.7	5.75	15.9	261	1.2	3.9	0.4	0.01	3.7	166	4.3	0.0035	100	21.4494	6.59981	7.79683	37.3989	2.4911	14.9143	8.63798	0.711744	49.0791	50.9209	1.54667	1.4603	13997.6	23.1104	11065.1	18.2688	4067.95	36.7638	1787.2	16.1517	4813.03
K06/5/C	K6	K6/5	C	river pocket water	river pocket water	river	2008	9	11	05.02. Ilybius fuliginosus	re	-	1	1	4	2.6	7.04	14.3	203	0.2	1.5	0.2	0.01	0	200	5.1	0.0027	100	0	4.29248	3.73002	59.6063	4.94375	21.9953	4.30728	1.12493	37.5479	62.4521	1.10667	1.91455	13997.6	23.1104	11065.1	18.2688	4067.95	36.7638	1787.2	16.1517	4813.03
K06/5/C	K6	K6/5	C	river pocket water	river pocket water	river	2008	9	11	05.02. Ilybius quadriguttatus	sa	-	5	5	4	2.6	7.04	14.3	203	0.2	1.5	0.2	0.01	0	200	5.1	0.0027	100	0	4.29248	3.73002	59.6063	4.94375	21.9953	4.30728	1.12493	37.5479	62.4521	1.10667	1.91455	13997.6	23.1104	11065.1	18.2688	4067.95	36.7638	1787.2	16.1517	4813.03
K06/5/C	K6	K6/5	C	river pocket water	river pocket water	river	2008	9	11	05.04. Colymbetes paykulli	sa	-	2	2	4	2.6	7.04	14.3	203	0.2	1.5	0.2	0.01	0	200	5.1	0.0027	100	0	4.29248	3.73002	59.6063	4.94375	21.9953	4.30728	1.12493	37.5479	62.4521	1.10667	1.91455	13997.6	23.1104	11065.1	18.2688	4067.95	36.7638	1787.2	16.1517	4813.03
K06/5/C	K6	K6/5	C	river pocket water	river pocket water	river	2008	9	11	05.16. Hydroporus incognitus	sa	-	3	3	4	2.6	7.04	14.3	203	0.2	1.5	0.2	0.01	0	200	5.1	0.0027	100	0	4.29248	3.73002	59.6063	4.94375	21.9953	4.30728	1.12493	37.5479	62.4521	1.10667	1.91455	13997.6	23.1104	11065.1	18.2688	4067.95	36.7638	1787.2	16.1517	4813.03
K06/5/C	K6	K6/5	C	river pocket water	river pocket water	river	2008	9	11	05.24. Hygrotus decoratus	sa	-	2	2	4	2.6	7.04	14.3	203	0.2	1.5	0.2	0.01	0	200	5.1	0.0027	100	0	4.29248	3.73002	59.6063	4.94375	21.9953	4.30728	1.12493	37.5479	62.4521	1.10667	1.91455	13997.6	23.1104	11065.1	18.2688	4067.95	36.7638	1787.2	16.1517	4813.03
K06/5/C	K6	K6/5	C	river pocket water	river pocket water	river	2008	9	11	05.25. Hyphydrus ovatus	sb	-	2	2	4	2.6	7.04	14.3	203	0.2	1.5	0.2	0.01	0	200	5.1	0.0027	100	0	4.29248	3.73002	59.6063	4.94375	21.9953	4.30728	1.12493	37.5479	62.4521	1.10667	1.91455	13997.6	23.1104	11065.1	18.2688	4067.95	36.7638	1787.2	16.1517	4813.03
K06/5/C	K6	K6/5	C	river pocket water	river pocket water	river	2008	9	11	11.01. Hydraena palustris	sa	-	2	2	4	2.6	7.04	14.3	203	0.2	1.5	0.2	0.01	0	200	5.1	0.0027	100	0	4.29248	3.73002	59.6063	4.94375	21.9953	4.30728	1.12493	37.5479	62.4521	1.10667	1.91455	13997.6	23.1104	11065.1	18.2688	4067.95	36.7638	1787.2	16.1517	4813.03
K06/5/C	K6	K6/5	C	river pocket water	river pocket water	river	2008	9	11	11.02. Limnebius parvulus	sb	-	2	2	4	2.6	7.04	14.3	203	0.2	1.5	0.2	0.01	0	200	5.1	0.0027	100	0	4.29248	3.73002	59.6063	4.94375	21.9953	4.30728	1.12493	37.5479	62.4521	1.10667	1.91455	13997.6	23.1104	11065.1	18.2688	4067.95	36.7638	1787.2	16.1517	4813.03
K06/5/C	K6	K6/5	C	river pocket water	river pocket water	river	2008	10	14	05.16. Hydroporus angustatus	sa	-	2	2	4	3.9	7.23	11	273	0.5	3.9	0.4	0	9.5	231	7.3	0.0062	100	4.05721	2.86068	3.45207	55.1781	5.62509	20.5749	4.71737	3.53459	39.9547	60.0453	1.10667	2.09333	13997.6	23.1104	11065.1	18.2688	4067.95	36.7638	1787.2	16.1517	4813.03
K06/5/C	K6	K6/5	C	river pocket water	river pocket water	river	2008	10	14	05.25. Hyphydrus ovatus	sb	-	1	1	4	3.9	7.23	11	273	0.5	3.9	0.4	0	9.5	231	7.3	0.0062	100	4.05721	2.86068	3.45207	55.1781	5.62509	20.5749	4.71737	3.53459	39.9547	60.0453	1.10667	2.09333	13997.6	23.1104	11065.1	18.2688	4067.95	36.7638	1787.2	16.1517	4813.03
K06/5/C	K6	K6/5	C	river pocket water	river pocket water	river	2008	10	14	06.01. Helophorus granularis	sa	-	1	1	4	3.9	7.23	11	273	0.5	3.9	0.4	0	9.5	231	7.3	0.0062	100	4.05721	2.86068	3.45207	55.1781	5.62509	20.5749	4.71737	3.53459	39.9547	60.0453	1.10667	2.09333	13997.6	23.1104	11065.1	18.2688	4067.95	36.7638	1787.2	16.1517	4813.03
K06/5/C	K6	K6/5	C	river pocket water	river pocket water	river	2008	10	14	11.02. Limnebius atomus	sb	-	1	1	4	3.9	7.23	11	273	0.5	3.9	0.4	0	9.5	231	7.3	0.0062	100	4.05721	2.86068	3.45207	55.1781	5.62509	20.5749	4.71737	3.53459	39.9547	60.0453	1.10667	2.09333	13997.6	23.1104	11065.1	18.2688	4067.95	36.7638	1787.2	16.1517	4813.03
K06/6/A	K6	K6/6	A	river current	river current, peat	river	2008	8	6	01.02. Gyrinus substriatus	sb	-	1	1	0	8.7	5.75	15.9	261	1.2	3.9	0.4	0.01	3.7	166	4.3	0.1194	100	12.6588	4.389	5.15131	48.1173	4.8972	17.6715	4.4583	2.6565	40.4002	59.5998	0.88	1.9603	13997.6	23.1104	11065.1	18.2688	4067.95	36.7638	1787.2	16.1517	4813.03
K06/6/A	K6	K6/6	A	river current	river current, peat	river	2008	8	6	02.02. Haliplus heydeni	sb	-	4	4	0	8.7	5.75	15.9	261	1.2	3.9	0.4	0.01	3.7	166	4.3	0.1194	100	12.6588	4.389	5.15131	48.1173	4.8972	17.6715	4.4583	2.6565	40.4002	59.5998	0.88	1.9603	13997.6	23.1104	11065.1	18.2688	4067.95	36.7638	1787.2	16.1517	4813.03
K06/6/A	K6	K6/6	A	river current	river current, peat	river	2008	8	6	05.16. Hydroporus incognitus	sa	-	2	2	0	8.7	5.75	15.9	261	1.2	3.9	0.4	0.01	3.7	166	4.3	0.1194	100	12.6588	4.389	5.15131	48.1173	4.8972	17.6715	4.4583	2.6565	40.4002	59.5998	0.88	1.9603	13997.6	23.1104	11065.1	18.2688	4067.95	36.7638	1787.2	16.1517	4813.03
K06/6/A	K6	K6/6	A	river current	river current, peat	river	2008	8	6	05.24. Hygrotus inaequalis	sb	-	1	1	0	8.7	5.75	15.9	261	1.2	3.9	0.4	0.01	3.7	166	4.3	0.1194	100	12.6588	4.389	5.15131	48.1173	4.8972	17.6715	4.4583	2.6565	40.4002	59.5998	0.88	1.9603	13997.6	23.1104	11065.1	18.2688	4067.95	36.7638	1787.2	16.1517	4813.03
K06/6/A	K6	K6/6	A	river current	river current, peat	river	2008	8	6	08.01. Hydrochus brevis	sb	-	1	1	0	8.7	5.75	15.9	261	1.2	3.9	0.4	0.01	3.7	166	4.3	0.1194	100	12.6588	4.389	5.15131	48.1173	4.8972	17.6715	4.4583	2.6565	40.4002	59.5998	0.88	1.9603	13997.6	23.1104	11065.1	18.2688	4067.95	36.7638	1787.2	16.1517	4813.03
K06/6/A	K6	K6/6	A	river current	river current, peat	river	2008	8	6	11.01. Hydraena palustris	sa	-	2	2	0	8.7	5.75	15.9	261	1.2	3.9	0.4	0.01	3.7	166	4.3	0.1194	100	12.6588	4.389	5.15131	48.1173	4.8972	17.6715	4.4583	2.6565	40.4002	59.5998	0.88	1.9603	13997.6	23.1104	11065.1	18.2688	4067.95	36.7638	1787.2	16.1517	4813.03
K06/6/A	K6	K6/6	A	river current	river current, peat	river	2008	9	11	01.02. Gyrinus substriatus	sb	-	1	1	0	2.6	7.04	14.3	203	0.2	1.5	0.2	0.01	0	200	5.1	0.1118	100	3.25114	4.29224	3.25114	52.9315	8.73059	23.3059	2.52055	1.71689	37.0827	62.9173	1.10667	1.96606	13997.6	23.1104	11065.1	18.2688	4067.95	36.7638	1787.2	16.1517	4813.03
K06/6/A	K6	K6/6	A	river current	river current, peat	river	2008	9	11	02.02. Haliplus fluviatilis	re	-	1	1	0	2.6	7.04	14.3	203	0.2	1.5	0.2	0.01	0	200	5.1	0.1118	100	3.25114	4.29224	3.25114	52.9315	8.73059	23.3059	2.52055	1.71689	37.0827	62.9173	1.10667	1.96606	13997.6	23.1104	11065.1	18.2688	4067.95	36.7638	1787.2	16.1517	4813.03
K06/6/A	K6	K6/6	A	river current	river current, peat	river	2008	9	11	02.02. Haliplus fulvus	sb	-	3	3	0	2.6	7.04	14.3	203	0.2	1.5	0.2	0.01	0	200	5.1	0.1118	100	3.25114	4.29224	3.25114	52.9315	8.73059	23.3059	2.52055	1.71689	37.0827	62.9173	1.10667	1.96606	13997.6	23.1104	11065.1	18.2688	4067.95	36.7638	1787.2	16.1517	4813.03
K06/6/A	K6	K6/6	A	river current	river current, peat	river	2008	9	11	02.02. Haliplus lineatocollis	re	-	1	1	0	2.6	7.04	14.3	203	0.2	1.5	0.2	0.01	0	200	5.1	0.1118	100	3.25114	4.29224	3.25114	52.9315	8.73059	23.3059	2.52055	1.71689	37.0827	62.9173	1.10667	1.96606	13997.6	23.1104	11065.1	18.2688	4067.95	36.7638	1787.2	16.1517	4813.03
K06/6/A	K6	K6/6	A	river current	river current, peat	river	2008	9	11	05.01. Agabus bipustulatus	sb	-	2	2	0	2.6	7.04	14.3	203	0.2	1.5	0.2	0.01	0	200	5.1	0.1118	100	3.25114	4.29224	3.25114	52.9315	8.73059	23.3059	2.52055	1.71689	37.0827	62.9173	1.10667	1.96606	13997.6	23.1104	11065.1	18.2688	4067.95	36.7638	1787.2	16.1517	4813.03
K06/6/A	K6	K6/6	A	river current	river current, peat	river	2008	9	11	10.11. Hydrochara caraboides	sb	-	1	1	0	2.6	7.04	14.3	203	0.2	1.5	0.2	0.01	0	200	5.1	0.1118	100	3.25114	4.29224	3.25114	52.9315	8.73059	23.3059	2.52055	1.71689	37.0827	62.9173	1.10667	1.96606	13997.6	23.1104	11065.1	18.2688	4067.95	36.7638	1787.2	16.1517	4813.03
K06/6/A	K6	K6/6	A	river current	river current, peat	river	2008	10	14	01.02. Gyrinus substriatus	sb	-	1	1	0	3.9	7.23	11	273	0.5	3.9	0.4	0	9.5	231	7.3	0.0847	100	2.19591	2.45425	3.25081	57.5457	5.94187	22.7557	3.83208	2.02368	37.0827	62.9173	1.10667	1.91455	13997.6	23.1104	11065.1	18.2688	4067.95	36.7638	1787.2	16.1517	4813.03
K06/6/A	K6	K6/6	A	river current	river current, peat	river	2008	10	14	02.02. Haliplus fluviatilis	re	-	1	1	0	3.9	7.23	11	273	0.5	3.9	0.4	0	9.5	231	7.3	0.0847	100	2.19591	2.45425	3.25081	57.5457	5.94187	22.7557	3.83208	2.02368	37.0827	62.9173	1.10667	1.91455	13997.6	23.1104	11065.1	18.2688	4067.95	36.7638	1787.2	16.1517	4813.03
K06/6/A	K6	K6/6	A	river current	river current, peat	river	2008	10	14	05.01. Agabus bipustulatus	sb	-	1	1	0	3.9	7.23	11	273	0.5	3.9	0.4	0	9.5	231	7.3	0.0847	100	2.19591	2.45425	3.25081	57.5457	5.94187	22.7557	3.83208	2.02368	37.0827	62.9173	1.10667	1.91455	13997.6	23.1104	11065.1	18.2688	4067.95	36.7638	1787.2	16.1517	4813.03
K06/6/B	K6	K6/6	B	river current	river current, peat	river	2008	7	8	05.02. Ilybius fuliginosus	re	-	1	1	0	8.5	7.63	17.4	302	0.4	4.2	0.2	0.04	48	176	3.7	0.0019	100	7.72822	4.97925	4.04564	54.9274	3.99378	19.3983	4.40871	0.518672	55.395	44.605	0.993333	1.74803	13997.6	23.1104	11065.1	18.2688	4067.95	36.7638	1787.2	16.1517	4813.03
K06/6/B	K6	K6/6	B	river current	river current, peat	river	2008	8	6	01.02. Gyrinus substriatus	sb	-	5	5	0	8.7	5.75	15.9	261	1.2	3.9	0.4	0.01	3.7	166	4.3	0.1194	100	12.6588	4.389	5.15131	48.1173	4.8972	17.6715	4.4583	2.6565	40.4002	59.5998	0.88	1.9603	13997.6	23.1104	11065.1	18.2688	4067.95	36.7638	1787.2	16.1517	4813.03
K06/6/B	K6	K6/6	B	river current	river current, peat	river	2008	8	6	02.02. Haliplus fluviatilis	re	-	1	1	0	8.7	5.75	15.9	261	1.2	3.9	0.4	0.01	3.7	166	4.3	0.1194	100	12.6588	4.389	5.15131	48.1173	4.8972	17.6715	4.4583	2.6565	40.4002	59.5998	0.88	1.9603	13997.6	23.1104	11065.1	18.2688	4067.95	36.7638	1787.2	16.1517	4813.03
K06/6/B	K6	K6/6	B	river current	river current, peat	river	2008	8	6	02.02. Haliplus heydeni	sb	-	2	2	0	8.7	5.75	15.9	261	1.2	3.9	0.4	0.01	3.7	166	4.3	0.1194	100	12.6588	4.389	5.15131	48.1173	4.8972	17.6715	4.4583	2.6565	40.4002	59.5998	0.88	1.9603	13997.6	23.1104	11065.1	18.2688	4067.95	36.7638	1787.2	16.1517	4813.03
K06/6/B	K6	K6/6	B	river current	river current, peat	river	2008	8	6	05.02. Ilybius fuliginosus	re	-	1	1	0	8.7	5.75	15.9	261	1.2	3.9	0.4	0.01	3.7	166	4.3	0.1194	100	12.6588	4.389	5.15131	48.1173	4.8972	17.6715	4.4583	2.6565	40.4002	59.5998	0.88	1.9603	13997.6	23.1104	11065.1	18.2688	4067.95	36.7638	1787.2	16.1517	4813.03
K06/6/B	K6	K6/6	B	river current	river current, peat	river	2008	8	6	05.16. Hydroporus obscurus	sa	-	1	1	0	8.7	5.75	15.9	261	1.2	3.9	0.4	0.01	3.7	166	4.3	0.1194	100	12.6588	4.389	5.15131	48.1173	4.8972	17.6715	4.4583	2.6565	40.4002	59.5998	0.88	1.9603	13997.6	23.1104	11065.1	18.2688	4067.95	36.7638	1787.2	16.1517	4813.03
K06/6/B	K6	K6/6	B	river current	river current, peat	river	2008	8	6	05.16. Hydroporus scalesianus	sa	-	1	1	0	8.7	5.75	15.9	261	1.2	3.9	0.4	0.01	3.7	166	4.3	0.1194	100	12.6588	4.389	5.15131	48.1173	4.8972	17.6715	4.4583	2.6565	40.4002	59.5998	0.88	1.9603	13997.6	23.1104	11065.1	18.2688	4067.95	36.7638	1787.2	16.1517	4813.03
K06/6/B	K6	K6/6	B	river current	river current, peat	river	2008	8	6	10.01. Anacaena limbata	sb	-	3	3	0	8.7	5.75	15.9	261	1.2	3.9	0.4	0.01	3.7	166	4.3	0.1194	100	12.6588	4.389	5.15131	48.1173	4.8972	17.6715	4.4583	2.6565	40.4002	59.5998	0.88	1.9603	13997.6	23.1104	11065.1	18.2688	4067.95	36.7638	1787.2	16.1517	4813.03
K06/6/B	K6	K6/6	B	river current	river current, peat	river	2008	8	6	11.01. Hydraena palustris	sa	-	3	3	0	8.7	5.75	15.9	261	1.2	3.9	0.4	0.01	3.7	166	4.3	0.1194	100	12.6588	4.389	5.15131	48.1173	4.8972	17.6715	4.4583	2.6565	40.4002	59.5998	0.88	1.9603	13997.6	23.1104	11065.1	18.2688	4067.95	36.7638	1787.2	16.1517	4813.03
K06/6/B	K6	K6/6	B	river current	river current, peat	river	2008	8	6	11.02. Limnebius parvulus	sb	-	1	1	0	8.7	5.75	15.9	261	1.2	3.9	0.4	0.01	3.7	166	4.3	0.1194	100	12.6588	4.389	5.15131	48.1173	4.8972	17.6715	4.4583	2.6565	40.4002	59.5998	0.88	1.9603	13997.6	23.1104	11065.1	18.2688	4067.95	36.7638	1787.2	16.1517	4813.03
K06/6/B	K6	K6/6	B	river current	river current, peat	river	2008	8	6	11.02. Limnebius truncatellus	rb	-	1	1	0	8.7	5.75	15.9	261	1.2	3.9	0.4	0.01	3.7	166	4.3	0.1194	100	12.6588	4.389	5.15131	48.1173	4.8972	17.6715	4.4583	2.6565	40.4002	59.5998	0.88	1.9603	13997.6	23.1104	11065.1	18.2688	4067.95	36.7638	1787.2	16.1517	4813.03
K06/6/B	K6	K6/6	B	river current	river current, peat	river	2008	10	14	01.02. Gyrinus substriatus	sb	-	2	2	0	3.9	7.23	11	273	0.5	3.9	0.4	0	9.5	231	7.3	0.0847	100	2.19591	2.45425	3.25081	57.5457	5.94187	22.7557	3.83208	2.02368	37.0827	62.9173	1.10667	1.91455	13997.6	23.1104	11065.1	18.2688	4067.95	36.7638	1787.2	16.1517	4813.03
K06/6/C	K6	K6/6	C	river current	river current, peat	river	2008	7	8	02.02. Haliplus fluviatilis	re	-	1	1	0	8.5	7.63	17.4	302	0.4	4.2	0.2	0.04	48	176	3.7	0.0019	100	7.72822	4.97925	4.04564	54.9274	3.99378	19.3983	4.40871	0.518672	55.395	44.605	0.993333	1.74803	13997.6	23.1104	11065.1	18.2688	4067.95	36.7638	1787.2	16.1517	4813.03
K06/6/C	K6	K6/6	C	river current	river current, peat	river	2008	7	8	05.25. Hyphydrus ovatus	sb	1	-	1	0	8.5	7.63	17.4	302	0.4	4.2	0.2	0.04	48	176	3.7	0.0019	100	7.72822	4.97925	4.04564	54.9274	3.99378	19.3983	4.40871	0.518672	55.395	44.605	0.993333	1.74803	13997.6	23.1104	11065.1	18.2688	4067.95	36.7638	1787.2	16.1517	4813.03
K06/6/C	K6	K6/6	C	river current	river current, peat	river	2008	7	8	11.01. Hydraena palustris	sa	-	1	1	0	8.5	7.63	17.4	302	0.4	4.2	0.2	0.04	48	176	3.7	0.0019	100	7.72822	4.97925	4.04564	54.9274	3.99378	19.3983	4.40871	0.518672	55.395	44.605	0.993333	1.74803	13997.6	23.1104	11065.1	18.2688	4067.95	36.7638	1787.2	16.1517	4813.03
K06/6/C	K6	K6/6	C	river current	river current, peat	river	2008	8	6	01.02. Gyrinus substriatus	sb	-	1	1	0	8.7	5.75	15.9	261	1.2	3.9	0.4	0.01	3.7	166	4.3	0.1194	100	12.6588	4.389	5.15131	48.1173	4.8972	17.6715	4.4583	2.6565	40.4002	59.5998	0.88	1.9603	13997.6	23.1104	11065.1	18.2688	4067.95	36.7638	1787.2	16.1517	4813.03
K06/6/C	K6	K6/6	C	river current	river current, peat	river	2008	8	6	02.02. Haliplus fluviatilis	re	-	4	4	0	8.7	5.75	15.9	261	1.2	3.9	0.4	0.01	3.7	166	4.3	0.1194	100	12.6588	4.389	5.15131	48.1173	4.8972	17.6715	4.4583	2.6565	40.4002	59.5998	0.88	1.9603	13997.6	23.1104	11065.1	18.2688	4067.95	36.7638	1787.2	16.1517	4813.03
K06/6/C	K6	K6/6	C	river current	river current, peat	river	2008	8	6	05.16. Hydroporus palustris	sb	-	2	2	0	8.7	5.75	15.9	261	1.2	3.9	0.4	0.01	3.7	166	4.3	0.1194	100	12.6588	4.389	5.15131	48.1173	4.8972	17.6715	4.4583	2.6565	40.4002	59.5998	0.88	1.9603	13997.6	23.1104	11065.1	18.2688	4067.95	36.7638	1787.2	16.1517	4813.03
K06/6/C	K6	K6/6	C	river current	river current, peat	river	2008	8	6	05.24. Hygrotus inaequalis	sb	-	1	1	0	8.7	5.75	15.9	261	1.2	3.9	0.4	0.01	3.7	166	4.3	0.1194	100	12.6588	4.389	5.15131	48.1173	4.8972	17.6715	4.4583	2.6565	40.4002	59.5998	0.88	1.9603	13997.6	23.1104	11065.1	18.2688	4067.95	36.7638	1787.2	16.1517	4813.03
K06/6/C	K6	K6/6	C	river current	river current, peat	river	2008	8	6	11.01. Hydraena palustris	sa	-	1	1	0	8.7	5.75	15.9	261	1.2	3.9	0.4	0.01	3.7	166	4.3	0.1194	100	12.6588	4.389	5.15131	48.1173	4.8972	17.6715	4.4583	2.6565	40.4002	59.5998	0.88	1.9603	13997.6	23.1104	11065.1	18.2688	4067.95	36.7638	1787.2	16.1517	4813.03
K06/6/C	K6	K6/6	C	river current	river current, peat	river	2008	9	11	05.01. Agabus bipustulatus	sb	-	1	1	0	2.6	7.04	14.3	203	0.2	1.5	0.2	0.01	0	200	5.1	0.1118	100	3.25114	4.29224	3.25114	52.9315	8.73059	23.3059	2.52055	1.71689	37.0827	62.9173	1.10667	1.96606	13997.6	23.1104	11065.1	18.2688	4067.95	36.7638	1787.2	16.1517	4813.03
K06/6/C	K6	K6/6	C	river current	river current, peat	river	2008	9	11	05.04. Colymbetes paykulli	sa	-	1	1	0	2.6	7.04	14.3	203	0.2	1.5	0.2	0.01	0	200	5.1	0.1118	100	3.25114	4.29224	3.25114	52.9315	8.73059	23.3059	2.52055	1.71689	37.0827	62.9173	1.10667	1.96606	13997.6	23.1104	11065.1	18.2688	4067.95	36.7638	1787.2	16.1517	4813.03
K06/8/A	K6	K6/8	A	river current	river current Berula, Callitriche	river	2008	5	5	05.02. Ilybius similis	sa	-	1	1	5	5.4	6.77	13.7	243	0.5	0.5	0.5	0.07	4.8	223	4.3	0.002	100	2.60989	4.9794	6.79945	58.9286	5.3228	14.1484	5.66621	1.54533	54.3969	45.6031	0.58	1.57106	13997.6	23.1104	11065.1	18.2688	4067.95	36.7638	1787.2	16.1517	4813.03
K06/8/A	K6	K6/8	A	river current	river current Berula, Callitriche	river	2008	5	5	05.25. Hyphydrus ovatus	sb	-	2	2	5	5.4	6.77	13.7	243	0.5	0.5	0.5	0.07	4.8	223	4.3	0.002	100	2.60989	4.9794	6.79945	58.9286	5.3228	14.1484	5.66621	1.54533	54.3969	45.6031	0.58	1.57106	13997.6	23.1104	11065.1	18.2688	4067.95	36.7638	1787.2	16.1517	4813.03
K06/8/A	K6	K6/8	A	river current	river current Berula, Callitriche	river	2008	7	8	02.02. Haliplus fluviatilis	re	-	1	1	5	7.3	8.22	17.2	203	0.3	2.1	0.1	0.02	0.7	174	3.6	0.0018	100	7.72822	4.97925	4.04564	54.9274	3.99378	19.3983	4.40871	0.518672	55.395	44.605	1.10667	1.66303	13997.6	23.1104	11065.1	18.2688	4067.95	36.7638	1787.2	16.1517	4813.03
K06/8/A	K6	K6/8	A	river current	river current Berula, Callitriche	river	2008	7	8	05.02. Ilybius fuliginosus	re	-	1	1	5	7.3	8.22	17.2	203	0.3	2.1	0.1	0.02	0.7	174	3.6	0.0018	100	7.72822	4.97925	4.04564	54.9274	3.99378	19.3983	4.40871	0.518672	55.395	44.605	1.10667	1.66303	13997.6	23.1104	11065.1	18.2688	4067.95	36.7638	1787.2	16.1517	4813.03
K06/8/A	K6	K6/8	A	river current	river current Berula, Callitriche	river	2008	7	8	05.02. Ilybius similis	sa	-	1	1	5	7.3	8.22	17.2	203	0.3	2.1	0.1	0.02	0.7	174	3.6	0.0018	100	7.72822	4.97925	4.04564	54.9274	3.99378	19.3983	4.40871	0.518672	55.395	44.605	1.10667	1.66303	13997.6	23.1104	11065.1	18.2688	4067.95	36.7638	1787.2	16.1517	4813.03
K06/8/A	K6	K6/8	A	river current	river current Berula, Callitriche	river	2008	7	8	05.04. Colymbetes paykulli	sa	-	1	1	5	7.3	8.22	17.2	203	0.3	2.1	0.1	0.02	0.7	174	3.6	0.0018	100	7.72822	4.97925	4.04564	54.9274	3.99378	19.3983	4.40871	0.518672	55.395	44.605	1.10667	1.66303	13997.6	23.1104	11065.1	18.2688	4067.95	36.7638	1787.2	16.1517	4813.03
K06/8/A	K6	K6/8	A	river current	river current Berula, Callitriche	river	2008	7	8	05.05. Rhantus suturalis	sb	-	3	3	5	7.3	8.22	17.2	203	0.3	2.1	0.1	0.02	0.7	174	3.6	0.0018	100	7.72822	4.97925	4.04564	54.9274	3.99378	19.3983	4.40871	0.518672	55.395	44.605	1.10667	1.66303	13997.6	23.1104	11065.1	18.2688	4067.95	36.7638	1787.2	16.1517	4813.03
K06/8/A	K6	K6/8	A	river current	river current Berula, Callitriche	river	2008	7	8	05.07. Acilius canaliculatus	sa	-	4	4	5	7.3	8.22	17.2	203	0.3	2.1	0.1	0.02	0.7	174	3.6	0.0018	100	7.72822	4.97925	4.04564	54.9274	3.99378	19.3983	4.40871	0.518672	55.395	44.605	1.10667	1.66303	13997.6	23.1104	11065.1	18.2688	4067.95	36.7638	1787.2	16.1517	4813.03
K06/8/A	K6	K6/8	A	river current	river current Berula, Callitriche	river	2008	7	8	05.16. Hydroporus incognitus	sa	-	1	1	5	7.3	8.22	17.2	203	0.3	2.1	0.1	0.02	0.7	174	3.6	0.0018	100	7.72822	4.97925	4.04564	54.9274	3.99378	19.3983	4.40871	0.518672	55.395	44.605	1.10667	1.66303	13997.6	23.1104	11065.1	18.2688	4067.95	36.7638	1787.2	16.1517	4813.03
K06/8/A	K6	K6/8	A	river current	river current Berula, Callitriche	river	2008	7	8	05.24. Hygrotus impressopunctatus	sb	-	1	1	5	7.3	8.22	17.2	203	0.3	2.1	0.1	0.02	0.7	174	3.6	0.0018	100	7.72822	4.97925	4.04564	54.9274	3.99378	19.3983	4.40871	0.518672	55.395	44.605	1.10667	1.66303	13997.6	23.1104	11065.1	18.2688	4067.95	36.7638	1787.2	16.1517	4813.03
K06/8/A	K6	K6/8	A	river current	river current Berula, Callitriche	river	2008	7	8	05.25. Hyphydrus ovatus	sb	-	3	3	5	7.3	8.22	17.2	203	0.3	2.1	0.1	0.02	0.7	174	3.6	0.0018	100	7.72822	4.97925	4.04564	54.9274	3.99378	19.3983	4.40871	0.518672	55.395	44.605	1.10667	1.66303	13997.6	23.1104	11065.1	18.2688	4067.95	36.7638	1787.2	16.1517	4813.03
K06/8/A	K6	K6/8	A	river current	river current Berula, Callitriche	river	2008	7	8	06.01. Helophorus granularis	sa	-	3	3	5	7.3	8.22	17.2	203	0.3	2.1	0.1	0.02	0.7	174	3.6	0.0018	100	7.72822	4.97925	4.04564	54.9274	3.99378	19.3983	4.40871	0.518672	55.395	44.605	1.10667	1.66303	13997.6	23.1104	11065.1	18.2688	4067.95	36.7638	1787.2	16.1517	4813.03
K06/8/A	K6	K6/8	A	river current	river current Berula, Callitriche	river	2008	7	8	10.08. Helochares obscurus	sb	-	1	1	5	7.3	8.22	17.2	203	0.3	2.1	0.1	0.02	0.7	174	3.6	0.0018	100	7.72822	4.97925	4.04564	54.9274	3.99378	19.3983	4.40871	0.518672	55.395	44.605	1.10667	1.66303	13997.6	23.1104	11065.1	18.2688	4067.95	36.7638	1787.2	16.1517	4813.03
K06/8/A	K6	K6/8	A	river current	river current Berula, Callitriche	river	2008	7	8	11.01. Hydraena palustris	sa	-	23	23	5	7.3	8.22	17.2	203	0.3	2.1	0.1	0.02	0.7	174	3.6	0.0018	100	7.72822	4.97925	4.04564	54.9274	3.99378	19.3983	4.40871	0.518672	55.395	44.605	1.10667	1.66303	13997.6	23.1104	11065.1	18.2688	4067.95	36.7638	1787.2	16.1517	4813.03
K06/8/A	K6	K6/8	A	river current	river current Berula, Callitriche	river	2008	7	8	11.02. Limnebius parvulus	sb	-	1	1	5	7.3	8.22	17.2	203	0.3	2.1	0.1	0.02	0.7	174	3.6	0.0018	100	7.72822	4.97925	4.04564	54.9274	3.99378	19.3983	4.40871	0.518672	55.395	44.605	1.10667	1.66303	13997.6	23.1104	11065.1	18.2688	4067.95	36.7638	1787.2	16.1517	4813.03
K06/8/A	K6	K6/8	A	river current	river current Berula	river	2008	8	6	02.02. Haliplus fluviatilis	re	-	2	2	5	8.7	5.75	15.9	261	1.2	3.9	0.4	0.01	3.7	166	4.3	0.1152	100	12.6588	4.389	5.15131	48.1173	4.8972	17.6715	4.4583	2.6565	40.4002	59.5998	0.993333	1.8753	13997.6	23.1104	11065.1	18.2688	4067.95	36.7638	1787.2	16.1517	4813.03
K06/8/A	K6	K6/8	A	river current	river current Berula	river	2008	8	6	02.02. Haliplus heydeni	sb	-	3	3	5	8.7	5.75	15.9	261	1.2	3.9	0.4	0.01	3.7	166	4.3	0.1152	100	12.6588	4.389	5.15131	48.1173	4.8972	17.6715	4.4583	2.6565	40.4002	59.5998	0.993333	1.8753	13997.6	23.1104	11065.1	18.2688	4067.95	36.7638	1787.2	16.1517	4813.03
K06/8/A	K6	K6/8	A	river current	river current Berula	river	2008	8	6	05.01. Agabus bipustulatus	sb	-	3	3	5	8.7	5.75	15.9	261	1.2	3.9	0.4	0.01	3.7	166	4.3	0.1152	100	12.6588	4.389	5.15131	48.1173	4.8972	17.6715	4.4583	2.6565	40.4002	59.5998	0.993333	1.8753	13997.6	23.1104	11065.1	18.2688	4067.95	36.7638	1787.2	16.1517	4813.03
K06/8/A	K6	K6/8	A	river current	river current Berula	river	2008	8	6	05.02. Ilybius fuliginosus	re	-	2	2	5	8.7	5.75	15.9	261	1.2	3.9	0.4	0.01	3.7	166	4.3	0.1152	100	12.6588	4.389	5.15131	48.1173	4.8972	17.6715	4.4583	2.6565	40.4002	59.5998	0.993333	1.8753	13997.6	23.1104	11065.1	18.2688	4067.95	36.7638	1787.2	16.1517	4813.03
K06/8/A	K6	K6/8	A	river current	river current Berula	river	2008	8	6	05.04. Colymbetes striatus	sa	-	1	1	5	8.7	5.75	15.9	261	1.2	3.9	0.4	0.01	3.7	166	4.3	0.1152	100	12.6588	4.389	5.15131	48.1173	4.8972	17.6715	4.4583	2.6565	40.4002	59.5998	0.993333	1.8753	13997.6	23.1104	11065.1	18.2688	4067.95	36.7638	1787.2	16.1517	4813.03
K06/8/A	K6	K6/8	A	river current	river current Berula	river	2008	8	6	05.11. Hydaticus seminiger	sb	-	3	3	5	8.7	5.75	15.9	261	1.2	3.9	0.4	0.01	3.7	166	4.3	0.1152	100	12.6588	4.389	5.15131	48.1173	4.8972	17.6715	4.4583	2.6565	40.4002	59.5998	0.993333	1.8753	13997.6	23.1104	11065.1	18.2688	4067.95	36.7638	1787.2	16.1517	4813.03
K06/8/A	K6	K6/8	A	river current	river current Berula	river	2008	8	6	05.24. Hygrotus inaequalis	sb	-	6	6	5	8.7	5.75	15.9	261	1.2	3.9	0.4	0.01	3.7	166	4.3	0.1152	100	12.6588	4.389	5.15131	48.1173	4.8972	17.6715	4.4583	2.6565	40.4002	59.5998	0.993333	1.8753	13997.6	23.1104	11065.1	18.2688	4067.95	36.7638	1787.2	16.1517	4813.03
K06/8/A	K6	K6/8	A	river current	river current Berula	river	2008	8	6	05.25. Hyphydrus ovatus	sb	1	-	1	5	8.7	5.75	15.9	261	1.2	3.9	0.4	0.01	3.7	166	4.3	0.1152	100	12.6588	4.389	5.15131	48.1173	4.8972	17.6715	4.4583	2.6565	40.4002	59.5998	0.993333	1.8753	13997.6	23.1104	11065.1	18.2688	4067.95	36.7638	1787.2	16.1517	4813.03
K06/8/A	K6	K6/8	A	river current	river current Berula	river	2008	8	6	05.27. Laccophilus hyalinus	re	-	1	1	5	8.7	5.75	15.9	261	1.2	3.9	0.4	0.01	3.7	166	4.3	0.1152	100	12.6588	4.389	5.15131	48.1173	4.8972	17.6715	4.4583	2.6565	40.4002	59.5998	0.993333	1.8753	13997.6	23.1104	11065.1	18.2688	4067.95	36.7638	1787.2	16.1517	4813.03
K06/8/A	K6	K6/8	A	river current	river current Berula	river	2008	8	6	10.11. Hydrochara caraboides	sb	-	1	1	5	8.7	5.75	15.9	261	1.2	3.9	0.4	0.01	3.7	166	4.3	0.1152	100	12.6588	4.389	5.15131	48.1173	4.8972	17.6715	4.4583	2.6565	40.4002	59.5998	0.993333	1.8753	13997.6	23.1104	11065.1	18.2688	4067.95	36.7638	1787.2	16.1517	4813.03
K06/8/A	K6	K6/8	A	river current	river current Berula	river	2008	8	6	11.01. Hydraena palustris	sa	-	5	5	5	8.7	5.75	15.9	261	1.2	3.9	0.4	0.01	3.7	166	4.3	0.1152	100	12.6588	4.389	5.15131	48.1173	4.8972	17.6715	4.4583	2.6565	40.4002	59.5998	0.993333	1.8753	13997.6	23.1104	11065.1	18.2688	4067.95	36.7638	1787.2	16.1517	4813.03
K06/8/A	K6	K6/8	A	river current	river current Berula	river	2008	8	6	18.01. Heterocerus sp.	sb	-	1	1	5	8.7	5.75	15.9	261	1.2	3.9	0.4	0.01	3.7	166	4.3	0.1152	100	12.6588	4.389	5.15131	48.1173	4.8972	17.6715	4.4583	2.6565	40.4002	59.5998	0.993333	1.8753	13997.6	23.1104	11065.1	18.2688	4067.95	36.7638	1787.2	16.1517	4813.03
K06/8/A	K6	K6/8	A	river current	river current Berula	river	2008	9	11	05.02. Ilybius fuliginosus	re	-	2	2	3	2.6	7.04	14.3	203	0.2	1.5	0.2	0.01	0	200	5.1	0.0017	100	3.25114	4.29224	3.25114	52.9315	8.73059	23.3059	2.52055	1.71689	37.0827	62.9173	1.10667	1.96606	13997.6	23.1104	11065.1	18.2688	4067.95	36.7638	1787.2	16.1517	4813.03
K06/8/A	K6	K6/8	A	river current	river current Berula	river	2008	9	11	05.04. Colymbetes striatus	sa	-	2	2	3	2.6	7.04	14.3	203	0.2	1.5	0.2	0.01	0	200	5.1	0.0017	100	3.25114	4.29224	3.25114	52.9315	8.73059	23.3059	2.52055	1.71689	37.0827	62.9173	1.10667	1.96606	13997.6	23.1104	11065.1	18.2688	4067.95	36.7638	1787.2	16.1517	4813.03
K06/8/A	K6	K6/8	A	river current	river current Berula	river	2008	9	11	05.16. Hydroporus incognitus	sa	-	1	1	3	2.6	7.04	14.3	203	0.2	1.5	0.2	0.01	0	200	5.1	0.0017	100	3.25114	4.29224	3.25114	52.9315	8.73059	23.3059	2.52055	1.71689	37.0827	62.9173	1.10667	1.96606	13997.6	23.1104	11065.1	18.2688	4067.95	36.7638	1787.2	16.1517	4813.03
K06/8/B	K6	K6/8	B	river current	river current Berula, Callitriche	river	2008	7	8	05.02. Ilybius fuliginosus	re	-	5	5	5	7.3	8.22	17.2	203	0.3	2.1	0.1	0.02	0.7	174	3.6	0.0018	100	7.72822	4.97925	4.04564	54.9274	3.99378	19.3983	4.40871	0.518672	55.395	44.605	1.10667	1.66303	13997.6	23.1104	11065.1	18.2688	4067.95	36.7638	1787.2	16.1517	4813.03
K06/8/B	K6	K6/8	B	river current	river current Berula, Callitriche	river	2008	7	8	05.02. Ilybius similis	sa	-	1	1	5	7.3	8.22	17.2	203	0.3	2.1	0.1	0.02	0.7	174	3.6	0.0018	100	7.72822	4.97925	4.04564	54.9274	3.99378	19.3983	4.40871	0.518672	55.395	44.605	1.10667	1.66303	13997.6	23.1104	11065.1	18.2688	4067.95	36.7638	1787.2	16.1517	4813.03
K06/8/B	K6	K6/8	B	river current	river current Berula, Callitriche	river	2008	7	8	05.04. Colymbetes striatus	sa	-	1	1	5	7.3	8.22	17.2	203	0.3	2.1	0.1	0.02	0.7	174	3.6	0.0018	100	7.72822	4.97925	4.04564	54.9274	3.99378	19.3983	4.40871	0.518672	55.395	44.605	1.10667	1.66303	13997.6	23.1104	11065.1	18.2688	4067.95	36.7638	1787.2	16.1517	4813.03
K06/8/B	K6	K6/8	B	river current	river current Berula, Callitriche	river	2008	7	8	05.05. Rhantus suturalis	sb	-	3	3	5	7.3	8.22	17.2	203	0.3	2.1	0.1	0.02	0.7	174	3.6	0.0018	100	7.72822	4.97925	4.04564	54.9274	3.99378	19.3983	4.40871	0.518672	55.395	44.605	1.10667	1.66303	13997.6	23.1104	11065.1	18.2688	4067.95	36.7638	1787.2	16.1517	4813.03
K06/8/B	K6	K6/8	B	river current	river current Berula, Callitriche	river	2008	7	8	05.07. Acilius canaliculatus	sa	-	4	4	5	7.3	8.22	17.2	203	0.3	2.1	0.1	0.02	0.7	174	3.6	0.0018	100	7.72822	4.97925	4.04564	54.9274	3.99378	19.3983	4.40871	0.518672	55.395	44.605	1.10667	1.66303	13997.6	23.1104	11065.1	18.2688	4067.95	36.7638	1787.2	16.1517	4813.03
K06/8/B	K6	K6/8	B	river current	river current Berula, Callitriche	river	2008	7	8	05.16. Hydroporus incognitus	sa	-	1	1	5	7.3	8.22	17.2	203	0.3	2.1	0.1	0.02	0.7	174	3.6	0.0018	100	7.72822	4.97925	4.04564	54.9274	3.99378	19.3983	4.40871	0.518672	55.395	44.605	1.10667	1.66303	13997.6	23.1104	11065.1	18.2688	4067.95	36.7638	1787.2	16.1517	4813.03
K06/8/B	K6	K6/8	B	river current	river current Berula, Callitriche	river	2008	7	8	05.25. Hyphydrus ovatus	sb	-	1	1	5	7.3	8.22	17.2	203	0.3	2.1	0.1	0.02	0.7	174	3.6	0.0018	100	7.72822	4.97925	4.04564	54.9274	3.99378	19.3983	4.40871	0.518672	55.395	44.605	1.10667	1.66303	13997.6	23.1104	11065.1	18.2688	4067.95	36.7638	1787.2	16.1517	4813.03
K06/8/B	K6	K6/8	B	river current	river current Berula, Callitriche	river	2008	7	8	06.01. Helophorus granularis	sa	-	1	1	5	7.3	8.22	17.2	203	0.3	2.1	0.1	0.02	0.7	174	3.6	0.0018	100	7.72822	4.97925	4.04564	54.9274	3.99378	19.3983	4.40871	0.518672	55.395	44.605	1.10667	1.66303	13997.6	23.1104	11065.1	18.2688	4067.95	36.7638	1787.2	16.1517	4813.03
K06/8/B	K6	K6/8	B	river current	river current Berula, Callitriche	river	2008	7	8	11.01. Hydraena palustris	sa	-	2	2	5	7.3	8.22	17.2	203	0.3	2.1	0.1	0.02	0.7	174	3.6	0.0018	100	7.72822	4.97925	4.04564	54.9274	3.99378	19.3983	4.40871	0.518672	55.395	44.605	1.10667	1.66303	13997.6	23.1104	11065.1	18.2688	4067.95	36.7638	1787.2	16.1517	4813.03
K06/8/B	K6	K6/8	B	river current	river current Berula	river	2008	8	5	05.01. Agabus paludosus	re	-	1	1	5	8.7	5.75	15.9	261	1.2	3.9	0.4	0.01	3.7	166	4.3	0.1152	100	12.6588	4.389	5.15131	48.1173	4.8972	17.6715	4.4583	2.6565	40.4002	59.5998	0.993333	1.8753	13997.6	23.1104	11065.1	18.2688	4067.95	36.7638	1787.2	16.1517	4813.03
K06/8/B	K6	K6/8	B	river current	river current Berula	river	2008	9	11	05.02. Ilybius ater	sa	-	1	1	3	2.6	7.04	14.3	203	0.2	1.5	0.2	0.01	0	200	5.1	0.0017	100	3.25114	4.29224	3.25114	52.9315	8.73059	23.3059	2.52055	1.71689	37.0827	62.9173	1.10667	1.96606	13997.6	23.1104	11065.1	18.2688	4067.95	36.7638	1787.2	16.1517	4813.03
K06/8/B	K6	K6/8	B	river current	river current Berula	river	2008	9	11	05.10. Dytiscus dimidiatus	sb	-	1	1	3	2.6	7.04	14.3	203	0.2	1.5	0.2	0.01	0	200	5.1	0.0017	100	3.25114	4.29224	3.25114	52.9315	8.73059	23.3059	2.52055	1.71689	37.0827	62.9173	1.10667	1.96606	13997.6	23.1104	11065.1	18.2688	4067.95	36.7638	1787.2	16.1517	4813.03
K06/8/B	K6	K6/8	B	river current	river current Berula	river	2008	9	11	06.01. Helophorus griseus	sa	-	1	1	3	2.6	7.04	14.3	203	0.2	1.5	0.2	0.01	0	200	5.1	0.0017	100	3.25114	4.29224	3.25114	52.9315	8.73059	23.3059	2.52055	1.71689	37.0827	62.9173	1.10667	1.96606	13997.6	23.1104	11065.1	18.2688	4067.95	36.7638	1787.2	16.1517	4813.03
K06/8/B	K6	K6/8	B	river current	river current Berula	river	2008	9	11	10.07. Enochrus testaceus	sb	-	1	1	3	2.6	7.04	14.3	203	0.2	1.5	0.2	0.01	0	200	5.1	0.0017	100	3.25114	4.29224	3.25114	52.9315	8.73059	23.3059	2.52055	1.71689	37.0827	62.9173	1.10667	1.96606	13997.6	23.1104	11065.1	18.2688	4067.95	36.7638	1787.2	16.1517	4813.03
K06/8/B	K6	K6/8	B	river current	river current Berula	river	2008	9	11	10.08. Helochares obscurus	sb	-	1	1	3	2.6	7.04	14.3	203	0.2	1.5	0.2	0.01	0	200	5.1	0.0017	100	3.25114	4.29224	3.25114	52.9315	8.73059	23.3059	2.52055	1.71689	37.0827	62.9173	1.10667	1.96606	13997.6	23.1104	11065.1	18.2688	4067.95	36.7638	1787.2	16.1517	4813.03
K06/8/B	K6	K6/8	B	river current	river current Berula	river	2008	9	11	11.01. Hydraena palustris	sa	-	1	1	3	2.6	7.04	14.3	203	0.2	1.5	0.2	0.01	0	200	5.1	0.0017	100	3.25114	4.29224	3.25114	52.9315	8.73059	23.3059	2.52055	1.71689	37.0827	62.9173	1.10667	1.96606	13997.6	23.1104	11065.1	18.2688	4067.95	36.7638	1787.2	16.1517	4813.03
K06/8/C	K6	K6/8	C	river current	river current Berula, Callitriche	river	2008	7	8	05.02. Ilybius fuliginosus	re	-	2	2	5	7.3	8.22	17.2	203	0.3	2.1	0.1	0.02	0.7	174	3.6	0.0018	100	7.72822	4.97925	4.04564	54.9274	3.99378	19.3983	4.40871	0.518672	55.395	44.605	1.10667	1.66303	13997.6	23.1104	11065.1	18.2688	4067.95	36.7638	1787.2	16.1517	4813.03
K06/8/C	K6	K6/8	C	river current	river current Berula, Callitriche	river	2008	7	8	05.07. Acilius canaliculatus	sa	-	2	2	5	7.3	8.22	17.2	203	0.3	2.1	0.1	0.02	0.7	174	3.6	0.0018	100	7.72822	4.97925	4.04564	54.9274	3.99378	19.3983	4.40871	0.518672	55.395	44.605	1.10667	1.66303	13997.6	23.1104	11065.1	18.2688	4067.95	36.7638	1787.2	16.1517	4813.03
K06/8/C	K6	K6/8	C	river current	river current Berula, Callitriche	river	2008	7	8	05.16. Hydroporus incognitus	sa	-	1	1	5	7.3	8.22	17.2	203	0.3	2.1	0.1	0.02	0.7	174	3.6	0.0018	100	7.72822	4.97925	4.04564	54.9274	3.99378	19.3983	4.40871	0.518672	55.395	44.605	1.10667	1.66303	13997.6	23.1104	11065.1	18.2688	4067.95	36.7638	1787.2	16.1517	4813.03
K06/8/C	K6	K6/8	C	river current	river current Berula, Callitriche	river	2008	7	8	05.24. Hygrotus inaequalis	sb	-	1	1	5	7.3	8.22	17.2	203	0.3	2.1	0.1	0.02	0.7	174	3.6	0.0018	100	7.72822	4.97925	4.04564	54.9274	3.99378	19.3983	4.40871	0.518672	55.395	44.605	1.10667	1.66303	13997.6	23.1104	11065.1	18.2688	4067.95	36.7638	1787.2	16.1517	4813.03
K06/8/C	K6	K6/8	C	river current	river current Berula, Callitriche	river	2008	7	8	05.25. Hyphydrus ovatus	sb	2	-	2	5	7.3	8.22	17.2	203	0.3	2.1	0.1	0.02	0.7	174	3.6	0.0018	100	7.72822	4.97925	4.04564	54.9274	3.99378	19.3983	4.40871	0.518672	55.395	44.605	1.10667	1.66303	13997.6	23.1104	11065.1	18.2688	4067.95	36.7638	1787.2	16.1517	4813.03
K06/8/C	K6	K6/8	C	river current	river current Berula, Callitriche	river	2008	7	8	06.01. Helophorus granularis	sa	-	6	6	5	7.3	8.22	17.2	203	0.3	2.1	0.1	0.02	0.7	174	3.6	0.0018	100	7.72822	4.97925	4.04564	54.9274	3.99378	19.3983	4.40871	0.518672	55.395	44.605	1.10667	1.66303	13997.6	23.1104	11065.1	18.2688	4067.95	36.7638	1787.2	16.1517	4813.03
K06/8/C	K6	K6/8	C	river current	river current Berula, Callitriche	river	2008	7	8	10.08. Helochares obscurus	sb	-	1	1	5	7.3	8.22	17.2	203	0.3	2.1	0.1	0.02	0.7	174	3.6	0.0018	100	7.72822	4.97925	4.04564	54.9274	3.99378	19.3983	4.40871	0.518672	55.395	44.605	1.10667	1.66303	13997.6	23.1104	11065.1	18.2688	4067.95	36.7638	1787.2	16.1517	4813.03
K06/8/C	K6	K6/8	C	river current	river current Berula, Callitriche	river	2008	7	8	10.11. Hydrochara caraboides	sb	-	1	1	5	7.3	8.22	17.2	203	0.3	2.1	0.1	0.02	0.7	174	3.6	0.0018	100	7.72822	4.97925	4.04564	54.9274	3.99378	19.3983	4.40871	0.518672	55.395	44.605	1.10667	1.66303	13997.6	23.1104	11065.1	18.2688	4067.95	36.7638	1787.2	16.1517	4813.03
K06/8/C	K6	K6/8	C	river current	river current Berula, Callitriche	river	2008	7	8	11.01. Hydraena palustris	sa	-	19	19	5	7.3	8.22	17.2	203	0.3	2.1	0.1	0.02	0.7	174	3.6	0.0018	100	7.72822	4.97925	4.04564	54.9274	3.99378	19.3983	4.40871	0.518672	55.395	44.605	1.10667	1.66303	13997.6	23.1104	11065.1	18.2688	4067.95	36.7638	1787.2	16.1517	4813.03
K06/8/C	K6	K6/8	C	river current	river current Berula, Callitriche	river	2008	7	8	11.02. Limnebius truncatellus	rb	-	1	1	5	7.3	8.22	17.2	203	0.3	2.1	0.1	0.02	0.7	174	3.6	0.0018	100	7.72822	4.97925	4.04564	54.9274	3.99378	19.3983	4.40871	0.518672	55.395	44.605	1.10667	1.66303	13997.6	23.1104	11065.1	18.2688	4067.95	36.7638	1787.2	16.1517	4813.03
K06/8/C	K6	K6/8	C	river current	river current Berula	river	2008	8	6	02.02. Haliplus fluviatilis	re	-	5	5	5	8.7	5.75	15.9	261	1.2	3.9	0.4	0.01	3.7	166	4.3	0.1152	100	12.6588	4.389	5.15131	48.1173	4.8972	17.6715	4.4583	2.6565	40.4002	59.5998	0.993333	1.8753	13997.6	23.1104	11065.1	18.2688	4067.95	36.7638	1787.2	16.1517	4813.03
K06/8/C	K6	K6/8	C	river current	river current Berula	river	2008	8	6	05.01. Agabus bipustulatus	sb	-	1	1	5	8.7	5.75	15.9	261	1.2	3.9	0.4	0.01	3.7	166	4.3	0.1152	100	12.6588	4.389	5.15131	48.1173	4.8972	17.6715	4.4583	2.6565	40.4002	59.5998	0.993333	1.8753	13997.6	23.1104	11065.1	18.2688	4067.95	36.7638	1787.2	16.1517	4813.03
K06/8/C	K6	K6/8	C	river current	river current Berula	river	2008	8	6	05.02. Ilybius fuliginosus	re	-	1	1	5	8.7	5.75	15.9	261	1.2	3.9	0.4	0.01	3.7	166	4.3	0.1152	100	12.6588	4.389	5.15131	48.1173	4.8972	17.6715	4.4583	2.6565	40.4002	59.5998	0.993333	1.8753	13997.6	23.1104	11065.1	18.2688	4067.95	36.7638	1787.2	16.1517	4813.03
K06/8/C	K6	K6/8	C	river current	river current Berula	river	2008	8	6	05.11. Hydaticus seminiger	sb	-	1	1	5	8.7	5.75	15.9	261	1.2	3.9	0.4	0.01	3.7	166	4.3	0.1152	100	12.6588	4.389	5.15131	48.1173	4.8972	17.6715	4.4583	2.6565	40.4002	59.5998	0.993333	1.8753	13997.6	23.1104	11065.1	18.2688	4067.95	36.7638	1787.2	16.1517	4813.03
K06/8/C	K6	K6/8	C	river current	river current Berula	river	2008	8	6	05.24. Hygrotus inaequalis	sb	-	1	1	5	8.7	5.75	15.9	261	1.2	3.9	0.4	0.01	3.7	166	4.3	0.1152	100	12.6588	4.389	5.15131	48.1173	4.8972	17.6715	4.4583	2.6565	40.4002	59.5998	0.993333	1.8753	13997.6	23.1104	11065.1	18.2688	4067.95	36.7638	1787.2	16.1517	4813.03
K06/8/C	K6	K6/8	C	river current	river current Berula	river	2008	8	6	10.01. Anacaena limbata	sb	-	1	1	5	8.7	5.75	15.9	261	1.2	3.9	0.4	0.01	3.7	166	4.3	0.1152	100	12.6588	4.389	5.15131	48.1173	4.8972	17.6715	4.4583	2.6565	40.4002	59.5998	0.993333	1.8753	13997.6	23.1104	11065.1	18.2688	4067.95	36.7638	1787.2	16.1517	4813.03
K06/8/C	K6	K6/8	C	river current	river current Berula	river	2008	8	6	10.11. Hydrochara caraboides	sb	-	2	2	5	8.7	5.75	15.9	261	1.2	3.9	0.4	0.01	3.7	166	4.3	0.1152	100	12.6588	4.389	5.15131	48.1173	4.8972	17.6715	4.4583	2.6565	40.4002	59.5998	0.993333	1.8753	13997.6	23.1104	11065.1	18.2688	4067.95	36.7638	1787.2	16.1517	4813.03
K06/8/C	K6	K6/8	C	river current	river current Berula	river	2008	8	6	11.01. Hydraena palustris	sa	-	2	2	5	8.7	5.75	15.9	261	1.2	3.9	0.4	0.01	3.7	166	4.3	0.1152	100	12.6588	4.389	5.15131	48.1173	4.8972	17.6715	4.4583	2.6565	40.4002	59.5998	0.993333	1.8753	13997.6	23.1104	11065.1	18.2688	4067.95	36.7638	1787.2	16.1517	4813.03
K06/8/C	K6	K6/8	C	river current	river current Berula	river	2008	9	11	02.02. Haliplus fluviatilis	re	-	2	2	3	2.6	7.04	14.3	203	0.2	1.5	0.2	0.01	0	200	5.1	0.0017	100	3.25114	4.29224	3.25114	52.9315	8.73059	23.3059	2.52055	1.71689	37.0827	62.9173	1.10667	1.96606	13997.6	23.1104	11065.1	18.2688	4067.95	36.7638	1787.2	16.1517	4813.03
K06/8/C	K6	K6/8	C	river current	river current Berula	river	2008	9	11	05.01. Agabus bipustulatus	sb	-	1	1	3	2.6	7.04	14.3	203	0.2	1.5	0.2	0.01	0	200	5.1	0.0017	100	3.25114	4.29224	3.25114	52.9315	8.73059	23.3059	2.52055	1.71689	37.0827	62.9173	1.10667	1.96606	13997.6	23.1104	11065.1	18.2688	4067.95	36.7638	1787.2	16.1517	4813.03
K06/8/C	K6	K6/8	C	river current	river current Berula	river	2008	9	11	05.01. Agabus sp.	sb	1	-	1	3	2.6	7.04	14.3	203	0.2	1.5	0.2	0.01	0	200	5.1	0.0017	100	3.25114	4.29224	3.25114	52.9315	8.73059	23.3059	2.52055	1.71689	37.0827	62.9173	1.10667	1.96606	13997.6	23.1104	11065.1	18.2688	4067.95	36.7638	1787.2	16.1517	4813.03
K06/8/C	K6	K6/8	C	river current	river current Berula	river	2008	9	11	05.02. Ilybius fuliginosus	re	-	1	1	3	2.6	7.04	14.3	203	0.2	1.5	0.2	0.01	0	200	5.1	0.0017	100	3.25114	4.29224	3.25114	52.9315	8.73059	23.3059	2.52055	1.71689	37.0827	62.9173	1.10667	1.96606	13997.6	23.1104	11065.1	18.2688	4067.95	36.7638	1787.2	16.1517	4813.03
K06/8/C	K6	K6/8	C	river current	river current Berula	river	2008	9	11	05.16. Hydroporus incognitus	sa	-	1	1	3	2.6	7.04	14.3	203	0.2	1.5	0.2	0.01	0	200	5.1	0.0017	100	3.25114	4.29224	3.25114	52.9315	8.73059	23.3059	2.52055	1.71689	37.0827	62.9173	1.10667	1.96606	13997.6	23.1104	11065.1	18.2688	4067.95	36.7638	1787.2	16.1517	4813.03
K06/8/C	K6	K6/8	C	river current	river current Berula	river	2008	9	11	05.16. Hydroporus obscurus	sa	-	1	1	3	2.6	7.04	14.3	203	0.2	1.5	0.2	0.01	0	200	5.1	0.0017	100	3.25114	4.29224	3.25114	52.9315	8.73059	23.3059	2.52055	1.71689	37.0827	62.9173	1.10667	1.96606	13997.6	23.1104	11065.1	18.2688	4067.95	36.7638	1787.2	16.1517	4813.03
K06/8/C	K6	K6/8	C	river current	river current Berula	river	2008	9	11	05.19. Porhydrus lineatus	sa	-	1	1	3	2.6	7.04	14.3	203	0.2	1.5	0.2	0.01	0	200	5.1	0.0017	100	3.25114	4.29224	3.25114	52.9315	8.73059	23.3059	2.52055	1.71689	37.0827	62.9173	1.10667	1.96606	13997.6	23.1104	11065.1	18.2688	4067.95	36.7638	1787.2	16.1517	4813.03
K06/8/C	K6	K6/8	C	river current	river current Berula	river	2008	9	11	05.27. Laccophilus hyalinus	re	-	1	1	3	2.6	7.04	14.3	203	0.2	1.5	0.2	0.01	0	200	5.1	0.0017	100	3.25114	4.29224	3.25114	52.9315	8.73059	23.3059	2.52055	1.71689	37.0827	62.9173	1.10667	1.96606	13997.6	23.1104	11065.1	18.2688	4067.95	36.7638	1787.2	16.1517	4813.03
K06/8/C	K6	K6/8	C	river current	river current Berula	river	2008	9	11	06.01. Helophorus minutus	sa	-	1	1	3	2.6	7.04	14.3	203	0.2	1.5	0.2	0.01	0	200	5.1	0.0017	100	3.25114	4.29224	3.25114	52.9315	8.73059	23.3059	2.52055	1.71689	37.0827	62.9173	1.10667	1.96606	13997.6	23.1104	11065.1	18.2688	4067.95	36.7638	1787.2	16.1517	4813.03
K06/8/C	K6	K6/8	C	river current	river current Berula	river	2008	9	11	10.01. Anacaena limbata	sb	-	1	1	3	2.6	7.04	14.3	203	0.2	1.5	0.2	0.01	0	200	5.1	0.0017	100	3.25114	4.29224	3.25114	52.9315	8.73059	23.3059	2.52055	1.71689	37.0827	62.9173	1.10667	1.96606	13997.6	23.1104	11065.1	18.2688	4067.95	36.7638	1787.2	16.1517	4813.03
K06/8/C	K6	K6/8	C	river current	river current Berula	river	2008	9	11	10.11. Hydrochara caraboides	sb	-	3	3	3	2.6	7.04	14.3	203	0.2	1.5	0.2	0.01	0	200	5.1	0.0017	100	3.25114	4.29224	3.25114	52.9315	8.73059	23.3059	2.52055	1.71689	37.0827	62.9173	1.10667	1.96606	13997.6	23.1104	11065.1	18.2688	4067.95	36.7638	1787.2	16.1517	4813.03
K06/8/C	K6	K6/8	C	river current	river current Berula	river	2008	9	11	11.01. Hydraena palustris	sa	-	1	1	3	2.6	7.04	14.3	203	0.2	1.5	0.2	0.01	0	200	5.1	0.0017	100	3.25114	4.29224	3.25114	52.9315	8.73059	23.3059	2.52055	1.71689	37.0827	62.9173	1.10667	1.96606	13997.6	23.1104	11065.1	18.2688	4067.95	36.7638	1787.2	16.1517	4813.03
K08/1/A	K8	K8/1	A	river current	river current plants, sand	river	2008	9	11	06.01. Helophorus granularis	sa	-	1	1	2	8.6	7.01	14.9	214	0.2	2	0.3	0.02	0	95	5.5	0.091	29.5633	4.44148	2.34745	3.95465	25.2084	6.33545	51.2237	5.44848	1.04035	7.24136	92.7586	1.24667	1.96606	21163.4	34.9414	4363.4	7.2041	479.55	10.9903	806.8	18.4902	2987.65
K08/1/A	K8	K8/1	A	river current	river current plants, sand	river	2008	7	9	11.01. Hydraena palustris	sa	-	5	5	2	8.3	8.1	17.1	203	1.3	3.6	0.2	0.03	2.2	209	5	0.1463	70.6349	6.20308	2.80603	3.02433	28.7258	8.63106	45.4555	3.43432	1.71982	2.89066	97.1093	1.24667	1.66303	21163.4	34.9414	4363.4	7.2041	479.55	10.9903	806.8	18.4902	2987.65
K08/1/A	K8	K8/1	A	river current	in front of the river dam	river	2008	8	6	05.01. Agabus didymus	kr	-	1	1	2	7.6	5.85	16.5	255	1.2	2.4	0.4	0.14	4.8	166	3.8	0.0805	87.0787	4.44148	2.34745	3.95465	25.2084	6.33545	51.2237	5.44848	1.04035	7.16525	92.8348	1.24667	1.96606	21163.4	34.9414	4363.4	7.2041	479.55	10.9903	806.8	18.4902	2987.65
K08/1/A	K8	K8/1	A	river current	in front of the river dam	river	2008	8	6	05.07. Acilius canaliculatus	sa	-	1	1	2	7.6	5.85	16.5	255	1.2	2.4	0.4	0.14	4.8	166	3.8	0.0805	87.0787	4.44148	2.34745	3.95465	25.2084	6.33545	51.2237	5.44848	1.04035	7.16525	92.8348	1.24667	1.96606	21163.4	34.9414	4363.4	7.2041	479.55	10.9903	806.8	18.4902	2987.65
K08/1/A	K8	K8/1	A	river current	in front of the river dam	river	2008	8	6	05.25. Hyphydrus ovatus	sb	-	1	1	2	7.6	5.85	16.5	255	1.2	2.4	0.4	0.14	4.8	166	3.8	0.0805	87.0787	4.44148	2.34745	3.95465	25.2084	6.33545	51.2237	5.44848	1.04035	7.16525	92.8348	1.24667	1.96606	21163.4	34.9414	4363.4	7.2041	479.55	10.9903	806.8	18.4902	2987.65
K08/1/A	K8	K8/1	A	river current	in front of the river dam	river	2008	8	6	11.01. Hydraena palustris	sa	-	7	7	2	7.6	5.85	16.5	255	1.2	2.4	0.4	0.14	4.8	166	3.8	0.0805	87.0787	4.44148	2.34745	3.95465	25.2084	6.33545	51.2237	5.44848	1.04035	7.16525	92.8348	1.24667	1.96606	21163.4	34.9414	4363.4	7.2041	479.55	10.9903	806.8	18.4902	2987.65
K08/1/A	K8	K8/1	A	river current	in front of the river dam	river	2008	8	6	16.01. Donacia sparganii	sb	-	1	1	2	7.6	5.85	16.5	255	1.2	2.4	0.4	0.14	4.8	166	3.8	0.0805	87.0787	4.44148	2.34745	3.95465	25.2084	6.33545	51.2237	5.44848	1.04035	7.16525	92.8348	1.24667	1.96606	21163.4	34.9414	4363.4	7.2041	479.55	10.9903	806.8	18.4902	2987.65
K08/1/A	K8	K8/1	A	river current	river current plants, sand	river	2008	9	11	11.01. Hydraena palustris	sa	-	9	9	2	8.6	7.01	14.9	214	0.2	2	0.3	0.02	0	95	5.5	0.091	29.5633	4.44148	2.34745	3.95465	25.2084	6.33545	51.2237	5.44848	1.04035	7.24136	92.7586	1.24667	1.96606	21163.4	34.9414	4363.4	7.2041	479.55	10.9903	806.8	18.4902	2987.65
K08/1/B	K8	K8/1	B	river current	river current plants, sand	river	2008	7	9	02.02. Haliplus fluviatilis	re	-	1	1	2	8.3	8.1	17.1	203	1.3	3.6	0.2	0.03	2.2	209	5	0.1463	70.6349	6.20308	2.80603	3.02433	28.7258	8.63106	45.4555	3.43432	1.71982	2.89066	97.1093	1.24667	1.66303	21163.4	34.9414	4363.4	7.2041	479.55	10.9903	806.8	18.4902	2987.65
K08/1/B	K8	K8/1	B	river current	river current plants, sand	river	2008	7	9	05.02. Ilybius fuliginosus	re	-	3	3	2	8.3	8.1	17.1	203	1.3	3.6	0.2	0.03	2.2	209	5	0.1463	70.6349	6.20308	2.80603	3.02433	28.7258	8.63106	45.4555	3.43432	1.71982	2.89066	97.1093	1.24667	1.66303	21163.4	34.9414	4363.4	7.2041	479.55	10.9903	806.8	18.4902	2987.65
K08/1/B	K8	K8/1	B	river current	river current plants, sand	river	2008	7	9	05.11. Hydaticus seminiger	sb	-	1	1	2	8.3	8.1	17.1	203	1.3	3.6	0.2	0.03	2.2	209	5	0.1463	70.6349	6.20308	2.80603	3.02433	28.7258	8.63106	45.4555	3.43432	1.71982	2.89066	97.1093	1.24667	1.66303	21163.4	34.9414	4363.4	7.2041	479.55	10.9903	806.8	18.4902	2987.65
K08/1/B	K8	K8/1	B	river current	river current plants, sand	river	2008	7	9	05.27. Laccophilus hyalinus	re	-	2	2	2	8.3	8.1	17.1	203	1.3	3.6	0.2	0.03	2.2	209	5	0.1463	70.6349	6.20308	2.80603	3.02433	28.7258	8.63106	45.4555	3.43432	1.71982	2.89066	97.1093	1.24667	1.66303	21163.4	34.9414	4363.4	7.2041	479.55	10.9903	806.8	18.4902	2987.65
K08/1/B	K8	K8/1	B	river current	river current plants, sand	river	2008	7	9	10.09. Hydrobius fuscipes	sb	-	1	1	2	8.3	8.1	17.1	203	1.3	3.6	0.2	0.03	2.2	209	5	0.1463	70.6349	6.20308	2.80603	3.02433	28.7258	8.63106	45.4555	3.43432	1.71982	2.89066	97.1093	1.24667	1.66303	21163.4	34.9414	4363.4	7.2041	479.55	10.9903	806.8	18.4902	2987.65
K08/1/B	K8	K8/1	B	river current	river current plants, sand	river	2008	7	9	11.01. Hydraena palustris	sa	-	1	1	2	8.3	8.1	17.1	203	1.3	3.6	0.2	0.03	2.2	209	5	0.1463	70.6349	6.20308	2.80603	3.02433	28.7258	8.63106	45.4555	3.43432	1.71982	2.89066	97.1093	1.24667	1.66303	21163.4	34.9414	4363.4	7.2041	479.55	10.9903	806.8	18.4902	2987.65
K08/1/B	K8	K8/1	B	river current	river current plants, sand	river	2008	7	9	12.05. Oulimnius tuberculatus	rb	-	1	1	2	8.3	8.1	17.1	203	1.3	3.6	0.2	0.03	2.2	209	5	0.1463	70.6349	6.20308	2.80603	3.02433	28.7258	8.63106	45.4555	3.43432	1.71982	2.89066	97.1093	1.24667	1.66303	21163.4	34.9414	4363.4	7.2041	479.55	10.9903	806.8	18.4902	2987.65
K08/1/B	K8	K8/1	B	river current	in front of the river dam, sand	river	2008	8	5	05.02. Ilybius fuliginosus	re	-	1	1	2	7.6	5.85	16.5	255	1.2	2.4	0.4	0.14	4.8	166	3.8	0.0805	87.0787	4.44148	2.34745	3.95465	25.2084	6.33545	51.2237	5.44848	1.04035	7.16525	92.8348	1.24667	1.96606	21163.4	34.9414	4363.4	7.2041	479.55	10.9903	806.8	18.4902	2987.65
K08/1/B	K8	K8/1	B	river current	in front of the river dam, sand	river	2008	8	5	05.02. Ilybius quadriguttatus	sa	-	1	1	2	7.6	5.85	16.5	255	1.2	2.4	0.4	0.14	4.8	166	3.8	0.0805	87.0787	4.44148	2.34745	3.95465	25.2084	6.33545	51.2237	5.44848	1.04035	7.16525	92.8348	1.24667	1.96606	21163.4	34.9414	4363.4	7.2041	479.55	10.9903	806.8	18.4902	2987.65
K08/1/B	K8	K8/1	B	river current	in front of the river dam, sand	river	2008	8	5	05.07. Acilius canaliculatus	sa	-	2	2	2	7.6	5.85	16.5	255	1.2	2.4	0.4	0.14	4.8	166	3.8	0.0805	87.0787	4.44148	2.34745	3.95465	25.2084	6.33545	51.2237	5.44848	1.04035	7.16525	92.8348	1.24667	1.96606	21163.4	34.9414	4363.4	7.2041	479.55	10.9903	806.8	18.4902	2987.65
K08/1/B	K8	K8/1	B	river current	in front of the river dam, sand	river	2008	8	5	05.08. Graphoderus austriacus	sb	-	1	1	2	7.6	5.85	16.5	255	1.2	2.4	0.4	0.14	4.8	166	3.8	0.0805	87.0787	4.44148	2.34745	3.95465	25.2084	6.33545	51.2237	5.44848	1.04035	7.16525	92.8348	1.24667	1.96606	21163.4	34.9414	4363.4	7.2041	479.55	10.9903	806.8	18.4902	2987.65
K08/1/B	K8	K8/1	B	river current	in front of the river dam, sand	river	2008	8	5	05.25. Hyphydrus ovatus	sb	-	2	2	2	7.6	5.85	16.5	255	1.2	2.4	0.4	0.14	4.8	166	3.8	0.0805	87.0787	4.44148	2.34745	3.95465	25.2084	6.33545	51.2237	5.44848	1.04035	7.16525	92.8348	1.24667	1.96606	21163.4	34.9414	4363.4	7.2041	479.55	10.9903	806.8	18.4902	2987.65
K08/1/B	K8	K8/1	B	river current	in front of the river dam, sand	river	2008	8	5	05.27. Laccophilus hyalinus	re	-	1	1	2	7.6	5.85	16.5	255	1.2	2.4	0.4	0.14	4.8	166	3.8	0.0805	87.0787	4.44148	2.34745	3.95465	25.2084	6.33545	51.2237	5.44848	1.04035	7.16525	92.8348	1.24667	1.96606	21163.4	34.9414	4363.4	7.2041	479.55	10.9903	806.8	18.4902	2987.65
K08/1/B	K8	K8/1	B	river current	in front of the river dam, sand	river	2008	8	5	11.01. Hydraena palustris	sa	-	9	9	2	7.6	5.85	16.5	255	1.2	2.4	0.4	0.14	4.8	166	3.8	0.0805	87.0787	4.44148	2.34745	3.95465	25.2084	6.33545	51.2237	5.44848	1.04035	7.16525	92.8348	1.24667	1.96606	21163.4	34.9414	4363.4	7.2041	479.55	10.9903	806.8	18.4902	2987.65
K08/1/B	K8	K8/1	B	river current	river current plants, sand	river	2008	9	11	11.01. Hydraena palustris	sa	-	3	3	2	8.6	7.01	14.9	214	0.2	2	0.3	0.02	0	95	5.5	0.091	29.5633	4.44148	2.34745	3.95465	25.2084	6.33545	51.2237	5.44848	1.04035	7.24136	92.7586	1.24667	1.96606	21163.4	34.9414	4363.4	7.2041	479.55	10.9903	806.8	18.4902	2987.65
K08/1/C	K8	K8/1	C	river current	in front of the river dam	river	2008	5	5	05.16. Hydroporus palustris	sb	-	1	1	1	7.4	8.7	15.2	159	1	0.4	0.3	0.1	6.4	233	4.4	0.1043	100	11.1919	3.83476	2.57446	30.6404	4.83115	42.1931	3.05381	1.6804	3.71516	96.2848	0.993333	1.74803	21163.4	34.9414	4363.4	7.2041	479.55	10.9903	806.8	18.4902	2987.65
K08/1/C	K8	K8/1	C	river current	river current plants, sand	river	2008	7	9	05.02. Ilybius fuliginosus	re	-	1	1	2	8.3	8.1	17.1	203	1.3	3.6	0.2	0.03	2.2	209	5	0.1463	70.6349	6.20308	2.80603	3.02433	28.7258	8.63106	45.4555	3.43432	1.71982	2.89066	97.1093	1.24667	1.66303	21163.4	34.9414	4363.4	7.2041	479.55	10.9903	806.8	18.4902	2987.65
K08/1/C	K8	K8/1	C	river current	river current plants, sand	river	2008	7	9	05.07. Acilius canaliculatus	sa	-	1	1	2	8.3	8.1	17.1	203	1.3	3.6	0.2	0.03	2.2	209	5	0.1463	70.6349	6.20308	2.80603	3.02433	28.7258	8.63106	45.4555	3.43432	1.71982	2.89066	97.1093	1.24667	1.66303	21163.4	34.9414	4363.4	7.2041	479.55	10.9903	806.8	18.4902	2987.65
K08/1/C	K8	K8/1	C	river current	in front of the river dam, sand	river	2008	8	6	05.04. Colymbetes striatus	sa	-	1	1	2	7.6	5.85	16.5	255	1.2	2.4	0.4	0.14	4.8	166	3.8	0.0805	87.0787	4.44148	2.34745	3.95465	25.2084	6.33545	51.2237	5.44848	1.04035	7.16525	92.8348	1.24667	1.96606	21163.4	34.9414	4363.4	7.2041	479.55	10.9903	806.8	18.4902	2987.65
K08/1/C	K8	K8/1	C	river current	in front of the river dam, sand	river	2008	8	6	05.07. Acilius canaliculatus	sa	-	1	1	2	7.6	5.85	16.5	255	1.2	2.4	0.4	0.14	4.8	166	3.8	0.0805	87.0787	4.44148	2.34745	3.95465	25.2084	6.33545	51.2237	5.44848	1.04035	7.16525	92.8348	1.24667	1.96606	21163.4	34.9414	4363.4	7.2041	479.55	10.9903	806.8	18.4902	2987.65
K08/1/C	K8	K8/1	C	river current	river current plants, sand	river	2008	9	11	11.01. Hydraena palustris	sa	-	4	4	2	8.6	7.01	14.9	214	0.2	2	0.3	0.02	0	95	5.5	0.091	29.5633	4.44148	2.34745	3.95465	25.2084	6.33545	51.2237	5.44848	1.04035	7.24136	92.7586	1.24667	1.96606	21163.4	34.9414	4363.4	7.2041	479.55	10.9903	806.8	18.4902	2987.65
K08/1/C	K8	K8/1	C	river current	in front of the river dam	river	2008	10	14	05.16. Hydroporus palustris	sb	-	1	1	2	7.7	7.58	11.1	257	0.4	3	0.3	0	8.3	219	5.9	0.0446	100	4.04796	2.03408	4.43187	24.1261	6.14266	52.7985	5.28053	1.13828	4.39396	95.606	1.24667	1.96606	21163.4	34.9414	4363.4	7.2041	479.55	10.9903	806.8	18.4902	2987.65
K08/2/A	K8	K8/2	A	river pocket water	river pocket behind the river dam	river	2008	4	17	15.01. Tanysphyrus lemnae	sb	-	3	3	4	9.3	7.6	6.4	287	0.7	0.4	0.1	0.2	69.5	180	3.6	0.0047	100	0	2.21548	3.06525	28.6191	4.00607	28.6798	4.73445	28.6798	30.4545	69.5455	2.05333	2.33667	21163.4	34.9414	4363.4	7.2041	479.55	10.9903	806.8	18.4902	2987.65
K08/2/A	K8	K8/2	A	river pocket water	river pocket behind the river dam	river	2008	6	4	05.13. Hydroglyphus geminus	sa	-	1	1	4	5.7	7.8	19.2	173	0.4	10.7	0.6	0.4	17.2	103	3.9	0.0014	86.9231	1.25056	3.72934	2.30013	24.2742	13.1532	28.4725	4.73426	22.0858	35.5557	64.4443	1.52667	2.38818	21163.4	34.9414	4363.4	7.2041	479.55	10.9903	806.8	18.4902	2987.65
K08/2/A	K8	K8/2	A	river pocket water	river pocket behind the river dam	river	2008	7	9	02.02. Haliplus fluviatilis	re	-	1	1	4	8.3	8.1	17.1	203	1.3	3.6	0.2	0.03	2.2	209	5.8	-0.0028	100	0	0	0	30.6698	3.96592	31.0223	6.58049	27.7615	35.5557	64.4443	1.52667	2.33667	21163.4	34.9414	4363.4	7.2041	479.55	10.9903	806.8	18.4902	2987.65
K08/2/A	K8	K8/2	A	river pocket water	river pocket behind the river dam	river	2008	7	9	05.05. Rhantus suturalis	sb	-	6	6	4	8.3	8.1	17.1	203	1.3	3.6	0.2	0.03	2.2	209	5.8	-0.0028	100	0	0	0	30.6698	3.96592	31.0223	6.58049	27.7615	35.5557	64.4443	1.52667	2.33667	21163.4	34.9414	4363.4	7.2041	479.55	10.9903	806.8	18.4902	2987.65
K08/2/A	K8	K8/2	A	river pocket water	river pocket behind the river dam	river	2008	7	9	05.11. Hydaticus seminiger	sb	-	1	1	4	8.3	8.1	17.1	203	1.3	3.6	0.2	0.03	2.2	209	5.8	-0.0028	100	0	0	0	30.6698	3.96592	31.0223	6.58049	27.7615	35.5557	64.4443	1.52667	2.33667	21163.4	34.9414	4363.4	7.2041	479.55	10.9903	806.8	18.4902	2987.65
K08/2/A	K8	K8/2	A	river pocket water	river pocket behind the river dam	river	2008	7	9	05.16. Hydroporus incognitus	sa	-	1	1	4	8.3	8.1	17.1	203	1.3	3.6	0.2	0.03	2.2	209	5.8	-0.0028	100	0	0	0	30.6698	3.96592	31.0223	6.58049	27.7615	35.5557	64.4443	1.52667	2.33667	21163.4	34.9414	4363.4	7.2041	479.55	10.9903	806.8	18.4902	2987.65
K08/2/A	K8	K8/2	A	river pocket water	river pocket behind the river dam	river	2008	7	9	14.01. Cyphon sp.	sb	1	-	1	4	8.3	8.1	17.1	203	1.3	3.6	0.2	0.03	2.2	209	5.8	-0.0028	100	0	0	0	30.6698	3.96592	31.0223	6.58049	27.7615	35.5557	64.4443	1.52667	2.33667	21163.4	34.9414	4363.4	7.2041	479.55	10.9903	806.8	18.4902	2987.65
K08/2/A	K8	K8/2	A	river pocket water	river pocket behind the river dam	river	2008	8	6	02.02. Haliplus fluviatilis	re	-	1	1	4	7.6	5.85	16.5	255	1.2	2.4	0.4	0.14	4.8	166	4.4	0.0031	78.6517	0.38262	0.389105	1.07652	13.2879	4.09209	69.9027	9.03372	1.83528	3.99315	96.0069	2.12667	1.3303	21163.4	34.9414	4363.4	7.2041	479.55	10.9903	806.8	18.4902	2987.65
K08/2/A	K8	K8/2	A	river pocket water	river pocket behind the river dam	river	2008	8	6	05.02. Ilybius fuliginosus	re	-	7	7	4	7.6	5.85	16.5	255	1.2	2.4	0.4	0.14	4.8	166	4.4	0.0031	78.6517	0.38262	0.389105	1.07652	13.2879	4.09209	69.9027	9.03372	1.83528	3.99315	96.0069	2.12667	1.3303	21163.4	34.9414	4363.4	7.2041	479.55	10.9903	806.8	18.4902	2987.65
K08/2/A	K8	K8/2	A	river pocket water	river pocket behind the river dam	river	2008	8	6	05.04. Colymbetes striatus	sa	-	1	1	4	7.6	5.85	16.5	255	1.2	2.4	0.4	0.14	4.8	166	4.4	0.0031	78.6517	0.38262	0.389105	1.07652	13.2879	4.09209	69.9027	9.03372	1.83528	3.99315	96.0069	2.12667	1.3303	21163.4	34.9414	4363.4	7.2041	479.55	10.9903	806.8	18.4902	2987.65
K08/2/A	K8	K8/2	A	river pocket water	river pocket behind the river dam	river	2008	8	6	05.07. Acilius canaliculatus	sa	-	3	3	4	7.6	5.85	16.5	255	1.2	2.4	0.4	0.14	4.8	166	4.4	0.0031	78.6517	0.38262	0.389105	1.07652	13.2879	4.09209	69.9027	9.03372	1.83528	3.99315	96.0069	2.12667	1.3303	21163.4	34.9414	4363.4	7.2041	479.55	10.9903	806.8	18.4902	2987.65
K08/2/A	K8	K8/2	A	river pocket water	river pocket behind the river dam	river	2008	8	6	05.10. Dytiscus circumcintus	sb	-	1	1	4	7.6	5.85	16.5	255	1.2	2.4	0.4	0.14	4.8	166	4.4	0.0031	78.6517	0.38262	0.389105	1.07652	13.2879	4.09209	69.9027	9.03372	1.83528	3.99315	96.0069	2.12667	1.3303	21163.4	34.9414	4363.4	7.2041	479.55	10.9903	806.8	18.4902	2987.65
K08/2/A	K8	K8/2	A	river pocket water	river pocket water	river	2008	9	11	02.02. Haliplus fluviatilis	re	-	1	1	4	8.6	7.01	14.9	214	0.2	2	0.3	0.02	0	95	5.1	-0.0021	29.5633	0.38262	0.389105	1.07652	13.2879	4.09209	69.9027	9.03372	1.83528	3.99315	96.0069	2.12667	1.3303	21163.4	34.9414	4363.4	7.2041	479.55	10.9903	806.8	18.4902	2987.65
K08/2/A	K8	K8/2	A	river pocket water	river pocket behind the river dam	river	2008	9	11	05.02. Ilybius fuliginosus	re	-	2	2	4	8.6	7.01	14.9	214	0.2	2	0.3	0.02	0	95	5.1	-0.0021	29.5633	0.38262	0.389105	1.07652	13.2879	4.09209	69.9027	9.03372	1.83528	3.99315	96.0069	2.12667	1.3303	21163.4	34.9414	4363.4	7.2041	479.55	10.9903	806.8	18.4902	2987.65
K08/2/A	K8	K8/2	A	river pocket water	river pocket behind the river dam	river	2008	9	11	05.07. Acilius sulcatus	sb	-	2	2	4	8.6	7.01	14.9	214	0.2	2	0.3	0.02	0	95	5.1	-0.0021	29.5633	0.38262	0.389105	1.07652	13.2879	4.09209	69.9027	9.03372	1.83528	3.99315	96.0069	2.12667	1.3303	21163.4	34.9414	4363.4	7.2041	479.55	10.9903	806.8	18.4902	2987.65
K08/2/A	K8	K8/2	A	river pocket water	river pocket water	river	2008	9	11	05.24. Hygrotus inaequalis	sb	-	2	2	4	8.6	7.01	14.9	214	0.2	2	0.3	0.02	0	95	5.1	-0.0021	29.5633	0.38262	0.389105	1.07652	13.2879	4.09209	69.9027	9.03372	1.83528	3.99315	96.0069	2.12667	1.3303	21163.4	34.9414	4363.4	7.2041	479.55	10.9903	806.8	18.4902	2987.65
K08/2/A	K8	K8/2	A	river pocket water	river pocket water	river	2008	9	11	05.25. Hyphydrus ovatus	sb	-	2	2	4	8.6	7.01	14.9	214	0.2	2	0.3	0.02	0	95	5.1	-0.0021	29.5633	0.38262	0.389105	1.07652	13.2879	4.09209	69.9027	9.03372	1.83528	3.99315	96.0069	2.12667	1.3303	21163.4	34.9414	4363.4	7.2041	479.55	10.9903	806.8	18.4902	2987.65
K08/2/A	K8	K8/2	A	river pocket water	river pocket behind the river dam	river	2008	9	11	11.01. Hydraena palustris	sa	-	2	2	4	8.6	7.01	14.9	214	0.2	2	0.3	0.02	0	95	5.1	-0.0021	29.5633	0.38262	0.389105	1.07652	13.2879	4.09209	69.9027	9.03372	1.83528	3.99315	96.0069	2.12667	1.3303	21163.4	34.9414	4363.4	7.2041	479.55	10.9903	806.8	18.4902	2987.65
K08/2/A	K8	K8/2	A	river pocket water	river pocket behind the river dam	river	2008	9	11	11.03. Ochthebius minimus	sb	-	2	2	4	8.6	7.01	14.9	214	0.2	2	0.3	0.02	0	95	5.1	-0.0021	29.5633	0.38262	0.389105	1.07652	13.2879	4.09209	69.9027	9.03372	1.83528	3.99315	96.0069	2.12667	1.3303	21163.4	34.9414	4363.4	7.2041	479.55	10.9903	806.8	18.4902	2987.65
K08/2/A	K8	K8/2	A	river pocket water	river pocket behind the river dam	river	2008	10	14	05.01. Agabus bipustulatus	sb	-	1	1	4	7.7	7.58	11.1	257	0.4	3	0.3	0	8.3	219	5.7	0.0037	100	16.6474	1.42172	1.32253	15.4736	7.30699	49.4131	5.80261	2.612	9.65431	90.3457	1.68667	1.4603	21163.4	34.9414	4363.4	7.2041	479.55	10.9903	806.8	18.4902	2987.65
K08/2/A	K8	K8/2	A	river pocket water	river pocket behind the river dam	river	2008	10	14	05.04. Colymbetes striatus	sa	-	1	1	4	7.7	7.58	11.1	257	0.4	3	0.3	0	8.3	219	5.7	0.0037	100	16.6474	1.42172	1.32253	15.4736	7.30699	49.4131	5.80261	2.612	9.65431	90.3457	1.68667	1.4603	21163.4	34.9414	4363.4	7.2041	479.55	10.9903	806.8	18.4902	2987.65
K08/2/A	K8	K8/2	A	river pocket water	river pocket behind the river dam	river	2008	10	14	05.15. Graptodytes granularis	sb	-	1	1	4	7.7	7.58	11.1	257	0.4	3	0.3	0	8.3	219	5.7	0.0037	100	16.6474	1.42172	1.32253	15.4736	7.30699	49.4131	5.80261	2.612	9.65431	90.3457	1.68667	1.4603	21163.4	34.9414	4363.4	7.2041	479.55	10.9903	806.8	18.4902	2987.65
K08/2/A	K8	K8/2	A	river pocket water	river pocket behind the river dam	river	2008	10	14	05.16. Hydroporus incognitus	sa	-	1	1	4	7.7	7.58	11.1	257	0.4	3	0.3	0	8.3	219	5.7	0.0037	100	16.6474	1.42172	1.32253	15.4736	7.30699	49.4131	5.80261	2.612	9.65431	90.3457	1.68667	1.4603	21163.4	34.9414	4363.4	7.2041	479.55	10.9903	806.8	18.4902	2987.65
K08/2/A	K8	K8/2	A	river pocket water	river pocket behind the river dam	river	2008	10	14	05.25. Hyphydrus ovatus	sb	-	3	3	4	7.7	7.58	11.1	257	0.4	3	0.3	0	8.3	219	5.7	0.0037	100	16.6474	1.42172	1.32253	15.4736	7.30699	49.4131	5.80261	2.612	9.65431	90.3457	1.68667	1.4603	21163.4	34.9414	4363.4	7.2041	479.55	10.9903	806.8	18.4902	2987.65
K08/2/A	K8	K8/2	A	river pocket water	river pocket behind the river dam	river	2008	10	14	05.27. Laccophilus hyalinus	re	-	2	2	4	7.7	7.58	11.1	257	0.4	3	0.3	0	8.3	219	5.7	0.0037	100	16.6474	1.42172	1.32253	15.4736	7.30699	49.4131	5.80261	2.612	9.65431	90.3457	1.68667	1.4603	21163.4	34.9414	4363.4	7.2041	479.55	10.9903	806.8	18.4902	2987.65
K08/2/A	K8	K8/2	A	river pocket water	river pocket behind the river dam	river	2008	10	14	10.07. Enochrus coarctatus	sa	-	1	1	4	7.7	7.58	11.1	257	0.4	3	0.3	0	8.3	219	5.7	0.0037	100	16.6474	1.42172	1.32253	15.4736	7.30699	49.4131	5.80261	2.612	9.65431	90.3457	1.68667	1.4603	21163.4	34.9414	4363.4	7.2041	479.55	10.9903	806.8	18.4902	2987.65
K08/2/A	K8	K8/2	A	river pocket water	river pocket behind the river dam	river	2008	10	14	10.09. Hydrobius fuscipes	sb	-	1	1	4	7.7	7.58	11.1	257	0.4	3	0.3	0	8.3	219	5.7	0.0037	100	16.6474	1.42172	1.32253	15.4736	7.30699	49.4131	5.80261	2.612	9.65431	90.3457	1.68667	1.4603	21163.4	34.9414	4363.4	7.2041	479.55	10.9903	806.8	18.4902	2987.65
K08/2/A	K8	K8/2	A	river pocket water	river pocket behind the river dam	river	2008	10	14	11.01. Hydraena palustris	sa	-	3	3	4	7.7	7.58	11.1	257	0.4	3	0.3	0	8.3	219	5.7	0.0037	100	16.6474	1.42172	1.32253	15.4736	7.30699	49.4131	5.80261	2.612	9.65431	90.3457	1.68667	1.4603	21163.4	34.9414	4363.4	7.2041	479.55	10.9903	806.8	18.4902	2987.65
K08/2/A	K8	K8/2	A	river pocket water	river pocket behind the river dam	river	2008	10	14	11.02. Limnebius parvulus	sb	-	1	1	4	7.7	7.58	11.1	257	0.4	3	0.3	0	8.3	219	5.7	0.0037	100	16.6474	1.42172	1.32253	15.4736	7.30699	49.4131	5.80261	2.612	9.65431	90.3457	1.68667	1.4603	21163.4	34.9414	4363.4	7.2041	479.55	10.9903	806.8	18.4902	2987.65
K08/2/B	K8	K8/2	B	river pocket water	river pocket behind the river dam	river	2008	8	9	02.02. Haliplus fluviatilis	re	-	1	1	4	7.6	5.85	16.5	255	1.2	2.4	0.4	0.14	4.8	166	4.4	0.0031	78.6517	0.38262	0.389105	1.07652	13.2879	4.09209	69.9027	9.03372	1.83528	3.99315	96.0069	2.12667	1.3303	21163.4	34.9414	4363.4	7.2041	479.55	10.9903	806.8	18.4902	2987.65
K08/2/B	K8	K8/2	B	river pocket water	river pocket behind the river dam	river	2008	8	9	05.04. Colymbetes striatus	sa	-	2	2	4	7.6	5.85	16.5	255	1.2	2.4	0.4	0.14	4.8	166	4.4	0.0031	78.6517	0.38262	0.389105	1.07652	13.2879	4.09209	69.9027	9.03372	1.83528	3.99315	96.0069	2.12667	1.3303	21163.4	34.9414	4363.4	7.2041	479.55	10.9903	806.8	18.4902	2987.65
K08/2/B	K8	K8/2	B	river pocket water	river pocket behind the river dam	river	2008	8	9	05.07. Acilius canaliculatus	sa	-	2	2	4	7.6	5.85	16.5	255	1.2	2.4	0.4	0.14	4.8	166	4.4	0.0031	78.6517	0.38262	0.389105	1.07652	13.2879	4.09209	69.9027	9.03372	1.83528	3.99315	96.0069	2.12667	1.3303	21163.4	34.9414	4363.4	7.2041	479.55	10.9903	806.8	18.4902	2987.65
K08/2/B	K8	K8/2	B	river pocket water	river pocket behind the river dam	river	2008	8	9	05.10. Dytiscus dimidiatus	sb	-	1	1	4	7.6	5.85	16.5	255	1.2	2.4	0.4	0.14	4.8	166	4.4	0.0031	78.6517	0.38262	0.389105	1.07652	13.2879	4.09209	69.9027	9.03372	1.83528	3.99315	96.0069	2.12667	1.3303	21163.4	34.9414	4363.4	7.2041	479.55	10.9903	806.8	18.4902	2987.65
K08/2/B	K8	K8/2	B	river pocket water	river pocket behind the river dam	river	2008	8	9	05.11. Hydaticus seminiger	sb	-	3	3	4	7.6	5.85	16.5	255	1.2	2.4	0.4	0.14	4.8	166	4.4	0.0031	78.6517	0.38262	0.389105	1.07652	13.2879	4.09209	69.9027	9.03372	1.83528	3.99315	96.0069	2.12667	1.3303	21163.4	34.9414	4363.4	7.2041	479.55	10.9903	806.8	18.4902	2987.65
K08/2/B	K8	K8/2	B	river pocket water	river pocket behind the river dam	river	2008	8	9	05.25. Hyphydrus ovatus	sb	-	1	1	4	7.6	5.85	16.5	255	1.2	2.4	0.4	0.14	4.8	166	4.4	0.0031	78.6517	0.38262	0.389105	1.07652	13.2879	4.09209	69.9027	9.03372	1.83528	3.99315	96.0069	2.12667	1.3303	21163.4	34.9414	4363.4	7.2041	479.55	10.9903	806.8	18.4902	2987.65
K08/2/B	K8	K8/2	B	river pocket water	river pocket behind the river dam	river	2008	8	9	10.15. Cercyon bifenestratus	sb	-	1	1	4	7.6	5.85	16.5	255	1.2	2.4	0.4	0.14	4.8	166	4.4	0.0031	78.6517	0.38262	0.389105	1.07652	13.2879	4.09209	69.9027	9.03372	1.83528	3.99315	96.0069	2.12667	1.3303	21163.4	34.9414	4363.4	7.2041	479.55	10.9903	806.8	18.4902	2987.65
K08/2/B	K8	K8/2	B	river pocket water	river pocket behind the river dam	river	2008	8	9	11.01. Hydraena palustris	sa	-	3	3	4	7.6	5.85	16.5	255	1.2	2.4	0.4	0.14	4.8	166	4.4	0.0031	78.6517	0.38262	0.389105	1.07652	13.2879	4.09209	69.9027	9.03372	1.83528	3.99315	96.0069	2.12667	1.3303	21163.4	34.9414	4363.4	7.2041	479.55	10.9903	806.8	18.4902	2987.65
K08/2/B	K8	K8/2	B	river pocket water	river pocket behind the river dam	river	2008	8	9	11.01. Hydraena palustris	sa	-	3	3	4	7.6	5.85	16.5	255	1.2	2.4	0.4	0.14	4.8	166	4.4	0.0031	78.6517	0.38262	0.389105	1.07652	13.2879	4.09209	69.9027	9.03372	1.83528	3.99315	96.0069	2.12667	1.3303	21163.4	34.9414	4363.4	7.2041	479.55	10.9903	806.8	18.4902	2987.65
K08/2/B	K8	K8/2	B	river pocket water	river pocket water	river	2008	9	11	05.02. Ilybius fuliginosus	re	-	5	5	4	8.6	7.01	14.9	214	0.2	2	0.3	0.02	0	95	5.1	-0.0021	29.5633	0.38262	0.389105	1.07652	13.2879	4.09209	69.9027	9.03372	1.83528	3.99315	96.0069	2.12667	1.3303	21163.4	34.9414	4363.4	7.2041	479.55	10.9903	806.8	18.4902	2987.65
K08/2/B	K8	K8/2	B	river pocket water	river pocket water	river	2008	9	11	05.04. Colymbetes fuscus	sb	-	2	2	4	8.6	7.01	14.9	214	0.2	2	0.3	0.02	0	95	5.1	-0.0021	29.5633	0.38262	0.389105	1.07652	13.2879	4.09209	69.9027	9.03372	1.83528	3.99315	96.0069	2.12667	1.3303	21163.4	34.9414	4363.4	7.2041	479.55	10.9903	806.8	18.4902	2987.65
K08/2/B	K8	K8/2	B	river pocket water	river pocket water	river	2008	9	11	05.04. Colymbetes striatus	sa	-	2	2	4	8.6	7.01	14.9	214	0.2	2	0.3	0.02	0	95	5.1	-0.0021	29.5633	0.38262	0.389105	1.07652	13.2879	4.09209	69.9027	9.03372	1.83528	3.99315	96.0069	2.12667	1.3303	21163.4	34.9414	4363.4	7.2041	479.55	10.9903	806.8	18.4902	2987.65
K08/2/B	K8	K8/2	B	river pocket water	river pocket water	river	2008	9	11	05.07. Acilius canaliculatus	sa	-	2	2	4	8.6	7.01	14.9	214	0.2	2	0.3	0.02	0	95	5.1	-0.0021	29.5633	0.38262	0.389105	1.07652	13.2879	4.09209	69.9027	9.03372	1.83528	3.99315	96.0069	2.12667	1.3303	21163.4	34.9414	4363.4	7.2041	479.55	10.9903	806.8	18.4902	2987.65
K08/2/B	K8	K8/2	B	river pocket water	river pocket water	river	2008	9	11	05.07. Acilius sulcatus	sb	-	1	1	4	8.6	7.01	14.9	214	0.2	2	0.3	0.02	0	95	5.1	-0.0021	29.5633	0.38262	0.389105	1.07652	13.2879	4.09209	69.9027	9.03372	1.83528	3.99315	96.0069	2.12667	1.3303	21163.4	34.9414	4363.4	7.2041	479.55	10.9903	806.8	18.4902	2987.65
K08/2/B	K8	K8/2	B	river pocket water	river pocket water	river	2008	9	11	05.25. Hyphydrus ovatus	sb	-	2	2	4	8.6	7.01	14.9	214	0.2	2	0.3	0.02	0	95	5.1	-0.0021	29.5633	0.38262	0.389105	1.07652	13.2879	4.09209	69.9027	9.03372	1.83528	3.99315	96.0069	2.12667	1.3303	21163.4	34.9414	4363.4	7.2041	479.55	10.9903	806.8	18.4902	2987.65
K08/2/B	K8	K8/2	B	river pocket water	river pocket water	river	2008	9	11	11.01. Hydraena palustris	sa	-	1	1	4	8.6	7.01	14.9	214	0.2	2	0.3	0.02	0	95	5.1	-0.0021	29.5633	0.38262	0.389105	1.07652	13.2879	4.09209	69.9027	9.03372	1.83528	3.99315	96.0069	2.12667	1.3303	21163.4	34.9414	4363.4	7.2041	479.55	10.9903	806.8	18.4902	2987.65
K08/2/B	K8	K8/2	B	river pocket water	river pocket behind the river dam	river	2008	10	24	05.04. Colymbetes fuscus	sb	-	3	3	4	7.7	7.58	11.1	257	0.4	3	0.3	0	8.3	219	5.7	0.0037	100	16.6474	1.42172	1.32253	15.4736	7.30699	49.4131	5.80261	2.612	9.65431	90.3457	1.68667	1.4603	21163.4	34.9414	4363.4	7.2041	479.55	10.9903	806.8	18.4902	2987.65
K08/2/B	K8	K8/2	B	river pocket water	river pocket behind the river dam	river	2008	10	24	05.04. Colymbetes striatus	sa	-	1	1	4	7.7	7.58	11.1	257	0.4	3	0.3	0	8.3	219	5.7	0.0037	100	16.6474	1.42172	1.32253	15.4736	7.30699	49.4131	5.80261	2.612	9.65431	90.3457	1.68667	1.4603	21163.4	34.9414	4363.4	7.2041	479.55	10.9903	806.8	18.4902	2987.65
K08/2/B	K8	K8/2	B	river pocket water	river pocket behind the river dam	river	2008	10	24	05.07. Acilius canaliculatus	sa	-	1	1	4	7.7	7.58	11.1	257	0.4	3	0.3	0	8.3	219	5.7	0.0037	100	16.6474	1.42172	1.32253	15.4736	7.30699	49.4131	5.80261	2.612	9.65431	90.3457	1.68667	1.4603	21163.4	34.9414	4363.4	7.2041	479.55	10.9903	806.8	18.4902	2987.65
K08/2/B	K8	K8/2	B	river pocket water	river pocket behind the river dam	river	2008	10	24	05.07. Acilius sulcatus	sb	-	5	5	4	7.7	7.58	11.1	257	0.4	3	0.3	0	8.3	219	5.7	0.0037	100	16.6474	1.42172	1.32253	15.4736	7.30699	49.4131	5.80261	2.612	9.65431	90.3457	1.68667	1.4603	21163.4	34.9414	4363.4	7.2041	479.55	10.9903	806.8	18.4902	2987.65
K08/2/B	K8	K8/2	B	river pocket water	river pocket behind the river dam	river	2008	10	24	05.10. Dytiscus marginalis	sb	-	1	1	4	7.7	7.58	11.1	257	0.4	3	0.3	0	8.3	219	5.7	0.0037	100	16.6474	1.42172	1.32253	15.4736	7.30699	49.4131	5.80261	2.612	9.65431	90.3457	1.68667	1.4603	21163.4	34.9414	4363.4	7.2041	479.55	10.9903	806.8	18.4902	2987.65
K08/2/B	K8	K8/2	B	river pocket water	river pocket behind the river dam	river	2008	10	24	05.25. Hyphydrus ovatus	sb	-	2	2	4	7.7	7.58	11.1	257	0.4	3	0.3	0	8.3	219	5.7	0.0037	100	16.6474	1.42172	1.32253	15.4736	7.30699	49.4131	5.80261	2.612	9.65431	90.3457	1.68667	1.4603	21163.4	34.9414	4363.4	7.2041	479.55	10.9903	806.8	18.4902	2987.65
K08/2/C	K8	K8/2	C	river pocket water	river pocket behind the river dam	river	2008	8	6	02.02. Haliplus fluviatilis	re	-	1	1	4	7.6	5.85	16.5	255	1.2	2.4	0.4	0.14	4.8	166	4.4	0.0031	78.6517	0.38262	0.389105	1.07652	13.2879	4.09209	69.9027	9.03372	1.83528	3.99315	96.0069	2.12667	1.3303	21163.4	34.9414	4363.4	7.2041	479.55	10.9903	806.8	18.4902	2987.65
K08/2/C	K8	K8/2	C	river pocket water	river pocket behind the river dam	river	2008	8	6	02.02. Haliplus ruficollis	sb	-	1	1	4	7.6	5.85	16.5	255	1.2	2.4	0.4	0.14	4.8	166	4.4	0.0031	78.6517	0.38262	0.389105	1.07652	13.2879	4.09209	69.9027	9.03372	1.83528	3.99315	96.0069	2.12667	1.3303	21163.4	34.9414	4363.4	7.2041	479.55	10.9903	806.8	18.4902	2987.65
K08/2/C	K8	K8/2	C	river pocket water	river pocket behind the river dam	river	2008	8	6	05.02. Ilybius fuliginosus	re	-	2	2	4	7.6	5.85	16.5	255	1.2	2.4	0.4	0.14	4.8	166	4.4	0.0031	78.6517	0.38262	0.389105	1.07652	13.2879	4.09209	69.9027	9.03372	1.83528	3.99315	96.0069	2.12667	1.3303	21163.4	34.9414	4363.4	7.2041	479.55	10.9903	806.8	18.4902	2987.65
K08/2/C	K8	K8/2	C	river pocket water	river pocket behind the river dam	river	2008	8	6	05.07. Acilius canaliculatus	sa	-	2	2	4	7.6	5.85	16.5	255	1.2	2.4	0.4	0.14	4.8	166	4.4	0.0031	78.6517	0.38262	0.389105	1.07652	13.2879	4.09209	69.9027	9.03372	1.83528	3.99315	96.0069	2.12667	1.3303	21163.4	34.9414	4363.4	7.2041	479.55	10.9903	806.8	18.4902	2987.65
K08/2/C	K8	K8/2	C	river pocket water	river pocket behind the river dam	river	2008	8	6	05.24. Hygrotus inaequalis	sb	-	1	1	4	7.6	5.85	16.5	255	1.2	2.4	0.4	0.14	4.8	166	4.4	0.0031	78.6517	0.38262	0.389105	1.07652	13.2879	4.09209	69.9027	9.03372	1.83528	3.99315	96.0069	2.12667	1.3303	21163.4	34.9414	4363.4	7.2041	479.55	10.9903	806.8	18.4902	2987.65
K08/2/C	K8	K8/2	C	river pocket water	river pocket behind the river dam	river	2008	8	6	11.01. Hydraena palustris	sa	-	1	1	4	7.6	5.85	16.5	255	1.2	2.4	0.4	0.14	4.8	166	4.4	0.0031	78.6517	0.38262	0.389105	1.07652	13.2879	4.09209	69.9027	9.03372	1.83528	3.99315	96.0069	2.12667	1.3303	21163.4	34.9414	4363.4	7.2041	479.55	10.9903	806.8	18.4902	2987.65
K08/2/C	K8	K8/2	C	river pocket water	river pocket behind the river dam	river	2008	9	11	05.02. Ilybius fuliginosus	re	-	5	5	4	8.6	7.01	14.9	214	0.2	2	0.3	0.02	0	95	5.1	-0.0021	29.5633	0.38262	0.389105	1.07652	13.2879	4.09209	69.9027	9.03372	1.83528	3.99315	96.0069	2.12667	1.3303	21163.4	34.9414	4363.4	7.2041	479.55	10.9903	806.8	18.4902	2987.65
K08/2/C	K8	K8/2	C	river pocket water	river pocket behind the river dam	river	2008	9	11	05.04. Colymbetes fuscus	sb	-	8	8	4	8.6	7.01	14.9	214	0.2	2	0.3	0.02	0	95	5.1	-0.0021	29.5633	0.38262	0.389105	1.07652	13.2879	4.09209	69.9027	9.03372	1.83528	3.99315	96.0069	2.12667	1.3303	21163.4	34.9414	4363.4	7.2041	479.55	10.9903	806.8	18.4902	2987.65
K08/2/C	K8	K8/2	C	river pocket water	river pocket behind the river dam	river	2008	9	11	05.04. Colymbetes striatus	sa	-	2	2	4	8.6	7.01	14.9	214	0.2	2	0.3	0.02	0	95	5.1	-0.0021	29.5633	0.38262	0.389105	1.07652	13.2879	4.09209	69.9027	9.03372	1.83528	3.99315	96.0069	2.12667	1.3303	21163.4	34.9414	4363.4	7.2041	479.55	10.9903	806.8	18.4902	2987.65
K08/2/C	K8	K8/2	C	river pocket water	river pocket behind the river dam	river	2008	9	11	05.07. Acilius canaliculatus	sa	-	3	3	4	8.6	7.01	14.9	214	0.2	2	0.3	0.02	0	95	5.1	-0.0021	29.5633	0.38262	0.389105	1.07652	13.2879	4.09209	69.9027	9.03372	1.83528	3.99315	96.0069	2.12667	1.3303	21163.4	34.9414	4363.4	7.2041	479.55	10.9903	806.8	18.4902	2987.65
K08/2/C	K8	K8/2	C	river pocket water	river pocket behind the river dam	river	2008	9	11	05.25. Hyphydrus ovatus	sb	-	5	5	4	8.6	7.01	14.9	214	0.2	2	0.3	0.02	0	95	5.1	-0.0021	29.5633	0.38262	0.389105	1.07652	13.2879	4.09209	69.9027	9.03372	1.83528	3.99315	96.0069	2.12667	1.3303	21163.4	34.9414	4363.4	7.2041	479.55	10.9903	806.8	18.4902	2987.65
K08/2/C	K8	K8/2	C	river pocket water	river pocket behind the river dam	river	2008	9	11	11.02. Limnebius parvulus	sb	-	1	1	4	8.6	7.01	14.9	214	0.2	2	0.3	0.02	0	95	5.1	-0.0021	29.5633	0.38262	0.389105	1.07652	13.2879	4.09209	69.9027	9.03372	1.83528	3.99315	96.0069	2.12667	1.3303	21163.4	34.9414	4363.4	7.2041	479.55	10.9903	806.8	18.4902	2987.65
K08/2/C	K8	K8/2	C	river pocket water	river pocket behind the river dam	river	2008	10	14	05.01. Agabus sp.	sb	1	-	1	4	7.7	7.58	11.1	257	0.4	3	0.3	0	8.3	219	5.7	0.0037	100	16.6474	1.42172	1.32253	15.4736	7.30699	49.4131	5.80261	2.612	9.65431	90.3457	1.68667	1.4603	21163.4	34.9414	4363.4	7.2041	479.55	10.9903	806.8	18.4902	2987.65
K08/2/C	K8	K8/2	C	river pocket water	river pocket behind the river dam	river	2008	10	14	05.04. Colymbetes fuscus	sb	-	1	1	4	7.7	7.58	11.1	257	0.4	3	0.3	0	8.3	219	5.7	0.0037	100	16.6474	1.42172	1.32253	15.4736	7.30699	49.4131	5.80261	2.612	9.65431	90.3457	1.68667	1.4603	21163.4	34.9414	4363.4	7.2041	479.55	10.9903	806.8	18.4902	2987.65
K08/2/C	K8	K8/2	C	river pocket water	river pocket behind the river dam	river	2008	10	14	05.04. Colymbetes striatus	sa	-	3	3	4	7.7	7.58	11.1	257	0.4	3	0.3	0	8.3	219	5.7	0.0037	100	16.6474	1.42172	1.32253	15.4736	7.30699	49.4131	5.80261	2.612	9.65431	90.3457	1.68667	1.4603	21163.4	34.9414	4363.4	7.2041	479.55	10.9903	806.8	18.4902	2987.65
K08/2/C	K8	K8/2	C	river pocket water	river pocket behind the river dam	river	2008	10	14	05.07. Acilius canaliculatus	sa	-	1	1	4	7.7	7.58	11.1	257	0.4	3	0.3	0	8.3	219	5.7	0.0037	100	16.6474	1.42172	1.32253	15.4736	7.30699	49.4131	5.80261	2.612	9.65431	90.3457	1.68667	1.4603	21163.4	34.9414	4363.4	7.2041	479.55	10.9903	806.8	18.4902	2987.65
K08/2/C	K8	K8/2	C	river pocket water	river pocket behind the river dam	river	2008	10	14	05.24. Hygrotus inaequalis	sb	-	1	1	4	7.7	7.58	11.1	257	0.4	3	0.3	0	8.3	219	5.7	0.0037	100	16.6474	1.42172	1.32253	15.4736	7.30699	49.4131	5.80261	2.612	9.65431	90.3457	1.68667	1.4603	21163.4	34.9414	4363.4	7.2041	479.55	10.9903	806.8	18.4902	2987.65
K08/2/C	K8	K8/2	C	river pocket water	river pocket behind the river dam	river	2008	10	14	05.27. Laccophilus hyalinus	re	-	5	5	4	7.7	7.58	11.1	257	0.4	3	0.3	0	8.3	219	5.7	0.0037	100	16.6474	1.42172	1.32253	15.4736	7.30699	49.4131	5.80261	2.612	9.65431	90.3457	1.68667	1.4603	21163.4	34.9414	4363.4	7.2041	479.55	10.9903	806.8	18.4902	2987.65
K08/2/C	K8	K8/2	C	river pocket water	river pocket behind the river dam	river	2008	10	14	08.01. Hydrochus brevis	sb	-	1	1	4	7.7	7.58	11.1	257	0.4	3	0.3	0	8.3	219	5.7	0.0037	100	16.6474	1.42172	1.32253	15.4736	7.30699	49.4131	5.80261	2.612	9.65431	90.3457	1.68667	1.4603	21163.4	34.9414	4363.4	7.2041	479.55	10.9903	806.8	18.4902	2987.65
K08/2/C	K8	K8/2	C	river pocket water	river pocket behind the river dam	river	2008	10	14	11.03. Ochthebius minimus	sb	-	1	1	4	7.7	7.58	11.1	257	0.4	3	0.3	0	8.3	219	5.7	0.0037	100	16.6474	1.42172	1.32253	15.4736	7.30699	49.4131	5.80261	2.612	9.65431	90.3457	1.68667	1.4603	21163.4	34.9414	4363.4	7.2041	479.55	10.9903	806.8	18.4902	2987.65
K08/2/A	K8	K8/2	A	river pocket water	river pocket behind the river dam	river	2008	9	7	05.10. Dytiscus dimidiatus	sb	-	1	1	4	8.6	7.01	14.9	214	0.2	2	0.3	0.02	0	95	5.1	-0.0021	29.5633	0.38262	0.389105	1.07652	13.2879	4.09209	69.9027	9.03372	1.83528	3.99315	96.0069	2.12667	1.3303	21163.4	34.9414	4363.4	7.2041	479.55	10.9903	806.8	18.4902	2987.65
K08/3/A	K8	K8/3	A	river pocket water	river current in front of the dam	river	2008	4	17	05.16. Hydroporus palustris	sb	-	3	3	3	9.3	7.6	6.4	287	0.7	0.4	0.1	0.2	69.5	180	3.9	0.0047	100	4.99562	1.4461	1.92813	32.603	7.4277	41.2686	7.16477	3.16608	12.5818	87.4182	1.24667	2.09333	21163.4	34.9414	4363.4	7.2041	479.55	10.9903	806.8	18.4902	2987.65
K08/3/A	K8	K8/3	A	river pocket water	river current in front of the dam	river	2008	4	17	05.25. Hyphydrus ovatus	sb	-	1	1	3	9.3	7.6	6.4	287	0.7	0.4	0.1	0.2	69.5	180	3.9	0.0047	100	4.99562	1.4461	1.92813	32.603	7.4277	41.2686	7.16477	3.16608	12.5818	87.4182	1.24667	2.09333	21163.4	34.9414	4363.4	7.2041	479.55	10.9903	806.8	18.4902	2987.65
K08/3/A	K8	K8/3	A	river pocket water	river current in front of the dam	river	2008	4	17	10.07. Enochrus melanocephalus	sa	-	1	1	3	9.3	7.6	6.4	287	0.7	0.4	0.1	0.2	69.5	180	3.9	0.0047	100	4.99562	1.4461	1.92813	32.603	7.4277	41.2686	7.16477	3.16608	12.5818	87.4182	1.24667	2.09333	21163.4	34.9414	4363.4	7.2041	479.55	10.9903	806.8	18.4902	2987.65
K08/3/A	K8	K8/3	A	river pocket water	river current in front of the dam	river	2008	6	4	02.02. Haliplus fluviatilis	re	-	1	1	5	3.8	6.9	7.6	173	0.4	10.7	0.6	0.4	17.2	103	3.7	0.0042	86.9231	4.80655	2.30951	1.84564	33.4485	7.24437	39.3703	7.78721	3.18792	12.5818	87.4182	1.24667	2.09333	21163.4	34.9414	4363.4	7.2041	479.55	10.9903	806.8	18.4902	2987.65
K08/3/A	K8	K8/3	A	river pocket water	river current in front of the dam	river	2008	6	4	03.01. Noterus crassicornis	sb	-	2	2	5	3.8	6.9	7.6	173	0.4	10.7	0.6	0.4	17.2	103	3.7	0.0042	86.9231	4.80655	2.30951	1.84564	33.4485	7.24437	39.3703	7.78721	3.18792	12.5818	87.4182	1.24667	2.09333	21163.4	34.9414	4363.4	7.2041	479.55	10.9903	806.8	18.4902	2987.65
K08/3/A	K8	K8/3	A	river pocket water	river current in front of the dam	river	2008	6	4	05.16. Hydroporus incognitus	sa	-	2	2	5	3.8	6.9	7.6	173	0.4	10.7	0.6	0.4	17.2	103	3.7	0.0042	86.9231	4.80655	2.30951	1.84564	33.4485	7.24437	39.3703	7.78721	3.18792	12.5818	87.4182	1.24667	2.09333	21163.4	34.9414	4363.4	7.2041	479.55	10.9903	806.8	18.4902	2987.65
K08/3/A	K8	K8/3	A	river pocket water	river current in front of the dam	river	2008	6	4	05.24. Hygrotus novemlineatus	sa	-	1	1	5	3.8	6.9	7.6	173	0.4	10.7	0.6	0.4	17.2	103	3.7	0.0042	86.9231	4.80655	2.30951	1.84564	33.4485	7.24437	39.3703	7.78721	3.18792	12.5818	87.4182	1.24667	2.09333	21163.4	34.9414	4363.4	7.2041	479.55	10.9903	806.8	18.4902	2987.65
K08/3/A	K8	K8/3	A	river pocket water	river current in front of the dam	river	2008	6	4	05.25. Hyphydrus ovatus	sb	-	1	1	5	3.8	6.9	7.6	173	0.4	10.7	0.6	0.4	17.2	103	3.7	0.0042	86.9231	4.80655	2.30951	1.84564	33.4485	7.24437	39.3703	7.78721	3.18792	12.5818	87.4182	1.24667	2.09333	21163.4	34.9414	4363.4	7.2041	479.55	10.9903	806.8	18.4902	2987.65
K08/3/A	K8	K8/3	A	river pocket water	river current in front of the dam	river	2008	6	4	10.01. Anacaena limbata	sb	-	2	2	5	3.8	6.9	7.6	173	0.4	10.7	0.6	0.4	17.2	103	3.7	0.0042	86.9231	4.80655	2.30951	1.84564	33.4485	7.24437	39.3703	7.78721	3.18792	12.5818	87.4182	1.24667	2.09333	21163.4	34.9414	4363.4	7.2041	479.55	10.9903	806.8	18.4902	2987.65
K08/3/A	K8	K8/3	A	river pocket water	river pocket water	river	2008	7	9	05.02. Ilybius fuliginosus	re	-	2	2	5	8.3	8.1	17.1	203	1.3	3.6	0.2	0.03	2.2	209	5	0.0038	70.6349	3.23647	0.531062	0.971944	31.2124	7.60521	41.1824	7.39479	7.86573	12.5818	87.4182	1.24667	1.9903	21163.4	34.9414	4363.4	7.2041	479.55	10.9903	806.8	18.4902	2987.65
K08/3/A	K8	K8/3	A	river pocket water	river pocket water	river	2008	7	9	05.16. Hydroporus incognitus	sa	-	3	3	5	8.3	8.1	17.1	203	1.3	3.6	0.2	0.03	2.2	209	5	0.0038	70.6349	3.23647	0.531062	0.971944	31.2124	7.60521	41.1824	7.39479	7.86573	12.5818	87.4182	1.24667	1.9903	21163.4	34.9414	4363.4	7.2041	479.55	10.9903	806.8	18.4902	2987.65
K08/3/A	K8	K8/3	A	river pocket water	river pocket water	river	2008	7	9	05.24. Hygrotus inaequalis	sb	-	1	1	5	8.3	8.1	17.1	203	1.3	3.6	0.2	0.03	2.2	209	5	0.0038	70.6349	3.23647	0.531062	0.971944	31.2124	7.60521	41.1824	7.39479	7.86573	12.5818	87.4182	1.24667	1.9903	21163.4	34.9414	4363.4	7.2041	479.55	10.9903	806.8	18.4902	2987.65
K08/3/A	K8	K8/3	A	river pocket water	river pocket water	river	2008	7	9	05.25. Hyphydrus ovatus	sb	-	1	1	5	8.3	8.1	17.1	203	1.3	3.6	0.2	0.03	2.2	209	5	0.0038	70.6349	3.23647	0.531062	0.971944	31.2124	7.60521	41.1824	7.39479	7.86573	12.5818	87.4182	1.24667	1.9903	21163.4	34.9414	4363.4	7.2041	479.55	10.9903	806.8	18.4902	2987.65
K08/3/A	K8	K8/3	A	river pocket water	river current in front of the dam	river	2008	8	6	02.02. Haliplus fluviatilis	re	-	1	1	5	7.6	5.85	16.5	255	1.2	2.4	0.4	0.14	4.8	166	4.6	0.0032	79.2135	7.18207	2.07002	1.63802	9.6391	2.40302	61.4616	11.1421	4.46404	8.32714	91.6729	1.24667	1.7903	21163.4	34.9414	4363.4	7.2041	479.55	10.9903	806.8	18.4902	2987.65
K08/3/A	K8	K8/3	A	river pocket water	river current in front of the dam	river	2008	8	6	02.02. Haliplus fluviatilis	re	-	1	1	5	7.6	5.85	16.5	255	1.2	2.4	0.4	0.14	4.8	166	4.6	0.0032	79.2135	7.18207	2.07002	1.63802	9.6391	2.40302	61.4616	11.1421	4.46404	8.32714	91.6729	1.24667	1.7903	21163.4	34.9414	4363.4	7.2041	479.55	10.9903	806.8	18.4902	2987.65
K08/3/A	K8	K8/3	A	river pocket water	river current in front of the dam	river	2008	8	6	05.07. Acilius canaliculatus	sa	-	1	1	5	7.6	5.85	16.5	255	1.2	2.4	0.4	0.14	4.8	166	4.6	0.0032	79.2135	7.18207	2.07002	1.63802	9.6391	2.40302	61.4616	11.1421	4.46404	8.32714	91.6729	1.24667	1.7903	21163.4	34.9414	4363.4	7.2041	479.55	10.9903	806.8	18.4902	2987.65
K08/3/A	K8	K8/3	A	river pocket water	river current in front of the dam	river	2008	8	6	05.16. Hydroporus incognitus	sa	-	1	1	5	7.6	5.85	16.5	255	1.2	2.4	0.4	0.14	4.8	166	4.6	0.0032	79.2135	7.18207	2.07002	1.63802	9.6391	2.40302	61.4616	11.1421	4.46404	8.32714	91.6729	1.24667	1.7903	21163.4	34.9414	4363.4	7.2041	479.55	10.9903	806.8	18.4902	2987.65
K08/3/A	K8	K8/3	A	river pocket water	river current in front of the dam	river	2008	8	6	05.25. Hyphydrus ovatus	sb	-	1	1	5	7.6	5.85	16.5	255	1.2	2.4	0.4	0.14	4.8	166	4.6	0.0032	79.2135	7.18207	2.07002	1.63802	9.6391	2.40302	61.4616	11.1421	4.46404	8.32714	91.6729	1.24667	1.7903	21163.4	34.9414	4363.4	7.2041	479.55	10.9903	806.8	18.4902	2987.65
K08/3/A	K8	K8/3	A	river pocket water	river current in front of the dam	river	2008	9	11	02.02. Haliplus fluviatilis	re	-	3	3	5	8.6	7.01	14.9	214	0.2	2	0.3	0.02	0	95	4.9	0.0027	29.5633	7.18207	2.07002	1.63802	9.6391	2.40302	61.4616	11.1421	4.46404	9.32794	90.6721	1.24667	1.7903	21163.4	34.9414	4363.4	7.2041	479.55	10.9903	806.8	18.4902	2987.65
K08/3/A	K8	K8/3	A	river pocket water	river current in front of the dam	river	2008	9	11	02.03. Peltodytes caesus	sb	-	1	1	5	8.6	7.01	14.9	214	0.2	2	0.3	0.02	0	95	4.9	0.0027	29.5633	7.18207	2.07002	1.63802	9.6391	2.40302	61.4616	11.1421	4.46404	9.32794	90.6721	1.24667	1.7903	21163.4	34.9414	4363.4	7.2041	479.55	10.9903	806.8	18.4902	2987.65
K08/3/A	K8	K8/3	A	river pocket water	river current in front of the dam	river	2008	9	11	10.01. Anacaena limbata	sb	-	1	1	5	8.6	7.01	14.9	214	0.2	2	0.3	0.02	0	95	4.9	0.0027	29.5633	7.18207	2.07002	1.63802	9.6391	2.40302	61.4616	11.1421	4.46404	9.32794	90.6721	1.24667	1.7903	21163.4	34.9414	4363.4	7.2041	479.55	10.9903	806.8	18.4902	2987.65
K08/3/A	K8	K8/3	A	river pocket water	river current in front of the dam	river	2008	9	11	11.01. Hydraena palustris	sa	-	2	2	5	8.6	7.01	14.9	214	0.2	2	0.3	0.02	0	95	4.9	0.0027	29.5633	7.18207	2.07002	1.63802	9.6391	2.40302	61.4616	11.1421	4.46404	9.32794	90.6721	1.24667	1.7903	21163.4	34.9414	4363.4	7.2041	479.55	10.9903	806.8	18.4902	2987.65
K08/3/A	K8	K8/3	A	river pocket water	river current in front of the dam	river	2008	10	14	02.02. Haliplus fluviatilis	re	-	1	1	5	8.6	7.01	14.9	214	0.2	2	0.3	0.02	0	95	4.9	0.0027	100	7.18207	2.07002	1.63802	9.6391	2.40302	61.4616	11.1421	4.46404	9.32794	90.6721	1.24667	1.7903	21163.4	34.9414	4363.4	7.2041	479.55	10.9903	806.8	18.4902	2987.65
K08/3/A	K8	K8/3	A	river pocket water	river current in front of the dam	river	2008	10	14	03.01. Noterus crassicornis	sb	-	1	1	5	8.6	7.01	14.9	214	0.2	2	0.3	0.02	0	95	4.9	0.0027	100	7.18207	2.07002	1.63802	9.6391	2.40302	61.4616	11.1421	4.46404	9.32794	90.6721	1.24667	1.7903	21163.4	34.9414	4363.4	7.2041	479.55	10.9903	806.8	18.4902	2987.65
K08/3/A	K8	K8/3	A	river pocket water	river current in front of the dam	river	2008	10	14	05.07. Acilius canaliculatus	sa	-	2	2	5	8.6	7.01	14.9	214	0.2	2	0.3	0.02	0	95	4.9	0.0027	100	7.18207	2.07002	1.63802	9.6391	2.40302	61.4616	11.1421	4.46404	9.32794	90.6721	1.24667	1.7903	21163.4	34.9414	4363.4	7.2041	479.55	10.9903	806.8	18.4902	2987.65
K08/3/A	K8	K8/3	A	river pocket water	river current in front of the dam	river	2008	10	14	05.24. Hygrotus inaequalis	sb	-	1	1	5	8.6	7.01	14.9	214	0.2	2	0.3	0.02	0	95	4.9	0.0027	100	7.18207	2.07002	1.63802	9.6391	2.40302	61.4616	11.1421	4.46404	9.32794	90.6721	1.24667	1.7903	21163.4	34.9414	4363.4	7.2041	479.55	10.9903	806.8	18.4902	2987.65
K08/3/A	K8	K8/3	A	river pocket water	river current in front of the dam	river	2008	10	14	05.25. Hyphydrus ovatus	sb	-	3	3	5	8.6	7.01	14.9	214	0.2	2	0.3	0.02	0	95	4.9	0.0027	100	7.18207	2.07002	1.63802	9.6391	2.40302	61.4616	11.1421	4.46404	9.32794	90.6721	1.24667	1.7903	21163.4	34.9414	4363.4	7.2041	479.55	10.9903	806.8	18.4902	2987.65
K08/3/A	K8	K8/3	A	river pocket water	river current in front of the dam	river	2008	5	10	03.01. Noterus crassicornis	sb	-	3	3	4	7.4	8.7	15.2	159	1	0.4	0.3	0.1	6.4	233	4.1	0.0104	100	4.80655	2.30951	1.84564	33.4485	7.24437	39.3703	7.78721	3.18792	12.5818	87.4182	1.24667	2.09333	21163.4	34.9414	4363.4	7.2041	479.55	10.9903	806.8	18.4902	2987.65
K08/3/A	K8	K8/3	A	river pocket water	river current in front of the dam	river	2008	5	10	05.05. Rhantus incognitus	re	-	1	1	4	7.4	8.7	15.2	159	1	0.4	0.3	0.1	6.4	233	4.1	0.0104	100	4.80655	2.30951	1.84564	33.4485	7.24437	39.3703	7.78721	3.18792	12.5818	87.4182	1.24667	2.09333	21163.4	34.9414	4363.4	7.2041	479.55	10.9903	806.8	18.4902	2987.65
K08/3/A	K8	K8/3	A	river pocket water	river current in front of the dam	river	2008	5	10	05.16. Hydroporus incognitus	sa	-	1	1	4	7.4	8.7	15.2	159	1	0.4	0.3	0.1	6.4	233	4.1	0.0104	100	4.80655	2.30951	1.84564	33.4485	7.24437	39.3703	7.78721	3.18792	12.5818	87.4182	1.24667	2.09333	21163.4	34.9414	4363.4	7.2041	479.55	10.9903	806.8	18.4902	2987.65
K08/3/A	K8	K8/3	A	river pocket water	river current in front of the dam	river	2008	5	10	05.24. Hygrotus decoratus	sa	-	1	1	4	7.4	8.7	15.2	159	1	0.4	0.3	0.1	6.4	233	4.1	0.0104	100	4.80655	2.30951	1.84564	33.4485	7.24437	39.3703	7.78721	3.18792	12.5818	87.4182	1.24667	2.09333	21163.4	34.9414	4363.4	7.2041	479.55	10.9903	806.8	18.4902	2987.65
K08/3/A	K8	K8/3	A	river pocket water	river current in front of the dam	river	2008	5	10	06.01. Helophorus minutus	sa	-	1	1	4	7.4	8.7	15.2	159	1	0.4	0.3	0.1	6.4	233	4.1	0.0104	100	4.80655	2.30951	1.84564	33.4485	7.24437	39.3703	7.78721	3.18792	12.5818	87.4182	1.24667	2.09333	21163.4	34.9414	4363.4	7.2041	479.55	10.9903	806.8	18.4902	2987.65
K08/3/A	K8	K8/3	A	river pocket water	river current in front of the dam	river	2008	5	10	11.01. Hydraena palustris	sa	-	1	1	4	7.4	8.7	15.2	159	1	0.4	0.3	0.1	6.4	233	4.1	0.0104	100	4.80655	2.30951	1.84564	33.4485	7.24437	39.3703	7.78721	3.18792	12.5818	87.4182	1.24667	2.09333	21163.4	34.9414	4363.4	7.2041	479.55	10.9903	806.8	18.4902	2987.65
K08/3/B	K8	K8/3	B	river pocket water	river current in front of the dam	river	2008	4	17	05.01. Agabus paludosus	re	-	1	1	3	9.3	7.6	6.4	287	0.7	0.4	0.1	0.2	69.5	180	3.9	0.0047	100	4.99562	1.4461	1.92813	32.603	7.4277	41.2686	7.16477	3.16608	12.5818	87.4182	1.24667	2.09333	21163.4	34.9414	4363.4	7.2041	479.55	10.9903	806.8	18.4902	2987.65
K08/3/B	K8	K8/3	B	river pocket water	river current in front of the dam	river	2008	4	17	05.01. Agabus sp.	sb	2	-	2	3	9.3	7.6	6.4	287	0.7	0.4	0.1	0.2	69.5	180	3.9	0.0047	100	4.99562	1.4461	1.92813	32.603	7.4277	41.2686	7.16477	3.16608	12.5818	87.4182	1.24667	2.09333	21163.4	34.9414	4363.4	7.2041	479.55	10.9903	806.8	18.4902	2987.65
K08/3/B	K8	K8/3	B	river pocket water	river current in front of the dam	river	2008	4	17	05.11. Hydaticus continentalis	sb	-	1	1	3	9.3	7.6	6.4	287	0.7	0.4	0.1	0.2	69.5	180	3.9	0.0047	100	4.99562	1.4461	1.92813	32.603	7.4277	41.2686	7.16477	3.16608	12.5818	87.4182	1.24667	2.09333	21163.4	34.9414	4363.4	7.2041	479.55	10.9903	806.8	18.4902	2987.65
K08/3/B	K8	K8/3	B	river pocket water	river current in front of the dam	river	2008	6	4	02.02. Haliplus fluviatilis	re	-	1	1	5	3.8	6.9	7.6	173	0.4	10.7	0.6	0.4	17.2	103	3.7	0.0042	86.9231	4.80655	2.30951	1.84564	33.4485	7.24437	39.3703	7.78721	3.18792	12.5818	87.4182	1.24667	2.09333	21163.4	34.9414	4363.4	7.2041	479.55	10.9903	806.8	18.4902	2987.65
K08/3/B	K8	K8/3	B	river pocket water	river current in front of the dam	river	2008	6	4	03.01. Noterus crassicornis	sb	-	5	5	5	3.8	6.9	7.6	173	0.4	10.7	0.6	0.4	17.2	103	3.7	0.0042	86.9231	4.80655	2.30951	1.84564	33.4485	7.24437	39.3703	7.78721	3.18792	12.5818	87.4182	1.24667	2.09333	21163.4	34.9414	4363.4	7.2041	479.55	10.9903	806.8	18.4902	2987.65
K08/3/B	K8	K8/3	B	river pocket water	river current in front of the dam	river	2008	6	4	05.02. Ilybius fuliginosus	re	-	3	3	5	3.8	6.9	7.6	173	0.4	10.7	0.6	0.4	17.2	103	3.7	0.0042	86.9231	4.80655	2.30951	1.84564	33.4485	7.24437	39.3703	7.78721	3.18792	12.5818	87.4182	1.24667	2.09333	21163.4	34.9414	4363.4	7.2041	479.55	10.9903	806.8	18.4902	2987.65
K08/3/B	K8	K8/3	B	river pocket water	river current in front of the dam	river	2008	6	4	05.02. Ilybius quadriguttatus	sa	-	1	1	5	3.8	6.9	7.6	173	0.4	10.7	0.6	0.4	17.2	103	3.7	0.0042	86.9231	4.80655	2.30951	1.84564	33.4485	7.24437	39.3703	7.78721	3.18792	12.5818	87.4182	1.24667	2.09333	21163.4	34.9414	4363.4	7.2041	479.55	10.9903	806.8	18.4902	2987.65
K08/3/B	K8	K8/3	B	river pocket water	river current in front of the dam	river	2008	6	4	05.03. Platambus maculatus	re	-	1	1	5	3.8	6.9	7.6	173	0.4	10.7	0.6	0.4	17.2	103	3.7	0.0042	86.9231	4.80655	2.30951	1.84564	33.4485	7.24437	39.3703	7.78721	3.18792	12.5818	87.4182	1.24667	2.09333	21163.4	34.9414	4363.4	7.2041	479.55	10.9903	806.8	18.4902	2987.65
K08/3/B	K8	K8/3	B	river pocket water	river current in front of the dam	river	2008	6	4	05.25. Hyphydrus ovatus	sb	-	5	5	5	3.8	6.9	7.6	173	0.4	10.7	0.6	0.4	17.2	103	3.7	0.0042	86.9231	4.80655	2.30951	1.84564	33.4485	7.24437	39.3703	7.78721	3.18792	12.5818	87.4182	1.24667	2.09333	21163.4	34.9414	4363.4	7.2041	479.55	10.9903	806.8	18.4902	2987.65
K08/3/B	K8	K8/3	B	river pocket water	river current in front of the dam	river	2008	6	4	10.01. Anacaena limbata	sb	-	4	4	5	3.8	6.9	7.6	173	0.4	10.7	0.6	0.4	17.2	103	3.7	0.0042	86.9231	4.80655	2.30951	1.84564	33.4485	7.24437	39.3703	7.78721	3.18792	12.5818	87.4182	1.24667	2.09333	21163.4	34.9414	4363.4	7.2041	479.55	10.9903	806.8	18.4902	2987.65
K08/3/B	K8	K8/3	B	river pocket water	river current in front of the dam	river	2008	6	4	10.09. Hydrobius fuscipes	sb	-	2	2	5	3.8	6.9	7.6	173	0.4	10.7	0.6	0.4	17.2	103	3.7	0.0042	86.9231	4.80655	2.30951	1.84564	33.4485	7.24437	39.3703	7.78721	3.18792	12.5818	87.4182	1.24667	2.09333	21163.4	34.9414	4363.4	7.2041	479.55	10.9903	806.8	18.4902	2987.65
K08/3/B	K8	K8/3	B	river pocket water	river current in front of the dam	river	2008	6	4	11.01. Hydraena palustris	sa	-	3	3	5	3.8	6.9	7.6	173	0.4	10.7	0.6	0.4	17.2	103	3.7	0.0042	86.9231	4.80655	2.30951	1.84564	33.4485	7.24437	39.3703	7.78721	3.18792	12.5818	87.4182	1.24667	2.09333	21163.4	34.9414	4363.4	7.2041	479.55	10.9903	806.8	18.4902	2987.65
K08/3/B	K8	K8/3	B	river pocket water	river current in front of the dam	river	2008	6	4	14.06. Scirtes sp.	sb	2	-	2	5	3.8	6.9	7.6	173	0.4	10.7	0.6	0.4	17.2	103	3.7	0.0042	86.9231	4.80655	2.30951	1.84564	33.4485	7.24437	39.3703	7.78721	3.18792	12.5818	87.4182	1.24667	2.09333	21163.4	34.9414	4363.4	7.2041	479.55	10.9903	806.8	18.4902	2987.65
K08/3/B	K8	K8/3	B	river pocket water	river current in front of the dam	river	2008	6	5	03.01. Noterus clavicornis	sb	-	1	1	5	3.8	6.9	7.6	173	0.4	10.7	0.6	0.4	17.2	103	3.7	0.0042	86.9231	4.80655	2.30951	1.84564	33.4485	7.24437	39.3703	7.78721	3.18792	12.5818	87.4182	1.24667	2.09333	21163.4	34.9414	4363.4	7.2041	479.55	10.9903	806.8	18.4902	2987.65
K08/3/B	K8	K8/3	B	river pocket water	river current in front of the dam	river	2008	6	5	03.01. Noterus clavicornis	sb	-	1	1	5	3.8	6.9	7.6	173	0.4	10.7	0.6	0.4	17.2	103	3.7	0.0042	86.9231	4.80655	2.30951	1.84564	33.4485	7.24437	39.3703	7.78721	3.18792	12.5818	87.4182	1.24667	2.09333	21163.4	34.9414	4363.4	7.2041	479.55	10.9903	806.8	18.4902	2987.65
K08/3/B	K8	K8/3	B	river pocket water	river current in front of the dam	river	2008	6	5	05.10. Dytiscus marginalis	sb	2	-	2	5	3.8	6.9	7.6	173	0.4	10.7	0.6	0.4	17.2	103	3.7	0.0042	86.9231	4.80655	2.30951	1.84564	33.4485	7.24437	39.3703	7.78721	3.18792	12.5818	87.4182	1.24667	2.09333	21163.4	34.9414	4363.4	7.2041	479.55	10.9903	806.8	18.4902	2987.65
K08/3/B	K8	K8/3	B	river pocket water	river current in front of the dam	river	2008	6	5	05.16. Hydroporus palustris	sb	-	1	1	5	3.8	6.9	7.6	173	0.4	10.7	0.6	0.4	17.2	103	3.7	0.0042	86.9231	4.80655	2.30951	1.84564	33.4485	7.24437	39.3703	7.78721	3.18792	12.5818	87.4182	1.24667	2.09333	21163.4	34.9414	4363.4	7.2041	479.55	10.9903	806.8	18.4902	2987.65
K08/3/B	K8	K8/3	B	river pocket water	river current in front of the dam	river	2008	6	5	10.09. Hydrobius fuscipes	sb	-	2	2	5	3.8	6.9	7.6	173	0.4	10.7	0.6	0.4	17.2	103	3.7	0.0042	86.9231	4.80655	2.30951	1.84564	33.4485	7.24437	39.3703	7.78721	3.18792	12.5818	87.4182	1.24667	2.09333	21163.4	34.9414	4363.4	7.2041	479.55	10.9903	806.8	18.4902	2987.65
K08/3/B	K8	K8/3	B	river pocket water	river current in front of the dam	river	2008	7	9	05.05. Rhantus latitans	sb	-	1	1	5	8.3	8.1	17.1	203	1.3	3.6	0.2	0.03	2.2	209	5	0.0038	70.6349	3.23647	0.531062	0.971944	31.2124	7.60521	41.1824	7.39479	7.86573	12.5818	87.4182	1.24667	1.9903	21163.4	34.9414	4363.4	7.2041	479.55	10.9903	806.8	18.4902	2987.65
K08/3/B	K8	K8/3	B	river pocket water	river current in front of the dam	river	2008	7	9	05.05. Rhantus suturalis	sb	-	1	1	5	8.3	8.1	17.1	203	1.3	3.6	0.2	0.03	2.2	209	5	0.0038	70.6349	3.23647	0.531062	0.971944	31.2124	7.60521	41.1824	7.39479	7.86573	12.5818	87.4182	1.24667	1.9903	21163.4	34.9414	4363.4	7.2041	479.55	10.9903	806.8	18.4902	2987.65
K08/3/B	K8	K8/3	B	river pocket water	river current in front of the dam	river	2008	7	9	05.07. Acilius canaliculatus	sa	-	2	2	5	8.3	8.1	17.1	203	1.3	3.6	0.2	0.03	2.2	209	5	0.0038	70.6349	3.23647	0.531062	0.971944	31.2124	7.60521	41.1824	7.39479	7.86573	12.5818	87.4182	1.24667	1.9903	21163.4	34.9414	4363.4	7.2041	479.55	10.9903	806.8	18.4902	2987.65
K08/3/B	K8	K8/3	B	river pocket water	river current in front of the dam	river	2008	7	9	05.10. Dytiscus circumflexus	sb	-	1	1	5	8.3	8.1	17.1	203	1.3	3.6	0.2	0.03	2.2	209	5	0.0038	70.6349	3.23647	0.531062	0.971944	31.2124	7.60521	41.1824	7.39479	7.86573	12.5818	87.4182	1.24667	1.9903	21163.4	34.9414	4363.4	7.2041	479.55	10.9903	806.8	18.4902	2987.65
K08/3/B	K8	K8/3	B	river pocket water	river current in front of the dam	river	2008	7	9	05.11. Hydaticus seminiger	sb	-	1	1	5	8.3	8.1	17.1	203	1.3	3.6	0.2	0.03	2.2	209	5	0.0038	70.6349	3.23647	0.531062	0.971944	31.2124	7.60521	41.1824	7.39479	7.86573	12.5818	87.4182	1.24667	1.9903	21163.4	34.9414	4363.4	7.2041	479.55	10.9903	806.8	18.4902	2987.65
K08/3/B	K8	K8/3	B	river pocket water	river current in front of the dam	river	2008	7	9	05.16. Hydroporus incognitus	sa	-	2	2	5	8.3	8.1	17.1	203	1.3	3.6	0.2	0.03	2.2	209	5	0.0038	70.6349	3.23647	0.531062	0.971944	31.2124	7.60521	41.1824	7.39479	7.86573	12.5818	87.4182	1.24667	1.9903	21163.4	34.9414	4363.4	7.2041	479.55	10.9903	806.8	18.4902	2987.65
K08/3/B	K8	K8/3	B	river pocket water	river current in front of the dam	river	2008	7	9	05.16. Hydroporus palustris	sb	-	1	1	5	8.3	8.1	17.1	203	1.3	3.6	0.2	0.03	2.2	209	5	0.0038	70.6349	3.23647	0.531062	0.971944	31.2124	7.60521	41.1824	7.39479	7.86573	12.5818	87.4182	1.24667	1.9903	21163.4	34.9414	4363.4	7.2041	479.55	10.9903	806.8	18.4902	2987.65
K08/3/B	K8	K8/3	B	river pocket water	river current in front of the dam	river	2008	7	9	05.25. Hyphydrus ovatus	sb	-	3	3	5	8.3	8.1	17.1	203	1.3	3.6	0.2	0.03	2.2	209	5	0.0038	70.6349	3.23647	0.531062	0.971944	31.2124	7.60521	41.1824	7.39479	7.86573	12.5818	87.4182	1.24667	1.9903	21163.4	34.9414	4363.4	7.2041	479.55	10.9903	806.8	18.4902	2987.65
K08/3/B	K8	K8/3	B	river pocket water	river current in front of the dam	river	2008	8	6	11.01. Hydraena palustris	sa	-	3	3	5	7.6	5.85	16.5	255	1.2	2.4	0.4	0.14	4.8	166	4.6	0.0032	79.2135	7.18207	2.07002	1.63802	9.6391	2.40302	61.4616	11.1421	4.46404	8.32714	91.6729	1.24667	1.7903	21163.4	34.9414	4363.4	7.2041	479.55	10.9903	806.8	18.4902	2987.65
K08/3/B	K8	K8/3	B	river pocket water	river current in front of the dam	river	2008	9	11	03.01. Noterus crassicornis	sb	-	1	1	5	8.6	7.01	14.9	214	0.2	2	0.3	0.02	0	95	4.9	0.0027	29.5633	7.18207	2.07002	1.63802	9.6391	2.40302	61.4616	11.1421	4.46404	9.32794	90.6721	1.24667	1.7903	21163.4	34.9414	4363.4	7.2041	479.55	10.9903	806.8	18.4902	2987.65
K08/3/B	K8	K8/3	B	river pocket water	river current in front of the dam	river	2008	9	11	05.16. Hydroporus palustris	sb	-	3	3	5	8.6	7.01	14.9	214	0.2	2	0.3	0.02	0	95	4.9	0.0027	29.5633	7.18207	2.07002	1.63802	9.6391	2.40302	61.4616	11.1421	4.46404	9.32794	90.6721	1.24667	1.7903	21163.4	34.9414	4363.4	7.2041	479.55	10.9903	806.8	18.4902	2987.65
K08/3/B	K8	K8/3	B	river pocket water	river current in front of the dam	river	2008	10	14	02.02. Haliplus flavicollis	re	-	1	1	5	8.6	7.01	14.9	214	0.2	2	0.3	0.02	0	95	4.9	0.0027	100	7.18207	2.07002	1.63802	9.6391	2.40302	61.4616	11.1421	4.46404	9.32794	90.6721	1.24667	1.7903	21163.4	34.9414	4363.4	7.2041	479.55	10.9903	806.8	18.4902	2987.65
K08/3/B	K8	K8/3	B	river pocket water	river current in front of the dam	river	2008	10	14	05.17. Nebrioporus canaliculatus	sa	-	1	1	5	8.6	7.01	14.9	214	0.2	2	0.3	0.02	0	95	4.9	0.0027	100	7.18207	2.07002	1.63802	9.6391	2.40302	61.4616	11.1421	4.46404	9.32794	90.6721	1.24667	1.7903	21163.4	34.9414	4363.4	7.2041	479.55	10.9903	806.8	18.4902	2987.65
K08/3/C	K8	K8/3	C	river pocket water	river current in front of the dam	river	2008	6	4	01.02. Gyrinus sp.	sb	1	-	1	5	3.8	6.9	7.6	173	0.4	10.7	0.6	0.4	17.2	103	3.7	0.0042	86.9231	4.80655	2.30951	1.84564	33.4485	7.24437	39.3703	7.78721	3.18792	12.5818	87.4182	1.24667	2.09333	21163.4	34.9414	4363.4	7.2041	479.55	10.9903	806.8	18.4902	2987.65
K08/3/C	K8	K8/3	C	river pocket water	river current in front of the dam	river	2008	6	4	03.01. Noterus crassicornis	sb	-	2	2	5	3.8	6.9	7.6	173	0.4	10.7	0.6	0.4	17.2	103	3.7	0.0042	86.9231	4.80655	2.30951	1.84564	33.4485	7.24437	39.3703	7.78721	3.18792	12.5818	87.4182	1.24667	2.09333	21163.4	34.9414	4363.4	7.2041	479.55	10.9903	806.8	18.4902	2987.65
K08/3/C	K8	K8/3	C	river pocket water	river current in front of the dam	river	2008	6	4	05.10. Dytiscus marginalis	sb	1	-	1	5	3.8	6.9	7.6	173	0.4	10.7	0.6	0.4	17.2	103	3.7	0.0042	86.9231	4.80655	2.30951	1.84564	33.4485	7.24437	39.3703	7.78721	3.18792	12.5818	87.4182	1.24667	2.09333	21163.4	34.9414	4363.4	7.2041	479.55	10.9903	806.8	18.4902	2987.65
K08/3/C	K8	K8/3	C	river pocket water	river current in front of the dam	river	2008	6	4	05.16. Hydroporus incognitus	sa	-	1	1	5	3.8	6.9	7.6	173	0.4	10.7	0.6	0.4	17.2	103	3.7	0.0042	86.9231	4.80655	2.30951	1.84564	33.4485	7.24437	39.3703	7.78721	3.18792	12.5818	87.4182	1.24667	2.09333	21163.4	34.9414	4363.4	7.2041	479.55	10.9903	806.8	18.4902	2987.65
K08/3/C	K8	K8/3	C	river pocket water	river current in front of the dam	river	2008	6	4	05.24. Hygrotus inaequalis	sb	-	1	1	5	3.8	6.9	7.6	173	0.4	10.7	0.6	0.4	17.2	103	3.7	0.0042	86.9231	4.80655	2.30951	1.84564	33.4485	7.24437	39.3703	7.78721	3.18792	12.5818	87.4182	1.24667	2.09333	21163.4	34.9414	4363.4	7.2041	479.55	10.9903	806.8	18.4902	2987.65
K08/3/C	K8	K8/3	C	river pocket water	river current in front of the dam	river	2008	8	6	02.02. Haliplus fluviatilis	re	-	2	2	5	7.6	5.85	16.5	255	1.2	2.4	0.4	0.14	4.8	166	4.6	0.0032	79.2135	7.18207	2.07002	1.63802	9.6391	2.40302	61.4616	11.1421	4.46404	8.32714	91.6729	1.24667	1.7903	21163.4	34.9414	4363.4	7.2041	479.55	10.9903	806.8	18.4902	2987.65
K08/3/C	K8	K8/3	C	river pocket water	river current in front of the dam	river	2008	8	6	05.05. Rhantus latitans	sb	-	1	1	5	7.6	5.85	16.5	255	1.2	2.4	0.4	0.14	4.8	166	4.6	0.0032	79.2135	7.18207	2.07002	1.63802	9.6391	2.40302	61.4616	11.1421	4.46404	8.32714	91.6729	1.24667	1.7903	21163.4	34.9414	4363.4	7.2041	479.55	10.9903	806.8	18.4902	2987.65
K08/3/C	K8	K8/3	C	river pocket water	river current in front of the dam	river	2008	9	11	02.02. Haliplus fluviatilis	re	-	3	3	5	8.6	7.01	14.9	214	0.2	2	0.3	0.02	0	95	4.9	0.0027	29.5633	7.18207	2.07002	1.63802	9.6391	2.40302	61.4616	11.1421	4.46404	9.32794	90.6721	1.24667	1.7903	21163.4	34.9414	4363.4	7.2041	479.55	10.9903	806.8	18.4902	2987.65
K08/3/C	K8	K8/3	C	river pocket water	river current in front of the dam	river	2008	9	11	02.03. Peltodytes caesus	sb	-	1	1	5	8.6	7.01	14.9	214	0.2	2	0.3	0.02	0	95	4.9	0.0027	29.5633	7.18207	2.07002	1.63802	9.6391	2.40302	61.4616	11.1421	4.46404	9.32794	90.6721	1.24667	1.7903	21163.4	34.9414	4363.4	7.2041	479.55	10.9903	806.8	18.4902	2987.65
K08/3/C	K8	K8/3	C	river pocket water	river current in front of the dam	river	2008	9	11	08.01. Hydrochus ignicollis	sa	-	1	1	5	8.6	7.01	14.9	214	0.2	2	0.3	0.02	0	95	4.9	0.0027	29.5633	7.18207	2.07002	1.63802	9.6391	2.40302	61.4616	11.1421	4.46404	9.32794	90.6721	1.24667	1.7903	21163.4	34.9414	4363.4	7.2041	479.55	10.9903	806.8	18.4902	2987.65
K08/3/C	K8	K8/3	C	river pocket water	river current in front of the dam	river	2008	9	11	10.11. Hydrochara caraboides	sb	-	1	1	5	8.6	7.01	14.9	214	0.2	2	0.3	0.02	0	95	4.9	0.0027	29.5633	7.18207	2.07002	1.63802	9.6391	2.40302	61.4616	11.1421	4.46404	9.32794	90.6721	1.24667	1.7903	21163.4	34.9414	4363.4	7.2041	479.55	10.9903	806.8	18.4902	2987.65
K08/3/C	K8	K8/3	C	river pocket water	river current in front of the dam	river	2008	9	11	10.13. Laccobius minutus	sa	-	1	1	5	8.6	7.01	14.9	214	0.2	2	0.3	0.02	0	95	4.9	0.0027	29.5633	7.18207	2.07002	1.63802	9.6391	2.40302	61.4616	11.1421	4.46404	9.32794	90.6721	1.24667	1.7903	21163.4	34.9414	4363.4	7.2041	479.55	10.9903	806.8	18.4902	2987.65
K08/3/C	K8	K8/3	C	river pocket water	river current in front of the dam	river	2008	9	11	11.01. Hydraena palustris	sa	-	6	6	5	8.6	7.01	14.9	214	0.2	2	0.3	0.02	0	95	4.9	0.0027	29.5633	7.18207	2.07002	1.63802	9.6391	2.40302	61.4616	11.1421	4.46404	9.32794	90.6721	1.24667	1.7903	21163.4	34.9414	4363.4	7.2041	479.55	10.9903	806.8	18.4902	2987.65
K08/3/C	K8	K8/3	C	river pocket water	river current in front of the dam	river	2008	10	14	02.02. Haliplus fluviatilis	re	-	3	3	5	8.6	7.01	14.9	214	0.2	2	0.3	0.02	0	95	4.9	0.0027	100	7.18207	2.07002	1.63802	9.6391	2.40302	61.4616	11.1421	4.46404	9.32794	90.6721	1.24667	1.7903	21163.4	34.9414	4363.4	7.2041	479.55	10.9903	806.8	18.4902	2987.65
K08/3/C	K8	K8/3	C	river pocket water	river current in front of the dam	river	2008	10	14	11.01. Hydraena palustris	sa	-	4	4	5	8.6	7.01	14.9	214	0.2	2	0.3	0.02	0	95	4.9	0.0027	100	7.18207	2.07002	1.63802	9.6391	2.40302	61.4616	11.1421	4.46404	9.32794	90.6721	1.24667	1.7903	21163.4	34.9414	4363.4	7.2041	479.55	10.9903	806.8	18.4902	2987.65
K08/6/A	K8	K8/6	A	river current	river current sand	river	2008	6	4	02.02. Haliplus fluviatilis	re	-	1	1	0	3.8	6.9	7.6	173	0.4	10.7	0.6	0.4	17.2	103	4.1	0.0573	93.8462	9.49276	5.05443	3.56502	27.1982	4.65367	45.125	3.19416	1.71671	14.1119	85.8881	1.13333	1.74803	21163.4	34.9414	4363.4	7.2041	479.55	10.9903	806.8	18.4902	2987.65
K08/6/A	K8	K8/6	A	river current	river current sand	river	2008	6	4	11.01. Hydraena palustris	sa	-	4	4	0	3.8	6.9	7.6	173	0.4	10.7	0.6	0.4	17.2	103	4.1	0.0573	93.8462	9.49276	5.05443	3.56502	27.1982	4.65367	45.125	3.19416	1.71671	14.1119	85.8881	1.13333	1.74803	21163.4	34.9414	4363.4	7.2041	479.55	10.9903	806.8	18.4902	2987.65
K08/6/A	K8	K8/6	A	river current	river current sand	river	2008	7	9	11.01. Hydraena palustris	sa	-	2	2	0	8.3	8.1	17.1	203	1.3	3.6	0.2	0.03	2.2	209	5.8	0.0178	88.8889	14.3926	7.7745	8.22701	52.9508	3.87782	11.5958	0.905034	0.276538	0.932736	99.0673	-0.666667	1.33303	21163.4	34.9414	4363.4	7.2041	479.55	10.9903	806.8	18.4902	2987.65
K08/6/A	K8	K8/6	A	river current	river current behind the river dam, sand	river	2008	10	14	05.07. Acilius canaliculatus	sa	-	2	2	0	7.7	7.58	11.1	257	0.4	3	0.3	0	8.3	219	5.2	0.0397	100	42.1225	5.56137	4.78932	24.3653	3.8079	14.7213	2.78723	1.84507	13.0126	86.9874	0.0266667	0.93803	21163.4	34.9414	4363.4	7.2041	479.55	10.9903	806.8	18.4902	2987.65
K08/6/B	K8	K8/6	B	river current	river current behind the river dam, sand	river	2008	8	6	12.05. Oulimnius tuberculatus	rb	-	3	3	0	7.6	5.85	16.5	255	1.2	2.4	0.4	0.14	4.8	166	3.7	0.0974	71.9101	8.66863	6.58479	4.76519	44.1298	15.1213	19.5562	0.762671	0.411362	0.723888	99.2761	0.993333	1.74803	21163.4	34.9414	4363.4	7.2041	479.55	10.9903	806.8	18.4902	2987.65
K08/6/B	K8	K8/6	B	river current	river current sand	river	2008	9	11	05.01. Agabus sp.	sb	1	-	1	0	8.6	7.01	14.9	214	0.2	2	0.3	0.02	0	95	5.2	0.0535	29.5633	8.66863	6.58479	4.76519	44.1298	15.1213	19.5562	0.762671	0.411362	13.0126	86.9874	0.466667	1.35303	21163.4	34.9414	4363.4	7.2041	479.55	10.9903	806.8	18.4902	2987.65
K08/6/B	K8	K8/6	B	river current	river current, sand, behind the river dam	river	2008	10	14	02.02. Haliplus fluviatilis	re	-	1	1	0	7.7	7.58	11.1	257	0.4	3	0.3	0	8.3	219	5.2	0.0397	100	42.1225	5.56137	4.78932	24.3653	3.8079	14.7213	2.78723	1.84507	13.0126	86.9874	0.0266667	0.93803	21163.4	34.9414	4363.4	7.2041	479.55	10.9903	806.8	18.4902	2987.65
K08/6/B	K8	K8/6	B	river current	river current, sand, behind the river dam	river	2008	10	14	05.05. Rhantus suturalis	sb	-	2	2	0	7.7	7.58	11.1	257	0.4	3	0.3	0	8.3	219	5.2	0.0397	100	42.1225	5.56137	4.78932	24.3653	3.8079	14.7213	2.78723	1.84507	13.0126	86.9874	0.0266667	0.93803	21163.4	34.9414	4363.4	7.2041	479.55	10.9903	806.8	18.4902	2987.65
K08/6/B	K8	K8/6	B	river current	river current, sand, behind the river dam	river	2008	10	14	05.07. Acilius canaliculatus	sa	-	1	1	0	7.7	7.58	11.1	257	0.4	3	0.3	0	8.3	219	5.2	0.0397	100	42.1225	5.56137	4.78932	24.3653	3.8079	14.7213	2.78723	1.84507	13.0126	86.9874	0.0266667	0.93803	21163.4	34.9414	4363.4	7.2041	479.55	10.9903	806.8	18.4902	2987.65
K08/6/B	K8	K8/6	B	river current	river current, sand, behind the river dam	river	2008	10	14	05.10. Dytiscus dimidiatus	sb	-	1	1	0	7.7	7.58	11.1	257	0.4	3	0.3	0	8.3	219	5.2	0.0397	100	42.1225	5.56137	4.78932	24.3653	3.8079	14.7213	2.78723	1.84507	13.0126	86.9874	0.0266667	0.93803	21163.4	34.9414	4363.4	7.2041	479.55	10.9903	806.8	18.4902	2987.65
K08/6/B	K8	K8/6	B	river current	river current, sand, behind the river dam	river	2008	10	14	05.22. Suphrodytes dorsalis	sb	-	1	1	0	7.7	7.58	11.1	257	0.4	3	0.3	0	8.3	219	5.2	0.0397	100	42.1225	5.56137	4.78932	24.3653	3.8079	14.7213	2.78723	1.84507	13.0126	86.9874	0.0266667	0.93803	21163.4	34.9414	4363.4	7.2041	479.55	10.9903	806.8	18.4902	2987.65
K08/6/B	K8	K8/6	B	river current	river current, sand, behind the river dam	river	2008	10	14	05.24. Hygrotus impressopunctatus	sb	-	1	1	0	7.7	7.58	11.1	257	0.4	3	0.3	0	8.3	219	5.2	0.0397	100	42.1225	5.56137	4.78932	24.3653	3.8079	14.7213	2.78723	1.84507	13.0126	86.9874	0.0266667	0.93803	21163.4	34.9414	4363.4	7.2041	479.55	10.9903	806.8	18.4902	2987.65
K08/6/B	K8	K8/6	B	river current	river current, sand, behind the river dam	river	2008	10	14	05.27. Laccophilus hyalinus	re	-	1	1	0	7.7	7.58	11.1	257	0.4	3	0.3	0	8.3	219	5.2	0.0397	100	42.1225	5.56137	4.78932	24.3653	3.8079	14.7213	2.78723	1.84507	13.0126	86.9874	0.0266667	0.93803	21163.4	34.9414	4363.4	7.2041	479.55	10.9903	806.8	18.4902	2987.65
K08/6/B	K8	K8/6	B	river current	river current, sand, behind the river dam	river	2008	10	14	10.01. Anacaena limbata	sb	-	1	1	0	7.7	7.58	11.1	257	0.4	3	0.3	0	8.3	219	5.2	0.0397	100	42.1225	5.56137	4.78932	24.3653	3.8079	14.7213	2.78723	1.84507	13.0126	86.9874	0.0266667	0.93803	21163.4	34.9414	4363.4	7.2041	479.55	10.9903	806.8	18.4902	2987.65
K08/6/B	K8	K8/6	B	river current	river current, sand, behind the river dam	river	2008	10	14	10.01. Anacaena lutescens	sa	-	1	1	0	7.7	7.58	11.1	257	0.4	3	0.3	0	8.3	219	5.2	0.0397	100	42.1225	5.56137	4.78932	24.3653	3.8079	14.7213	2.78723	1.84507	13.0126	86.9874	0.0266667	0.93803	21163.4	34.9414	4363.4	7.2041	479.55	10.9903	806.8	18.4902	2987.65
K08/6/B	K8	K8/6	B	river current	river current, sand, behind the river dam	river	2008	10	14	10.07. Enochrus melanocephalus	sa	-	4	4	0	7.7	7.58	11.1	257	0.4	3	0.3	0	8.3	219	5.2	0.0397	100	42.1225	5.56137	4.78932	24.3653	3.8079	14.7213	2.78723	1.84507	13.0126	86.9874	0.0266667	0.93803	21163.4	34.9414	4363.4	7.2041	479.55	10.9903	806.8	18.4902	2987.65
K08/6/B	K8	K8/6	B	river current	river current, sand, behind the river dam	river	2008	10	14	10.09. Hydrobius fuscipes	sb	-	1	1	0	7.7	7.58	11.1	257	0.4	3	0.3	0	8.3	219	5.2	0.0397	100	42.1225	5.56137	4.78932	24.3653	3.8079	14.7213	2.78723	1.84507	13.0126	86.9874	0.0266667	0.93803	21163.4	34.9414	4363.4	7.2041	479.55	10.9903	806.8	18.4902	2987.65
K08/6/B	K8	K8/6	B	river current	river current, sand, behind the river dam	river	2008	10	14	11.02. Limnebius parvulus	sb	-	1	1	0	7.7	7.58	11.1	257	0.4	3	0.3	0	8.3	219	5.2	0.0397	100	42.1225	5.56137	4.78932	24.3653	3.8079	14.7213	2.78723	1.84507	13.0126	86.9874	0.0266667	0.93803	21163.4	34.9414	4363.4	7.2041	479.55	10.9903	806.8	18.4902	2987.65
K08/6/B	K8	K8/6	B	river current	river current, sand, behind the river dam	river	2008	10	14	11.03. Ochthebius minimus	sb	-	1	1	0	7.7	7.58	11.1	257	0.4	3	0.3	0	8.3	219	5.2	0.0397	100	42.1225	5.56137	4.78932	24.3653	3.8079	14.7213	2.78723	1.84507	13.0126	86.9874	0.0266667	0.93803	21163.4	34.9414	4363.4	7.2041	479.55	10.9903	806.8	18.4902	2987.65
K08/6/C	K8	K8/6	C	river current	river current sand	river	2008	5	5	05.25. Hyphydrus ovatus	sb	-	1	1	0	9.4	8.4	14.2	159	1.2	0.4	0.2	0.1	10.4	253	4.4	0.1956	100	9.49276	5.05443	3.56502	27.1982	4.65367	45.125	3.19416	1.71671	0.386873	99.6131	1.13333	1.74803	21163.4	34.9414	4363.4	7.2041	479.55	10.9903	806.8	18.4902	2987.65
K08/6/C	K8	K8/6	C	river current	river current sand	river	2008	5	5	10.15. Cercyon convexiusculus	sb	-	2	2	0	9.4	8.4	14.2	159	1.2	0.4	0.2	0.1	10.4	253	4.4	0.1956	100	9.49276	5.05443	3.56502	27.1982	4.65367	45.125	3.19416	1.71671	0.386873	99.6131	1.13333	1.74803	21163.4	34.9414	4363.4	7.2041	479.55	10.9903	806.8	18.4902	2987.65
K08/6/C	K8	K8/6	C	river current	river current sand	river	2008	5	5	11.01. Hydraena palustris	sa	-	1	1	0	9.4	8.4	14.2	159	1.2	0.4	0.2	0.1	10.4	253	4.4	0.1956	100	9.49276	5.05443	3.56502	27.1982	4.65367	45.125	3.19416	1.71671	0.386873	99.6131	1.13333	1.74803	21163.4	34.9414	4363.4	7.2041	479.55	10.9903	806.8	18.4902	2987.65
K08/6/C	K8	K8/6	C	river current	river current sand	river	2008	9	11	02.02. Haliplus sp.	sb	1	-	1	0	8.6	7.01	14.9	214	0.2	2	0.3	0.02	0	95	5.2	0.0535	29.5633	8.66863	6.58479	4.76519	44.1298	15.1213	19.5562	0.762671	0.411362	13.0126	86.9874	0.466667	1.35303	21163.4	34.9414	4363.4	7.2041	479.55	10.9903	806.8	18.4902	2987.65
K08/6/C	K8	K8/6	C	river current	river current sand	river	2008	9	11	05.01. Agabus sp.	sb	1	-	1	0	8.6	7.01	14.9	214	0.2	2	0.3	0.02	0	95	5.2	0.0535	29.5633	8.66863	6.58479	4.76519	44.1298	15.1213	19.5562	0.762671	0.411362	13.0126	86.9874	0.466667	1.35303	21163.4	34.9414	4363.4	7.2041	479.55	10.9903	806.8	18.4902	2987.65
K08/6/C	K8	K8/6	C	river current	river current behind the river dam	river	2008	9	11	05.01. Agabus sp.	sb	1	-	1	0	8.6	7.01	14.9	214	0.2	2	0.3	0.02	0	95	5.2	0.0535	29.5633	8.66863	6.58479	4.76519	44.1298	15.1213	19.5562	0.762671	0.411362	13.0126	86.9874	0.466667	1.35303	21163.4	34.9414	4363.4	7.2041	479.55	10.9903	806.8	18.4902	2987.65
K08/6/C	K8	K8/6	C	river current	river current sand	river	2008	9	11	11.01. Hydraena palustris	sa	-	1	1	0	8.6	7.01	14.9	214	0.2	2	0.3	0.02	0	95	5.2	0.0535	29.5633	8.66863	6.58479	4.76519	44.1298	15.1213	19.5562	0.762671	0.411362	13.0126	86.9874	0.466667	1.35303	21163.4	34.9414	4363.4	7.2041	479.55	10.9903	806.8	18.4902	2987.65
K09/1/A	K9	K9/1	A	river pocket water	river current Sagittaria	river	2008	5	7	05.10. Dytiscus dimidiatus	sb	3	-	3	5	7.5	7.1	15.5	221	1.8	0.4	0.2	0.08	9.1	176	3.3	0.0058	100	7.60481	3.28242	4.48489	49.1388	3.8999	17.3546	10.0747	4.1599	33.8004	66.1996	1.10667	1.7903	39624.8	65.4217	18461.4	30.4803	5740.96	31.0971	5532.02	29.9653	6152.93
K09/1/A	K9	K9/1	A	river pocket water	river current Sagittaria	river	2008	6	4	05.16. Hydroporus incognitus	sa	-	8	8	5	2.4	7.4	19	243	0.4	2.1	0.2	0.6	5.4	193	2.5	0.0047	100	7.60481	3.28242	4.48489	49.1388	3.8999	17.3546	10.0747	4.1599	33.8004	66.1996	1.10667	1.7903	39624.8	65.4217	18461.4	30.4803	5740.96	31.0971	5532.02	29.9653	6152.93
K09/1/A	K9	K9/3	A	river pocket water	river current Sagittaria	river	2008	10	14	02.02. Haliplus fluviatilis	re	-	1	1	5	2.2	6.89	11.2	190.1	0.4	2.3	0.1	0	1.5	223	1.5	0.0031	100	72.0328	4.80514	3.76439	13.0868	1.28432	3.83082	0.819309	0.376439	28.5327	71.4673	-0.44	-0.0663636	39624.8	65.4217	18461.4	30.4803	5740.96	31.0971	5532.02	29.9653	6152.93
K09/1/A	K9	K9/3	A	river pocket water	river current Sagittaria	river	2008	10	14	05.25. Hyphydrus ovatus	sb	-	1	1	5	2.2	6.89	11.2	190.1	0.4	2.3	0.1	0	1.5	223	1.5	0.0031	100	72.0328	4.80514	3.76439	13.0868	1.28432	3.83082	0.819309	0.376439	28.5327	71.4673	-0.44	-0.0663636	39624.8	65.4217	18461.4	30.4803	5740.96	31.0971	5532.02	29.9653	6152.93
K09/1/A	K9	K9/3	A	river pocket water	river current Sagittaria	river	2008	10	14	06.01. Helophorus aquaticus	sb	-	1	1	5	2.2	6.89	11.2	190.1	0.4	2.3	0.1	0	1.5	223	1.5	0.0031	100	72.0328	4.80514	3.76439	13.0868	1.28432	3.83082	0.819309	0.376439	28.5327	71.4673	-0.44	-0.0663636	39624.8	65.4217	18461.4	30.4803	5740.96	31.0971	5532.02	29.9653	6152.93
K09/1/A	K9	K9/3	A	river pocket water	river current Sagittaria	river	2008	10	14	06.01. Helophorus granularis	sa	-	1	1	5	2.2	6.89	11.2	190.1	0.4	2.3	0.1	0	1.5	223	1.5	0.0031	100	72.0328	4.80514	3.76439	13.0868	1.28432	3.83082	0.819309	0.376439	28.5327	71.4673	-0.44	-0.0663636	39624.8	65.4217	18461.4	30.4803	5740.96	31.0971	5532.02	29.9653	6152.93
K09/1/B	K9	K9/1	B	river pocket water	river pocket, Phalaris arundinacea	river	2008	5	7	05.05. Rhantus exoletus	sb	-	1	1	5	7.5	7.1	15.5	221	1.8	0.4	0.2	0.08	9.1	176	3.3	0.0058	100	7.60481	3.28242	4.48489	49.1388	3.8999	17.3546	10.0747	4.1599	33.8004	66.1996	1.10667	1.7903	39624.8	65.4217	18461.4	30.4803	5740.96	31.0971	5532.02	29.9653	6152.93
K09/1/B	K9	K9/1	B	river pocket water	river pocket, Phalaris arundinacea	river	2008	5	7	05.10. Dytiscus marginalis	sb	1	-	1	5	7.5	7.1	15.5	221	1.8	0.4	0.2	0.08	9.1	176	3.3	0.0058	100	7.60481	3.28242	4.48489	49.1388	3.8999	17.3546	10.0747	4.1599	33.8004	66.1996	1.10667	1.7903	39624.8	65.4217	18461.4	30.4803	5740.96	31.0971	5532.02	29.9653	6152.93
K09/1/B	K9	K9/1	B	river pocket water	river pocket, Phalaris arundinacea	river	2008	5	7	05.24. Hygrotus impressopunctatus	sb	-	2	2	5	7.5	7.1	15.5	221	1.8	0.4	0.2	0.08	9.1	176	3.3	0.0058	100	7.60481	3.28242	4.48489	49.1388	3.8999	17.3546	10.0747	4.1599	33.8004	66.1996	1.10667	1.7903	39624.8	65.4217	18461.4	30.4803	5740.96	31.0971	5532.02	29.9653	6152.93
K09/1/B	K9	K9/1	B	river pocket water	river current Sagittaria	river	2008	6	4	05.16. Hydroporus incognitus	sa	-	6	6	5	2.4	7.4	19	243	0.4	2.1	0.2	0.6	5.4	193	2.5	0.0047	100	7.60481	3.28242	4.48489	49.1388	3.8999	17.3546	10.0747	4.1599	33.8004	66.1996	1.10667	1.7903	39624.8	65.4217	18461.4	30.4803	5740.96	31.0971	5532.02	29.9653	6152.93
K09/1/B	K9	K9/3	B	river pocket water	river pocket, Potamogeton	river	2008	10	14	02.02. Haliplus fluviatilis	re	-	1	1	5	2.2	6.89	11.2	190.1	0.4	2.3	0.1	0	1.5	223	1.5	0.0031	100	72.0328	4.80514	3.76439	13.0868	1.28432	3.83082	0.819309	0.376439	28.5327	71.4673	-0.44	-0.0663636	39624.8	65.4217	18461.4	30.4803	5740.96	31.0971	5532.02	29.9653	6152.93
K10/3/A	K10	K10/3	A	river pocket water	river pocket water	river	2008	10	15	01.02. Gyrinus substriatus	sb	-	1	1	3	6.7	7.51	11.7	179.4	2.7	1.2	0.2	0	11.2	260	6.1	0.0317	100	0.640539	1.03666	1.12937	31.9174	7.39992	42.048	10.788	5.04003	13.329	86.671	1.24667	1.9903	45375.9	74.9169	5751.1	9.49523	380.19	6.61074	1064.66	18.5123	4162.91
K10/3/A	K10	K10/3	A	river pocket water	river pocket water	river	2008	10	15	05.07. Acilius canaliculatus	sa	-	1	1	3	6.7	7.51	11.7	179.4	2.7	1.2	0.2	0	11.2	260	6.1	0.0317	100	0.640539	1.03666	1.12937	31.9174	7.39992	42.048	10.788	5.04003	13.329	86.671	1.24667	1.9903	45375.9	74.9169	5751.1	9.49523	380.19	6.61074	1064.66	18.5123	4162.91
K10/3/A	K10	K10/3	A	river pocket water	river pocket water	river	2008	10	15	11.01. Hydraena palustris	sa	-	24	24	3	6.7	7.51	11.7	179.4	2.7	1.2	0.2	0	11.2	260	6.1	0.0317	100	0.640539	1.03666	1.12937	31.9174	7.39992	42.048	10.788	5.04003	13.329	86.671	1.24667	1.9903	45375.9	74.9169	5751.1	9.49523	380.19	6.61074	1064.66	18.5123	4162.91
K11/1/A	K11	K11/1	A	river current	stones	river	2008	6	5	12.05. Oulimnius tuberculatus	rb	-	3	3	0	5.3	7.85	17.7	213	0.3	7.5	0.3	0.2	21.9	155	4.5	0.4974	2.2	8.11778	7.91042	14.9586	65.4087	1.78667	1.53612	0.212534	0.0691169	3.94286	96.0571	-0.553333	0.945	57566.7	95.0443	12190.8	20.1274	3079.45	25.2604	2793.14	22.9119	5859.79
K11/1/A	K11	K11/1	A	river current	stones	river	2008	6	5	11.01. Hydraena palustris	sa	-	5	5	0	5.3	7.85	17.7	213	0.3	7.5	0.3	0.2	21.9	155	4.5	0.4974	2.2	8.11778	7.91042	14.9586	65.4087	1.78667	1.53612	0.212534	0.0691169	3.94286	96.0571	-0.553333	0.945	57566.7	95.0443	12190.8	20.1274	3079.45	25.2604	2793.14	22.9119	5859.79
K11/1/A	K11	K11/1	A	river current	stones	river	2008	9	12	11.01. Hydraena palustris	sa	-	1	1	1	6.7	7.86	14.2	262	0.3	1.8	0.2	0.04	75	165	7.1	0.5838	1.89809	0.145466	0.0517214	0.119606	70.2925	16.0562	12.5748	0.543074	0.216583	0.521543	99.4785	0.58	1.46803	57566.7	95.0443	12190.8	20.1274	3079.45	25.2604	2793.14	22.9119	5859.79
K11/1/A	K11	K11/1	A	river current	stones	river	2008	9	12	12.02. Elmis aenea	rb	-	2	2	1	6.7	7.86	14.2	262	0.3	1.8	0.2	0.04	75	165	7.1	0.5838	1.89809	0.145466	0.0517214	0.119606	70.2925	16.0562	12.5748	0.543074	0.216583	0.521543	99.4785	0.58	1.46803	57566.7	95.0443	12190.8	20.1274	3079.45	25.2604	2793.14	22.9119	5859.79
K11/1/A	K11	K11/1	A	river current	stones	river	2008	10	15	11.01. Hydraena palustris	sa	-	26	26	1	8.8	7.54	11.6	181	0.7	1.8	0.2	0	4.5	141	8.5	0.5172	3.33333	0.150371	0.0575889	0.111979	69.9226	16.0929	13.1591	0.457512	0.0479908	0.521543	99.4785	0.58	1.46803	57566.7	95.0443	12190.8	20.1274	3079.45	25.2604	2793.14	22.9119	5859.79
K11/1/A	K11	K11/1	A	river current	stones	river	2008	10	15	12.04. Limnius volckmari	rb	-	1	1	1	8.8	7.54	11.6	181	0.7	1.8	0.2	0	4.5	141	8.5	0.5172	3.33333	0.150371	0.0575889	0.111979	69.9226	16.0929	13.1591	0.457512	0.0479908	0.521543	99.4785	0.58	1.46803	57566.7	95.0443	12190.8	20.1274	3079.45	25.2604	2793.14	22.9119	5859.79
K11/1/A	K11	K11/1	A	river current	stones	river	2008	10	15	12.05. Oulimnius tuberculatus	rb	-	1	1	1	8.8	7.54	11.6	181	0.7	1.8	0.2	0	4.5	141	8.5	0.5172	3.33333	0.150371	0.0575889	0.111979	69.9226	16.0929	13.1591	0.457512	0.0479908	0.521543	99.4785	0.58	1.46803	57566.7	95.0443	12190.8	20.1274	3079.45	25.2604	2793.14	22.9119	5859.79
K11/1/B	K11	K11/1	B	river current	stones	river	2008	7	9	11.01. Hydraena palustris	sa	-	4	4	1	9.9	8.03	15.6	273	0.7	2.5	0.1	0.03	27.2	134	4.8	0.4662	0.413002	8.67292	8.86237	14.9474	64.5202	1.508	1.1329	0.354267	0.00189448	3.94286	96.0571	-0.553333	0.945	57566.7	95.0443	12190.8	20.1274	3079.45	25.2604	2793.14	22.9119	5859.79
K11/1/B	K11	K11/1	B	river current	stones	river	2008	7	9	12.05. Oulimnius tuberculatus	rb	-	2	2	1	9.9	8.03	15.6	273	0.7	2.5	0.1	0.03	27.2	134	4.8	0.4662	0.413002	8.67292	8.86237	14.9474	64.5202	1.508	1.1329	0.354267	0.00189448	3.94286	96.0571	-0.553333	0.945	57566.7	95.0443	12190.8	20.1274	3079.45	25.2604	2793.14	22.9119	5859.79
K11/1/B	K11	K11/1	B	river current	stones	river	2008	8	7	11.01. Hydraena palustris	sa	-	2	2	1	9.6	7.89	17.9	204	0.4	2.6	0.2	0.05	23.5	166	5.5	0.5289	9	11.2842	0.509921	0.676426	21.9093	10.9963	52.5288	1.45692	0.638268	0.842828	99.1572	1.24667	1.66303	57566.7	95.0443	12190.8	20.1274	3079.45	25.2604	2793.14	22.9119	5859.79
K11/1/B	K11	K11/1	B	river current	stones	river	2008	9	12	11.01. Hydraena palustris	sa	-	6	6	1	6.7	7.86	14.2	262	0.3	1.8	0.2	0.04	75	165	7.1	0.5838	1.89809	0.145466	0.0517214	0.119606	70.2925	16.0562	12.5748	0.543074	0.216583	0.521543	99.4785	0.58	1.46803	57566.7	95.0443	12190.8	20.1274	3079.45	25.2604	2793.14	22.9119	5859.79
K11/1/B	K11	K11/1	B	river current	stones	river	2008	9	12	12.02. Elmis aenea	rb	-	1	1	1	6.7	7.86	14.2	262	0.3	1.8	0.2	0.04	75	165	7.1	0.5838	1.89809	0.145466	0.0517214	0.119606	70.2925	16.0562	12.5748	0.543074	0.216583	0.521543	99.4785	0.58	1.46803	57566.7	95.0443	12190.8	20.1274	3079.45	25.2604	2793.14	22.9119	5859.79
K11/1/B	K11	K11/1	B	river current	stones	river	2008	10	15	11.01. Hydraena palustris	sa	-	3	3	1	8.8	7.54	11.6	181	0.7	1.8	0.2	0	4.5	141	8.5	0.5172	3.33333	0.150371	0.0575889	0.111979	69.9226	16.0929	13.1591	0.457512	0.0479908	0.521543	99.4785	0.58	1.46803	57566.7	95.0443	12190.8	20.1274	3079.45	25.2604	2793.14	22.9119	5859.79
K11/1/C	K11	K11/1	C	river current	stones	river	2008	8	7	11.01. Hydraena palustris	sa	-	3	3	1	9.6	7.89	17.9	204	0.4	2.6	0.2	0.05	23.5	166	5.5	0.5289	9	11.2842	0.509921	0.676426	21.9093	10.9963	52.5288	1.45692	0.638268	0.842828	99.1572	1.24667	1.66303	57566.7	95.0443	12190.8	20.1274	3079.45	25.2604	2793.14	22.9119	5859.79
K11/1/C	K11	K11/1	C	river current	stones	river	2008	9	12	06.01. Helophorus granularis	sa	-	1	1	1	6.7	7.86	14.2	262	0.3	1.8	0.2	0.04	75	165	7.1	0.5838	1.89809	0.145466	0.0517214	0.119606	70.2925	16.0562	12.5748	0.543074	0.216583	0.521543	99.4785	0.58	1.46803	57566.7	95.0443	12190.8	20.1274	3079.45	25.2604	2793.14	22.9119	5859.79
K11/1/C	K11	K11/1	C	river current	stones	river	2008	9	12	06.01. Helophorus griseus	sa	-	1	1	1	6.7	7.86	14.2	262	0.3	1.8	0.2	0.04	75	165	7.1	0.5838	1.89809	0.145466	0.0517214	0.119606	70.2925	16.0562	12.5748	0.543074	0.216583	0.521543	99.4785	0.58	1.46803	57566.7	95.0443	12190.8	20.1274	3079.45	25.2604	2793.14	22.9119	5859.79
K11/1/C	K11	K11/1	C	river current	stones	river	2008	9	12	11.01. Hydraena palustris	sa	-	22	22	1	6.7	7.86	14.2	262	0.3	1.8	0.2	0.04	75	165	7.1	0.5838	1.89809	0.145466	0.0517214	0.119606	70.2925	16.0562	12.5748	0.543074	0.216583	0.521543	99.4785	0.58	1.46803	57566.7	95.0443	12190.8	20.1274	3079.45	25.2604	2793.14	22.9119	5859.79
K08/3/A	K8	K8/3	A	river pocket water	river current in front of the dam	river	2008	10	15	11.01. Hydraena palustris	sa	-	13	13	5	8.6	7.01	14.9	214	0.2	2	0.3	0.02	0	95	4.9	0.0027	100	7.18207	2.07002	1.63802	9.6391	2.40302	61.4616	11.1421	4.46404	9.32794	90.6721	1.24667	1.7903	21163.4	34.9414	4363.4	7.2041	479.55	10.9903	806.8	18.4902	2987.65
K08/3/A	K8	K8/3	A	river pocket water	river current in front of the dam	river	2008	10	15	12.05. Oulimnius tuberculatus	rb	-	2	2	5	8.6	7.01	14.9	214	0.2	2	0.3	0.02	0	95	4.9	0.0027	100	7.18207	2.07002	1.63802	9.6391	2.40302	61.4616	11.1421	4.46404	9.32794	90.6721	1.24667	1.7903	21163.4	34.9414	4363.4	7.2041	479.55	10.9903	806.8	18.4902	2987.65
K11/2/A	K11	K11/2	A	river current	river current sand	river	2008	9	7	11.01. Hydraena palustris	sa	-	2	2	0	6.7	7.86	14.2	262	0.3	1.8	0.2	0.04	75	165	7.1	0.4792	1.89809	13.172	1.12439	1.04093	19.8173	12.1135	49.2885	2.7319	0.711525	1.51244	98.4876	1.13333	1.74803	57566.7	95.0443	12190.8	20.1274	3079.45	25.2604	2793.14	22.9119	5859.79
K11/2/A	K11	K11/2	A	river current	river current sand	river	2008	9	7	12.05. Oulimnius tuberculatus	rb	-	1	1	0	6.7	7.86	14.2	262	0.3	1.8	0.2	0.04	75	165	7.1	0.4792	1.89809	13.172	1.12439	1.04093	19.8173	12.1135	49.2885	2.7319	0.711525	1.51244	98.4876	1.13333	1.74803	57566.7	95.0443	12190.8	20.1274	3079.45	25.2604	2793.14	22.9119	5859.79
K11/2/C	K11	K11/2	C	river current	river current sand	river	2008	9	12	11.01. Hydraena palustris	sa	-	20	20	0	6.7	7.86	14.2	262	0.3	1.8	0.2	0.04	75	165	7.1	0.4792	1.89809	13.172	1.12439	1.04093	19.8173	12.1135	49.2885	2.7319	0.711525	1.51244	98.4876	1.13333	1.74803	57566.7	95.0443	12190.8	20.1274	3079.45	25.2604	2793.14	22.9119	5859.79
K11/3/A	K11	K11/3	A	river pocket water	river pocket water	river	2008	10	15	11.01. Hydraena palustris	sa	-	3	3	0	8.8	7.54	11.6	181	0.7	1.8	0.2	0	4.5	141	8.5	0.0969	3.33333	8.90912	0.611214	1.22907	23.1763	4.4612	59.1715	2.12596	0.315573	0.606023	99.394	1.24667	1.66303	57566.7	95.0443	12190.8	20.1274	3079.45	25.2604	2793.14	22.9119	5859.79
K11/3/A	K11	K11/3	A	river pocket water	river pocket, meadow	river	2008	6	5	01.03. Orectochilus villosus	re	-	1	1	0	5.3	7.85	17.7	213	0.3	7.5	0.3	0.2	21.9	155	4.5	0.073	1.9	1.01861	0.835257	0.66549	13.887	7.09629	67.0651	6.62773	2.80456	6.32831	93.6717	2.12667	1.3303	57566.7	95.0443	12190.8	20.1274	3079.45	25.2604	2793.14	22.9119	5859.79
K11/3/A	K11	K11/3	A	river pocket water	river pocket, meadow	river	2008	6	5	06.01. Helophorus nubilus	sb	-	1	1	0	5.3	7.85	17.7	213	0.3	7.5	0.3	0.2	21.9	155	4.5	0.073	1.9	1.01861	0.835257	0.66549	13.887	7.09629	67.0651	6.62773	2.80456	6.32831	93.6717	2.12667	1.3303	57566.7	95.0443	12190.8	20.1274	3079.45	25.2604	2793.14	22.9119	5859.79
K11/3/A	K11	K11/3	A	river pocket water	river pocket water	river	2008	8	7	05.10. Dytiscus marginalis	sb	-	1	1	0	9.6	7.89	17.9	204	0.4	2.6	0.2	0.05	23.5	166	4.9	0.03	2.5375	0.362208	1.02181	1.079	4.56001	4.95272	79.9146	6.93915	1.1705	1.85719	98.1428	2.26667	0.69803	57566.7	95.0443	12190.8	20.1274	3079.45	25.2604	2793.14	22.9119	5859.79
K11/3/A	K11	K11/3	A	river pocket water	river pocket water	river	2008	9	12	06.01. Helophorus griseus	sa	-	2	2	0	6.7	7.86	14.2	262	0.3	1.8	0.2	0.04	75	165	7.1	0.053	1.89809	8.64301	0.519855	1.08666	22.991	4.90005	59.3775	2.04253	0.439361	0.606023	99.394	1.24667	1.66303	57566.7	95.0443	12190.8	20.1274	3079.45	25.2604	2793.14	22.9119	5859.79
K11/3/A	K11	K11/3	A	river pocket water	river pocket water	river	2008	9	12	10.01. Anacaena limbata	sb	-	1	1	0	6.7	7.86	14.2	262	0.3	1.8	0.2	0.04	75	165	7.1	0.053	1.89809	8.64301	0.519855	1.08666	22.991	4.90005	59.3775	2.04253	0.439361	0.606023	99.394	1.24667	1.66303	57566.7	95.0443	12190.8	20.1274	3079.45	25.2604	2793.14	22.9119	5859.79
K11/3/A	K11	K11/3	A	river pocket water	river pocket water	river	2008	9	12	11.01. Hydraena palustris	sa	-	1	1	0	6.7	7.86	14.2	262	0.3	1.8	0.2	0.04	75	165	7.1	0.053	1.89809	8.64301	0.519855	1.08666	22.991	4.90005	59.3775	2.04253	0.439361	0.606023	99.394	1.24667	1.66303	57566.7	95.0443	12190.8	20.1274	3079.45	25.2604	2793.14	22.9119	5859.79
K11/3/A	K11	K11/3	A	river pocket water	river pocket water	river	2008	9	12	11.02. Limnebius truncatellus	rb	-	1	1	0	6.7	7.86	14.2	262	0.3	1.8	0.2	0.04	75	165	7.1	0.053	1.89809	8.64301	0.519855	1.08666	22.991	4.90005	59.3775	2.04253	0.439361	0.606023	99.394	1.24667	1.66303	57566.7	95.0443	12190.8	20.1274	3079.45	25.2604	2793.14	22.9119	5859.79
K11/3/A	K11	K11/3	A	river pocket water	river pocket water	river	2008	9	12	11.03. Ochthebius minimus	sb	-	3	3	0	6.7	7.86	14.2	262	0.3	1.8	0.2	0.04	75	165	7.1	0.053	1.89809	8.64301	0.519855	1.08666	22.991	4.90005	59.3775	2.04253	0.439361	0.606023	99.394	1.24667	1.66303	57566.7	95.0443	12190.8	20.1274	3079.45	25.2604	2793.14	22.9119	5859.79
K11/3/A	K11	K11/3	A	river pocket water	river pocket water	river	2008	10	15	11.02. Limnebius parvulus	sb	-	1	1	0	8.8	7.54	11.6	181	0.7	1.8	0.2	0	4.5	141	8.5	0.0969	3.33333	8.90912	0.611214	1.22907	23.1763	4.4612	59.1715	2.12596	0.315573	0.606023	99.394	1.24667	1.66303	57566.7	95.0443	12190.8	20.1274	3079.45	25.2604	2793.14	22.9119	5859.79
K11/3/B	K11	K11/3	B	river current	river current sand	river	2008	4	17	14.06. Scirtes sp.	sb	1	-	1	0	8.5	7.2	14.8	247	1.3	0.4	0.2	0.05	8.7	133	4.9	0.0657	15.9574	0.146706	0.0666844	0.0233396	7.54535	11.8832	74.6366	4.73793	0.960256	2.10913	97.8909	2.26667	0.69803	57566.7	95.0443	12190.8	20.1274	3079.45	25.2604	2793.14	22.9119	5859.79
K11/3/B	K11	K11/3	B	river pocket water	river pocket water	river	2008	8	5	11.02. Limnebius atomus	sb	-	1	1	0	9.6	7.89	17.9	204	0.4	2.6	0.2	0.05	23.5	166	4.9	0.03	2.5375	0.362208	1.02181	1.079	4.56001	4.95272	79.9146	6.93915	1.1705	1.85719	98.1428	2.26667	0.69803	57566.7	95.0443	12190.8	20.1274	3079.45	25.2604	2793.14	22.9119	5859.79
K11/3/B	K11	K11/3	B	river pocket water	river pocket water	river	2008	8	7	05.16. Hydroporus erytrocephalus	sa	-	1	1	0	9.6	7.89	17.9	204	0.4	2.6	0.2	0.05	23.5	166	4.9	0.03	2.5375	0.362208	1.02181	1.079	4.56001	4.95272	79.9146	6.93915	1.1705	1.85719	98.1428	2.26667	0.69803	57566.7	95.0443	12190.8	20.1274	3079.45	25.2604	2793.14	22.9119	5859.79
K11/3/B	K11	K11/3	B	river pocket water	river pocket water	river	2008	8	7	11.01. Hydraena palustris	sa	-	1	1	0	9.6	7.89	17.9	204	0.4	2.6	0.2	0.05	23.5	166	4.9	0.03	2.5375	0.362208	1.02181	1.079	4.56001	4.95272	79.9146	6.93915	1.1705	1.85719	98.1428	2.26667	0.69803	57566.7	95.0443	12190.8	20.1274	3079.45	25.2604	2793.14	22.9119	5859.79
K11/3/B	K11	K11/3	B	river pocket water	river pocket water	river	2008	8	7	11.03. Ochthebius minimus	sb	-	1	1	0	9.6	7.89	17.9	204	0.4	2.6	0.2	0.05	23.5	166	4.9	0.03	2.5375	0.362208	1.02181	1.079	4.56001	4.95272	79.9146	6.93915	1.1705	1.85719	98.1428	2.26667	0.69803	57566.7	95.0443	12190.8	20.1274	3079.45	25.2604	2793.14	22.9119	5859.79
K11/3/B	K11	K11/3	B	river pocket water	river pocket water	river	2008	10	15	10.07. Enochrus melanocephalus	sa	-	1	1	0	8.8	7.54	11.6	181	0.7	1.8	0.2	0	4.5	141	8.5	0.0969	3.33333	8.90912	0.611214	1.22907	23.1763	4.4612	59.1715	2.12596	0.315573	0.606023	99.394	1.24667	1.66303	57566.7	95.0443	12190.8	20.1274	3079.45	25.2604	2793.14	22.9119	5859.79
K11/3/B	K11	K11/3	B	river pocket water	river pocket water	river	2008	10	15	11.01. Hydraena palustris	sa	-	1	1	0	8.8	7.54	11.6	181	0.7	1.8	0.2	0	4.5	141	8.5	0.0969	3.33333	8.90912	0.611214	1.22907	23.1763	4.4612	59.1715	2.12596	0.315573	0.606023	99.394	1.24667	1.66303	57566.7	95.0443	12190.8	20.1274	3079.45	25.2604	2793.14	22.9119	5859.79
K11/3/C	K11	K11/3	C	river pocket water	river pocket water	river	2008	6	5	06.01. Helophorus griseus	sa	-	1	1	0	5.3	7.85	17.7	213	0.3	7.5	0.3	0.2	21.9	155	4.5	0.073	1.9	1.01861	0.835257	0.66549	13.887	7.09629	67.0651	6.62773	2.80456	6.32831	93.6717	2.12667	1.3303	57566.7	95.0443	12190.8	20.1274	3079.45	25.2604	2793.14	22.9119	5859.79
K11/3/C	K11	K11/3	C	river pocket water	river pocket water	river	2008	6	5	12.05. Oulimnius tuberculatus	rb	-	1	1	0	5.3	7.85	17.7	213	0.3	7.5	0.3	0.2	21.9	155	4.5	0.073	1.9	1.01861	0.835257	0.66549	13.887	7.09629	67.0651	6.62773	2.80456	6.32831	93.6717	2.12667	1.3303	57566.7	95.0443	12190.8	20.1274	3079.45	25.2604	2793.14	22.9119	5859.79
K11/3/C	K11	K11/3	C	river pocket water	river pocket water	river	2008	8	7	10.01. Anacaena limbata	sb	-	1	1	0	9.6	7.89	17.9	204	0.4	2.6	0.2	0.05	23.5	166	4.9	0.03	2.5375	0.362208	1.02181	1.079	4.56001	4.95272	79.9146	6.93915	1.1705	1.85719	98.1428	2.26667	0.69803	57566.7	95.0443	12190.8	20.1274	3079.45	25.2604	2793.14	22.9119	5859.79
K11/3/C	K11	K11/3	C	river pocket water	river pocket water	river	2008	8	7	11.01. Hydraena palustris	sa	-	3	3	0	9.6	7.89	17.9	204	0.4	2.6	0.2	0.05	23.5	166	4.9	0.03	2.5375	0.362208	1.02181	1.079	4.56001	4.95272	79.9146	6.93915	1.1705	1.85719	98.1428	2.26667	0.69803	57566.7	95.0443	12190.8	20.1274	3079.45	25.2604	2793.14	22.9119	5859.79
K11/3/C	K11	K11/3	C	river pocket water	river pocket water	river	2008	8	7	11.02. Limnebius truncatellus	rb	-	1	1	0	9.6	7.89	17.9	204	0.4	2.6	0.2	0.05	23.5	166	4.9	0.03	2.5375	0.362208	1.02181	1.079	4.56001	4.95272	79.9146	6.93915	1.1705	1.85719	98.1428	2.26667	0.69803	57566.7	95.0443	12190.8	20.1274	3079.45	25.2604	2793.14	22.9119	5859.79
K11/3/C	K11	K11/3	C	river pocket water	river pocket water	river	2008	8	7	14.06. Scirtes sp.	sb	2	-	2	0	9.6	7.89	17.9	204	0.4	2.6	0.2	0.05	23.5	166	4.9	0.03	2.5375	0.362208	1.02181	1.079	4.56001	4.95272	79.9146	6.93915	1.1705	1.85719	98.1428	2.26667	0.69803	57566.7	95.0443	12190.8	20.1274	3079.45	25.2604	2793.14	22.9119	5859.79
K11/3/C	K11	K11/3	C	river pocket water	river pocket water	river	2008	8	7	17.01. Georissus sp.	sb	1	-	1	0	9.6	7.89	17.9	204	0.4	2.6	0.2	0.05	23.5	166	4.9	0.03	2.5375	0.362208	1.02181	1.079	4.56001	4.95272	79.9146	6.93915	1.1705	1.85719	98.1428	2.26667	0.69803	57566.7	95.0443	12190.8	20.1274	3079.45	25.2604	2793.14	22.9119	5859.79
K11/3/C	K11	K11/3	C	river pocket water	river pocket water	river	2008	9	12	05.16. Hydroporus erytrocephalus	sa	-	1	1	0	6.7	7.86	14.2	262	0.3	1.8	0.2	0.04	75	165	7.1	0.053	1.89809	8.64301	0.519855	1.08666	22.991	4.90005	59.3775	2.04253	0.439361	0.606023	99.394	1.24667	1.66303	57566.7	95.0443	12190.8	20.1274	3079.45	25.2604	2793.14	22.9119	5859.79
K11/3/C	K11	K11/3	C	river pocket water	river pocket water	river	2008	9	12	11.01. Hydraena palustris	sa	-	1	1	0	6.7	7.86	14.2	262	0.3	1.8	0.2	0.04	75	165	7.1	0.053	1.89809	8.64301	0.519855	1.08666	22.991	4.90005	59.3775	2.04253	0.439361	0.606023	99.394	1.24667	1.66303	57566.7	95.0443	12190.8	20.1274	3079.45	25.2604	2793.14	22.9119	5859.79
K11/3/C	K11	K11/3	C	river pocket water	river pocket water	river	2008	9	12	11.02. Limnebius parvulus	sb	-	1	1	0	6.7	7.86	14.2	262	0.3	1.8	0.2	0.04	75	165	7.1	0.053	1.89809	8.64301	0.519855	1.08666	22.991	4.90005	59.3775	2.04253	0.439361	0.606023	99.394	1.24667	1.66303	57566.7	95.0443	12190.8	20.1274	3079.45	25.2604	2793.14	22.9119	5859.79
K11/3/C	K11	K11/3	C	river pocket water	river pocket water	river	2008	9	12	11.03. Ochthebius minimus	sb	-	3	3	0	6.7	7.86	14.2	262	0.3	1.8	0.2	0.04	75	165	7.1	0.053	1.89809	8.64301	0.519855	1.08666	22.991	4.90005	59.3775	2.04253	0.439361	0.606023	99.394	1.24667	1.66303	57566.7	95.0443	12190.8	20.1274	3079.45	25.2604	2793.14	22.9119	5859.79
K11/4/A	K11	K11/4	A	river current	river current Sagittaria	river	2008	6	5	12.05. Oulimnius tuberculatus	rb	-	2	2	2	5.3	7.85	17.7	213	0.3	7.5	0.3	0.2	21.9	155	4.5	0.3489	48	0.146706	0.0666844	0.0233396	7.54535	11.8832	74.6366	4.73793	0.960256	0.64197	99.358	2.26667	0.69803	57566.7	95.0443	12190.8	20.1274	3079.45	25.2604	2793.14	22.9119	5859.79
K11/4/A	K11	K11/4	A	river current	river current, plants	river	2008	7	9	06.01. Helophorus griseus	sa	-	1	1	3	9.9	8.03	15.6	273	0.7	2.5	0.1	0.03	27.2	134	4.8	0.1282	0.42065	9.18306	7.1507	5.87736	47.4383	8.16439	21.3622	0.609208	0.214721	0.476613	99.5234	0.466667	1.35303	57566.7	95.0443	12190.8	20.1274	3079.45	25.2604	2793.14	22.9119	5859.79
K11/4/A	K11	K11/4	A	river current	river current, plants	river	2008	7	9	11.01. Hydraena palustris	sa	-	1	1	3	9.9	8.03	15.6	273	0.7	2.5	0.1	0.03	27.2	134	4.8	0.1282	0.42065	9.18306	7.1507	5.87736	47.4383	8.16439	21.3622	0.609208	0.214721	0.476613	99.5234	0.466667	1.35303	57566.7	95.0443	12190.8	20.1274	3079.45	25.2604	2793.14	22.9119	5859.79
K11/4/A	K11	K11/4	A	river current	river current, plants	river	2008	8	7	11.01. Hydraena palustris	sa	-	1	1	3	9.6	7.89	17.9	204	0.4	2.6	0.2	0.05	23.5	166	5.5	0.3273	24.5	0.38584	0.235791	0.183733	56.5134	15.2193	26.0595	1.07178	0.33072	0.768904	99.2311	1.10667	1.86303	57566.7	95.0443	12190.8	20.1274	3079.45	25.2604	2793.14	22.9119	5859.79
K11/4/B	K11	K11/4	B	river current	river current, plants	river	2008	7	9	05.07. Acilius canaliculatus	sa	-	1	1	3	9.9	8.03	15.6	273	0.7	2.5	0.1	0.03	27.2	134	4.8	0.1282	0.42065	9.18306	7.1507	5.87736	47.4383	8.16439	21.3622	0.609208	0.214721	0.476613	99.5234	0.466667	1.35303	57566.7	95.0443	12190.8	20.1274	3079.45	25.2604	2793.14	22.9119	5859.79
K11/4/B	K11	K11/4	B	river current	river current, plants	river	2008	7	9	06.01. Helophorus griseus	sa	-	1	1	3	9.9	8.03	15.6	273	0.7	2.5	0.1	0.03	27.2	134	4.8	0.1282	0.42065	9.18306	7.1507	5.87736	47.4383	8.16439	21.3622	0.609208	0.214721	0.476613	99.5234	0.466667	1.35303	57566.7	95.0443	12190.8	20.1274	3079.45	25.2604	2793.14	22.9119	5859.79
K11/4/B	K11	K11/4	B	river current	river current, plants	river	2008	7	9	10.07. Enochrus testaceus	sb	-	1	1	3	9.9	8.03	15.6	273	0.7	2.5	0.1	0.03	27.2	134	4.8	0.1282	0.42065	9.18306	7.1507	5.87736	47.4383	8.16439	21.3622	0.609208	0.214721	0.476613	99.5234	0.466667	1.35303	57566.7	95.0443	12190.8	20.1274	3079.45	25.2604	2793.14	22.9119	5859.79
K11/4/B	K11	K11/4	B	river current	river current, plants	river	2008	7	9	10.08. Helochares obscurus	sb	-	1	1	3	9.9	8.03	15.6	273	0.7	2.5	0.1	0.03	27.2	134	4.8	0.1282	0.42065	9.18306	7.1507	5.87736	47.4383	8.16439	21.3622	0.609208	0.214721	0.476613	99.5234	0.466667	1.35303	57566.7	95.0443	12190.8	20.1274	3079.45	25.2604	2793.14	22.9119	5859.79
K11/4/B	K11	K11/4	B	river current	river current, plants	river	2008	7	9	10.09. Hydrobius fuscipes	sb	-	1	1	3	9.9	8.03	15.6	273	0.7	2.5	0.1	0.03	27.2	134	4.8	0.1282	0.42065	9.18306	7.1507	5.87736	47.4383	8.16439	21.3622	0.609208	0.214721	0.476613	99.5234	0.466667	1.35303	57566.7	95.0443	12190.8	20.1274	3079.45	25.2604	2793.14	22.9119	5859.79
K11/4/B	K11	K11/4	B	river current	river current, plants	river	2008	7	9	11.01. Hydraena palustris	sa	-	2	2	3	9.9	8.03	15.6	273	0.7	2.5	0.1	0.03	27.2	134	4.8	0.1282	0.42065	9.18306	7.1507	5.87736	47.4383	8.16439	21.3622	0.609208	0.214721	0.476613	99.5234	0.466667	1.35303	57566.7	95.0443	12190.8	20.1274	3079.45	25.2604	2793.14	22.9119	5859.79
K11/4/B	K11	K11/4	B	river current	river current, plants	river	2008	7	9	11.02. Limnebius truncatellus	rb	-	2	2	3	9.9	8.03	15.6	273	0.7	2.5	0.1	0.03	27.2	134	4.8	0.1282	0.42065	9.18306	7.1507	5.87736	47.4383	8.16439	21.3622	0.609208	0.214721	0.476613	99.5234	0.466667	1.35303	57566.7	95.0443	12190.8	20.1274	3079.45	25.2604	2793.14	22.9119	5859.79
K11/4/B	K11	K11/4	B	river current	river current, plants	river	2008	7	9	11.03. Ochthebius minimus	sb	-	1	1	3	9.9	8.03	15.6	273	0.7	2.5	0.1	0.03	27.2	134	4.8	0.1282	0.42065	9.18306	7.1507	5.87736	47.4383	8.16439	21.3622	0.609208	0.214721	0.476613	99.5234	0.466667	1.35303	57566.7	95.0443	12190.8	20.1274	3079.45	25.2604	2793.14	22.9119	5859.79
K11/4/B	K11	K11/4	B	river current	river current, plants	river	2008	9	12	11.01. Hydraena palustris	sa	-	1	1	3	6.7	7.86	14.2	262	0.3	1.8	0.2	0.04	75	165	7.1	0.4285	3.3121	0.968609	0.101425	0.0963538	6.263	10.4873	75.8355	5.27917	0.968609	2.02991	97.9701	2.26667	0.69803	57566.7	95.0443	12190.8	20.1274	3079.45	25.2604	2793.14	22.9119	5859.79
K11/4/C	K11	K11/4	C	river current	river current, plants	river	2008	8	7	05.02. Ilybius fuliginosus	re	-	2	2	3	9.6	7.89	17.9	204	0.4	2.6	0.2	0.05	23.5	166	5.5	0.3273	24.5	0.38584	0.235791	0.183733	56.5134	15.2193	26.0595	1.07178	0.33072	0.768904	99.2311	1.10667	1.86303	57566.7	95.0443	12190.8	20.1274	3079.45	25.2604	2793.14	22.9119	5859.79
K11/4/C	K11	K11/4	C	river current	river current, plants	river	2008	8	7	06.01. Helophorus griseus	sa	-	1	1	3	9.6	7.89	17.9	204	0.4	2.6	0.2	0.05	23.5	166	5.5	0.3273	24.5	0.38584	0.235791	0.183733	56.5134	15.2193	26.0595	1.07178	0.33072	0.768904	99.2311	1.10667	1.86303	57566.7	95.0443	12190.8	20.1274	3079.45	25.2604	2793.14	22.9119	5859.79
K11/4/C	K11	K11/4	C	river current	river current, plants	river	2008	8	7	11.02. Limnebius parvulus	sb	-	1	1	3	9.6	7.89	17.9	204	0.4	2.6	0.2	0.05	23.5	166	5.5	0.3273	24.5	0.38584	0.235791	0.183733	56.5134	15.2193	26.0595	1.07178	0.33072	0.768904	99.2311	1.10667	1.86303	57566.7	95.0443	12190.8	20.1274	3079.45	25.2604	2793.14	22.9119	5859.79
K11/4/C	K11	K11/4	C	river current	river current, plants	river	2008	9	12	10.01. Anacaena limbata	sb	-	1	1	3	6.7	7.86	14.2	262	0.3	1.8	0.2	0.04	75	165	7.1	0.4285	3.3121	0.968609	0.101425	0.0963538	6.263	10.4873	75.8355	5.27917	0.968609	2.02991	97.9701	2.26667	0.69803	57566.7	95.0443	12190.8	20.1274	3079.45	25.2604	2793.14	22.9119	5859.79
K12/3/A	K12	K12/3	A	river current	stones	river	2008	5	8	12.02. Elmis aenea	rb	-	1	1	2	7.3	7.3	14.9	305	1.5	0.4	0.1	0.03	1.5	275	5.1	1.034	80.4598	17.914	5.58096	4.15531	27.2269	7.86018	35.31	1.30177	0.650886	0.290407	99.7096	1.54667	1.33303	59535.3	98.2945	1968.6	3.25022	182.17	9.25378	145.31	7.38139	1592.58
K12/3/A	K12	K12/3	A	river current	river current, stones	river	2008	7	10	11.01. Hydraena palustris	sa	-	10	10	2	9.8	7.44	11.1	296	0.5	2.8	0.3	0.03	28	118	4.9	0.8122	0.621622	20.2601	6.41696	5.05918	24.1332	7.16868	36.3532	0.462999	0.145663	0.290407	99.7096	1.54667	1.33303	59535.3	98.2945	1968.6	3.25022	182.17	9.25378	145.31	7.38139	1592.58
K12/3/A	K12	K12/3	A	river current	river current, stones	river	2008	7	10	12.02. Elmis aenea	rb	-	2	2	2	9.8	7.44	11.1	296	0.5	2.8	0.3	0.03	28	118	4.9	0.8122	0.621622	20.2601	6.41696	5.05918	24.1332	7.16868	36.3532	0.462999	0.145663	0.290407	99.7096	1.54667	1.33303	59535.3	98.2945	1968.6	3.25022	182.17	9.25378	145.31	7.38139	1592.58
K12/3/A	K12	K12/3	A	river current	stones	river	2008	8	6	05.27. Laccophilus hyalinus	re	-	1	1	2	9.6	7.1	16.2	244	0.9	2.3	0.4	0.09	13.5	107	4.9	0.8995	48.8372	19.4851	5.95572	6.98758	23.7653	6.62442	36.4281	0.363154	0.390703	0.290407	99.7096	1.54667	1.33303	59535.3	98.2945	1968.6	3.25022	182.17	9.25378	145.31	7.38139	1592.58
K12/3/A	K12	K12/3	A	river current	stones	river	2008	8	8	11.01. Hydraena palustris	sa	-	56	56	2	9.6	7.1	16.2	244	0.9	2.3	0.4	0.09	13.5	107	4.9	0.8995	48.8372	19.4851	5.95572	6.98758	23.7653	6.62442	36.4281	0.363154	0.390703	0.290407	99.7096	1.54667	1.33303	59535.3	98.2945	1968.6	3.25022	182.17	9.25378	145.31	7.38139	1592.58
K12/3/A	K12	K12/3	A	river current	stones	river	2008	8	8	12.02. Elmis aenea	rb	-	1	1	2	9.6	7.1	16.2	244	0.9	2.3	0.4	0.09	13.5	107	4.9	0.8995	48.8372	19.4851	5.95572	6.98758	23.7653	6.62442	36.4281	0.363154	0.390703	0.290407	99.7096	1.54667	1.33303	59535.3	98.2945	1968.6	3.25022	182.17	9.25378	145.31	7.38139	1592.58
K12/3/A	K12	K12/3	A	river current	stones	river	2008	9	12	11.01. Hydraena palustris	sa	-	27	27	2	8.9	7.78	14.9	227	0.1	1.3	0.6	0.09	15.3	202	4.5	1.172	2.44204	17.7058	4.95529	5.77103	24.7714	9.5939	36.202	0.676412	0.324272	0.290407	99.7096	1.54667	1.33303	59535.3	98.2945	1968.6	3.25022	182.17	9.25378	145.31	7.38139	1592.58
K12/3/B	K12	K12/3	B	river current	stones	river	2008	8	6	11.01. Hydraena palustris	sa	-	78	78	2	9.6	7.1	16.2	244	0.9	2.3	0.4	0.09	13.5	107	4.9	0.8995	48.8372	19.4851	5.95572	6.98758	23.7653	6.62442	36.4281	0.363154	0.390703	0.290407	99.7096	1.54667	1.33303	59535.3	98.2945	1968.6	3.25022	182.17	9.25378	145.31	7.38139	1592.58
K12/3/B	K12	K12/3	B	river current	stones	river	2008	8	6	12.04. Limnius volckmari	rb	-	1	1	2	9.6	7.1	16.2	244	0.9	2.3	0.4	0.09	13.5	107	4.9	0.8995	48.8372	19.4851	5.95572	6.98758	23.7653	6.62442	36.4281	0.363154	0.390703	0.290407	99.7096	1.54667	1.33303	59535.3	98.2945	1968.6	3.25022	182.17	9.25378	145.31	7.38139	1592.58
K12/3/B	K12	K12/3	B	river current	stones	river	2008	8	6	12.05. Oulimnius tuberculatus	rb	-	2	2	2	9.6	7.1	16.2	244	0.9	2.3	0.4	0.09	13.5	107	4.9	0.8995	48.8372	19.4851	5.95572	6.98758	23.7653	6.62442	36.4281	0.363154	0.390703	0.290407	99.7096	1.54667	1.33303	59535.3	98.2945	1968.6	3.25022	182.17	9.25378	145.31	7.38139	1592.58
K12/3/B	K12	K12/3	B	river current	stones	river	2008	9	12	11.01. Hydraena gracilis	rb	-	1	1	2	8.9	7.78	14.9	227	0.1	1.3	0.6	0.09	15.3	202	4.5	1.172	2.44204	17.7058	4.95529	5.77103	24.7714	9.5939	36.202	0.676412	0.324272	0.290407	99.7096	1.54667	1.33303	59535.3	98.2945	1968.6	3.25022	182.17	9.25378	145.31	7.38139	1592.58
K12/3/B	K12	K12/3	B	river current	stones	river	2008	9	12	11.01. Hydraena palustris	sa	-	37	37	2	8.9	7.78	14.9	227	0.1	1.3	0.6	0.09	15.3	202	4.5	1.172	2.44204	17.7058	4.95529	5.77103	24.7714	9.5939	36.202	0.676412	0.324272	0.290407	99.7096	1.54667	1.33303	59535.3	98.2945	1968.6	3.25022	182.17	9.25378	145.31	7.38139	1592.58
K12/3/B	K12	K12/3	B	river current	stones	river	2008	9	12	12.02. Elmis aenea	rb	-	4	4	2	8.9	7.78	14.9	227	0.1	1.3	0.6	0.09	15.3	202	4.5	1.172	2.44204	17.7058	4.95529	5.77103	24.7714	9.5939	36.202	0.676412	0.324272	0.290407	99.7096	1.54667	1.33303	59535.3	98.2945	1968.6	3.25022	182.17	9.25378	145.31	7.38139	1592.58
K12/3/B	K12	K12/3	B	river current	stones	river	2008	9	12	14.06. Scirtes sp.	sb	2	-	2	2	8.9	7.78	14.9	227	0.1	1.3	0.6	0.09	15.3	202	4.5	1.172	2.44204	17.7058	4.95529	5.77103	24.7714	9.5939	36.202	0.676412	0.324272	0.290407	99.7096	1.54667	1.33303	59535.3	98.2945	1968.6	3.25022	182.17	9.25378	145.31	7.38139	1592.58
K12/3/B	K12	K12/3	B	river current	stones	river	2008	10	15	11.01. Hydraena palustris	sa	-	14	14	2	7.9	7.1	12.5	232	0.9	1.7	0.8	0.09	25.5	232	7.1	0.9782	2.96	20.3892	6.25712	5.08937	23.8395	7.5758	36.3326	0.4528	0.0635509	0.290407	99.7096	1.02	0.93803	59535.3	98.2945	1968.6	3.25022	182.17	9.25378	145.31	7.38139	1592.58
K12/3/B	K12	K12/3	B	river current	stones	river	2008	10	15	12.02. Elmis aenea	rb	-	2	2	2	7.9	7.1	12.5	232	0.9	1.7	0.8	0.09	25.5	232	7.1	0.9782	2.96	20.3892	6.25712	5.08937	23.8395	7.5758	36.3326	0.4528	0.0635509	0.290407	99.7096	1.02	0.93803	59535.3	98.2945	1968.6	3.25022	182.17	9.25378	145.31	7.38139	1592.58
K12/3/C	K12	K12/3	C	river current	stones	river	2008	5	7	10.15. Cercyon tristis	sb	-	1	1	2
K12/3/C	K12	K12/3	C	river current	stones	river	2008	7	10	11.01. Hydraena palustris	sa	-	12	12	2	9.8	7.44	11.1	296	0.5	2.8	0.3	0.03	28	118	4.9	0.8122	0.621622	20.2601	6.41696	5.05918	24.1332	7.16868	36.3532	0.462999	0.145663	0.290407	99.7096	1.54667	1.33303	59535.3	98.2945	1968.6	3.25022	182.17	9.25378	145.31	7.38139	1592.58
K12/3/C	K12	K12/3	C	river current	stones	river	2008	7	10	12.02. Elmis aenea	rb	-	1	1	2	9.8	7.44	11.1	296	0.5	2.8	0.3	0.03	28	118	4.9	0.8122	0.621622	20.2601	6.41696	5.05918	24.1332	7.16868	36.3532	0.462999	0.145663	0.290407	99.7096	1.54667	1.33303	59535.3	98.2945	1968.6	3.25022	182.17	9.25378	145.31	7.38139	1592.58
K12/3/C	K12	K12/3	C	river current	stones	river	2008	8	6	11.01. Hydraena palustris	sa	-	17	17	2	9.6	7.1	16.2	244	0.9	2.3	0.4	0.09	13.5	107	4.9	0.8995	48.8372	19.4851	5.95572	6.98758	23.7653	6.62442	36.4281	0.363154	0.390703	0.290407	99.7096	1.54667	1.33303	59535.3	98.2945	1968.6	3.25022	182.17	9.25378	145.31	7.38139	1592.58
K12/3/C	K12	K12/3	C	river current	stones	river	2008	8	6	11.02. Limnebius parvulus	sb	-	1	1	2	9.6	7.1	16.2	244	0.9	2.3	0.4	0.09	13.5	107	4.9	0.8995	48.8372	19.4851	5.95572	6.98758	23.7653	6.62442	36.4281	0.363154	0.390703	0.290407	99.7096	1.54667	1.33303	59535.3	98.2945	1968.6	3.25022	182.17	9.25378	145.31	7.38139	1592.58
K12/3/C	K12	K12/3	C	river current	stones	river	2008	8	6	12.02. Elmis aenea	rb	-	6	6	2	9.6	7.1	16.2	244	0.9	2.3	0.4	0.09	13.5	107	4.9	0.8995	48.8372	19.4851	5.95572	6.98758	23.7653	6.62442	36.4281	0.363154	0.390703	0.290407	99.7096	1.54667	1.33303	59535.3	98.2945	1968.6	3.25022	182.17	9.25378	145.31	7.38139	1592.58
K12/3/C	K12	K12/3	C	river current	stones	river	2008	8	6	12.05. Oulimnius tuberculatus	rb	-	1	1	2	9.6	7.1	16.2	244	0.9	2.3	0.4	0.09	13.5	107	4.9	0.8995	48.8372	19.4851	5.95572	6.98758	23.7653	6.62442	36.4281	0.363154	0.390703	0.290407	99.7096	1.54667	1.33303	59535.3	98.2945	1968.6	3.25022	182.17	9.25378	145.31	7.38139	1592.58
K12/3/C	K12	K12/3	C	river current	stones	river	2008	9	12	11.01. Hydraena palustris	sa	-	11	11	2	8.9	7.78	14.9	227	0.1	1.3	0.6	0.09	15.3	202	4.5	1.172	2.44204	17.7058	4.95529	5.77103	24.7714	9.5939	36.202	0.676412	0.324272	0.290407	99.7096	1.54667	1.33303	59535.3	98.2945	1968.6	3.25022	182.17	9.25378	145.31	7.38139	1592.58
K12/3/C	K12	K12/3	C	river current	stones	river	2008	9	12	12.02. Elmis aenea	rb	-	6	6	2	8.9	7.78	14.9	227	0.1	1.3	0.6	0.09	15.3	202	4.5	1.172	2.44204	17.7058	4.95529	5.77103	24.7714	9.5939	36.202	0.676412	0.324272	0.290407	99.7096	1.54667	1.33303	59535.3	98.2945	1968.6	3.25022	182.17	9.25378	145.31	7.38139	1592.58
K12/3/C	K12	K12/3	C	river current	stones	river	2008	10	15	11.01. Hydraena palustris	sa	-	7	7	2	7.9	7.1	12.5	232	0.9	1.7	0.8	0.09	25.5	232	7.1	0.9782	2.96	20.3892	6.25712	5.08937	23.8395	7.5758	36.3326	0.4528	0.0635509	0.290407	99.7096	1.02	0.93803	59535.3	98.2945	1968.6	3.25022	182.17	9.25378	145.31	7.38139	1592.58
K12/4/B	K12	K12/4	B	river current	river current sand	river	2008	7	10	01.02. Gyrinus substriatus	sb	-	1	1	0	9.8	7.44	11.1	296	0.5	2.8	0.3	0.03	28	118	4.9	0.0562	3.02027	0	0	0.0431313	4.28438	9.14025	82.3737	1.64618	2.5124	0.913349	99.0867	2.26667	0.69803	59535.3	98.2945	1968.6	3.25022	182.17	9.25378	145.31	7.38139	1592.58
K12/4/B	K12	K12/4	B	river current	river current sand	river	2008	7	10	05.16. Hydroporus incognitus	sa	-	1	1	0	9.8	7.44	11.1	296	0.5	2.8	0.3	0.03	28	118	4.9	0.0562	3.02027	0	0	0.0431313	4.28438	9.14025	82.3737	1.64618	2.5124	0.913349	99.0867	2.26667	0.69803	59535.3	98.2945	1968.6	3.25022	182.17	9.25378	145.31	7.38139	1592.58
K12/4/B	K12	K12/4	B	river current	river current sand	river	2008	7	10	05.24. Hygrotus decoratus	sa	-	1	1	0	9.8	7.44	11.1	296	0.5	2.8	0.3	0.03	28	118	4.9	0.0562	3.02027	0	0	0.0431313	4.28438	9.14025	82.3737	1.64618	2.5124	0.913349	99.0867	2.26667	0.69803	59535.3	98.2945	1968.6	3.25022	182.17	9.25378	145.31	7.38139	1592.58
K12/4/C	K12	K12/4	C	river current	river current sand	river	2008	6	5	11.03. Ochthebius minimus	sb	-	1	1	0	5.9	7.94	17.8	296	1.2	0.4	0.9	1.7	47.7	61	5.2	0.0572	75.6757	0	0	0.0543537	6.54962	13.5286	74.0461	2.37526	3.44603	0.913349	99.0867	2.26667	0.69803	59535.3	98.2945	1968.6	3.25022	182.17	9.25378	145.31	7.38139	1592.58
K12/5/A	K12	K12/5	A	river pocket water	river pocket water	river	2008	8	6	01.02. Gyrinus substriatus	sb	-	1	1	1	9.6	7.1	16.2	244	0.9	2.3	0.4	0.09	13.5	107	6.2	0.0085	54.6512	0.824189	0.460012	0.445637	6.02808	8.42877	77.6559	5.23264	0.924817	1.69804	98.302	2.26667	0.69803	59535.3	98.2945	1968.6	3.25022	182.17	9.25378	145.31	7.38139	1592.58
K12/5/A	K12	K12/5	A	river pocket water	river pocket water	river	2008	8	6	02.02. Haliplus lineatocollis	re	-	1	1	1	9.6	7.1	16.2	244	0.9	2.3	0.4	0.09	13.5	107	6.2	0.0085	54.6512	0.824189	0.460012	0.445637	6.02808	8.42877	77.6559	5.23264	0.924817	1.69804	98.302	2.26667	0.69803	59535.3	98.2945	1968.6	3.25022	182.17	9.25378	145.31	7.38139	1592.58
K12/5/A	K12	K12/5	A	river pocket water	river pocket water	river	2008	9	10	06.01. Helophorus granularis	sa	1	-	1	1	8.9	7.78	14.9	227	0.1	1.3	0.6	0.09	15.3	202	4.3	0.0265	2.44204	0.703921	0.173031	0.216288	33.1629	23.135	32.8601	8.55323	1.19549	1.83734	98.1627	1.24667	1.9903	59535.3	98.2945	1968.6	3.25022	182.17	9.25378	145.31	7.38139	1592.58
K12/5/A	K12	K12/5	A	river pocket water	river pocket water	river	2008	9	10	11.03. Ochthebius minimus	sb	1	-	1	1	8.9	7.78	14.9	227	0.1	1.3	0.6	0.09	15.3	202	4.3	0.0265	2.44204	0.703921	0.173031	0.216288	33.1629	23.135	32.8601	8.55323	1.19549	1.83734	98.1627	1.24667	1.9903	59535.3	98.2945	1968.6	3.25022	182.17	9.25378	145.31	7.38139	1592.58
K12/5/B	K12	K12/5	B	river pocket water	river pocket water	river	2008	6	5	10.01. Anacaena limbata	sb	-	1	1	1	9.8	7.44	11.1	296	0.5	2.8	0.3	0.03	28	118	4.9	-0.0151	93.2432	3.7289	0.860515	0.753975	12.0226	2.89297	67.7512	1.31946	10.6704	19.6903	80.3097	2.12667	1.38182	59535.3	98.2945	1968.6	3.25022	182.17	9.25378	145.31	7.38139	1592.58
K12/5/B	K12	K12/5	B	river pocket water	river pocket water	river	2008	9	12	10.01. Anacaena lutescens	sa	-	1	1	1	8.9	7.78	14.9	227	0.1	1.3	0.6	0.09	15.3	202	4.3	0.0265	2.44204	0.703921	0.173031	0.216288	33.1629	23.135	32.8601	8.55323	1.19549	1.83734	98.1627	1.24667	1.9903	59535.3	98.2945	1968.6	3.25022	182.17	9.25378	145.31	7.38139	1592.58
K12/5/B	K12	K12/5	B	river pocket water	river pocket water	river	2008	9	12	11.02. Limnebius parvulus	sb	-	2	2	1	8.9	7.78	14.9	227	0.1	1.3	0.6	0.09	15.3	202	4.3	0.0265	2.44204	0.703921	0.173031	0.216288	33.1629	23.135	32.8601	8.55323	1.19549	1.83734	98.1627	1.24667	1.9903	59535.3	98.2945	1968.6	3.25022	182.17	9.25378	145.31	7.38139	1592.58
K12/5/B	K12	K12/5	B	river pocket water	river pocket water	river	2008	9	12	11.03. Ochthebius minimus	sb	-	1	1	1	8.9	7.78	14.9	227	0.1	1.3	0.6	0.09	15.3	202	4.3	0.0265	2.44204	0.703921	0.173031	0.216288	33.1629	23.135	32.8601	8.55323	1.19549	1.83734	98.1627	1.24667	1.9903	59535.3	98.2945	1968.6	3.25022	182.17	9.25378	145.31	7.38139	1592.58
K12/5/B	K12	K12/5	B	river pocket water	river pocket water	river	2008	10	15	01.02. Gyrinus substriatus	sb	-	1	1	1	7.9	7.1	12.5	232	0.9	1.7	0.8	0.09	25.5	232	6.7	0.0175	3.26667	0.805111	0.170648	0.188151	35.8799	22.1055	32.8433	7.0841	0.923252	1.83734	98.1627	1.24667	1.86303	59535.3	98.2945	1968.6	3.25022	182.17	9.25378	145.31	7.38139	1592.58
K12/5/C	K12	K12/5	C	river pocket water	river pocket water	river	2008	8	5	10.01. Anacaena limbata	sb	-	1	1	1	9.6	7.1	16.2	244	0.9	2.3	0.4	0.09	13.5	107	6.2	0.0085	54.6512	0.824189	0.460012	0.445637	6.02808	8.42877	77.6559	5.23264	0.924817	1.69804	98.302	2.26667	0.69803	59535.3	98.2945	1968.6	3.25022	182.17	9.25378	145.31	7.38139	1592.58
K12/5/C	K12	K12/5	C	river pocket water	river pocket water	river	2008	8	5	11.02. Limnebius parvulus	sb	-	1	1	1	9.6	7.1	16.2	244	0.9	2.3	0.4	0.09	13.5	107	6.2	0.0085	54.6512	0.824189	0.460012	0.445637	6.02808	8.42877	77.6559	5.23264	0.924817	1.69804	98.302	2.26667	0.69803	59535.3	98.2945	1968.6	3.25022	182.17	9.25378	145.31	7.38139	1592.58
K12/5/C	K12	K12/5	C	river pocket water	river pocket water	river	2008	8	5	11.03. Ochthebius minimus	sb	-	1	1	1	9.6	7.1	16.2	244	0.9	2.3	0.4	0.09	13.5	107	6.2	0.0085	54.6512	0.824189	0.460012	0.445637	6.02808	8.42877	77.6559	5.23264	0.924817	1.69804	98.302	2.26667	0.69803	59535.3	98.2945	1968.6	3.25022	182.17	9.25378	145.31	7.38139	1592.58
K12/5/C	K12	K12/5	C	river pocket water	river pocket water	river	2008	9	12	01.02. Gyrinus substriatus	sb	-	1	1	1	8.9	7.78	14.9	227	0.1	1.3	0.6	0.09	15.3	202	4.3	0.0265	2.44204	0.703921	0.173031	0.216288	33.1629	23.135	32.8601	8.55323	1.19549	1.83734	98.1627	1.24667	1.9903	59535.3	98.2945	1968.6	3.25022	182.17	9.25378	145.31	7.38139	1592.58
K12/5/C	K12	K12/5	C	river pocket water	river pocket water	river	2008	9	12	10.01. Anacaena limbata	sb	-	1	1	1	8.9	7.78	14.9	227	0.1	1.3	0.6	0.09	15.3	202	4.3	0.0265	2.44204	0.703921	0.173031	0.216288	33.1629	23.135	32.8601	8.55323	1.19549	1.83734	98.1627	1.24667	1.9903	59535.3	98.2945	1968.6	3.25022	182.17	9.25378	145.31	7.38139	1592.58
K12/5/C	K12	K12/5	C	river pocket water	river pocket water	river	2008	10	15	11.01. Hydraena palustris	sa	-	2	2	1	7.9	7.1	12.5	232	0.9	1.7	0.8	0.09	25.5	232	6.7	0.0175	3.26667	0.805111	0.170648	0.188151	35.8799	22.1055	32.8433	7.0841	0.923252	1.83734	98.1627	1.24667	1.86303	59535.3	98.2945	1968.6	3.25022	182.17	9.25378	145.31	7.38139	1592.58
?	K9	K9/1	C	river pocket water	river pocket, Phalaris arundinacea	river	2008	7	19	05.07. Acilius sulcatus	sb	0	1	1	5	2.2	5.55	16.1	270	0.3	1.5	0.1	0.08	11.5	174	2.6	0.0031	100	0.108633	0.255607	0.396191	17.4708	5.00351	68.752	6.53716	1.47613	7.46919	92.5308	2.12667	1.20303	39624.8	65.4217	18461.4	30.4803	5740.96	31.0971	5532.02	29.9653	6152.93
?	K9	K9/1	A	river pocket water	river pocket, Phalaris arundinacea	river	2008	7	19	10.15. Cercyon bifenestratus	sb	0	1	1	5	2.2	5.55	16.1	270	0.3	1.5	0.1	0.08	11.5	174	2.6	0.0031	100	0.108633	0.255607	0.396191	17.4708	5.00351	68.752	6.53716	1.47613	7.46919	92.5308	2.12667	1.20303	39624.8	65.4217	18461.4	30.4803	5740.96	31.0971	5532.02	29.9653	6152.93
?	K9	K9/1	A	river pocket water	river pocket, Phalaris arundinacea	river	2008	7	19	11.03. Ochthebius minimus	sb	0	1	1	5	2.2	5.55	16.1	270	0.3	1.5	0.1	0.08	11.5	174	2.6	0.0031	100	0.108633	0.255607	0.396191	17.4708	5.00351	68.752	6.53716	1.47613	7.46919	92.5308	2.12667	1.20303	39624.8	65.4217	18461.4	30.4803	5740.96	31.0971	5532.02	29.9653	6152.93
?	K9	K9/1	A	river pocket water	river pocket, Phalaris arundinacea	river	2008	7	19	05.02. Ilybius fuliginosus	re	0	1	1	5	2.2	5.55	16.1	270	0.3	1.5	0.1	0.08	11.5	174	2.6	0.0031	100	0.108633	0.255607	0.396191	17.4708	5.00351	68.752	6.53716	1.47613	7.46919	92.5308	2.12667	1.20303	39624.8	65.4217	18461.4	30.4803	5740.96	31.0971	5532.02	29.9653	6152.93
?	K9	K9/1	A	river pocket water	river pocket, Phalaris arundinacea	river	2008	7	19	10.09. Hydrobius fuscipes	sb	0	1	1	5	2.2	5.55	16.1	270	0.3	1.5	0.1	0.08	11.5	174	2.6	0.0031	100	0.108633	0.255607	0.396191	17.4708	5.00351	68.752	6.53716	1.47613	7.46919	92.5308	2.12667	1.20303	39624.8	65.4217	18461.4	30.4803	5740.96	31.0971	5532.02	29.9653	6152.93
?	K9	K9/1	B	river pocket water	river pocket, Phalaris arundinacea	river	2008	7	19	11.01. Hydraena riparia	rb	0	1	1	5	2.2	5.55	16.1	270	0.3	1.5	0.1	0.08	11.5	174	2.6	0.0031	100	0.108633	0.255607	0.396191	17.4708	5.00351	68.752	6.53716	1.47613	7.46919	92.5308	2.12667	1.20303	39624.8	65.4217	18461.4	30.4803	5740.96	31.0971	5532.02	29.9653	6152.93
?	K9	K9/1	B	river pocket water	river pocket, Phalaris arundinacea	river	2008	7	19	05.05. Rhantus frontalis	sb	0	1	1	5	2.2	5.55	16.1	270	0.3	1.5	0.1	0.08	11.5	174	2.6	0.0031	100	0.108633	0.255607	0.396191	17.4708	5.00351	68.752	6.53716	1.47613	7.46919	92.5308	2.12667	1.20303	39624.8	65.4217	18461.4	30.4803	5740.96	31.0971	5532.02	29.9653	6152.93
?	K9	K9/1	B	river pocket water	river pocket, Phalaris arundinacea	river	2008	7	19	10.07. Enochrus coarctatus	sa	0	1	1	5	2.2	5.55	16.1	270	0.3	1.5	0.1	0.08	11.5	174	2.6	0.0031	100	0.108633	0.255607	0.396191	17.4708	5.00351	68.752	6.53716	1.47613	7.46919	92.5308	2.12667	1.20303	39624.8	65.4217	18461.4	30.4803	5740.96	31.0971	5532.02	29.9653	6152.93
K09/2/A	K9	K9/2	A	river pocket water	river pocket, Glyceria	river	2008	10	14	05.04. Colymbetes fuscus	sb	0	5	5	5	2.2	6.89	11.2	190.1	0.4	2.3	0.1	0	1.5	223	1.5	0.0031	100	72.0328	4.80514	3.76439	13.0868	1.28432	3.83082	0.819309	0.376439	28.5327	71.4673	-0.44	-0.0663636	39624.8	65.4217	18461.4	30.4803	5740.96	31.0971	5532.02	29.9653	6152.93
K09/2/A	K9	K9/2	A	river pocket water	river pocket, Glyceria	river	2008	10	14	05.16. Hydroporus palustris	sb	0	7	7	5	2.2	6.89	11.2	190.1	0.4	2.3	0.1	0	1.5	223	1.5	0.0031	100	72.0328	4.80514	3.76439	13.0868	1.28432	3.83082	0.819309	0.376439	28.5327	71.4673	-0.44	-0.0663636	39624.8	65.4217	18461.4	30.4803	5740.96	31.0971	5532.02	29.9653	6152.93
K09/2/A	K9	K9/2	A	river pocket water	river pocket, Glyceria	river	2008	10	14	05.15. Graptodytes pictus	sb	0	1	1	5	2.2	6.89	11.2	190.1	0.4	2.3	0.1	0	1.5	223	1.5	0.0031	100	72.0328	4.80514	3.76439	13.0868	1.28432	3.83082	0.819309	0.376439	28.5327	71.4673	-0.44	-0.0663636	39624.8	65.4217	18461.4	30.4803	5740.96	31.0971	5532.02	29.9653	6152.93
K09/2/A	K9	K9/2	A	river pocket water	river pocket, Glyceria	river	2008	10	14	10.01. Anacaena limbata	sb	0	1	1	5	2.2	6.89	11.2	190.1	0.4	2.3	0.1	0	1.5	223	1.5	0.0031	100	72.0328	4.80514	3.76439	13.0868	1.28432	3.83082	0.819309	0.376439	28.5327	71.4673	-0.44	-0.0663636	39624.8	65.4217	18461.4	30.4803	5740.96	31.0971	5532.02	29.9653	6152.93
K09/2/A	K9	K9/2	A	river pocket water	river pocket, Glyceria	river	2008	10	14	02.02. Haliplus ruficollis	sb	0	2	2	5	2.2	6.89	11.2	190.1	0.4	2.3	0.1	0	1.5	223	1.5	0.0031	100	72.0328	4.80514	3.76439	13.0868	1.28432	3.83082	0.819309	0.376439	28.5327	71.4673	-0.44	-0.0663636	39624.8	65.4217	18461.4	30.4803	5740.96	31.0971	5532.02	29.9653	6152.93
K09/2/A	K9	K9/2	A	river pocket water	river pocket, Glyceria	river	2008	10	14	06.01. Helophorus griseus	sa	0	1	1	5	2.2	6.89	11.2	190.1	0.4	2.3	0.1	0	1.5	223	1.5	0.0031	100	72.0328	4.80514	3.76439	13.0868	1.28432	3.83082	0.819309	0.376439	28.5327	71.4673	-0.44	-0.0663636	39624.8	65.4217	18461.4	30.4803	5740.96	31.0971	5532.02	29.9653	6152.93
K09/2/A	K9	K9/2	A	river pocket water	river pocket, Glyceria	river	2008	10	14	03.01. Noterus crassicornis	sb	0	1	1	5	2.2	6.89	11.2	190.1	0.4	2.3	0.1	0	1.5	223	1.5	0.0031	100	72.0328	4.80514	3.76439	13.0868	1.28432	3.83082	0.819309	0.376439	28.5327	71.4673	-0.44	-0.0663636	39624.8	65.4217	18461.4	30.4803	5740.96	31.0971	5532.02	29.9653	6152.93
K09/2/A	K9	K9/2	A	river pocket water	river pocket, Glyceria	river	2008	10	14	02.02. Haliplus flavicollis	re	0	2	2	5	2.2	6.89	11.2	190.1	0.4	2.3	0.1	0	1.5	223	1.5	0.0031	100	72.0328	4.80514	3.76439	13.0868	1.28432	3.83082	0.819309	0.376439	28.5327	71.4673	-0.44	-0.0663636	39624.8	65.4217	18461.4	30.4803	5740.96	31.0971	5532.02	29.9653	6152.93
K09/2/A	K9	K9/2	A	river pocket water	river pocket, Glyceria	river	2008	10	14	05.01. Agabus bipustulatus	sb	0	1	1	5	2.2	6.89	11.2	190.1	0.4	2.3	0.1	0	1.5	223	1.5	0.0031	100	72.0328	4.80514	3.76439	13.0868	1.28432	3.83082	0.819309	0.376439	28.5327	71.4673	-0.44	-0.0663636	39624.8	65.4217	18461.4	30.4803	5740.96	31.0971	5532.02	29.9653	6152.93
K09/2/A	K9	K9/2	A	river pocket water	river pocket, Glyceria	river	2008	10	14	05.27. Laccophilus hyalinus	re	0	2	2	5	2.2	6.89	11.2	190.1	0.4	2.3	0.1	0	1.5	223	1.5	0.0031	100	72.0328	4.80514	3.76439	13.0868	1.28432	3.83082	0.819309	0.376439	28.5327	71.4673	-0.44	-0.0663636	39624.8	65.4217	18461.4	30.4803	5740.96	31.0971	5532.02	29.9653	6152.93
K09/2/A	K9	K9/2	A	river pocket water	river pocket, Glyceria	river	2008	10	14	11.01. Hydraena riparia	rb	0	6	6	5	2.2	6.89	11.2	190.1	0.4	2.3	0.1	0	1.5	223	1.5	0.0031	100	72.0328	4.80514	3.76439	13.0868	1.28432	3.83082	0.819309	0.376439	28.5327	71.4673	-0.44	-0.0663636	39624.8	65.4217	18461.4	30.4803	5740.96	31.0971	5532.02	29.9653	6152.93
K09/2/A	K9	K9/2	A	river pocket water	river pocket, Glyceria	river	2008	10	14	02.02. Haliplus immaculatus	sb	0	1	1	5	2.2	6.89	11.2	190.1	0.4	2.3	0.1	0	1.5	223	1.5	0.0031	100	72.0328	4.80514	3.76439	13.0868	1.28432	3.83082	0.819309	0.376439	28.5327	71.4673	-0.44	-0.0663636	39624.8	65.4217	18461.4	30.4803	5740.96	31.0971	5532.02	29.9653	6152.93
K14/8/C	K14	K14/8	C	river current	river current, gravel	river	2008	9	13	11.01. Hydraena riparia	rb		18	18	2	9.8	7.4	14.1	263	0.2	2.8	0.2	0	30	209	4.5	0.6634	57.3248	0.781132	0.211662	0.395606	39.0238	41.1682	17.7569	0.448521	0.214181	0.283399	99.7166	0.58	1.22864	60568.3	100	478.1	0.789357	37.72	7.88956	50.86	10.6379	361.2
K14/8/C	K14	K14/8	C	river current	river current, gravel	river	2008	9	13	12.05. Oulimnius tuberculatus	rb		6	6	2	9.8	7.4	14.1	263	0.2	2.8	0.2	0	30	209	4.5	0.6634	57.3248	0.781132	0.211662	0.395606	39.0238	41.1682	17.7569	0.448521	0.214181	0.283399	99.7166	0.58	1.22864	60568.3	100	478.1	0.789357	37.72	7.88956	50.86	10.6379	361.2
K14/8/C	K14	K14/8	C	river current	river current, gravel	river	2008	9	13	12.02. Elmis maugetii	rb		3	3	2	9.8	7.4	14.1	263	0.2	2.8	0.2	0	30	209	4.5	0.6634	57.3248	0.781132	0.211662	0.395606	39.0238	41.1682	17.7569	0.448521	0.214181	0.283399	99.7166	0.58	1.22864	60568.3	100	478.1	0.789357	37.72	7.88956	50.86	10.6379	361.2
K12/5	K12	K12/5	A	river pocket water	river pocket water	river	2008	10	12	05.10. Dytiscus dimidiatus	sb		1	1	1	7.9	7.1	12.5	232	0.9	1.7	0.8	0.09	25.5	232	6.7	0.0175	3.26667	0.805111	0.170648	0.188151	35.8799	22.1055	32.8433	7.0841	0.923252	1.83734	98.1627	1.24667	1.86303	59535.3	98.2945	1968.6	3.25022	182.17	9.25378	145.31	7.38139	1592.58
K12/5	K12	K12/5	C	river pocket water	river pocket water	river	2008	9	12	05.10. Dytiscus dimidiatus	sb		1	1	1	8.9	7.78	14.9	227	0.1	1.3	0.6	0.09	15.3	202	4.3	0.0265	2.44204	0.703921	0.173031	0.216288	33.1629	23.135	32.8601	8.55323	1.19549	1.83734	98.1627	1.24667	1.9903	59535.3	98.2945	1968.6	3.25022	182.17	9.25378	145.31	7.38139	1592.58
K12/5	K12	K12/5	C	river pocket water	river pocket water	river	2008	9	12	02.02. Haliplus ruficollis	sb		1	1	1	8.9	7.78	14.9	227	0.1	1.3	0.6	0.09	15.3	202	4.3	0.0265	2.44204	0.703921	0.173031	0.216288	33.1629	23.135	32.8601	8.55323	1.19549	1.83734	98.1627	1.24667	1.9903	59535.3	98.2945	1968.6	3.25022	182.17	9.25378	145.31	7.38139	1592.58
K09/7/B	K9	K9/3	B	river current	river current, plants, Potamogeton crispus	river	2008	7	9	06.01. Helophorus griseus	sa		1	1	5	2.2	5.55	16.1	270	0.3	1.5	0.1	0.08	11.5	174	2.6	0.0031	100	0.108633	0.255607	0.396191	17.4708	5.00351	68.752	6.53716	1.47613	7.46919	92.5308	2.12667	1.20303	39624.8	65.4217	18461.4	30.4803	5740.96	31.0971	5532.02	29.9653	6152.93
K14/8/C	K14	K14/8	B	river current	river current, gravel	river	2008	7	10	11.01. Hydraena riparia	rb		1	1	2	10.9	7.02	17.9	158	0.4	7.8	0.7	0.5	49.3	162	5.8	0.3358	100	0.91013	0.290418	0.372742	38.3924	43.3272	15.8838	0.560256	0.262977	1.04886	98.9511	0.58	1.46803	60568.3	100	478.1	0.789357	37.72	7.88956	50.86	10.6379	361.2
K01/8/B	K1	K1/8	B	river current	river current, stones	river	2008	10	13	11.01. Hydraena palustris	sa		1	1	0
K01/8/B	K1	K1/8	B	river current	river current, stones	river	2008	10	13	14.02. Elodes sp.	re	15		15	0
K01/6/B	K1	K1/6	B	river pocket water	river pocket water	river	2008	9	10	05.02. Ilybius fuliginosus	re		5	5	3	1.5	6.18	18.2	156.6	0.4	1.8	0.3	0.13	1.5	91	1.2	0.0037	100	4.6174	2.26292	2.43296	29.3133	5.54611	40.1046	11.6808	4.04186	6.39609	93.6039	1.24667	2.09333	469.4	0.774993	469.4	0.774993	192.52	41.0141	112.95	24.0626	111.54
K01/6/B	K1	K1/6	B	river pocket water	river pocket water	river	2008	9	10	05.01. Agabus bipustulatus	sb		6	6	3	1.5	6.18	18.2	156.6	0.4	1.8	0.3	0.13	1.5	91	1.2	0.0037	100	4.6174	2.26292	2.43296	29.3133	5.54611	40.1046	11.6808	4.04186	6.39609	93.6039	1.24667	2.09333	469.4	0.774993	469.4	0.774993	192.52	41.0141	112.95	24.0626	111.54
K01/6/B	K1	K1/6	B	river pocket water	river pocket water	river	2008	9	10	10.01. Anacaena globulus	sb		1	1	3	1.5	6.18	18.2	156.6	0.4	1.8	0.3	0.13	1.5	91	1.2	0.0037	100	4.6174	2.26292	2.43296	29.3133	5.54611	40.1046	11.6808	4.04186	6.39609	93.6039	1.24667	2.09333	469.4	0.774993	469.4	0.774993	192.52	41.0141	112.95	24.0626	111.54
K01/6/B	K1	K1/6	B	river pocket water	river pocket water	river	2008	9	10	10.01. Anacaena limbata	sb		2	2	3	1.5	6.18	18.2	156.6	0.4	1.8	0.3	0.13	1.5	91	1.2	0.0037	100	4.6174	2.26292	2.43296	29.3133	5.54611	40.1046	11.6808	4.04186	6.39609	93.6039	1.24667	2.09333	469.4	0.774993	469.4	0.774993	192.52	41.0141	112.95	24.0626	111.54
K01/6/B	K1	K1/6	B	river pocket water	river pocket water	river	2008	9	10	05.01. Agabus sp.	sb		1	1	3	1.5	6.18	18.2	156.6	0.4	1.8	0.3	0.13	1.5	91	1.2	0.0037	100	4.6174	2.26292	2.43296	29.3133	5.54611	40.1046	11.6808	4.04186	6.39609	93.6039	1.24667	2.09333	469.4	0.774993	469.4	0.774993	192.52	41.0141	112.95	24.0626	111.54
K01/1/C	K1	K1/1	C	river current	limnocrene	river	2008	6	2	05.01. Agabus bipustulatus	sb		1	1	2	8.1	7.08	19.4	154	1.3	0.6	0.1	0.01	6.88	133	3.2	0.0015	100	1.1842	0.87631	1.36775	37.409	7.82758	42.9096	7.31245	1.11315	8.9727	91.0273	1.24667	1.86303	469.4	0.774993	469.4	0.774993	192.52	41.0141	112.95	24.0626	111.54
K01/5/C	K1	K1/5	C	river current	river current, sand, meadow	river	2008	10	15	14.02. Elodes sp.	re	2		2	0	2.3	7.01	10.1	148.2	0.5	1.9	0.2	0	25	178	3.2	0.3579	109.444	2.30769	1.19155	1.16139	36.3499	8.71795	42.4887	5.23379	2.54902	9.68015	90.3199	1.24667	1.86303	469.4	0.774993	469.4	0.774993	192.52	41.0141	112.95	24.0626	111.54
K01/5/C	K1	K1/5	C	river current	river current, sand, meadow	river	2008	10	15	05.01. Agabus sp.	sb	2		2	0	2.3	7.01	10.1	148.2	0.5	1.9	0.2	0	25	178	3.2	0.3579	109.444	2.30769	1.19155	1.16139	36.3499	8.71795	42.4887	5.23379	2.54902	9.68015	90.3199	1.24667	1.86303	469.4	0.774993	469.4	0.774993	192.52	41.0141	112.95	24.0626	111.54
K01/5/C	K1	K1/5	C	river current	river current, sand, meadow	river	2008	10	15	11.01. Hydraena palustris	sa		1	1	0	2.3	7.01	10.1	148.2	0.5	1.9	0.2	0	25	178	3.2	0.3579	109.444	2.30769	1.19155	1.16139	36.3499	8.71795	42.4887	5.23379	2.54902	9.68015	90.3199	1.24667	1.86303	469.4	0.774993	469.4	0.774993	192.52	41.0141	112.95	24.0626	111.54
K01/5/C	K1	K1/5	C	river current	river current, sand, meadow	river	2008	10	15	10.13. Laccobius minutus	sa		1	1	0	2.3	7.01	10.1	148.2	0.5	1.9	0.2	0	25	178	3.2	0.3579	109.444	2.30769	1.19155	1.16139	36.3499	8.71795	42.4887	5.23379	2.54902	9.68015	90.3199	1.24667	1.86303	469.4	0.774993	469.4	0.774993	192.52	41.0141	112.95	24.0626	111.54
K01/9/C	K1	K1/9	C	river pocket water	river pocket, wetlands	river	2008	10	13	05.01. Agabus chalconatus	sb		1	1	0	5.9	7.13	10.1	147.3	0.3	2.1	0.6	0	3.7	103	4.3	0.0081	6.66667	20.7781	4.63851	3.43467	28.8104	8.95736	29.0893	2.23764	2.054	6.06599	93.934	1.54667	1.33303	469.4	0.774993	469.4	0.774993	192.52	41.0141	112.95	24.0626	111.54
K01/9/C	K1	K1/9	C	river pocket water	river pocket, wetlands	river	2008	10	13	14.02. Elodes sp.	re	5		5	0	5.9	7.13	10.1	147.3	0.3	2.1	0.6	0	3.7	103	4.3	0.0081	6.66667	20.7781	4.63851	3.43467	28.8104	8.95736	29.0893	2.23764	2.054	6.06599	93.934	1.54667	1.33303	469.4	0.774993	469.4	0.774993	192.52	41.0141	112.95	24.0626	111.54
K01/9/C	K1	K1/9	C	river pocket water	river pocket, wetlands	river	2008	10	13	10.01. Anacaena limbata	sb		3	3	0	5.9	7.13	10.1	147.3	0.3	2.1	0.6	0	3.7	103	4.3	0.0081	6.66667	20.7781	4.63851	3.43467	28.8104	8.95736	29.0893	2.23764	2.054	6.06599	93.934	1.54667	1.33303	469.4	0.774993	469.4	0.774993	192.52	41.0141	112.95	24.0626	111.54
K01/9/C	K1	K1/9	C	river pocket water	river pocket, wetlands	river	2008	10	13	05.01. Agabus sp.	sb	1		1	0	5.9	7.13	10.1	147.3	0.3	2.1	0.6	0	3.7	103	4.3	0.0081	6.66667	20.7781	4.63851	3.43467	28.8104	8.95736	29.0893	2.23764	2.054	6.06599	93.934	1.54667	1.33303	469.4	0.774993	469.4	0.774993	192.52	41.0141	112.95	24.0626	111.54
K01/9/C	K1	K1/9	C	river pocket water	river pocket, wetlands	river	2008	10	13	05.16. Hydroporus palustris	sb			0	0	5.9	7.13	10.1	147.3	0.3	2.1	0.6	0	3.7	103	4.3	0.0081	6.66667	20.7781	4.63851	3.43467	28.8104	8.95736	29.0893	2.23764	2.054	6.06599	93.934	1.54667	1.33303	469.4	0.774993	469.4	0.774993	192.52	41.0141	112.95	24.0626	111.54
K01/9/C	K1	K1/9	C	river pocket water	river pocket, wetlands	river	2008	10	13	11.01. Hydraena riparia	rb		3	3	0	5.9	7.13	10.1	147.3	0.3	2.1	0.6	0	3.7	103	4.3	0.0081	6.66667	20.7781	4.63851	3.43467	28.8104	8.95736	29.0893	2.23764	2.054	6.06599	93.934	1.54667	1.33303	469.4	0.774993	469.4	0.774993	192.52	41.0141	112.95	24.0626	111.54
K01/9/C	K1	K1/9	C	river pocket water	river pocket, wetlands	river	2008	10	13	05.02. Ilybius fuliginosus	re		1	1	0	5.9	7.13	10.1	147.3	0.3	2.1	0.6	0	3.7	103	4.3	0.0081	6.66667	20.7781	4.63851	3.43467	28.8104	8.95736	29.0893	2.23764	2.054	6.06599	93.934	1.54667	1.33303	469.4	0.774993	469.4	0.774993	192.52	41.0141	112.95	24.0626	111.54
K01/9/C	K1	K1/9	C	river pocket water	river pocket, wetlands	river	2008	10	13	05.01. Agabus bipustulatus	sb		1	1	0	5.9	7.13	10.1	147.3	0.3	2.1	0.6	0	3.7	103	4.3	0.0081	6.66667	20.7781	4.63851	3.43467	28.8104	8.95736	29.0893	2.23764	2.054	6.06599	93.934	1.54667	1.33303	469.4	0.774993	469.4	0.774993	192.52	41.0141	112.95	24.0626	111.54
K01/9/C	K1	K1/9	C	river pocket water	river pocket, wetlands	river	2008	10	13	14.02. Elodes sp.	re	1		1	0	5.9	7.13	10.1	147.3	0.3	2.1	0.6	0	3.7	103	4.3	0.0081	6.66667	20.7781	4.63851	3.43467	28.8104	8.95736	29.0893	2.23764	2.054	6.06599	93.934	1.54667	1.33303	469.4	0.774993	469.4	0.774993	192.52	41.0141	112.95	24.0626	111.54
K01/9/C	K1	K1/9	C	river pocket water	river pocket, wetlands	river	2008	10	13	05.01. Agabus sp.	sb	3		3	0	5.9	7.13	10.1	147.3	0.3	2.1	0.6	0	3.7	103	4.3	0.0081	6.66667	20.7781	4.63851	3.43467	28.8104	8.95736	29.0893	2.23764	2.054	6.06599	93.934	1.54667	1.33303	469.4	0.774993	469.4	0.774993	192.52	41.0141	112.95	24.0626	111.54
K01/9/B	K1	K1/9	B	river pocket water	river, river pocket	river	2008	6	2	05.01. Agabus bipustulatus	sb		2	2	0	9.2	6.85	18.7	154	0.5	0.4	0.1	0.01	14.48	213	4.2	0.027	8.45	20.7781	4.63851	3.43467	28.8104	8.95736	29.0893	2.23764	2.054	3.84203	96.158	1.54667	1.33303	469.4	0.774993	469.4	0.774993	192.52	41.0141	112.95	24.0626	111.54
K01/5/B	K1	K1/5	B	river current	river current, sand, meadow	river	2008	10	13	05.01. Agabus sp.	sb	7		7	0	2.3	7.01	10.1	148.2	0.5	1.9	0.2	0	25	178	3.2	0.3579	109.444	2.30769	1.19155	1.16139	36.3499	8.71795	42.4887	5.23379	2.54902	9.68015	90.3199	1.24667	1.86303	469.4	0.774993	469.4	0.774993	192.52	41.0141	112.95	24.0626	111.54
K01/5/B	K1	K1/5	B	river current	river current, sand, meadow	river	2008	10	13	14.02. Elodes sp.	re	8		8	0	2.3	7.01	10.1	148.2	0.5	1.9	0.2	0	25	178	3.2	0.3579	109.444	2.30769	1.19155	1.16139	36.3499	8.71795	42.4887	5.23379	2.54902	9.68015	90.3199	1.24667	1.86303	469.4	0.774993	469.4	0.774993	192.52	41.0141	112.95	24.0626	111.54
K01/5/B	K1	K1/5	B	river current	river current, sand, meadow	river	2008	10	13	10.13. Laccobius minutus	sa		3	3	0	2.3	7.01	10.1	148.2	0.5	1.9	0.2	0	25	178	3.2	0.3579	109.444	2.30769	1.19155	1.16139	36.3499	8.71795	42.4887	5.23379	2.54902	9.68015	90.3199	1.24667	1.86303	469.4	0.774993	469.4	0.774993	192.52	41.0141	112.95	24.0626	111.54
K01/5/B	K1	K1/5	B	river current	river current, sand, meadow	river	2008	10	13	05.24. Hygrotus decoratus	sa		1	1	0	2.3	7.01	10.1	148.2	0.5	1.9	0.2	0	25	178	3.2	0.3579	109.444	2.30769	1.19155	1.16139	36.3499	8.71795	42.4887	5.23379	2.54902	9.68015	90.3199	1.24667	1.86303	469.4	0.774993	469.4	0.774993	192.52	41.0141	112.95	24.0626	111.54
K01/8/A	K1	K1/8	A	river current	river current, stones, wetlands	river	2008	5	6	05.01. Agabus sp.	sb	2		2	0	4.2	7.6	16.1	123	2.7	0.4	0.1	0.01	6.8	69	4.7	0.2278	25.5814	2.66971	0.987574	1.13951	24.0002	8.26415	52.3034	7.21689	3.41853	10.8186	89.1814	1.24667	1.9903	469.4	0.774993	469.4	0.774993	192.52	41.0141	112.95	24.0626	111.54
K01/9/A	K1	K1/9	A	river pocket water	river pocket water	river	2008	5	6	05.01. Agabus sp.	sb	1		1	0	4.2	7.6	16.1	123	2.7	0.4	0.1	0.01	6.8	69	4.7	0.0089	25.5814	20.7781	4.63851	3.43467	28.8104	8.95736	29.0893	2.23764	2.054	9.88161	90.1184	1.54667	1.33303	469.4	0.774993	469.4	0.774993	192.52	41.0141	112.95	24.0626	111.54
K01/8/A	K1	K1/8	A	river current	river current, stones, wetlands	river	2008	9	10	14.02. Elodes sp.	re	10		10	0	1.5	6.18	18.2	156.6	0.2	1.4	0.3	0.08	100	61	3.1	0.1655	4.73773	2.66971	0.987574	1.13951	24.0002	8.26415	52.3034	7.21689	3.41853	9.7617	90.2383	1.24667	1.9903	469.4	0.774993	469.4	0.774993	192.52	41.0141	112.95	24.0626	111.54
K01/9/B	K1	K1/9	B	river pocket water	river pocket, wetlands	river	2008	10	13	14.02. Elodes sp.	re	11		11	0	5.9	7.13	10.1	147.3	0.3	2.1	0.6	0	3.7	103	4.3	0.0081	6.66667	20.7781	4.63851	3.43467	28.8104	8.95736	29.0893	2.23764	2.054	6.06599	93.934	1.54667	1.33303	469.4	0.774993	469.4	0.774993	192.52	41.0141	112.95	24.0626	111.54
K01/9/B	K1	K1/9	B	river pocket water	river pocket, wetlands	river	2008	10	13	10.01. Anacaena lutescens	sa		1	1	0	5.9	7.13	10.1	147.3	0.3	2.1	0.6	0	3.7	103	4.3	0.0081	6.66667	20.7781	4.63851	3.43467	28.8104	8.95736	29.0893	2.23764	2.054	6.06599	93.934	1.54667	1.33303	469.4	0.774993	469.4	0.774993	192.52	41.0141	112.95	24.0626	111.54
K01/9/B	K1	K1/9	B	river pocket water	river pocket, wetlands	river	2008	10	13	11.01. Limnebius parvulus	sb		1	1	0	5.9	7.13	10.1	147.3	0.3	2.1	0.6	0	3.7	103	4.3	0.0081	6.66667	20.7781	4.63851	3.43467	28.8104	8.95736	29.0893	2.23764	2.054	6.06599	93.934	1.54667	1.33303	469.4	0.774993	469.4	0.774993	192.52	41.0141	112.95	24.0626	111.54
K01/8/C	K1	K1/8	C	river current	river current, stones	river	2008	10	13	14.02. Elodes sp.	re	21		21	0	5.9	7.13	10.1	147.3	0.3	2.1	0.6	0	3.7	103	4.3	0.2195	6.66667	2.66971	0.987574	1.13951	24.0002	8.26415	52.3034	7.21689	3.41853	8.85221	91.1478	1.24667	1.9903	469.4	0.774993	469.4	0.774993	192.52	41.0141	112.95	24.0626	111.54
K01/8/C	K1	K1/8	C	river current	river current, stones	river	2008	10	13	11.01. Hydraena riparia	rb		2	2	0	5.9	7.13	10.1	147.3	0.3	2.1	0.6	0	3.7	103	4.3	0.2195	6.66667	2.66971	0.987574	1.13951	24.0002	8.26415	52.3034	7.21689	3.41853	8.85221	91.1478	1.24667	1.9903	469.4	0.774993	469.4	0.774993	192.52	41.0141	112.95	24.0626	111.54
K01/8/C	K1	K1/8	C	river current	river current, stones	river	2008	10	13	05.01. Agabus sp.	sb	1		1	0	5.9	7.13	10.1	147.3	0.3	2.1	0.6	0	3.7	103	4.3	0.2195	6.66667	2.66971	0.987574	1.13951	24.0002	8.26415	52.3034	7.21689	3.41853	8.85221	91.1478	1.24667	1.9903	469.4	0.774993	469.4	0.774993	192.52	41.0141	112.95	24.0626	111.54
K01/6/B	K1	K1/6	B	river pocket water	river pocket water	river	2008	9	10	05.02. Ilybius fuliginosus	re		1	1	3	1.5	6.18	18.2	156.6	0.4	1.8	0.3	0.13	1.5	91	1.2	0.0037	100	4.6174	2.26292	2.43296	29.3133	5.54611	40.1046	11.6808	4.04186	6.39609	93.6039	1.24667	2.09333	469.4	0.774993	469.4	0.774993	192.52	41.0141	112.95	24.0626	111.54
K01/6/B	K1	K1/6	B	river pocket water	river pocket water	river	2008	9	10	10.13. Laccobius minutus	sa		3	3	3	1.5	6.18	18.2	156.6	0.4	1.8	0.3	0.13	1.5	91	1.2	0.0037	100	4.6174	2.26292	2.43296	29.3133	5.54611	40.1046	11.6808	4.04186	6.39609	93.6039	1.24667	2.09333	469.4	0.774993	469.4	0.774993	192.52	41.0141	112.95	24.0626	111.54
K01/6/B	K1	K1/6	B	river pocket water	river pocket water	river	2008	9	10	05.01. Agabus sp.	sb	1		1	3	1.5	6.18	18.2	156.6	0.4	1.8	0.3	0.13	1.5	91	1.2	0.0037	100	4.6174	2.26292	2.43296	29.3133	5.54611	40.1046	11.6808	4.04186	6.39609	93.6039	1.24667	2.09333	469.4	0.774993	469.4	0.774993	192.52	41.0141	112.95	24.0626	111.54
K01/8/A	K1	K1/8	A	river current	river current, stones, wetlands	river	2008	9	10	14.02. Elodes sp.	re	9		9	0	1.5	6.18	18.2	156.6	0.2	1.4	0.3	0.08	100	61	3.1	0.1655	4.73773	2.66971	0.987574	1.13951	24.0002	8.26415	52.3034	7.21689	3.41853	9.7617	90.2383	1.24667	1.9903	469.4	0.774993	469.4	0.774993	192.52	41.0141	112.95	24.0626	111.54
K01/6/B	K1	K1/6	B	river pocket water	river pocket, meadow	river	2008	6	2	03.01. Noterus crassicornis	sb		1	1	3	8.9	6.5	20.4	154	0.8	1.6	0.2	0.12	29	219	2.7	0.044	100	4.6174	2.26292	2.43296	29.3133	5.54611	40.1046	11.6808	4.04186	4.31185	95.6881	1.24667	2.09333	469.4	0.774993	469.4	0.774993	192.52	41.0141	112.95	24.0626	111.54
K01/8/A	K1	K1/8	A	river current	river current, stones	river	2008	10	13	14.02. Elodes sp.	re	9		9	0	5.9	7.13	10.1	147.3	0.3	2.1	0.6	0	3.7	103	4.3	0.2195	6.66667	2.66971	0.987574	1.13951	24.0002	8.26415	52.3034	7.21689	3.41853	8.85221	91.1478	1.24667	1.9903	469.4	0.774993	469.4	0.774993	192.52	41.0141	112.95	24.0626	111.54
K01/8/A	K1	K1/8	A	river current	river current, stones	river	2008	10	13	11.01. Hydraena riparia	rb		1	1	0	5.9	7.13	10.1	147.3	0.3	2.1	0.6	0	3.7	103	4.3	0.2195	6.66667	2.66971	0.987574	1.13951	24.0002	8.26415	52.3034	7.21689	3.41853	8.85221	91.1478	1.24667	1.9903	469.4	0.774993	469.4	0.774993	192.52	41.0141	112.95	24.0626	111.54
K01/6/A	K1	K1/6	A	river pocket water	river pocket water	river	2008	8	5	05.09. Cybister laterimarginalis	sb		1	1	3	9.4	7.03	17.1	159.3	1.2	2.4	0.9	0.13	9.1	178	1.5	0.0026	100	4.6174	2.26292	2.43296	29.3133	5.54611	40.1046	11.6808	4.04186	9.85053	90.1495	1.24667	2.09333	469.4	0.774993	469.4	0.774993	192.52	41.0141	112.95	24.0626	111.54
K01/6/A	K1	K1/6	A	river pocket water	river pocket water	river	2008	8	5	05.02. Ilybius fuliginosus	re		7	7	3	9.4	7.03	17.1	159.3	1.2	2.4	0.9	0.13	9.1	178	1.5	0.0026	100	4.6174	2.26292	2.43296	29.3133	5.54611	40.1046	11.6808	4.04186	9.85053	90.1495	1.24667	2.09333	469.4	0.774993	469.4	0.774993	192.52	41.0141	112.95	24.0626	111.54
K01/6/A	K1	K1/6	A	river pocket water	river pocket water	river	2008	8	5	05.01. Agabus bipustulatus	sb		29	29	3	9.4	7.03	17.1	159.3	1.2	2.4	0.9	0.13	9.1	178	1.5	0.0026	100	4.6174	2.26292	2.43296	29.3133	5.54611	40.1046	11.6808	4.04186	9.85053	90.1495	1.24667	2.09333	469.4	0.774993	469.4	0.774993	192.52	41.0141	112.95	24.0626	111.54
K01/6/A	K1	K1/6	A	river pocket water	river pocket water	river	2008	8	5	11.01. Hydraena palustris	sa		1	1	3	9.4	7.03	17.1	159.3	1.2	2.4	0.9	0.13	9.1	178	1.5	0.0026	100	4.6174	2.26292	2.43296	29.3133	5.54611	40.1046	11.6808	4.04186	9.85053	90.1495	1.24667	2.09333	469.4	0.774993	469.4	0.774993	192.52	41.0141	112.95	24.0626	111.54
K01/6/A	K1	K1/6	A	river pocket water	river pocket water	river	2008	8	5	08.01. Hydrochus elongatus	sb		2	2	3	9.4	7.03	17.1	159.3	1.2	2.4	0.9	0.13	9.1	178	1.5	0.0026	100	4.6174	2.26292	2.43296	29.3133	5.54611	40.1046	11.6808	4.04186	9.85053	90.1495	1.24667	2.09333	469.4	0.774993	469.4	0.774993	192.52	41.0141	112.95	24.0626	111.54
K01/6/A	K1	K1/6	A	river pocket water	river pocket water	river	2008	8	5	05.27. Laccophilus minutus	sb		1	1	3	9.4	7.03	17.1	159.3	1.2	2.4	0.9	0.13	9.1	178	1.5	0.0026	100	4.6174	2.26292	2.43296	29.3133	5.54611	40.1046	11.6808	4.04186	9.85053	90.1495	1.24667	2.09333	469.4	0.774993	469.4	0.774993	192.52	41.0141	112.95	24.0626	111.54
K01/6/A	K1	K1/6	A	river pocket water	river pocket water	river	2008	8	5	05.24. Hygrotus inaequalis	sb		1	1	3	9.4	7.03	17.1	159.3	1.2	2.4	0.9	0.13	9.1	178	1.5	0.0026	100	4.6174	2.26292	2.43296	29.3133	5.54611	40.1046	11.6808	4.04186	9.85053	90.1495	1.24667	2.09333	469.4	0.774993	469.4	0.774993	192.52	41.0141	112.95	24.0626	111.54
K01/6/A	K1	K1/6	A	river pocket water	river pocket water	river	2008	8	5	05.16. Hydroporus incognitus	sa		1	1	3	9.4	7.03	17.1	159.3	1.2	2.4	0.9	0.13	9.1	178	1.5	0.0026	100	4.6174	2.26292	2.43296	29.3133	5.54611	40.1046	11.6808	4.04186	9.85053	90.1495	1.24667	2.09333	469.4	0.774993	469.4	0.774993	192.52	41.0141	112.95	24.0626	111.54
K01/6/A	K1	K1/6	A	river pocket water	river pocket water	river	2008	8	5	01.02. Gyrinus substriatus	sb		1	1	3	9.4	7.03	17.1	159.3	1.2	2.4	0.9	0.13	9.1	178	1.5	0.0026	100	4.6174	2.26292	2.43296	29.3133	5.54611	40.1046	11.6808	4.04186	9.85053	90.1495	1.24667	2.09333	469.4	0.774993	469.4	0.774993	192.52	41.0141	112.95	24.0626	111.54
K01/6/A	K1	K1/6	A	river pocket water	river pocket water	river	2008	8	5	05.01. Agabus sturmii	sb		2	2	3	9.4	7.03	17.1	159.3	1.2	2.4	0.9	0.13	9.1	178	1.5	0.0026	100	4.6174	2.26292	2.43296	29.3133	5.54611	40.1046	11.6808	4.04186	9.85053	90.1495	1.24667	2.09333	469.4	0.774993	469.4	0.774993	192.52	41.0141	112.95	24.0626	111.54
K01/1/A	K1	K1/1	A	river current	limnocrene	river	2008	5	6	05.27. Laccophilus minutus	sb		1	1	1	6	7.9	16.7	123	1.3	0.4	0.1	0.04	6	80	4.4	0.0009	100	1.1842	0.87631	1.36775	37.409	7.82758	42.9096	7.31245	1.11315	6.04905	93.951	1.24667	1.9903	469.4	0.774993	469.4	0.774993	192.52	41.0141	112.95	24.0626	111.54
K01/1/A	K1	K1/1	A	river current	limnocrene	river	2008	5	6	05.01. Agabus undulatus	sb		1	1	1	6	7.9	16.7	123	1.3	0.4	0.1	0.04	6	80	4.4	0.0009	100	1.1842	0.87631	1.36775	37.409	7.82758	42.9096	7.31245	1.11315	6.04905	93.951	1.24667	1.9903	469.4	0.774993	469.4	0.774993	192.52	41.0141	112.95	24.0626	111.54
K01/1/A	K1	K1/1	A	river current	limnocrene	river	2008	5	6	05.10. Dytiscus marginalis	sb	1		1	1	6	7.9	16.7	123	1.3	0.4	0.1	0.04	6	80	4.4	0.0009	100	1.1842	0.87631	1.36775	37.409	7.82758	42.9096	7.31245	1.11315	6.04905	93.951	1.24667	1.9903	469.4	0.774993	469.4	0.774993	192.52	41.0141	112.95	24.0626	111.54
K01/1/A	K1	K1/1	A	river current	limnocrene	river	2008	5	6	05.04. Colymbetes striatus	sa	1		1	1	6	7.9	16.7	123	1.3	0.4	0.1	0.04	6	80	4.4	0.0009	100	1.1842	0.87631	1.36775	37.409	7.82758	42.9096	7.31245	1.11315	6.04905	93.951	1.24667	1.9903	469.4	0.774993	469.4	0.774993	192.52	41.0141	112.95	24.0626	111.54
K01/6/C	K1	K1/6	C	river pocket water	river pocket water	river	2008	8	5	05.01. Agabus bipustulatus	sb		28	28	3	9.4	7.03	17.1	159.3	1.2	2.4	0.9	0.13	9.1	178	1.5	0.0026	100	4.6174	2.26292	2.43296	29.3133	5.54611	40.1046	11.6808	4.04186	9.85053	90.1495	1.24667	2.09333	469.4	0.774993	469.4	0.774993	192.52	41.0141	112.95	24.0626	111.54
K01/6/C	K1	K1/6	C	river pocket water	river pocket water	river	2008	8	5	05.02. Ilybius fuliginosus	re		12	12	3	9.4	7.03	17.1	159.3	1.2	2.4	0.9	0.13	9.1	178	1.5	0.0026	100	4.6174	2.26292	2.43296	29.3133	5.54611	40.1046	11.6808	4.04186	9.85053	90.1495	1.24667	2.09333	469.4	0.774993	469.4	0.774993	192.52	41.0141	112.95	24.0626	111.54
K01/6/C	K1	K1/6	C	river pocket water	river pocket water	river	2008	8	5	10.09. Hydrobius fuscipes	sb		1	1	3	9.4	7.03	17.1	159.3	1.2	2.4	0.9	0.13	9.1	178	1.5	0.0026	100	4.6174	2.26292	2.43296	29.3133	5.54611	40.1046	11.6808	4.04186	9.85053	90.1495	1.24667	2.09333	469.4	0.774993	469.4	0.774993	192.52	41.0141	112.95	24.0626	111.54
K01/6/C	K1	K1/6	C	river pocket water	river pocket water	river	2008	8	5	05.01. Agabus sturmii	sb		1	1	3	9.4	7.03	17.1	159.3	1.2	2.4	0.9	0.13	9.1	178	1.5	0.0026	100	4.6174	2.26292	2.43296	29.3133	5.54611	40.1046	11.6808	4.04186	9.85053	90.1495	1.24667	2.09333	469.4	0.774993	469.4	0.774993	192.52	41.0141	112.95	24.0626	111.54
K01/6/C	K1	K1/6	C	river pocket water	river pocket water	river	2008	8	5	05.27. Laccophilus minutus	sb		1	1	3	9.4	7.03	17.1	159.3	1.2	2.4	0.9	0.13	9.1	178	1.5	0.0026	100	4.6174	2.26292	2.43296	29.3133	5.54611	40.1046	11.6808	4.04186	9.85053	90.1495	1.24667	2.09333	469.4	0.774993	469.4	0.774993	192.52	41.0141	112.95	24.0626	111.54
K01/6/C	K1	K1/6	C	river pocket water	river pocket water	river	2008	8	5	06.01. Helophorus griseus	sa		1	1	3	9.4	7.03	17.1	159.3	1.2	2.4	0.9	0.13	9.1	178	1.5	0.0026	100	4.6174	2.26292	2.43296	29.3133	5.54611	40.1046	11.6808	4.04186	9.85053	90.1495	1.24667	2.09333	469.4	0.774993	469.4	0.774993	192.52	41.0141	112.95	24.0626	111.54
K01/6/C	K1	K1/6	C	river pocket water	river pocket water	river	2008	8	5	08.01. Hydrochus elongatus	sb		1	1	3	9.4	7.03	17.1	159.3	1.2	2.4	0.9	0.13	9.1	178	1.5	0.0026	100	4.6174	2.26292	2.43296	29.3133	5.54611	40.1046	11.6808	4.04186	9.85053	90.1495	1.24667	2.09333	469.4	0.774993	469.4	0.774993	192.52	41.0141	112.95	24.0626	111.54
K01/6/C	K1	K1/6	C	river pocket water	river pocket water	river	2008	8	5	10.13. Laccobius minutus	sa		1	1	3	9.4	7.03	17.1	159.3	1.2	2.4	0.9	0.13	9.1	178	1.5	0.0026	100	4.6174	2.26292	2.43296	29.3133	5.54611	40.1046	11.6808	4.04186	9.85053	90.1495	1.24667	2.09333	469.4	0.774993	469.4	0.774993	192.52	41.0141	112.95	24.0626	111.54
K01/6/C	K1	K1/6	C	river pocket water	river pocket water	river	2008	8	5	10.01. Anacaena lutescens	sa		3	3	3	9.4	7.03	17.1	159.3	1.2	2.4	0.9	0.13	9.1	178	1.5	0.0026	100	4.6174	2.26292	2.43296	29.3133	5.54611	40.1046	11.6808	4.04186	9.85053	90.1495	1.24667	2.09333	469.4	0.774993	469.4	0.774993	192.52	41.0141	112.95	24.0626	111.54
K01/6/C	K1	K1/6	C	river pocket water	river pocket water	river	2008	8	5	10.01. Anacaena globulus	sb		1	1	3	9.4	7.03	17.1	159.3	1.2	2.4	0.9	0.13	9.1	178	1.5	0.0026	100	4.6174	2.26292	2.43296	29.3133	5.54611	40.1046	11.6808	4.04186	9.85053	90.1495	1.24667	2.09333	469.4	0.774993	469.4	0.774993	192.52	41.0141	112.95	24.0626	111.54
K01/6/C	K1	K1/6	C	river pocket water	river pocket water	river	2008	4	14	05.01. Agabus paludosus	re		3	3	1	11.2	6.2	9.2	256	0.5	0.2	0.1	0.02	26	110	3.4	0.041	100	4.6174	2.26292	2.43296	29.3133	5.54611	40.1046	11.6808	4.04186	10.6536	89.3464	1.24667	2.09333	469.4	0.774993	469.4	0.774993	192.52	41.0141	112.95	24.0626	111.54
K01/6/B	K1	K1/6	B	river pocket water	river pocket water	river	2008	7	7	05.02. Ilybius fuliginosus	re		1	1	3	2.2	6.38	16	167	0.8	1.7	0.5	0.32	36.5	25	1.7	0.036	99.2647	4.6174	2.26292	2.43296	29.3133	5.54611	40.1046	11.6808	4.04186	5.7085	94.2915	1.24667	2.09333	469.4	0.774993	469.4	0.774993	192.52	41.0141	112.95	24.0626	111.54
K01/6/B	K1	K1/6	B	river pocket water	river pocket water	river	2008	7	7	05.11. Hydaticus seminiger	sb		2	2	3	2.2	6.38	16	167	0.8	1.7	0.5	0.32	36.5	25	1.7	0.036	99.2647	4.6174	2.26292	2.43296	29.3133	5.54611	40.1046	11.6808	4.04186	5.7085	94.2915	1.24667	2.09333	469.4	0.774993	469.4	0.774993	192.52	41.0141	112.95	24.0626	111.54
K01/6/B	K1	K1/6	B	river pocket water	river pocket water	river	2008	7	7	05.01. Agabus bipustulatus	sb		2	2	3	2.2	6.38	16	167	0.8	1.7	0.5	0.32	36.5	25	1.7	0.036	99.2647	4.6174	2.26292	2.43296	29.3133	5.54611	40.1046	11.6808	4.04186	5.7085	94.2915	1.24667	2.09333	469.4	0.774993	469.4	0.774993	192.52	41.0141	112.95	24.0626	111.54
K01/6/B	K1	K1/6	B	river pocket water	river pocket water	river	2008	7	7	10.09. Hydrobius fuscipes	sb		1	1	3	2.2	6.38	16	167	0.8	1.7	0.5	0.32	36.5	25	1.7	0.036	99.2647	4.6174	2.26292	2.43296	29.3133	5.54611	40.1046	11.6808	4.04186	5.7085	94.2915	1.24667	2.09333	469.4	0.774993	469.4	0.774993	192.52	41.0141	112.95	24.0626	111.54
K01/6/B	K1	K1/6	B	river pocket water	river pocket water	river	2008	7	7	05.27. Laccophilus minutus	sb		1	1	3	2.2	6.38	16	167	0.8	1.7	0.5	0.32	36.5	25	1.7	0.036	99.2647	4.6174	2.26292	2.43296	29.3133	5.54611	40.1046	11.6808	4.04186	5.7085	94.2915	1.24667	2.09333	469.4	0.774993	469.4	0.774993	192.52	41.0141	112.95	24.0626	111.54
K01/6/B	K1	K1/6	B	river pocket water	river pocket water	river	2008	7	7	03.01. Noterus crassicornis	sb		1	1	3	2.2	6.38	16	167	0.8	1.7	0.5	0.32	36.5	25	1.7	0.036	99.2647	4.6174	2.26292	2.43296	29.3133	5.54611	40.1046	11.6808	4.04186	5.7085	94.2915	1.24667	2.09333	469.4	0.774993	469.4	0.774993	192.52	41.0141	112.95	24.0626	111.54
K01/8/B	K1	K1/8	B	river current	river current, stones, wetlands	river	2008	9	10	14.02. Elodes sp.	re	65		65	0	1.5	6.18	18.2	156.6	0.2	1.4	0.3	0.08	100	61	3.1	0.1655	4.73773	2.66971	0.987574	1.13951	24.0002	8.26415	52.3034	7.21689	3.41853	9.7617	90.2383	1.24667	1.9903	469.4	0.774993	469.4	0.774993	192.52	41.0141	112.95	24.0626	111.54
K01/8/B	K1	K1/8	B	river current	river current, stones, wetlands	river	2008	9	10	11.01. Hydraena riparia	rb		3	3	0	1.5	6.18	18.2	156.6	0.2	1.4	0.3	0.08	100	61	3.1	0.1655	4.73773	2.66971	0.987574	1.13951	24.0002	8.26415	52.3034	7.21689	3.41853	9.7617	90.2383	1.24667	1.9903	469.4	0.774993	469.4	0.774993	192.52	41.0141	112.95	24.0626	111.54
K01/5/A	K1	K1/5	A	river current	river current	river	2008	5	25	10.09. Hydrobius fuscipes	sb		1	1	0	3.7	8.6	16.6	123	1.5	0.4	0.1	0.06	9.9	170	3.3	0.2027	100	0.411808	0.194336	0.286878	24.1764	15.3526	56.2558	2.35055	0.971682	2.42941	97.5706	2.12667	1.20303	469.4	0.774993	469.4	0.774993	192.52	41.0141	112.95	24.0626	111.54
K01/1/A	K1	K1/1	A	river current	small limnocrene	river	2008	8	5	03.01. Noterus clavicornis	sb		2	2	2	8.9	7.27	16.9	158	1.8	1.7	1	0.16	5.2	202	0.8	0.0092	100	1.1842	0.87631	1.36775	37.409	7.82758	42.9096	7.31245	1.11315	9.50649	90.4935	1.24667	1.9903	469.4	0.774993	469.4	0.774993	192.52	41.0141	112.95	24.0626	111.54
K01/1/A	K1	K1/1	A	river current	small limnocrene	river	2008	8	5	03.01. Noterus crassicornis	sb		1	1	2	8.9	7.27	16.9	158	1.8	1.7	1	0.16	5.2	202	0.8	0.0092	100	1.1842	0.87631	1.36775	37.409	7.82758	42.9096	7.31245	1.11315	9.50649	90.4935	1.24667	1.9903	469.4	0.774993	469.4	0.774993	192.52	41.0141	112.95	24.0626	111.54
K01/1/A	K1	K1/1	A	river current	small limnocrene	river	2008	8	5	10.07. Enochrus melanocephalus	sa		1	1	2	8.9	7.27	16.9	158	1.8	1.7	1	0.16	5.2	202	0.8	0.0092	100	1.1842	0.87631	1.36775	37.409	7.82758	42.9096	7.31245	1.11315	9.50649	90.4935	1.24667	1.9903	469.4	0.774993	469.4	0.774993	192.52	41.0141	112.95	24.0626	111.54
K01/8/A	K1	K1/8	A	river current	river current	river	2008	4	14	14.02. Elodes sp.	re		1	1	0	11.2	6.7	7.7	261	0.3	0.4	0.4	0.01	33	143	4.7	0.2387	30	2.66971	0.987574	1.13951	24.0002	8.26415	52.3034	7.21689	3.41853	10.8186	89.1814	1.24667	1.9903	469.4	0.774993	469.4	0.774993	192.52	41.0141	112.95	24.0626	111.54
K01/6/A	K1	K1/6	A	river pocket water	river pocket water	river	2008	4	14	05.15. Graptodytes granularis	sb		1	1	1	11.2	6.2	9.2	256	0.5	0.2	0.1	0.02	26	110	3.4	0.041	100	4.6174	2.26292	2.43296	29.3133	5.54611	40.1046	11.6808	4.04186	10.6536	89.3464	1.24667	2.09333	469.4	0.774993	469.4	0.774993	192.52	41.0141	112.95	24.0626	111.54
K01/6/A	K1	K1/6	A	river pocket water	river pocket water	river	2008	4	14	05.16. Hydroporus palustris	sb		4	4	1	11.2	6.2	9.2	256	0.5	0.2	0.1	0.02	26	110	3.4	0.041	100	4.6174	2.26292	2.43296	29.3133	5.54611	40.1046	11.6808	4.04186	10.6536	89.3464	1.24667	2.09333	469.4	0.774993	469.4	0.774993	192.52	41.0141	112.95	24.0626	111.54
K01/6/A	K1	K1/6	B	river pocket water	river pocket water	river	2008	8	5	05.10. Dytiscus dimidiatus	sb		2	2	3	9.4	7.03	17.1	159.3	1.2	2.4	0.9	0.13	9.1	178	1.5	0.0026	100	4.6174	2.26292	2.43296	29.3133	5.54611	40.1046	11.6808	4.04186	9.85053	90.1495	1.24667	2.09333	469.4	0.774993	469.4	0.774993	192.52	41.0141	112.95	24.0626	111.54
K01/6/A	K1	K1/6	B	river pocket water	river pocket water	river	2008	8	5	05.01. Agabus bipustulatus	sb		3	3	3	9.4	7.03	17.1	159.3	1.2	2.4	0.9	0.13	9.1	178	1.5	0.0026	100	4.6174	2.26292	2.43296	29.3133	5.54611	40.1046	11.6808	4.04186	9.85053	90.1495	1.24667	2.09333	469.4	0.774993	469.4	0.774993	192.52	41.0141	112.95	24.0626	111.54
K01/6/A	K1	K1/6	B	river pocket water	river pocket water	river	2008	8	5	05.02. Ilybius fuliginosus	re		2	2	3	9.4	7.03	17.1	159.3	1.2	2.4	0.9	0.13	9.1	178	1.5	0.0026	100	4.6174	2.26292	2.43296	29.3133	5.54611	40.1046	11.6808	4.04186	9.85053	90.1495	1.24667	2.09333	469.4	0.774993	469.4	0.774993	192.52	41.0141	112.95	24.0626	111.54
K01/6/A	K1	K1/6	B	river pocket water	river pocket water	river	2008	8	5	05.01. Agabus paludosus	re		1	1	3	9.4	7.03	17.1	159.3	1.2	2.4	0.9	0.13	9.1	178	1.5	0.0026	100	4.6174	2.26292	2.43296	29.3133	5.54611	40.1046	11.6808	4.04186	9.85053	90.1495	1.24667	2.09333	469.4	0.774993	469.4	0.774993	192.52	41.0141	112.95	24.0626	111.54
K01/6/A	K1	K1/6	B	river pocket water	river pocket water	river	2008	8	5	05.01. Agabus undulatus	sb		1	1	3	9.4	7.03	17.1	159.3	1.2	2.4	0.9	0.13	9.1	178	1.5	0.0026	100	4.6174	2.26292	2.43296	29.3133	5.54611	40.1046	11.6808	4.04186	9.85053	90.1495	1.24667	2.09333	469.4	0.774993	469.4	0.774993	192.52	41.0141	112.95	24.0626	111.54
K01/6/A	K1	K1/6	B	river pocket water	river pocket water	river	2008	8	5	05.01. Agabus sturmii	sb		1	1	3	9.4	7.03	17.1	159.3	1.2	2.4	0.9	0.13	9.1	178	1.5	0.0026	100	4.6174	2.26292	2.43296	29.3133	5.54611	40.1046	11.6808	4.04186	9.85053	90.1495	1.24667	2.09333	469.4	0.774993	469.4	0.774993	192.52	41.0141	112.95	24.0626	111.54
K01/6/A	K1	K1/6	B	river pocket water	river pocket water	river	2008	8	5	05.27. Laccophilus minutus	sb		2	2	3	9.4	7.03	17.1	159.3	1.2	2.4	0.9	0.13	9.1	178	1.5	0.0026	100	4.6174	2.26292	2.43296	29.3133	5.54611	40.1046	11.6808	4.04186	9.85053	90.1495	1.24667	2.09333	469.4	0.774993	469.4	0.774993	192.52	41.0141	112.95	24.0626	111.54
K01/6/A	K1	K1/6	B	river pocket water	river pocket water	river	2008	8	5	05.25. Hyphydrus ovatus	sb		1	1	3	9.4	7.03	17.1	159.3	1.2	2.4	0.9	0.13	9.1	178	1.5	0.0026	100	4.6174	2.26292	2.43296	29.3133	5.54611	40.1046	11.6808	4.04186	9.85053	90.1495	1.24667	2.09333	469.4	0.774993	469.4	0.774993	192.52	41.0141	112.95	24.0626	111.54
K01/6/A	K1	K1/6	B	river pocket water	river pocket water	river	2008	8	5	05.16. Hydroporus palustris	sb		1	1	3	9.4	7.03	17.1	159.3	1.2	2.4	0.9	0.13	9.1	178	1.5	0.0026	100	4.6174	2.26292	2.43296	29.3133	5.54611	40.1046	11.6808	4.04186	9.85053	90.1495	1.24667	2.09333	469.4	0.774993	469.4	0.774993	192.52	41.0141	112.95	24.0626	111.54
K01/6/A	K1	K1/6	B	river pocket water	river pocket water	river	2008	8	5	10.01. Anacaena lutescens	sa		1	1	3	9.4	7.03	17.1	159.3	1.2	2.4	0.9	0.13	9.1	178	1.5	0.0026	100	4.6174	2.26292	2.43296	29.3133	5.54611	40.1046	11.6808	4.04186	9.85053	90.1495	1.24667	2.09333	469.4	0.774993	469.4	0.774993	192.52	41.0141	112.95	24.0626	111.54
K01/6/A	K1	K1/6	B	river pocket water	river pocket water	river	2008	8	5	11.01. Hydraena palustris	sa		1	1	3	9.4	7.03	17.1	159.3	1.2	2.4	0.9	0.13	9.1	178	1.5	0.0026	100	4.6174	2.26292	2.43296	29.3133	5.54611	40.1046	11.6808	4.04186	9.85053	90.1495	1.24667	2.09333	469.4	0.774993	469.4	0.774993	192.52	41.0141	112.95	24.0626	111.54
K01/6/C	K1	K1/6	C	river pocket water	river pocket water	river	2008	5	6	10.13. Laccobius minutus	sa		1	1	1	3.7	8.6	16.6	123	1.5	0.4	0.1	0.06	9.9	170	3.3	0.0302	100	4.6174	2.26292	2.43296	29.3133	5.54611	40.1046	11.6808	4.04186	9.81807	90.1819	1.24667	2.04182	469.4	0.774993	469.4	0.774993	192.52	41.0141	112.95	24.0626	111.54
K01/6/C	K1	K1/6	C	river pocket water	river pocket water	river	2008	5	6	02.02. Haliplus ruficollis	sb		1	1	1	3.7	8.6	16.6	123	1.5	0.4	0.1	0.06	9.9	170	3.3	0.0302	100	4.6174	2.26292	2.43296	29.3133	5.54611	40.1046	11.6808	4.04186	9.81807	90.1819	1.24667	2.04182	469.4	0.774993	469.4	0.774993	192.52	41.0141	112.95	24.0626	111.54
K01/6/A	K1	K1/6	A	river pocket water	river pocket water	river	2008	7	7	05.01. Agabus bipustulatus	sb		22	22	3	2.2	6.38	16	167	0.8	1.7	0.5	0.32	36.5	25	1.7	0.036	99.2647	4.6174	2.26292	2.43296	29.3133	5.54611	40.1046	11.6808	4.04186	5.7085	94.2915	1.24667	2.09333	469.4	0.774993	469.4	0.774993	192.52	41.0141	112.95	24.0626	111.54
K01/6/A	K1	K1/6	A	river pocket water	river pocket water	river	2008	7	7	05.02. Ilybius fuliginosus	re		3	3	3	2.2	6.38	16	167	0.8	1.7	0.5	0.32	36.5	25	1.7	0.036	99.2647	4.6174	2.26292	2.43296	29.3133	5.54611	40.1046	11.6808	4.04186	5.7085	94.2915	1.24667	2.09333	469.4	0.774993	469.4	0.774993	192.52	41.0141	112.95	24.0626	111.54
K01/6/A	K1	K1/6	A	river pocket water	river pocket water	river	2008	7	7	10.09. Hydrobius fuscipes	sb		8	8	3	2.2	6.38	16	167	0.8	1.7	0.5	0.32	36.5	25	1.7	0.036	99.2647	4.6174	2.26292	2.43296	29.3133	5.54611	40.1046	11.6808	4.04186	5.7085	94.2915	1.24667	2.09333	469.4	0.774993	469.4	0.774993	192.52	41.0141	112.95	24.0626	111.54
K01/6/A	K1	K1/6	A	river pocket water	river pocket water	river	2008	7	7	05.01. Agabus paludosus	re		5	5	3	2.2	6.38	16	167	0.8	1.7	0.5	0.32	36.5	25	1.7	0.036	99.2647	4.6174	2.26292	2.43296	29.3133	5.54611	40.1046	11.6808	4.04186	5.7085	94.2915	1.24667	2.09333	469.4	0.774993	469.4	0.774993	192.52	41.0141	112.95	24.0626	111.54
K01/6/A	K1	K1/6	A	river pocket water	river pocket water	river	2008	7	7	05.01. Agabus sturmii	sb		3	3	3	2.2	6.38	16	167	0.8	1.7	0.5	0.32	36.5	25	1.7	0.036	99.2647	4.6174	2.26292	2.43296	29.3133	5.54611	40.1046	11.6808	4.04186	5.7085	94.2915	1.24667	2.09333	469.4	0.774993	469.4	0.774993	192.52	41.0141	112.95	24.0626	111.54
K01/6/A	K1	K1/6	A	river pocket water	river pocket water	river	2008	7	7	05.27. Laccophilus minutus	sb		1	1	3	2.2	6.38	16	167	0.8	1.7	0.5	0.32	36.5	25	1.7	0.036	99.2647	4.6174	2.26292	2.43296	29.3133	5.54611	40.1046	11.6808	4.04186	5.7085	94.2915	1.24667	2.09333	469.4	0.774993	469.4	0.774993	192.52	41.0141	112.95	24.0626	111.54
K01/6/A	K1	K1/6	A	river pocket water	river pocket water	river	2008	7	7	05.16. Hydroporus planus	sa		2	2	3	2.2	6.38	16	167	0.8	1.7	0.5	0.32	36.5	25	1.7	0.036	99.2647	4.6174	2.26292	2.43296	29.3133	5.54611	40.1046	11.6808	4.04186	5.7085	94.2915	1.24667	2.09333	469.4	0.774993	469.4	0.774993	192.52	41.0141	112.95	24.0626	111.54
K01/6/A	K1	K1/6	A	river pocket water	river pocket water	river	2008	7	7	01.02. Gyrinus suffriani	sb		1	1	3	2.2	6.38	16	167	0.8	1.7	0.5	0.32	36.5	25	1.7	0.036	99.2647	4.6174	2.26292	2.43296	29.3133	5.54611	40.1046	11.6808	4.04186	5.7085	94.2915	1.24667	2.09333	469.4	0.774993	469.4	0.774993	192.52	41.0141	112.95	24.0626	111.54
K01/6/A	K1	K1/6	A	river pocket water	river pocket water	river	2008	7	7	01.02. Gyrinus substriatus	sb		1	1	3	2.2	6.38	16	167	0.8	1.7	0.5	0.32	36.5	25	1.7	0.036	99.2647	4.6174	2.26292	2.43296	29.3133	5.54611	40.1046	11.6808	4.04186	5.7085	94.2915	1.24667	2.09333	469.4	0.774993	469.4	0.774993	192.52	41.0141	112.95	24.0626	111.54
K01/6/A	K1	K1/6	A	river pocket water	river pocket water	river	2008	7	7	05.02. Ilybius quadriguttatus	sa		1	1	3	2.2	6.38	16	167	0.8	1.7	0.5	0.32	36.5	25	1.7	0.036	99.2647	4.6174	2.26292	2.43296	29.3133	5.54611	40.1046	11.6808	4.04186	5.7085	94.2915	1.24667	2.09333	469.4	0.774993	469.4	0.774993	192.52	41.0141	112.95	24.0626	111.54
K01/6/A	K1	K1/6	A	river pocket water	river pocket water	river	2008	7	7	05.16. Hydroporus incognitus	sa		1	1	3	2.2	6.38	16	167	0.8	1.7	0.5	0.32	36.5	25	1.7	0.036	99.2647	4.6174	2.26292	2.43296	29.3133	5.54611	40.1046	11.6808	4.04186	5.7085	94.2915	1.24667	2.09333	469.4	0.774993	469.4	0.774993	192.52	41.0141	112.95	24.0626	111.54
K01/6/A	K1	K1/6	A	river pocket water	river pocket water	river	2008	7	7	06.01. Helophorus griseus	sa		1	1	3	2.2	6.38	16	167	0.8	1.7	0.5	0.32	36.5	25	1.7	0.036	99.2647	4.6174	2.26292	2.43296	29.3133	5.54611	40.1046	11.6808	4.04186	5.7085	94.2915	1.24667	2.09333	469.4	0.774993	469.4	0.774993	192.52	41.0141	112.95	24.0626	111.54
K01/6/A	K1	K1/6	A	river pocket water	river pocket water	river	2008	7	7	11.01. Hydraena bitteni	sb		1	1	3	2.2	6.38	16	167	0.8	1.7	0.5	0.32	36.5	25	1.7	0.036	99.2647	4.6174	2.26292	2.43296	29.3133	5.54611	40.1046	11.6808	4.04186	5.7085	94.2915	1.24667	2.09333	469.4	0.774993	469.4	0.774993	192.52	41.0141	112.95	24.0626	111.54
K01/6/A	K1	K1/6	A	river pocket water	river pocket water	river	2008	7	7	08.01. Hydrochus elongatus	sb		1	1	3	2.2	6.38	16	167	0.8	1.7	0.5	0.32	36.5	25	1.7	0.036	99.2647	4.6174	2.26292	2.43296	29.3133	5.54611	40.1046	11.6808	4.04186	5.7085	94.2915	1.24667	2.09333	469.4	0.774993	469.4	0.774993	192.52	41.0141	112.95	24.0626	111.54
K01/6/A	K1	K1/6	A	river pocket water	river pocket water	river	2008	7	7	08.01. Hydrochus brevis	sb		1	1	3	2.2	6.38	16	167	0.8	1.7	0.5	0.32	36.5	25	1.7	0.036	99.2647	4.6174	2.26292	2.43296	29.3133	5.54611	40.1046	11.6808	4.04186	5.7085	94.2915	1.24667	2.09333	469.4	0.774993	469.4	0.774993	192.52	41.0141	112.95	24.0626	111.54
K01/6/A	K1	K1/6	A	river pocket water	river pocket water	river	2008	7	7	10.01. Anacaena globulus	sb		1	1	3	2.2	6.38	16	167	0.8	1.7	0.5	0.32	36.5	25	1.7	0.036	99.2647	4.6174	2.26292	2.43296	29.3133	5.54611	40.1046	11.6808	4.04186	5.7085	94.2915	1.24667	2.09333	469.4	0.774993	469.4	0.774993	192.52	41.0141	112.95	24.0626	111.54
K01/5/C	K1	K1/5	C	river current	river current	river	2008	8	5	05.01. Agabus bipustulatus	sb		18	18	0
K01/5/C	K1	K1/5	C	river current	river current	river	2008	8	5	05.02. Ilybius fuliginosus	re		4	4	0
K01/5/C	K1	K1/5	C	river current	river current	river	2008	8	5	05.11. Hydaticus seminiger	sb		1	1	0
K01/5/C	K1	K1/5	C	river current	river current	river	2008	8	5	05.01. Agabus sturmii	sb		1	1	0
K01/5/C	K1	K1/5	C	river current	river current	river	2008	8	5	10.09. Hydrobius fuscipes	sb		1	1	0
K01/5/C	K1	K1/5	C	river current	river current	river	2008	8	5	03.01. Noterus crassicornis	sb		1	1	0
K01/5/C	K1	K1/5	C	river current	river current	river	2008	8	5	10.08. Helochares obscurus	sb		1	1	0
K01/5/C	K1	K1/5	C	river current	river current	river	2008	8	5	11.01. Hydraena palustris	sa		1	1	0
K01/5/C	K1	K1/5	C	river current	river current	river	2008	8	5	10.06. Cymbiodyta marginella	sa		1	1	0
K01/5/C	K1	K1/5	C	river current	river current	river	2008	8	5	08.01. Hydrochus elongatus	sb		3	3	0
K01/5/C	K1	K1/5	C	river current	river current	river	2008	8	5	10.13. Laccobius minutus	sa		2	2	0
K01/5/C	K1	K1/5	C	river current	river current	river	2008	8	5	10.01. Anacaena globulus	sb		1	1	0
K01/5/C	K1	K1/5	C	river current	river current	river	2008	8	5	10.01. Anacaena lutescens	sa		3	3	0
K01/5/C	K1	K1/5	C	river current	river current	river	2008	8	5	11.01. Limnebius parvulus	sb		1	1	0
K01/5/C	K1	K1/5	C	river current	river current	river	2008	8	5	11.01. Limnebius atomus	sb		1	1	0
K01/5/C	K1	K1/5	C	river current	river current	river	2008	8	5	06.01. Helophorus griseus	sa		1	1	0
K01/5/C	K1	K1/5	C	river current	river current	river	2008	8	5	05.01. Agabus sp.	sb	1		1	0
K01/5/A	K1	K1/5	A	river current	river current, sand, meadow	river	2008	10	13	05.01. Agabus bipustulatus	sb		3	3	0	2.3	7.01	10.1	148.2	0.5	1.9	0.2	0	25	178	3.2	0.3579	109.444	2.30769	1.19155	1.16139	36.3499	8.71795	42.4887	5.23379	2.54902	9.68015	90.3199	1.24667	1.86303	469.4	0.774993	469.4	0.774993	192.52	41.0141	112.95	24.0626	111.54
K01/5/A	K1	K1/5	A	river current	river current, sand, meadow	river	2008	10	13	10.01. Anacaena limbata	sb		1	1	0	2.3	7.01	10.1	148.2	0.5	1.9	0.2	0	25	178	3.2	0.3579	109.444	2.30769	1.19155	1.16139	36.3499	8.71795	42.4887	5.23379	2.54902	9.68015	90.3199	1.24667	1.86303	469.4	0.774993	469.4	0.774993	192.52	41.0141	112.95	24.0626	111.54
K01/5/A	K1	K1/5	A	river current	river current, sand, meadow	river	2008	10	13	14.02. Elodes sp.	re	2		2	0	2.3	7.01	10.1	148.2	0.5	1.9	0.2	0	25	178	3.2	0.3579	109.444	2.30769	1.19155	1.16139	36.3499	8.71795	42.4887	5.23379	2.54902	9.68015	90.3199	1.24667	1.86303	469.4	0.774993	469.4	0.774993	192.52	41.0141	112.95	24.0626	111.54
K01/5/A	K1	K1/5	A	river current	river current, sand, meadow	river	2008	10	13	05.01. Agabus sp.	sb	1		1	0	2.3	7.01	10.1	148.2	0.5	1.9	0.2	0	25	178	3.2	0.3579	109.444	2.30769	1.19155	1.16139	36.3499	8.71795	42.4887	5.23379	2.54902	9.68015	90.3199	1.24667	1.86303	469.4	0.774993	469.4	0.774993	192.52	41.0141	112.95	24.0626	111.54
K01/5/A	K1	K1/5	A	river current	river current, sand, meadow	river	2008	10	13	05.02. Ilybius sp.	sa	1		1	0	2.3	7.01	10.1	148.2	0.5	1.9	0.2	0	25	178	3.2	0.3579	109.444	2.30769	1.19155	1.16139	36.3499	8.71795	42.4887	5.23379	2.54902	9.68015	90.3199	1.24667	1.86303	469.4	0.774993	469.4	0.774993	192.52	41.0141	112.95	24.0626	111.54
K01/5/A	K1	K1/5	A	river current	river current, sand, meadow	river	2008	10	13	10.17. Cryptopleurum minutum	sb		1	1	0	2.3	7.01	10.1	148.2	0.5	1.9	0.2	0	25	178	3.2	0.3579	109.444	2.30769	1.19155	1.16139	36.3499	8.71795	42.4887	5.23379	2.54902	9.68015	90.3199	1.24667	1.86303	469.4	0.774993	469.4	0.774993	192.52	41.0141	112.95	24.0626	111.54
K01/6/B	K1	K1/6	B	river pocket water	river pocket water	river	2008	4	14	10.01. Anacaena lutescens	sa		1	1	1	11.2	6.2	9.2	256	0.5	0.2	0.1	0.02	26	110	3.4	0.041	100	4.6174	2.26292	2.43296	29.3133	5.54611	40.1046	11.6808	4.04186	10.6536	89.3464	1.24667	2.09333	469.4	0.774993	469.4	0.774993	192.52	41.0141	112.95	24.0626	111.54
K01/6/B	K1	K1/6	B	river pocket water	river pocket water	river	2008	4	14	14.02. Elodes sp.	re	2		2	1	11.2	6.2	9.2	256	0.5	0.2	0.1	0.02	26	110	3.4	0.041	100	4.6174	2.26292	2.43296	29.3133	5.54611	40.1046	11.6808	4.04186	10.6536	89.3464	1.24667	2.09333	469.4	0.774993	469.4	0.774993	192.52	41.0141	112.95	24.0626	111.54
K01/8/B	K1	K1/8	B	river current	river current, stones	river	2008	7	7	11.01. Hydraena riparia	rb		6	6	0	5.4	7.5	15.7	159	0.4	1.2	0.5	0.3	53.7	109	3.2	0.1326	0.845588	2.66971	0.987574	1.13951	24.0002	8.26415	52.3034	7.21689	3.41853	9.70871	90.2913	1.24667	1.9903	469.4	0.774993	469.4	0.774993	192.52	41.0141	112.95	24.0626	111.54
K01/8/B	K1	K1/8	B	river current	river current, stones	river	2008	7	7	11.01. Limnebius parvulus	sb		1	1	0	5.4	7.5	15.7	159	0.4	1.2	0.5	0.3	53.7	109	3.2	0.1326	0.845588	2.66971	0.987574	1.13951	24.0002	8.26415	52.3034	7.21689	3.41853	9.70871	90.2913	1.24667	1.9903	469.4	0.774993	469.4	0.774993	192.52	41.0141	112.95	24.0626	111.54
K01/2/C	K1	K1/2	C	river pocket water	small limnocrene	wody stojące	2008	5	6	10.09. Hydrobius fuscipes	sb	4	2	6	2	6	7.9	16.7	123	1.3	0.4	0.1	0.04	6	80	4.4	0.0009	100	1.1842	0.87631	1.36775	37.409	7.82758	42.9096	7.31245	1.11315	6.04905	93.951	1.24667	1.9903	469.4	0.774993	469.4	0.774993	192.52	41.0141	112.95	24.0626	111.54
K01/2/C	K1	K1/2	C	river pocket water	small limnocrene	wody stojące	2008	5	6	06.01. Helophorus flavipes	sa		5	5	2	6	7.9	16.7	123	1.3	0.4	0.1	0.04	6	80	4.4	0.0009	100	1.1842	0.87631	1.36775	37.409	7.82758	42.9096	7.31245	1.11315	6.04905	93.951	1.24667	1.9903	469.4	0.774993	469.4	0.774993	192.52	41.0141	112.95	24.0626	111.54
K01/2/C	K1	K1/2	C	river pocket water	small limnocrene	wody stojące	2008	5	6	06.01. Helophorus griseus	sa		1	1	2	6	7.9	16.7	123	1.3	0.4	0.1	0.04	6	80	4.4	0.0009	100	1.1842	0.87631	1.36775	37.409	7.82758	42.9096	7.31245	1.11315	6.04905	93.951	1.24667	1.9903	469.4	0.774993	469.4	0.774993	192.52	41.0141	112.95	24.0626	111.54
K01/2/C	K1	K1/2	C	river pocket water	small limnocrene	wody stojące	2008	5	6	05.04. Colymbetes striatus	sa	1		1	2	6	7.9	16.7	123	1.3	0.4	0.1	0.04	6	80	4.4	0.0009	100	1.1842	0.87631	1.36775	37.409	7.82758	42.9096	7.31245	1.11315	6.04905	93.951	1.24667	1.9903	469.4	0.774993	469.4	0.774993	192.52	41.0141	112.95	24.0626	111.54
K01/2/C	K1	K1/2	C	river pocket water	small limnocrene	wody stojące	2008	5	6	05.01. Agabus sp.	sb	1		1	2	6	7.9	16.7	123	1.3	0.4	0.1	0.04	6	80	4.4	0.0009	100	1.1842	0.87631	1.36775	37.409	7.82758	42.9096	7.31245	1.11315	6.04905	93.951	1.24667	1.9903	469.4	0.774993	469.4	0.774993	192.52	41.0141	112.95	24.0626	111.54
K01/2/C	K1	K1/2	C	river pocket water	small limnocrene	wody stojące	2008	5	6	10.01. Anacaena lutescens	sa		5	5	2	6	7.9	16.7	123	1.3	0.4	0.1	0.04	6	80	4.4	0.0009	100	1.1842	0.87631	1.36775	37.409	7.82758	42.9096	7.31245	1.11315	6.04905	93.951	1.24667	1.9903	469.4	0.774993	469.4	0.774993	192.52	41.0141	112.95	24.0626	111.54
K01/9/B	K1	K1/9	B	river pocket water	river pocket, wetlands	river	2008	7	7	05.05. Rhantus frontalis	sb		1	1	0	5.4	7.5	15.7	159	0.4	1.2	0.5	0.3	53.7	109	3.2	-0.0229	0.845588	20.7781	4.63851	3.43467	28.8104	8.95736	29.0893	2.23764	2.054	3.84203	96.158	1.54667	1.33303	469.4	0.774993	469.4	0.774993	192.52	41.0141	112.95	24.0626	111.54
K01/9/A	K1	K1/9	A	river pocket water	river pocket, wetlands	river	2008	7	7	05.02. Ilybius fuliginosus	re		6	6	0	5.4	7.5	15.7	159	0.4	1.2	0.5	0.3	53.7	109	3.2	-0.0229	0.845588	20.7781	4.63851	3.43467	28.8104	8.95736	29.0893	2.23764	2.054	3.84203	96.158	1.54667	1.33303	469.4	0.774993	469.4	0.774993	192.52	41.0141	112.95	24.0626	111.54
K01/9/A	K1	K1/9	A	river pocket water	river pocket, wetlands	river	2008	7	7	05.01. Agabus paludosus	re		1	1	0	5.4	7.5	15.7	159	0.4	1.2	0.5	0.3	53.7	109	3.2	-0.0229	0.845588	20.7781	4.63851	3.43467	28.8104	8.95736	29.0893	2.23764	2.054	3.84203	96.158	1.54667	1.33303	469.4	0.774993	469.4	0.774993	192.52	41.0141	112.95	24.0626	111.54
K01/9/C	K1	K1/9	C	river pocket water	river pocket, wetlands	river	2008	7	7	05.02. Ilybius fuliginosus	re		2	2	0	5.4	7.5	15.7	159	0.4	1.2	0.5	0.3	53.7	109	3.2	-0.0229	0.845588	20.7781	4.63851	3.43467	28.8104	8.95736	29.0893	2.23764	2.054	3.84203	96.158	1.54667	1.33303	469.4	0.774993	469.4	0.774993	192.52	41.0141	112.95	24.0626	111.54
K01/6/A	K1	K1/6	A	river pocket water	river pocket, meadow	river	2008	6	2	05.08. Graphoderus cinereus	sb		1	1	3	8.9	6.5	20.4	154	0.8	1.6	0.2	0.12	29	219	2.7	0.044	100	4.6174	2.26292	2.43296	29.3133	5.54611	40.1046	11.6808	4.04186	4.31185	95.6881	1.24667	2.09333	469.4	0.774993	469.4	0.774993	192.52	41.0141	112.95	24.0626	111.54
K01/6/A	K1	K1/6	A	river pocket water	river pocket, meadow	river	2008	6	2	05.01. Agabus bipustulatus	sb		1	1	3	8.9	6.5	20.4	154	0.8	1.6	0.2	0.12	29	219	2.7	0.044	100	4.6174	2.26292	2.43296	29.3133	5.54611	40.1046	11.6808	4.04186	4.31185	95.6881	1.24667	2.09333	469.4	0.774993	469.4	0.774993	192.52	41.0141	112.95	24.0626	111.54
K01/6/A	K1	K1/6	A	river pocket water	river pocket, meadow	river	2008	6	2	05.01. Agabus chalconatus	sb		1	1	3	8.9	6.5	20.4	154	0.8	1.6	0.2	0.12	29	219	2.7	0.044	100	4.6174	2.26292	2.43296	29.3133	5.54611	40.1046	11.6808	4.04186	4.31185	95.6881	1.24667	2.09333	469.4	0.774993	469.4	0.774993	192.52	41.0141	112.95	24.0626	111.54
K01/6/A	K1	K1/6	A	river pocket water	river pocket, meadow	river	2008	6	2	05.24. Hygrotus impressopunctatus	sb		1	1	3	8.9	6.5	20.4	154	0.8	1.6	0.2	0.12	29	219	2.7	0.044	100	4.6174	2.26292	2.43296	29.3133	5.54611	40.1046	11.6808	4.04186	4.31185	95.6881	1.24667	2.09333	469.4	0.774993	469.4	0.774993	192.52	41.0141	112.95	24.0626	111.54
K01/6/A	K1	K1/6	A	river pocket water	river pocket, meadow	river	2008	6	2	10.13. Laccobius minutus	sa		2	2	3	8.9	6.5	20.4	154	0.8	1.6	0.2	0.12	29	219	2.7	0.044	100	4.6174	2.26292	2.43296	29.3133	5.54611	40.1046	11.6808	4.04186	4.31185	95.6881	1.24667	2.09333	469.4	0.774993	469.4	0.774993	192.52	41.0141	112.95	24.0626	111.54
K01/6/A	K1	K1/6	A	river pocket water	river pocket, meadow	river	2008	6	2	05.24. Hygrotus inaequalis	sb		5	5	3	8.9	6.5	20.4	154	0.8	1.6	0.2	0.12	29	219	2.7	0.044	100	4.6174	2.26292	2.43296	29.3133	5.54611	40.1046	11.6808	4.04186	4.31185	95.6881	1.24667	2.09333	469.4	0.774993	469.4	0.774993	192.52	41.0141	112.95	24.0626	111.54
K01/6/A	K1	K1/6	A	river pocket water	river pocket, meadow	river	2008	6	2	05.16. Hydroporus palustris	sb		6	6	3	8.9	6.5	20.4	154	0.8	1.6	0.2	0.12	29	219	2.7	0.044	100	4.6174	2.26292	2.43296	29.3133	5.54611	40.1046	11.6808	4.04186	4.31185	95.6881	1.24667	2.09333	469.4	0.774993	469.4	0.774993	192.52	41.0141	112.95	24.0626	111.54
K01/5/C	K1	K1/5	C	river current	river current, sand	river	2008	6	2	05.10. Dytiscus sp.	sb		1	1	0
K01/1/A	K1	K1/1	A	river current	limnocrene	river	2008	8	2	05.10. Dytiscus sp.	sb	1		1	2	8.9	7.27	16.9	158	1.8	1.7	1	0.16	5.2	202	0.8	0.0092	100	1.1842	0.87631	1.36775	37.409	7.82758	42.9096	7.31245	1.11315	9.50649	90.4935	1.24667	1.9903	469.4	0.774993	469.4	0.774993	192.52	41.0141	112.95	24.0626	111.54
K01/1/A	K1	K1/1	A	river current	limnocrene	river	2008	8	2	05.02. Ilybius sp.	sa	1		1	2	8.9	7.27	16.9	158	1.8	1.7	1	0.16	5.2	202	0.8	0.0092	100	1.1842	0.87631	1.36775	37.409	7.82758	42.9096	7.31245	1.11315	9.50649	90.4935	1.24667	1.9903	469.4	0.774993	469.4	0.774993	192.52	41.0141	112.95	24.0626	111.54
K01/1/A	K1	K1/1	A	river current	limnocrene	river	2008	8	2	06.01. Helophorus griseus	sa		1	1	2	8.9	7.27	16.9	158	1.8	1.7	1	0.16	5.2	202	0.8	0.0092	100	1.1842	0.87631	1.36775	37.409	7.82758	42.9096	7.31245	1.11315	9.50649	90.4935	1.24667	1.9903	469.4	0.774993	469.4	0.774993	192.52	41.0141	112.95	24.0626	111.54
K01/1/A	K1	K1/1	A	river current	limnocrene	river	2008	8	2	05.24. Hygrotus inaequalis	sb		1	1	2	8.9	7.27	16.9	158	1.8	1.7	1	0.16	5.2	202	0.8	0.0092	100	1.1842	0.87631	1.36775	37.409	7.82758	42.9096	7.31245	1.11315	9.50649	90.4935	1.24667	1.9903	469.4	0.774993	469.4	0.774993	192.52	41.0141	112.95	24.0626	111.54
K01/1/A	K1	K1/1	A	river current	limnocrene	river	2008	8	2	10.06. Cymbiodyta marginella	sa		2	2	2	8.9	7.27	16.9	158	1.8	1.7	1	0.16	5.2	202	0.8	0.0092	100	1.1842	0.87631	1.36775	37.409	7.82758	42.9096	7.31245	1.11315	9.50649	90.4935	1.24667	1.9903	469.4	0.774993	469.4	0.774993	192.52	41.0141	112.95	24.0626	111.54
K01/1/A	K1	K1/1	A	river current	limnocrene	river	2008	8	2	05.16. Hydroporus planus	sa		1	1	2	8.9	7.27	16.9	158	1.8	1.7	1	0.16	5.2	202	0.8	0.0092	100	1.1842	0.87631	1.36775	37.409	7.82758	42.9096	7.31245	1.11315	9.50649	90.4935	1.24667	1.9903	469.4	0.774993	469.4	0.774993	192.52	41.0141	112.95	24.0626	111.54
K01/5/B	K1	K1/5	B	river current	river current	river	2008	9	10	05.02. Ilybius fuliginosus	re		6	6	0	1.5	6.18	18.2	156.6	0.4	1.8	0.3	0.13	1.5	91	1.2	0.5938	100	0.411808	0.194336	0.286878	24.1764	15.3526	56.2558	2.35055	0.971682	6.59834	93.4017	2.12667	1.20303	469.4	0.774993	469.4	0.774993	192.52	41.0141	112.95	24.0626	111.54
K01/5/B	K1	K1/5	B	river current	river current	river	2008	9	10	10.13. Laccobius minutus	sa		3	3	0	1.5	6.18	18.2	156.6	0.4	1.8	0.3	0.13	1.5	91	1.2	0.5938	100	0.411808	0.194336	0.286878	24.1764	15.3526	56.2558	2.35055	0.971682	6.59834	93.4017	2.12667	1.20303	469.4	0.774993	469.4	0.774993	192.52	41.0141	112.95	24.0626	111.54
K01/5/B	K1	K1/5	B	river current	river current	river	2008	9	10	10.01. Anacaena lutescens	sa		3	3	0	1.5	6.18	18.2	156.6	0.4	1.8	0.3	0.13	1.5	91	1.2	0.5938	100	0.411808	0.194336	0.286878	24.1764	15.3526	56.2558	2.35055	0.971682	6.59834	93.4017	2.12667	1.20303	469.4	0.774993	469.4	0.774993	192.52	41.0141	112.95	24.0626	111.54
K01/5/B	K1	K1/5	B	river current	river current	river	2008	9	10	06.01. Helophorus griseus	sa		1	1	0	1.5	6.18	18.2	156.6	0.4	1.8	0.3	0.13	1.5	91	1.2	0.5938	100	0.411808	0.194336	0.286878	24.1764	15.3526	56.2558	2.35055	0.971682	6.59834	93.4017	2.12667	1.20303	469.4	0.774993	469.4	0.774993	192.52	41.0141	112.95	24.0626	111.54
K01/5/B	K1	K1/5	B	river current	river current	river	2008	9	10	11.01. Hydraena riparia	rb		2	2	0	1.5	6.18	18.2	156.6	0.4	1.8	0.3	0.13	1.5	91	1.2	0.5938	100	0.411808	0.194336	0.286878	24.1764	15.3526	56.2558	2.35055	0.971682	6.59834	93.4017	2.12667	1.20303	469.4	0.774993	469.4	0.774993	192.52	41.0141	112.95	24.0626	111.54
K01/6/C	K1	K1/6	C	river pocket water	river pocket water	river	2008	6	2	05.01. Agabus bipustulatus	sb		6	6	3	8.9	6.5	20.4	154	0.8	1.6	0.2	0.12	29	219	2.7	0.044	100	4.6174	2.26292	2.43296	29.3133	5.54611	40.1046	11.6808	4.04186	4.31185	95.6881	1.24667	2.09333	469.4	0.774993	469.4	0.774993	192.52	41.0141	112.95	24.0626	111.54
K01/6/C	K1	K1/6	C	river pocket water	river pocket water	river	2008	6	2	05.10. Dytiscus sp.	sb	1		1	3	8.9	6.5	20.4	154	0.8	1.6	0.2	0.12	29	219	2.7	0.044	100	4.6174	2.26292	2.43296	29.3133	5.54611	40.1046	11.6808	4.04186	4.31185	95.6881	1.24667	2.09333	469.4	0.774993	469.4	0.774993	192.52	41.0141	112.95	24.0626	111.54
K01/6/C	K1	K1/6	C	river pocket water	river pocket water	river	2008	6	2	10.09. Hydrobius fuscipes	sb	6		6	3	8.9	6.5	20.4	154	0.8	1.6	0.2	0.12	29	219	2.7	0.044	100	4.6174	2.26292	2.43296	29.3133	5.54611	40.1046	11.6808	4.04186	4.31185	95.6881	1.24667	2.09333	469.4	0.774993	469.4	0.774993	192.52	41.0141	112.95	24.0626	111.54
K01/6/C	K1	K1/6	C	river pocket water	river pocket water	river	2008	6	2	01.02. Gyrinus natator	sb		1	1	3	8.9	6.5	20.4	154	0.8	1.6	0.2	0.12	29	219	2.7	0.044	100	4.6174	2.26292	2.43296	29.3133	5.54611	40.1046	11.6808	4.04186	4.31185	95.6881	1.24667	2.09333	469.4	0.774993	469.4	0.774993	192.52	41.0141	112.95	24.0626	111.54
K01/6/C	K1	K1/6	C	river pocket water	river pocket water	river	2008	6	2	03.01. Noterus crassicornis	sb		1	1	3	8.9	6.5	20.4	154	0.8	1.6	0.2	0.12	29	219	2.7	0.044	100	4.6174	2.26292	2.43296	29.3133	5.54611	40.1046	11.6808	4.04186	4.31185	95.6881	1.24667	2.09333	469.4	0.774993	469.4	0.774993	192.52	41.0141	112.95	24.0626	111.54
K01/6/C	K1	K1/6	C	river pocket water	river pocket water	river	2008	6	2	05.24. Hygrotus inaequalis	sb		1	1	3	8.9	6.5	20.4	154	0.8	1.6	0.2	0.12	29	219	2.7	0.044	100	4.6174	2.26292	2.43296	29.3133	5.54611	40.1046	11.6808	4.04186	4.31185	95.6881	1.24667	2.09333	469.4	0.774993	469.4	0.774993	192.52	41.0141	112.95	24.0626	111.54
K01/6/C	K1	K1/6	C	river pocket water	river pocket water	river	2008	6	2	10.01. Anacaena globulus	sb		3	3	3	8.9	6.5	20.4	154	0.8	1.6	0.2	0.12	29	219	2.7	0.044	100	4.6174	2.26292	2.43296	29.3133	5.54611	40.1046	11.6808	4.04186	4.31185	95.6881	1.24667	2.09333	469.4	0.774993	469.4	0.774993	192.52	41.0141	112.95	24.0626	111.54
K01/6/C	K1	K1/6	C	river pocket water	river pocket water	river	2008	6	2	10.01. Anacaena limbata	sb		1	1	3	8.9	6.5	20.4	154	0.8	1.6	0.2	0.12	29	219	2.7	0.044	100	4.6174	2.26292	2.43296	29.3133	5.54611	40.1046	11.6808	4.04186	4.31185	95.6881	1.24667	2.09333	469.4	0.774993	469.4	0.774993	192.52	41.0141	112.95	24.0626	111.54
K01/6/C	K1	K1/6	C	river pocket water	river pocket water	river	2008	6	2	10.01. Anacaena lutescens	sa		3	3	3	8.9	6.5	20.4	154	0.8	1.6	0.2	0.12	29	219	2.7	0.044	100	4.6174	2.26292	2.43296	29.3133	5.54611	40.1046	11.6808	4.04186	4.31185	95.6881	1.24667	2.09333	469.4	0.774993	469.4	0.774993	192.52	41.0141	112.95	24.0626	111.54
K01/6/C	K1	K1/6	C	river pocket water	river pocket water	river	2008	6	2	11.01. Hydraena palustris	sa		1	1	3	8.9	6.5	20.4	154	0.8	1.6	0.2	0.12	29	219	2.7	0.044	100	4.6174	2.26292	2.43296	29.3133	5.54611	40.1046	11.6808	4.04186	4.31185	95.6881	1.24667	2.09333	469.4	0.774993	469.4	0.774993	192.52	41.0141	112.95	24.0626	111.54
K01/6/C	K1	K1/6	C	river pocket water	river pocket water	river	2008	6	2	11.01. Limnebius atomus	sb		1	1	3	8.9	6.5	20.4	154	0.8	1.6	0.2	0.12	29	219	2.7	0.044	100	4.6174	2.26292	2.43296	29.3133	5.54611	40.1046	11.6808	4.04186	4.31185	95.6881	1.24667	2.09333	469.4	0.774993	469.4	0.774993	192.52	41.0141	112.95	24.0626	111.54
K01/6/C	K1	K1/6	C	river pocket water	river pocket water	river	2008	6	2	05.16. Hydroporus palustris	sb		2	2	3	8.9	6.5	20.4	154	0.8	1.6	0.2	0.12	29	219	2.7	0.044	100	4.6174	2.26292	2.43296	29.3133	5.54611	40.1046	11.6808	4.04186	4.31185	95.6881	1.24667	2.09333	469.4	0.774993	469.4	0.774993	192.52	41.0141	112.95	24.0626	111.54
K01/6/C	K1	K1/6	C	river pocket water	river pocket water	river	2008	6	2	05.16. Hydroporus angustatus	sa		3	3	3	8.9	6.5	20.4	154	0.8	1.6	0.2	0.12	29	219	2.7	0.044	100	4.6174	2.26292	2.43296	29.3133	5.54611	40.1046	11.6808	4.04186	4.31185	95.6881	1.24667	2.09333	469.4	0.774993	469.4	0.774993	192.52	41.0141	112.95	24.0626	111.54
K01/1/B	K1	K1/1	B	river current	limnocrene	river	2008	7	7	05.01. Agabus bipustulatus	sb		8	8	2	8.3	7.26	16.4	166	0.8	1.3	0.8	0.36	38.7	109	2.8	0.0008	100	1.1842	0.87631	1.36775	37.409	7.82758	42.9096	7.31245	1.11315	13.5821	86.4179	1.24667	1.86303	469.4	0.774993	469.4	0.774993	192.52	41.0141	112.95	24.0626	111.54
K01/1/B	K1	K1/1	B	river current	limnocrene	river	2008	7	7	10.11. Hydrochara caraboides	sb		1	1	2	8.3	7.26	16.4	166	0.8	1.3	0.8	0.36	38.7	109	2.8	0.0008	100	1.1842	0.87631	1.36775	37.409	7.82758	42.9096	7.31245	1.11315	13.5821	86.4179	1.24667	1.86303	469.4	0.774993	469.4	0.774993	192.52	41.0141	112.95	24.0626	111.54
K01/1/B	K1	K1/1	B	river current	limnocrene	river	2008	7	7	10.08. Helochares obscurus	sb		1	1	2	8.3	7.26	16.4	166	0.8	1.3	0.8	0.36	38.7	109	2.8	0.0008	100	1.1842	0.87631	1.36775	37.409	7.82758	42.9096	7.31245	1.11315	13.5821	86.4179	1.24667	1.86303	469.4	0.774993	469.4	0.774993	192.52	41.0141	112.95	24.0626	111.54
K01/1/B	K1	K1/1	B	river current	limnocrene	river	2008	7	7	06.01. Helophorus griseus	sa		1	1	2	8.3	7.26	16.4	166	0.8	1.3	0.8	0.36	38.7	109	2.8	0.0008	100	1.1842	0.87631	1.36775	37.409	7.82758	42.9096	7.31245	1.11315	13.5821	86.4179	1.24667	1.86303	469.4	0.774993	469.4	0.774993	192.52	41.0141	112.95	24.0626	111.54
K01/1/B	K1	K1/1	B	river current	limnocrene	river	2008	7	7	11.01. Limnebius parvulus	sb		1	1	2	8.3	7.26	16.4	166	0.8	1.3	0.8	0.36	38.7	109	2.8	0.0008	100	1.1842	0.87631	1.36775	37.409	7.82758	42.9096	7.31245	1.11315	13.5821	86.4179	1.24667	1.86303	469.4	0.774993	469.4	0.774993	192.52	41.0141	112.95	24.0626	111.54
K01/1/B	K1	K1/1	B	river current	limnocrene	river	2008	7	7	11.01. Hydraena palustris	sa		1	1	2	8.3	7.26	16.4	166	0.8	1.3	0.8	0.36	38.7	109	2.8	0.0008	100	1.1842	0.87631	1.36775	37.409	7.82758	42.9096	7.31245	1.11315	13.5821	86.4179	1.24667	1.86303	469.4	0.774993	469.4	0.774993	192.52	41.0141	112.95	24.0626	111.54
K01/1/B	K1	K1/1	B	river current	limnocrene	river	2008	7	7	10.17. Cryptopleurum minutum	sb		1	1	2	8.3	7.26	16.4	166	0.8	1.3	0.8	0.36	38.7	109	2.8	0.0008	100	1.1842	0.87631	1.36775	37.409	7.82758	42.9096	7.31245	1.11315	13.5821	86.4179	1.24667	1.86303	469.4	0.774993	469.4	0.774993	192.52	41.0141	112.95	24.0626	111.54
K01/6/A	K1	K1/6	A	river pocket water	river pocket water	river	2008	5	6	05.10. Dytiscus sp.	sb	1		1	1	3.7	8.6	16.6	123	1.5	0.4	0.1	0.06	9.9	170	3.3	0.0302	100	4.6174	2.26292	2.43296	29.3133	5.54611	40.1046	11.6808	4.04186	9.81807	90.1819	1.24667	2.04182	469.4	0.774993	469.4	0.774993	192.52	41.0141	112.95	24.0626	111.54
K01/6/A	K1	K1/6	A	river pocket water	river pocket water	river	2008	5	6	05.01. Agabus bipustulatus	sb		1	1	1	3.7	8.6	16.6	123	1.5	0.4	0.1	0.06	9.9	170	3.3	0.0302	100	4.6174	2.26292	2.43296	29.3133	5.54611	40.1046	11.6808	4.04186	9.81807	90.1819	1.24667	2.04182	469.4	0.774993	469.4	0.774993	192.52	41.0141	112.95	24.0626	111.54
K01/6/A	K1	K1/6	A	river pocket water	river pocket water	river	2008	5	6	05.01. Agabus sturmii	sb		1	1	1	3.7	8.6	16.6	123	1.5	0.4	0.1	0.06	9.9	170	3.3	0.0302	100	4.6174	2.26292	2.43296	29.3133	5.54611	40.1046	11.6808	4.04186	9.81807	90.1819	1.24667	2.04182	469.4	0.774993	469.4	0.774993	192.52	41.0141	112.95	24.0626	111.54
K01/6/A	K1	K1/6	A	river pocket water	river pocket water	river	2008	5	6	10.01. Anacaena globulus	sb		1	1	1	3.7	8.6	16.6	123	1.5	0.4	0.1	0.06	9.9	170	3.3	0.0302	100	4.6174	2.26292	2.43296	29.3133	5.54611	40.1046	11.6808	4.04186	9.81807	90.1819	1.24667	2.04182	469.4	0.774993	469.4	0.774993	192.52	41.0141	112.95	24.0626	111.54
K01/6/A	K1	K1/6	A	river pocket water	river pocket water	river	2008	5	6	10.01. Anacaena lutescens	sa		5	5	1	3.7	8.6	16.6	123	1.5	0.4	0.1	0.06	9.9	170	3.3	0.0302	100	4.6174	2.26292	2.43296	29.3133	5.54611	40.1046	11.6808	4.04186	9.81807	90.1819	1.24667	2.04182	469.4	0.774993	469.4	0.774993	192.52	41.0141	112.95	24.0626	111.54
K01/6/A	K1	K1/6	A	river pocket water	river pocket water	river	2008	5	6	10.01. Anacaena limbata	sb		3	3	1	3.7	8.6	16.6	123	1.5	0.4	0.1	0.06	9.9	170	3.3	0.0302	100	4.6174	2.26292	2.43296	29.3133	5.54611	40.1046	11.6808	4.04186	9.81807	90.1819	1.24667	2.04182	469.4	0.774993	469.4	0.774993	192.52	41.0141	112.95	24.0626	111.54
K01/6/A	K1	K1/6	A	river pocket water	river pocket water	river	2008	5	6	05.16. Hydroporus palustris	sb		1	1	1	3.7	8.6	16.6	123	1.5	0.4	0.1	0.06	9.9	170	3.3	0.0302	100	4.6174	2.26292	2.43296	29.3133	5.54611	40.1046	11.6808	4.04186	9.81807	90.1819	1.24667	2.04182	469.4	0.774993	469.4	0.774993	192.52	41.0141	112.95	24.0626	111.54
K01/6/C	K1	K1/6	C	river pocket water	river pocket water	river	2008	7	7	05.02. Ilybius fuliginosus	re		2	2	3	2.2	6.38	16	167	0.8	1.7	0.5	0.32	36.5	25	1.7	0.036	99.2647	4.6174	2.26292	2.43296	29.3133	5.54611	40.1046	11.6808	4.04186	5.7085	94.2915	1.24667	2.09333	469.4	0.774993	469.4	0.774993	192.52	41.0141	112.95	24.0626	111.54
K01/6/C	K1	K1/6	C	river pocket water	river pocket water	river	2008	7	7	05.01. Agabus bipustulatus	sb		7	7	3	2.2	6.38	16	167	0.8	1.7	0.5	0.32	36.5	25	1.7	0.036	99.2647	4.6174	2.26292	2.43296	29.3133	5.54611	40.1046	11.6808	4.04186	5.7085	94.2915	1.24667	2.09333	469.4	0.774993	469.4	0.774993	192.52	41.0141	112.95	24.0626	111.54
K01/6/C	K1	K1/6	C	river pocket water	river pocket water	river	2008	7	7	05.01. Agabus paludosus	re		1	1	3	2.2	6.38	16	167	0.8	1.7	0.5	0.32	36.5	25	1.7	0.036	99.2647	4.6174	2.26292	2.43296	29.3133	5.54611	40.1046	11.6808	4.04186	5.7085	94.2915	1.24667	2.09333	469.4	0.774993	469.4	0.774993	192.52	41.0141	112.95	24.0626	111.54
K01/6/C	K1	K1/6	C	river pocket water	river pocket water	river	2008	7	7	10.09. Hydrobius fuscipes	sb		1	1	3	2.2	6.38	16	167	0.8	1.7	0.5	0.32	36.5	25	1.7	0.036	99.2647	4.6174	2.26292	2.43296	29.3133	5.54611	40.1046	11.6808	4.04186	5.7085	94.2915	1.24667	2.09333	469.4	0.774993	469.4	0.774993	192.52	41.0141	112.95	24.0626	111.54
K01/6/C	K1	K1/6	C	river pocket water	river pocket water	river	2008	7	7	05.27. Laccophilus minutus	sb		1	1	3	2.2	6.38	16	167	0.8	1.7	0.5	0.32	36.5	25	1.7	0.036	99.2647	4.6174	2.26292	2.43296	29.3133	5.54611	40.1046	11.6808	4.04186	5.7085	94.2915	1.24667	2.09333	469.4	0.774993	469.4	0.774993	192.52	41.0141	112.95	24.0626	111.54
K01/6/C	K1	K1/6	C	river pocket water	river pocket water	river	2008	7	7	11.01. Hydraena riparia	rb		1	1	3	2.2	6.38	16	167	0.8	1.7	0.5	0.32	36.5	25	1.7	0.036	99.2647	4.6174	2.26292	2.43296	29.3133	5.54611	40.1046	11.6808	4.04186	5.7085	94.2915	1.24667	2.09333	469.4	0.774993	469.4	0.774993	192.52	41.0141	112.95	24.0626	111.54
K01/6/C	K1	K1/6	C	river pocket water	river pocket water	river	2008	7	7	06.01. Helophorus aquaticus	sb		1	1	3	2.2	6.38	16	167	0.8	1.7	0.5	0.32	36.5	25	1.7	0.036	99.2647	4.6174	2.26292	2.43296	29.3133	5.54611	40.1046	11.6808	4.04186	5.7085	94.2915	1.24667	2.09333	469.4	0.774993	469.4	0.774993	192.52	41.0141	112.95	24.0626	111.54
K01/6/B	K1	K1/6	B	river pocket water	river pocket water	river	2008	5	6	05.01. Agabus sp.	sb	1		1	1	3.7	8.6	16.6	123	1.5	0.4	0.1	0.06	9.9	170	3.3	0.0302	100	4.6174	2.26292	2.43296	29.3133	5.54611	40.1046	11.6808	4.04186	9.81807	90.1819	1.24667	2.04182	469.4	0.774993	469.4	0.774993	192.52	41.0141	112.95	24.0626	111.54
K01/6/B	K1	K1/6	B	river pocket water	river pocket water	river	2008	5	6	05.01. Agabus paludosus	re		1	1	1	3.7	8.6	16.6	123	1.5	0.4	0.1	0.06	9.9	170	3.3	0.0302	100	4.6174	2.26292	2.43296	29.3133	5.54611	40.1046	11.6808	4.04186	9.81807	90.1819	1.24667	2.04182	469.4	0.774993	469.4	0.774993	192.52	41.0141	112.95	24.0626	111.54
K01/6/B	K1	K1/6	B	river pocket water	river pocket water	river	2008	5	6	03.01. Noterus crassicornis	sb		1	1	1	3.7	8.6	16.6	123	1.5	0.4	0.1	0.06	9.9	170	3.3	0.0302	100	4.6174	2.26292	2.43296	29.3133	5.54611	40.1046	11.6808	4.04186	9.81807	90.1819	1.24667	2.04182	469.4	0.774993	469.4	0.774993	192.52	41.0141	112.95	24.0626	111.54
K01/6/B	K1	K1/6	B	river pocket water	river pocket water	river	2008	5	6	05.16. Hydroporus angustatus	sa		1	1	1	3.7	8.6	16.6	123	1.5	0.4	0.1	0.06	9.9	170	3.3	0.0302	100	4.6174	2.26292	2.43296	29.3133	5.54611	40.1046	11.6808	4.04186	9.81807	90.1819	1.24667	2.04182	469.4	0.774993	469.4	0.774993	192.52	41.0141	112.95	24.0626	111.54
K01/6/B	K1	K1/6	B	river pocket water	river pocket water	river	2008	5	6	05.24. Hygrotus decoratus	sa		2	2	1	3.7	8.6	16.6	123	1.5	0.4	0.1	0.06	9.9	170	3.3	0.0302	100	4.6174	2.26292	2.43296	29.3133	5.54611	40.1046	11.6808	4.04186	9.81807	90.1819	1.24667	2.04182	469.4	0.774993	469.4	0.774993	192.52	41.0141	112.95	24.0626	111.54
K01/6/B	K1	K1/6	B	river pocket water	river pocket water	river	2008	5	6	10.13. Laccobius minutus	sa		1	1	1	3.7	8.6	16.6	123	1.5	0.4	0.1	0.06	9.9	170	3.3	0.0302	100	4.6174	2.26292	2.43296	29.3133	5.54611	40.1046	11.6808	4.04186	9.81807	90.1819	1.24667	2.04182	469.4	0.774993	469.4	0.774993	192.52	41.0141	112.95	24.0626	111.54
K01/6/B	K1	K1/6	B	river pocket water	river pocket water	river	2008	5	6	10.01. Anacaena globulus	sb		1	1	1	3.7	8.6	16.6	123	1.5	0.4	0.1	0.06	9.9	170	3.3	0.0302	100	4.6174	2.26292	2.43296	29.3133	5.54611	40.1046	11.6808	4.04186	9.81807	90.1819	1.24667	2.04182	469.4	0.774993	469.4	0.774993	192.52	41.0141	112.95	24.0626	111.54
K01/6/B	K1	K1/6	B	river pocket water	river pocket water	river	2008	5	6	10.01. Anacaena limbata	sb		2	2	1	3.7	8.6	16.6	123	1.5	0.4	0.1	0.06	9.9	170	3.3	0.0302	100	4.6174	2.26292	2.43296	29.3133	5.54611	40.1046	11.6808	4.04186	9.81807	90.1819	1.24667	2.04182	469.4	0.774993	469.4	0.774993	192.52	41.0141	112.95	24.0626	111.54
K01/6/B	K1	K1/6	B	river pocket water	river pocket water	river	2008	5	6	05.16. Hydroporus palustris	sb		1	1	1	3.7	8.6	16.6	123	1.5	0.4	0.1	0.06	9.9	170	3.3	0.0302	100	4.6174	2.26292	2.43296	29.3133	5.54611	40.1046	11.6808	4.04186	9.81807	90.1819	1.24667	2.04182	469.4	0.774993	469.4	0.774993	192.52	41.0141	112.95	24.0626	111.54
K01/5/C	K1	K1/5	C	river current	river current	river	2008	7	7	05.04. Colymbetes fuscus	sb		1	1	0	8.4	6.38	16	167	0.8	1.7	0.5	0.32	36.5	25	1.7	0.1179	99.2647	0.411808	0.194336	0.286878	24.1764	15.3526	56.2558	2.35055	0.971682	4.53635	95.4637	2.12667	1.20303	469.4	0.774993	469.4	0.774993	192.52	41.0141	112.95	24.0626	111.54
K01/5/C	K1	K1/5	C	river current	river current	river	2008	7	7	05.01. Agabus bipustulatus	sb		39	39	0	8.4	6.38	16	167	0.8	1.7	0.5	0.32	36.5	25	1.7	0.1179	99.2647	0.411808	0.194336	0.286878	24.1764	15.3526	56.2558	2.35055	0.971682	4.53635	95.4637	2.12667	1.20303	469.4	0.774993	469.4	0.774993	192.52	41.0141	112.95	24.0626	111.54
K01/5/C	K1	K1/5	C	river current	river current	river	2008	7	7	10.09. Hydrobius fuscipes	sb		2	2	0	8.4	6.38	16	167	0.8	1.7	0.5	0.32	36.5	25	1.7	0.1179	99.2647	0.411808	0.194336	0.286878	24.1764	15.3526	56.2558	2.35055	0.971682	4.53635	95.4637	2.12667	1.20303	469.4	0.774993	469.4	0.774993	192.52	41.0141	112.95	24.0626	111.54
K01/5/C	K1	K1/5	C	river current	river current	river	2008	7	7	05.02. Ilybius fuliginosus	re		1	1	0	8.4	6.38	16	167	0.8	1.7	0.5	0.32	36.5	25	1.7	0.1179	99.2647	0.411808	0.194336	0.286878	24.1764	15.3526	56.2558	2.35055	0.971682	4.53635	95.4637	2.12667	1.20303	469.4	0.774993	469.4	0.774993	192.52	41.0141	112.95	24.0626	111.54
K01/5/C	K1	K1/5	C	river current	river current	river	2008	7	7	05.01. Agabus paludosus	re		1	1	0	8.4	6.38	16	167	0.8	1.7	0.5	0.32	36.5	25	1.7	0.1179	99.2647	0.411808	0.194336	0.286878	24.1764	15.3526	56.2558	2.35055	0.971682	4.53635	95.4637	2.12667	1.20303	469.4	0.774993	469.4	0.774993	192.52	41.0141	112.95	24.0626	111.54
K01/5/C	K1	K1/5	C	river current	river current	river	2008	7	7	11.01. Limnebius parvulus	sb		2	2	0	8.4	6.38	16	167	0.8	1.7	0.5	0.32	36.5	25	1.7	0.1179	99.2647	0.411808	0.194336	0.286878	24.1764	15.3526	56.2558	2.35055	0.971682	4.53635	95.4637	2.12667	1.20303	469.4	0.774993	469.4	0.774993	192.52	41.0141	112.95	24.0626	111.54
K01/5/C	K1	K1/5	C	river current	river current	river	2008	7	7	11.01. Limnebius crinifer	sb		1	1	0	8.4	6.38	16	167	0.8	1.7	0.5	0.32	36.5	25	1.7	0.1179	99.2647	0.411808	0.194336	0.286878	24.1764	15.3526	56.2558	2.35055	0.971682	4.53635	95.4637	2.12667	1.20303	469.4	0.774993	469.4	0.774993	192.52	41.0141	112.95	24.0626	111.54
K01/5/C	K1	K1/5	C	river current	river current	river	2008	7	7	10.13. Laccobius minutus	sa		2	2	0	8.4	6.38	16	167	0.8	1.7	0.5	0.32	36.5	25	1.7	0.1179	99.2647	0.411808	0.194336	0.286878	24.1764	15.3526	56.2558	2.35055	0.971682	4.53635	95.4637	2.12667	1.20303	469.4	0.774993	469.4	0.774993	192.52	41.0141	112.95	24.0626	111.54
K01/5/C	K1	K1/5	C	river current	river current	river	2008	7	7	11.01. Hydraena palustris	sa		1	1	0	8.4	6.38	16	167	0.8	1.7	0.5	0.32	36.5	25	1.7	0.1179	99.2647	0.411808	0.194336	0.286878	24.1764	15.3526	56.2558	2.35055	0.971682	4.53635	95.4637	2.12667	1.20303	469.4	0.774993	469.4	0.774993	192.52	41.0141	112.95	24.0626	111.54
K01/5/C	K1	K1/5	C	river current	river current	river	2008	7	7	05.16. Hydroporus palustris	sb		1	1	0	8.4	6.38	16	167	0.8	1.7	0.5	0.32	36.5	25	1.7	0.1179	99.2647	0.411808	0.194336	0.286878	24.1764	15.3526	56.2558	2.35055	0.971682	4.53635	95.4637	2.12667	1.20303	469.4	0.774993	469.4	0.774993	192.52	41.0141	112.95	24.0626	111.54
K01/5/C	K1	K1/5	C	river current	river current	river	2008	7	7	06.01. Helophorus flavipes	sa		1	1	0	8.4	6.38	16	167	0.8	1.7	0.5	0.32	36.5	25	1.7	0.1179	99.2647	0.411808	0.194336	0.286878	24.1764	15.3526	56.2558	2.35055	0.971682	4.53635	95.4637	2.12667	1.20303	469.4	0.774993	469.4	0.774993	192.52	41.0141	112.95	24.0626	111.54
K01/5/C	K1	K1/5	C	river current	river current	river	2008	7	7	06.01. Helophorus minutus	sa		1	1	0	8.4	6.38	16	167	0.8	1.7	0.5	0.32	36.5	25	1.7	0.1179	99.2647	0.411808	0.194336	0.286878	24.1764	15.3526	56.2558	2.35055	0.971682	4.53635	95.4637	2.12667	1.20303	469.4	0.774993	469.4	0.774993	192.52	41.0141	112.95	24.0626	111.54
K01/1/C	K1	K1/1	C	river current	limnocrene	river	2008	10	13	05.01. Agabus bipustulatus	sb		1	1	2	5.5	6.82	10.7	67	0.1	1.8	0.1	0	6.4	172	5.1	0.0229	100	1.68994	0.684671	1.35304	22.643	8.15084	54.6052	7.0532	3.82003	9.87706	90.1229	2.12667	1.3303	469.4	0.774993	469.4	0.774993	192.52	41.0141	112.95	24.0626	111.54
K01/1/C	K1	K1/1	C	river current	limnocrene	river	2008	10	13	11.01. Limnebius parvulus	sb		1	1	2	5.5	6.82	10.7	67	0.1	1.8	0.1	0	6.4	172	5.1	0.0229	100	1.68994	0.684671	1.35304	22.643	8.15084	54.6052	7.0532	3.82003	9.87706	90.1229	2.12667	1.3303	469.4	0.774993	469.4	0.774993	192.52	41.0141	112.95	24.0626	111.54
K01/8/C	K1	K1/8	C	river current	river current	river	2008	4	14	14.02. Elodes sp.	re	2		2	0	11.2	6.7	7.7	261	0.3	0.4	0.4	0.01	33	143	4.7	0.2387	30	2.66971	0.987574	1.13951	24.0002	8.26415	52.3034	7.21689	3.41853	10.8186	89.1814	1.24667	1.9903	469.4	0.774993	469.4	0.774993	192.52	41.0141	112.95	24.0626	111.54
K01/8/C	K1	K1/8	C	river current	river current	river	2008	4	14	05.01. Agabus paludosus	re		1	1	0	11.2	6.7	7.7	261	0.3	0.4	0.4	0.01	33	143	4.7	0.2387	30	2.66971	0.987574	1.13951	24.0002	8.26415	52.3034	7.21689	3.41853	10.8186	89.1814	1.24667	1.9903	469.4	0.774993	469.4	0.774993	192.52	41.0141	112.95	24.0626	111.54
K01/1/B	K1	K1/1	B	river current	small limnocrene	river	2008	8	5	05.01. Agabus bipustulatus	sb		2	2	2	8.9	7.27	16.9	158	1.8	1.7	1	0.16	5.2	202	0.8	0.0092	100	1.1842	0.87631	1.36775	37.409	7.82758	42.9096	7.31245	1.11315	9.50649	90.4935	1.24667	1.9903	469.4	0.774993	469.4	0.774993	192.52	41.0141	112.95	24.0626	111.54
K01/1/B	K1	K1/1	B	river current	small limnocrene	river	2008	8	5	10.01. Anacaena lutescens	sa		1	1	2	8.9	7.27	16.9	158	1.8	1.7	1	0.16	5.2	202	0.8	0.0092	100	1.1842	0.87631	1.36775	37.409	7.82758	42.9096	7.31245	1.11315	9.50649	90.4935	1.24667	1.9903	469.4	0.774993	469.4	0.774993	192.52	41.0141	112.95	24.0626	111.54
K01/1/B	K1	K1/1	B	river current	small limnocrene	river	2008	8	5	06.01. Helophorus griseus	sa		1	1	2	8.9	7.27	16.9	158	1.8	1.7	1	0.16	5.2	202	0.8	0.0092	100	1.1842	0.87631	1.36775	37.409	7.82758	42.9096	7.31245	1.11315	9.50649	90.4935	1.24667	1.9903	469.4	0.774993	469.4	0.774993	192.52	41.0141	112.95	24.0626	111.54
K01/1/B	K1	K1/1	B	river current	small limnocrene	river	2008	8	5	11.03. Ochthebius minimus	sb		4	4	2	8.9	7.27	16.9	158	1.8	1.7	1	0.16	5.2	202	0.8	0.0092	100	1.1842	0.87631	1.36775	37.409	7.82758	42.9096	7.31245	1.11315	9.50649	90.4935	1.24667	1.9903	469.4	0.774993	469.4	0.774993	192.52	41.0141	112.95	24.0626	111.54
K01/5/B	K1	K1/5	B	river current	river current, sand	river	2008	7	7	10.11. Hydrochara caraboides	sb		1	1	0	8.4	6.38	16	167	0.8	1.7	0.5	0.32	36.5	25	1.7	0.1179	99.2647	0.411808	0.194336	0.286878	24.1764	15.3526	56.2558	2.35055	0.971682	4.53635	95.4637	2.12667	1.20303	469.4	0.774993	469.4	0.774993	192.52	41.0141	112.95	24.0626	111.54
K01/5/B	K1	K1/5	B	river current	river current, sand	river	2008	7	7	05.02. Ilybius fuliginosus	re		1	1	0	8.4	6.38	16	167	0.8	1.7	0.5	0.32	36.5	25	1.7	0.1179	99.2647	0.411808	0.194336	0.286878	24.1764	15.3526	56.2558	2.35055	0.971682	4.53635	95.4637	2.12667	1.20303	469.4	0.774993	469.4	0.774993	192.52	41.0141	112.95	24.0626	111.54
K01/5/B	K1	K1/5	B	river current	river current, sand	river	2008	7	7	10.09. Hydrobius fuscipes	sb		1	1	0	8.4	6.38	16	167	0.8	1.7	0.5	0.32	36.5	25	1.7	0.1179	99.2647	0.411808	0.194336	0.286878	24.1764	15.3526	56.2558	2.35055	0.971682	4.53635	95.4637	2.12667	1.20303	469.4	0.774993	469.4	0.774993	192.52	41.0141	112.95	24.0626	111.54
K01/5/B	K1	K1/5	B	river current	river current, sand	river	2008	7	7	05.01. Agabus bipustulatus	sb		20	20	0	8.4	6.38	16	167	0.8	1.7	0.5	0.32	36.5	25	1.7	0.1179	99.2647	0.411808	0.194336	0.286878	24.1764	15.3526	56.2558	2.35055	0.971682	4.53635	95.4637	2.12667	1.20303	469.4	0.774993	469.4	0.774993	192.52	41.0141	112.95	24.0626	111.54
K01/5/B	K1	K1/5	B	river current	river current, sand	river	2008	7	7	10.13. Laccobius bipunctatus	sa		2	2	0	8.4	6.38	16	167	0.8	1.7	0.5	0.32	36.5	25	1.7	0.1179	99.2647	0.411808	0.194336	0.286878	24.1764	15.3526	56.2558	2.35055	0.971682	4.53635	95.4637	2.12667	1.20303	469.4	0.774993	469.4	0.774993	192.52	41.0141	112.95	24.0626	111.54
K01/5/B	K1	K1/5	B	river current	river current, sand	river	2008	7	7	10.01. Anacaena globulus	sb		2	2	0	8.4	6.38	16	167	0.8	1.7	0.5	0.32	36.5	25	1.7	0.1179	99.2647	0.411808	0.194336	0.286878	24.1764	15.3526	56.2558	2.35055	0.971682	4.53635	95.4637	2.12667	1.20303	469.4	0.774993	469.4	0.774993	192.52	41.0141	112.95	24.0626	111.54
K01/1/B	K1	K1/1	B	river current	limnocrene	river	2008	6	2	10.09. Hydrobius fuscipes	sb		1	1	2	8.1	7.08	19.4	154	1.3	0.6	0.1	0.01	6.88	133	3.2	0.0015	100	1.1842	0.87631	1.36775	37.409	7.82758	42.9096	7.31245	1.11315	8.9727	91.0273	1.24667	1.86303	469.4	0.774993	469.4	0.774993	192.52	41.0141	112.95	24.0626	111.54
K01/1/B	K1	K1/1	B	river current	limnocrene	river	2008	6	2	05.04. Colymbetes striatus	sa	1		1	2	8.1	7.08	19.4	154	1.3	0.6	0.1	0.01	6.88	133	3.2	0.0015	100	1.1842	0.87631	1.36775	37.409	7.82758	42.9096	7.31245	1.11315	8.9727	91.0273	1.24667	1.86303	469.4	0.774993	469.4	0.774993	192.52	41.0141	112.95	24.0626	111.54
K01/1/B	K1	K1/1	B	river current	limnocrene	river	2008	6	2	05.27. Laccophilus minutus	sb		1	1	2	8.1	7.08	19.4	154	1.3	0.6	0.1	0.01	6.88	133	3.2	0.0015	100	1.1842	0.87631	1.36775	37.409	7.82758	42.9096	7.31245	1.11315	8.9727	91.0273	1.24667	1.86303	469.4	0.774993	469.4	0.774993	192.52	41.0141	112.95	24.0626	111.54
K01/1/B	K1	K1/1	B	river current	limnocrene	river	2008	6	2	03.01. Noterus clavicornis	sb		2	2	2	8.1	7.08	19.4	154	1.3	0.6	0.1	0.01	6.88	133	3.2	0.0015	100	1.1842	0.87631	1.36775	37.409	7.82758	42.9096	7.31245	1.11315	8.9727	91.0273	1.24667	1.86303	469.4	0.774993	469.4	0.774993	192.52	41.0141	112.95	24.0626	111.54
K01/1/B	K1	K1/1	B	river current	limnocrene	river	2008	6	2	05.01. Agabus uliginosus	sb		2	2	2	8.1	7.08	19.4	154	1.3	0.6	0.1	0.01	6.88	133	3.2	0.0015	100	1.1842	0.87631	1.36775	37.409	7.82758	42.9096	7.31245	1.11315	8.9727	91.0273	1.24667	1.86303	469.4	0.774993	469.4	0.774993	192.52	41.0141	112.95	24.0626	111.54
K01/1/B	K1	K1/1	B	river current	limnocrene	river	2008	6	2	05.16. Hydroporus planus	sa		1	1	2	8.1	7.08	19.4	154	1.3	0.6	0.1	0.01	6.88	133	3.2	0.0015	100	1.1842	0.87631	1.36775	37.409	7.82758	42.9096	7.31245	1.11315	8.9727	91.0273	1.24667	1.86303	469.4	0.774993	469.4	0.774993	192.52	41.0141	112.95	24.0626	111.54
K01/1/B	K1	K1/1	B	river current	limnocrene	river	2008	6	2	10.08. Helochares obscurus	sb		1	1	2	8.1	7.08	19.4	154	1.3	0.6	0.1	0.01	6.88	133	3.2	0.0015	100	1.1842	0.87631	1.36775	37.409	7.82758	42.9096	7.31245	1.11315	8.9727	91.0273	1.24667	1.86303	469.4	0.774993	469.4	0.774993	192.52	41.0141	112.95	24.0626	111.54
K01/5/B	K1	K1/5	B	river current	river current, sand	river	2008	6	2	05.01. Agabus sturmii	sb		1	1	0	8.9	6.5	20.4	154	0.8	1.6	0.2	0.12	29	219	2.7	0.1649	100	0.411808	0.194336	0.286878	24.1764	15.3526	56.2558	2.35055	0.971682	2.42941	97.5706	2.12667	1.20303	469.4	0.774993	469.4	0.774993	192.52	41.0141	112.95	24.0626	111.54
K01/5/B	K1	K1/5	B	river current	river current, sand	river	2008	6	2	06.01. Helophorus griseus	sa		1	1	0	8.9	6.5	20.4	154	0.8	1.6	0.2	0.12	29	219	2.7	0.1649	100	0.411808	0.194336	0.286878	24.1764	15.3526	56.2558	2.35055	0.971682	2.42941	97.5706	2.12667	1.20303	469.4	0.774993	469.4	0.774993	192.52	41.0141	112.95	24.0626	111.54
K01/9/A	K1	K1/9	A	river pocket water	river pocket water	river	2008	8	5	05.01. Agabus bipustulatus	sb		5	5	0	7.5	7.27	17.4	162.1	1.4	2.2	0.9	0.15	12.1	158	3.3	0.0072	0.378378	20.7781	4.63851	3.43467	28.8104	8.95736	29.0893	2.23764	2.054	3.84203	96.158	1.54667	1.33303	469.4	0.774993	469.4	0.774993	192.52	41.0141	112.95	24.0626	111.54
K01/9/A	K1	K1/9	A	river pocket water	river pocket water	river	2008	8	5	10.01. Anacaena globulus	sb		1	1	0	7.5	7.27	17.4	162.1	1.4	2.2	0.9	0.15	12.1	158	3.3	0.0072	0.378378	20.7781	4.63851	3.43467	28.8104	8.95736	29.0893	2.23764	2.054	3.84203	96.158	1.54667	1.33303	469.4	0.774993	469.4	0.774993	192.52	41.0141	112.95	24.0626	111.54
K01/9/A	K1	K1/9	A	river pocket water	river pocket water	river	2008	8	5	10.09. Hydrobius fuscipes	sb		1	1	0	7.5	7.27	17.4	162.1	1.4	2.2	0.9	0.15	12.1	158	3.3	0.0072	0.378378	20.7781	4.63851	3.43467	28.8104	8.95736	29.0893	2.23764	2.054	3.84203	96.158	1.54667	1.33303	469.4	0.774993	469.4	0.774993	192.52	41.0141	112.95	24.0626	111.54
K01/6/C	K1	K1/6	C	river pocket water	river pocket, meadow	river	2008	10	13	05.01. Agabus bipustulatus	sb		1	1	3	2.3	7.01	10.1	148.2	0.5	1.9	0.2	0	25	178	3.2	0.0082	109.444	0.296703	0.626994	0.839725	29.8942	9.59525	54.2742	3.16856	1.30437	8.9222	91.0778	1.24667	1.86303	469.4	0.774993	469.4	0.774993	192.52	41.0141	112.95	24.0626	111.54
K01/6/C	K1	K1/6	C	river pocket water	river pocket, meadow	river	2008	10	13	14.02. Elodes sp.	re	1		1	3	2.3	7.01	10.1	148.2	0.5	1.9	0.2	0	25	178	3.2	0.0082	109.444	0.296703	0.626994	0.839725	29.8942	9.59525	54.2742	3.16856	1.30437	8.9222	91.0778	1.24667	1.86303	469.4	0.774993	469.4	0.774993	192.52	41.0141	112.95	24.0626	111.54
K01/6/C	K1	K1/6	C	river pocket water	river pocket, meadow	river	2008	10	13	10.13. Laccobius minutus	sa		1	1	3	2.3	7.01	10.1	148.2	0.5	1.9	0.2	0	25	178	3.2	0.0082	109.444	0.296703	0.626994	0.839725	29.8942	9.59525	54.2742	3.16856	1.30437	8.9222	91.0778	1.24667	1.86303	469.4	0.774993	469.4	0.774993	192.52	41.0141	112.95	24.0626	111.54
K01/6/C	K1	K1/6	C	river pocket water	river pocket, meadow	river	2008	10	13	05.02. Ilybius sp.	sa	1		1	3	2.3	7.01	10.1	148.2	0.5	1.9	0.2	0	25	178	3.2	0.0082	109.444	0.296703	0.626994	0.839725	29.8942	9.59525	54.2742	3.16856	1.30437	8.9222	91.0778	1.24667	1.86303	469.4	0.774993	469.4	0.774993	192.52	41.0141	112.95	24.0626	111.54
K01/8/A	K1	K1/8	A	river current	river current	river	2008	8	5	05.01. Agabus bipustulatus	sb		1	1	0	7.5	7.27	17.4	162.1	1.4	2.2	0.9	0.15	12.1	158	3.3	0.6646	0.378378	2.66971	0.987574	1.13951	24.0002	8.26415	52.3034	7.21689	3.41853	9.70871	90.2913	1.24667	1.9903	469.4	0.774993	469.4	0.774993	192.52	41.0141	112.95	24.0626	111.54
K01/8/A	K1	K1/8	A	river current	river current	river	2008	8	5	05.01. Agabus paludosus	re		1	1	0	7.5	7.27	17.4	162.1	1.4	2.2	0.9	0.15	12.1	158	3.3	0.6646	0.378378	2.66971	0.987574	1.13951	24.0002	8.26415	52.3034	7.21689	3.41853	9.70871	90.2913	1.24667	1.9903	469.4	0.774993	469.4	0.774993	192.52	41.0141	112.95	24.0626	111.54
K01/8/A	K1	K1/8	A	river current	river current	river	2008	8	5	10.01. Anacaena limbata	sb		1	1	0	7.5	7.27	17.4	162.1	1.4	2.2	0.9	0.15	12.1	158	3.3	0.6646	0.378378	2.66971	0.987574	1.13951	24.0002	8.26415	52.3034	7.21689	3.41853	9.70871	90.2913	1.24667	1.9903	469.4	0.774993	469.4	0.774993	192.52	41.0141	112.95	24.0626	111.54
K01/1/C	K1	K1/1	C	river current	limnocrene	river	2008	5	6	05.27. Laccophilus minutus	sb		1	1	1	6	7.9	16.7	123	1.3	0.4	0.1	0.04	6	80	4.4	0.0009	100	1.1842	0.87631	1.36775	37.409	7.82758	42.9096	7.31245	1.11315	6.04905	93.951	1.24667	1.9903	469.4	0.774993	469.4	0.774993	192.52	41.0141	112.95	24.0626	111.54
K01/6/A	K1	K1/6	A	river pocket water	river pocket, meadow	river	2008	10	13	05.01. Agabus bipustulatus	sb		4	4	3	2.3	7.01	10.1	148.2	0.5	1.9	0.2	0	25	178	3.2	0.0082	109.444	0.296703	0.626994	0.839725	29.8942	9.59525	54.2742	3.16856	1.30437	8.9222	91.0778	1.24667	1.86303	469.4	0.774993	469.4	0.774993	192.52	41.0141	112.95	24.0626	111.54
K01/6/A	K1	K1/6	A	river pocket water	river pocket, meadow	river	2008	10	13	05.02. Ilybius fuliginosus	re		1	1	3	2.3	7.01	10.1	148.2	0.5	1.9	0.2	0	25	178	3.2	0.0082	109.444	0.296703	0.626994	0.839725	29.8942	9.59525	54.2742	3.16856	1.30437	8.9222	91.0778	1.24667	1.86303	469.4	0.774993	469.4	0.774993	192.52	41.0141	112.95	24.0626	111.54
K01/6/A	K1	K1/6	A	river pocket water	river pocket, meadow	river	2008	10	13	05.27. Laccophilus minutus	sb		3	3	3	2.3	7.01	10.1	148.2	0.5	1.9	0.2	0	25	178	3.2	0.0082	109.444	0.296703	0.626994	0.839725	29.8942	9.59525	54.2742	3.16856	1.30437	8.9222	91.0778	1.24667	1.86303	469.4	0.774993	469.4	0.774993	192.52	41.0141	112.95	24.0626	111.54
K01/6/A	K1	K1/6	A	river pocket water	river pocket, meadow	river	2008	10	13	05.16. Hydroporus angustatus	sa		1	1	3	2.3	7.01	10.1	148.2	0.5	1.9	0.2	0	25	178	3.2	0.0082	109.444	0.296703	0.626994	0.839725	29.8942	9.59525	54.2742	3.16856	1.30437	8.9222	91.0778	1.24667	1.86303	469.4	0.774993	469.4	0.774993	192.52	41.0141	112.95	24.0626	111.54
K01/6/A	K1	K1/6	A	river pocket water	river pocket, meadow	river	2008	10	13	10.13. Laccobius minutus	sa		2	2	3	2.3	7.01	10.1	148.2	0.5	1.9	0.2	0	25	178	3.2	0.0082	109.444	0.296703	0.626994	0.839725	29.8942	9.59525	54.2742	3.16856	1.30437	8.9222	91.0778	1.24667	1.86303	469.4	0.774993	469.4	0.774993	192.52	41.0141	112.95	24.0626	111.54
K01/6/A	K1	K1/6	A	river pocket water	river pocket, meadow	river	2008	10	13	10.01. Anacaena limbata	sb		1	1	3	2.3	7.01	10.1	148.2	0.5	1.9	0.2	0	25	178	3.2	0.0082	109.444	0.296703	0.626994	0.839725	29.8942	9.59525	54.2742	3.16856	1.30437	8.9222	91.0778	1.24667	1.86303	469.4	0.774993	469.4	0.774993	192.52	41.0141	112.95	24.0626	111.54
K01/6/A	K1	K1/6	A	river pocket water	river pocket, meadow	river	2008	10	13	10.01. Anacaena lutescens	sa		1	1	3	2.3	7.01	10.1	148.2	0.5	1.9	0.2	0	25	178	3.2	0.0082	109.444	0.296703	0.626994	0.839725	29.8942	9.59525	54.2742	3.16856	1.30437	8.9222	91.0778	1.24667	1.86303	469.4	0.774993	469.4	0.774993	192.52	41.0141	112.95	24.0626	111.54
K01/6/A	K1	K1/6	A	river pocket water	river pocket, meadow	river	2008	10	13	05.16. Hydroporus palustris	sb		3	3	3	2.3	7.01	10.1	148.2	0.5	1.9	0.2	0	25	178	3.2	0.0082	109.444	0.296703	0.626994	0.839725	29.8942	9.59525	54.2742	3.16856	1.30437	8.9222	91.0778	1.24667	1.86303	469.4	0.774993	469.4	0.774993	192.52	41.0141	112.95	24.0626	111.54
K01/6/A	K1	K1/6	A	river pocket water	river pocket, meadow	river	2008	10	13	05.16. Hydroporus incognitus	sa		2	2	3	2.3	7.01	10.1	148.2	0.5	1.9	0.2	0	25	178	3.2	0.0082	109.444	0.296703	0.626994	0.839725	29.8942	9.59525	54.2742	3.16856	1.30437	8.9222	91.0778	1.24667	1.86303	469.4	0.774993	469.4	0.774993	192.52	41.0141	112.95	24.0626	111.54
K01/5/B	K1	K1/5	B	river current	river current	river	2008	8	5	05.02. Ilybius fenestratus	re		4	4	0
K01/5/B	K1	K1/5	B	river current	river current	river	2008	8	5	05.01. Agabus bipustulatus	sb		15	15	0
K01/5/B	K1	K1/5	B	river current	river current	river	2008	8	5	05.27. Laccophilus minutus	sb		2	2	0
K01/5/B	K1	K1/5	B	river current	river current	river	2008	8	5	05.16. Hydroporus angustatus	sa		1	1	0
K01/5/B	K1	K1/5	B	river current	river current	river	2008	8	5	05.16. Hydroporus palustris	sb		2	2	0
K01/1/B	K1	K1/1	B	river current	limnocrene	river	2008	9	10	03.01. Noterus clavicornis	sb		4	4	2	1.1	6.75	13.4	151.1	0.4	2.4	0.1	0.1	9.5	194	2.1	0.0173	100	1.1842	0.87631	1.36775	37.409	7.82758	42.9096	7.31245	1.11315	7.47773	92.5223	1.24667	1.9903	469.4	0.774993	469.4	0.774993	192.52	41.0141	112.95	24.0626	111.54
K01/1/B	K1	K1/1	B	river current	limnocrene	river	2008	9	10	06.01. Helophorus griseus	sa		1	1	2	1.1	6.75	13.4	151.1	0.4	2.4	0.1	0.1	9.5	194	2.1	0.0173	100	1.1842	0.87631	1.36775	37.409	7.82758	42.9096	7.31245	1.11315	7.47773	92.5223	1.24667	1.9903	469.4	0.774993	469.4	0.774993	192.52	41.0141	112.95	24.0626	111.54
K01/8/B	K1	K1/8	B	river current	river current	river	2008	4	14	05.24. Hygrotus decoratus	sa		1	1	0	11.2	6.7	7.7	261	0.3	0.4	0.4	0.01	33	143	4.7	0.2387	30	2.66971	0.987574	1.13951	24.0002	8.26415	52.3034	7.21689	3.41853	10.8186	89.1814	1.24667	1.9903	469.4	0.774993	469.4	0.774993	192.52	41.0141	112.95	24.0626	111.54
K01/8/B	K1	K1/8	B	river current	river current	river	2008	4	14	05.01. Agabus paludosus	re		1	1	0	11.2	6.7	7.7	261	0.3	0.4	0.4	0.01	33	143	4.7	0.2387	30	2.66971	0.987574	1.13951	24.0002	8.26415	52.3034	7.21689	3.41853	10.8186	89.1814	1.24667	1.9903	469.4	0.774993	469.4	0.774993	192.52	41.0141	112.95	24.0626	111.54
K01/5/A	K1	K1/5	A	river current	river current	river	2008	8	5	05.01. Agabus bipustulatus	sb		6	6	0	9.4	7.03	17.1	159.3	1.2	2.4	0.9	0.13	9.1	178	1.3	0.0872	100	0.411808	0.194336	0.286878	24.1764	15.3526	56.2558	2.35055	0.971682	1.53559	98.4644	2.12667	1.20303	469.4	0.774993	469.4	0.774993	192.52	41.0141	112.95	24.0626	111.54
K01/5/A	K1	K1/5	A	river current	river current	river	2008	8	5	05.02. Ilybius fuliginosus	re		2	2	0	9.4	7.03	17.1	159.3	1.2	2.4	0.9	0.13	9.1	178	1.3	0.0872	100	0.411808	0.194336	0.286878	24.1764	15.3526	56.2558	2.35055	0.971682	1.53559	98.4644	2.12667	1.20303	469.4	0.774993	469.4	0.774993	192.52	41.0141	112.95	24.0626	111.54
K01/5/A	K1	K1/5	A	river current	river current	river	2008	8	5	10.09. Hydrobius fuscipes	sb		1	1	0	9.4	7.03	17.1	159.3	1.2	2.4	0.9	0.13	9.1	178	1.3	0.0872	100	0.411808	0.194336	0.286878	24.1764	15.3526	56.2558	2.35055	0.971682	1.53559	98.4644	2.12667	1.20303	469.4	0.774993	469.4	0.774993	192.52	41.0141	112.95	24.0626	111.54
K01/5/A	K1	K1/5	A	river current	river current	river	2008	8	5	10.13. Laccobius minutus	sa		3	3	0	9.4	7.03	17.1	159.3	1.2	2.4	0.9	0.13	9.1	178	1.3	0.0872	100	0.411808	0.194336	0.286878	24.1764	15.3526	56.2558	2.35055	0.971682	1.53559	98.4644	2.12667	1.20303	469.4	0.774993	469.4	0.774993	192.52	41.0141	112.95	24.0626	111.54
K01/5/A	K1	K1/5	A	river current	river current	river	2008	8	5	10.01. Anacaena globulus	sb		1	1	0	9.4	7.03	17.1	159.3	1.2	2.4	0.9	0.13	9.1	178	1.3	0.0872	100	0.411808	0.194336	0.286878	24.1764	15.3526	56.2558	2.35055	0.971682	1.53559	98.4644	2.12667	1.20303	469.4	0.774993	469.4	0.774993	192.52	41.0141	112.95	24.0626	111.54
K01/5/A	K1	K1/5	A	river current	river current	river	2008	8	5	11.01. Hydraena palustris	sa		1	1	0	9.4	7.03	17.1	159.3	1.2	2.4	0.9	0.13	9.1	178	1.3	0.0872	100	0.411808	0.194336	0.286878	24.1764	15.3526	56.2558	2.35055	0.971682	1.53559	98.4644	2.12667	1.20303	469.4	0.774993	469.4	0.774993	192.52	41.0141	112.95	24.0626	111.54
K01/5/A	K1	K1/5	A	river current	river current	river	2008	8	5	10.01. Anacaena lutescens	sa		1	1	0	9.4	7.03	17.1	159.3	1.2	2.4	0.9	0.13	9.1	178	1.3	0.0872	100	0.411808	0.194336	0.286878	24.1764	15.3526	56.2558	2.35055	0.971682	1.53559	98.4644	2.12667	1.20303	469.4	0.774993	469.4	0.774993	192.52	41.0141	112.95	24.0626	111.54
K01/5/A	K1	K1/5	A	river current	river current	river	2008	8	5	05.16. Hydroporus angustatus	sa		1	1	0	9.4	7.03	17.1	159.3	1.2	2.4	0.9	0.13	9.1	178	1.3	0.0872	100	0.411808	0.194336	0.286878	24.1764	15.3526	56.2558	2.35055	0.971682	1.53559	98.4644	2.12667	1.20303	469.4	0.774993	469.4	0.774993	192.52	41.0141	112.95	24.0626	111.54
K01/5/A	K1	K1/5	A	river current	river current	river	2008	8	5	02.02. Haliplus fluviatilis	re		2	2	0	9.4	7.03	17.1	159.3	1.2	2.4	0.9	0.13	9.1	178	1.3	0.0872	100	0.411808	0.194336	0.286878	24.1764	15.3526	56.2558	2.35055	0.971682	1.53559	98.4644	2.12667	1.20303	469.4	0.774993	469.4	0.774993	192.52	41.0141	112.95	24.0626	111.54
K01/8/A	K1	K1/8	A	river current	river current, stones	river	2008	6	2	11.01. Hydraena palustris	sa		1	1	0	9.2	6.85	18.7	154	0.5	0.4	0.1	0.01	14.48	213	4.2	0.1743	8.45	2.66971	0.987574	1.13951	24.0002	8.26415	52.3034	7.21689	3.41853	9.70871	90.2913	1.24667	1.9903	469.4	0.774993	469.4	0.774993	192.52	41.0141	112.95	24.0626	111.54
K01/1/A	K1	K1/1	A	river current	limnocrene	river	2008	6	2	05.01. Agabus bipustulatus	sb		8	8	2	8.1	7.08	19.4	154	1.3	0.6	0.1	0.01	6.88	133	3.2	0.0015	100	1.1842	0.87631	1.36775	37.409	7.82758	42.9096	7.31245	1.11315	8.9727	91.0273	1.24667	1.86303	469.4	0.774993	469.4	0.774993	192.52	41.0141	112.95	24.0626	111.54
K01/1/A	K1	K1/1	A	river current	limnocrene	river	2008	6	2	05.01. Agabus paludosus	re		1	1	2	8.1	7.08	19.4	154	1.3	0.6	0.1	0.01	6.88	133	3.2	0.0015	100	1.1842	0.87631	1.36775	37.409	7.82758	42.9096	7.31245	1.11315	8.9727	91.0273	1.24667	1.86303	469.4	0.774993	469.4	0.774993	192.52	41.0141	112.95	24.0626	111.54
K01/1/B	K1	K1/1	B	river current	limnocrene	river	2008	9	10	05.02. Ilybius sp.	sa	1		1	2	1.1	6.75	13.4	151.1	0.4	2.4	0.1	0.1	9.5	194	2.1	0.0173	100	1.1842	0.87631	1.36775	37.409	7.82758	42.9096	7.31245	1.11315	7.47773	92.5223	1.24667	1.9903	469.4	0.774993	469.4	0.774993	192.52	41.0141	112.95	24.0626	111.54
K01/9/B	K1	K1/9	B	river pocket water	river pocket, wetlands	river	2008	9	10	05.01. Agabus bipustulatus	sb		1	1	0	1.5	6.18	18.2	156.6	0.2	1.4	0.3	0.08	100	61	3.1	0.0008	4.73773	20.7781	4.63851	3.43467	28.8104	8.95736	29.0893	2.23764	2.054	4.03115	95.9689	1.54667	1.33303	469.4	0.774993	469.4	0.774993	192.52	41.0141	112.95	24.0626	111.54
K01/9/B	K1	K1/9	B	river pocket water	river pocket, wetlands	river	2008	9	10	14.02. Elodes sp.	re	3		3	0	1.5	6.18	18.2	156.6	0.2	1.4	0.3	0.08	100	61	3.1	0.0008	4.73773	20.7781	4.63851	3.43467	28.8104	8.95736	29.0893	2.23764	2.054	4.03115	95.9689	1.54667	1.33303	469.4	0.774993	469.4	0.774993	192.52	41.0141	112.95	24.0626	111.54
K01/9/B	K1	K1/9	B	river pocket water	river pocket, wetlands	river	2008	9	10	10.01. Anacaena lutescens	sa		1	1	0	1.5	6.18	18.2	156.6	0.2	1.4	0.3	0.08	100	61	3.1	0.0008	4.73773	20.7781	4.63851	3.43467	28.8104	8.95736	29.0893	2.23764	2.054	4.03115	95.9689	1.54667	1.33303	469.4	0.774993	469.4	0.774993	192.52	41.0141	112.95	24.0626	111.54
K01/9/B	K1	K1/9	B	river pocket water	river pocket water	river	2008	5	6	05.01. Agabus paludosus	re		1	1	0	4.2	7.6	16.1	123	2.7	0.4	0.1	0.01	6.8	69	4.7	0.0089	25.5814	20.7781	4.63851	3.43467	28.8104	8.95736	29.0893	2.23764	2.054	9.88161	90.1184	1.54667	1.33303	469.4	0.774993	469.4	0.774993	192.52	41.0141	112.95	24.0626	111.54
K01/9/B	K1	K1/9	B	river pocket water	river pocket water	river	2008	5	6	05.27. Laccophilus sp.	sb	1		1	0	4.2	7.6	16.1	123	2.7	0.4	0.1	0.01	6.8	69	4.7	0.0089	25.5814	20.7781	4.63851	3.43467	28.8104	8.95736	29.0893	2.23764	2.054	9.88161	90.1184	1.54667	1.33303	469.4	0.774993	469.4	0.774993	192.52	41.0141	112.95	24.0626	111.54
K01/1/A	K1	K1/1	A	river current	limnocrene	river	2008	4	14	10.09. Hydrobius fuscipes	sb		10	10	1	8.7	5.5	12.1	256	0.3	0.4	0.4	0.01	33	143	4.8	0.0009	100	1.1842	0.87631	1.36775	37.409	7.82758	42.9096	7.31245	1.11315	5.71329	94.2867	1.24667	1.9903	469.4	0.774993	469.4	0.774993	192.52	41.0141	112.95	24.0626	111.54
K01/1/A	K1	K1/1	A	river current	limnocrene	river	2008	4	14	05.05. Rhantus frontalis	sb		1	1	1	8.7	5.5	12.1	256	0.3	0.4	0.4	0.01	33	143	4.8	0.0009	100	1.1842	0.87631	1.36775	37.409	7.82758	42.9096	7.31245	1.11315	5.71329	94.2867	1.24667	1.9903	469.4	0.774993	469.4	0.774993	192.52	41.0141	112.95	24.0626	111.54
K01/1/A	K1	K1/1	A	river current	limnocrene	river	2008	4	14	05.24. Hygrotus impressopunctatus	sb		1	1	1	8.7	5.5	12.1	256	0.3	0.4	0.4	0.01	33	143	4.8	0.0009	100	1.1842	0.87631	1.36775	37.409	7.82758	42.9096	7.31245	1.11315	5.71329	94.2867	1.24667	1.9903	469.4	0.774993	469.4	0.774993	192.52	41.0141	112.95	24.0626	111.54
K01/1/A	K1	K1/1	A	river current	limnocrene	river	2008	4	14	05.19. Porhydrus lineatus	sa		1	1	1	8.7	5.5	12.1	256	0.3	0.4	0.4	0.01	33	143	4.8	0.0009	100	1.1842	0.87631	1.36775	37.409	7.82758	42.9096	7.31245	1.11315	5.71329	94.2867	1.24667	1.9903	469.4	0.774993	469.4	0.774993	192.52	41.0141	112.95	24.0626	111.54
K01/1/A	K1	K1/1	A	river current	limnocrene	river	2008	4	14	05.01. Agabus sp.	sb	2		2	1	8.7	5.5	12.1	256	0.3	0.4	0.4	0.01	33	143	4.8	0.0009	100	1.1842	0.87631	1.36775	37.409	7.82758	42.9096	7.31245	1.11315	5.71329	94.2867	1.24667	1.9903	469.4	0.774993	469.4	0.774993	192.52	41.0141	112.95	24.0626	111.54
K01/1/A	K1	K1/1	A	river current	limnocrene	river	2008	4	14	10.01. Anacaena limbata	sb	1		1	1	8.7	5.5	12.1	256	0.3	0.4	0.4	0.01	33	143	4.8	0.0009	100	1.1842	0.87631	1.36775	37.409	7.82758	42.9096	7.31245	1.11315	5.71329	94.2867	1.24667	1.9903	469.4	0.774993	469.4	0.774993	192.52	41.0141	112.95	24.0626	111.54
K01/1/A	K1	K1/1	A	river current	limnocrene	river	2008	4	14	10.06. Cymbiodyta marginella	sa		1	1	1	8.7	5.5	12.1	256	0.3	0.4	0.4	0.01	33	143	4.8	0.0009	100	1.1842	0.87631	1.36775	37.409	7.82758	42.9096	7.31245	1.11315	5.71329	94.2867	1.24667	1.9903	469.4	0.774993	469.4	0.774993	192.52	41.0141	112.95	24.0626	111.54
K01/1/A	K1	K1/1	A	river current	limnocrene	river	2008	4	14	10.07. Enochrus quadripunctatus	sb		1	1	1	8.7	5.5	12.1	256	0.3	0.4	0.4	0.01	33	143	4.8	0.0009	100	1.1842	0.87631	1.36775	37.409	7.82758	42.9096	7.31245	1.11315	5.71329	94.2867	1.24667	1.9903	469.4	0.774993	469.4	0.774993	192.52	41.0141	112.95	24.0626	111.54
K01/1/A	K1	K1/1	A	river current	limnocrene	river	2008	4	14	10.15. Cercyon tristis	sb		1	1	1	8.7	5.5	12.1	256	0.3	0.4	0.4	0.01	33	143	4.8	0.0009	100	1.1842	0.87631	1.36775	37.409	7.82758	42.9096	7.31245	1.11315	5.71329	94.2867	1.24667	1.9903	469.4	0.774993	469.4	0.774993	192.52	41.0141	112.95	24.0626	111.54
K01/1/A	K1	K1/1	A	river current	limnocrene	river	2008	4	14	10.15. Cercyon convexiusculus	sb		1	1	1	8.7	5.5	12.1	256	0.3	0.4	0.4	0.01	33	143	4.8	0.0009	100	1.1842	0.87631	1.36775	37.409	7.82758	42.9096	7.31245	1.11315	5.71329	94.2867	1.24667	1.9903	469.4	0.774993	469.4	0.774993	192.52	41.0141	112.95	24.0626	111.54
K01/1/A	K1	K1/1	A	river current	limnocrene	river	2008	4	14	06.01. Helophorus granularis	sa		1	1	1	8.7	5.5	12.1	256	0.3	0.4	0.4	0.01	33	143	4.8	0.0009	100	1.1842	0.87631	1.36775	37.409	7.82758	42.9096	7.31245	1.11315	5.71329	94.2867	1.24667	1.9903	469.4	0.774993	469.4	0.774993	192.52	41.0141	112.95	24.0626	111.54
K01/1/A	K1	K1/1	A	river current	limnocrene	river	2008	4	14	06.01. Helophorus strigifrons	sa		2	2	1	8.7	5.5	12.1	256	0.3	0.4	0.4	0.01	33	143	4.8	0.0009	100	1.1842	0.87631	1.36775	37.409	7.82758	42.9096	7.31245	1.11315	5.71329	94.2867	1.24667	1.9903	469.4	0.774993	469.4	0.774993	192.52	41.0141	112.95	24.0626	111.54
K01/9/C	K1	K1/9	C	river pocket water	river pocket water	river	2008	5	6	05.01. Agabus paludosus	re		1	1	0	4.2	7.6	16.1	123	2.7	0.4	0.1	0.01	6.8	69	4.7	0.0089	25.5814	20.7781	4.63851	3.43467	28.8104	8.95736	29.0893	2.23764	2.054	9.88161	90.1184	1.54667	1.33303	469.4	0.774993	469.4	0.774993	192.52	41.0141	112.95	24.0626	111.54
K01/1/B	K1	K1/1	B	river current	limnocrene	river	2008	5	6	05.05. Rhantus frontalis	sb		1	1	1	6	7.9	16.7	123	1.3	0.4	0.1	0.04	6	80	4.4	0.0009	100	1.1842	0.87631	1.36775	37.409	7.82758	42.9096	7.31245	1.11315	6.04905	93.951	1.24667	1.9903	469.4	0.774993	469.4	0.774993	192.52	41.0141	112.95	24.0626	111.54
K01/9/A	K1	K1/9	A	river pocket water	river pocket water	river	2008	4	14	14.01. Cyphon sp.	sb	3		3	0	11.2	6.7	7.7	261	0.3	0.5	1.4	0.02	33	143	4.7	0.0371	30	20.7781	4.63851	3.43467	28.8104	8.95736	29.0893	2.23764	2.054	9.88161	90.1184	0.0266667	0.93803	469.4	0.774993	469.4	0.774993	192.52	41.0141	112.95	24.0626	111.54
K01/1/C	K1	K1/1	C	river current	limnocrene	river	2008	9	10	03.01. Noterus clavicornis	sb		2	2	2	1.1	6.75	13.4	151.1	0.4	2.4	0.1	0.1	9.5	194	2.1	0.0173	100	1.1842	0.87631	1.36775	37.409	7.82758	42.9096	7.31245	1.11315	7.47773	92.5223	1.24667	1.9903	469.4	0.774993	469.4	0.774993	192.52	41.0141	112.95	24.0626	111.54
K01/1/C	K1	K1/1	C	river current	limnocrene	river	2008	9	10	10.13. Laccobius minutus	sa		1	1	2	1.1	6.75	13.4	151.1	0.4	2.4	0.1	0.1	9.5	194	2.1	0.0173	100	1.1842	0.87631	1.36775	37.409	7.82758	42.9096	7.31245	1.11315	7.47773	92.5223	1.24667	1.9903	469.4	0.774993	469.4	0.774993	192.52	41.0141	112.95	24.0626	111.54
K01/1/C	K1	K1/1	C	river current	limnocrene	river	2008	9	10	05.02. Ilybius sp.	sa	1		1	2	1.1	6.75	13.4	151.1	0.4	2.4	0.1	0.1	9.5	194	2.1	0.0173	100	1.1842	0.87631	1.36775	37.409	7.82758	42.9096	7.31245	1.11315	7.47773	92.5223	1.24667	1.9903	469.4	0.774993	469.4	0.774993	192.52	41.0141	112.95	24.0626	111.54
K01/5/B	K1	K1/5	B	river current	river current	river	2008	9	11	05.11. Hydaticus seminiger	sb		1	1	0	1.5	6.18	18.2	156.6	0.4	1.8	0.3	0.13	1.5	91	1.2	0.5938	100	0.411808	0.194336	0.286878	24.1764	15.3526	56.2558	2.35055	0.971682	6.59834	93.4017	2.12667	1.20303	469.4	0.774993	469.4	0.774993	192.52	41.0141	112.95	24.0626	111.54
K01/5/B	K1	K1/5	B	river current	river current	river	2008	9	11	05.01. Agabus undulatus	sb		2	2	0	1.5	6.18	18.2	156.6	0.4	1.8	0.3	0.13	1.5	91	1.2	0.5938	100	0.411808	0.194336	0.286878	24.1764	15.3526	56.2558	2.35055	0.971682	6.59834	93.4017	2.12667	1.20303	469.4	0.774993	469.4	0.774993	192.52	41.0141	112.95	24.0626	111.54
K01/5/B	K1	K1/5	B	river current	river current	river	2008	9	11	03.01. Noterus clavicornis	sb		1	1	0	1.5	6.18	18.2	156.6	0.4	1.8	0.3	0.13	1.5	91	1.2	0.5938	100	0.411808	0.194336	0.286878	24.1764	15.3526	56.2558	2.35055	0.971682	6.59834	93.4017	2.12667	1.20303	469.4	0.774993	469.4	0.774993	192.52	41.0141	112.95	24.0626	111.54
K01/5/B	K1	K1/5	B	river current	river current	river	2008	9	11	03.01. Noterus crassicornis	sb		5	5	0	1.5	6.18	18.2	156.6	0.4	1.8	0.3	0.13	1.5	91	1.2	0.5938	100	0.411808	0.194336	0.286878	24.1764	15.3526	56.2558	2.35055	0.971682	6.59834	93.4017	2.12667	1.20303	469.4	0.774993	469.4	0.774993	192.52	41.0141	112.95	24.0626	111.54
K01/5/B	K1	K1/5	B	river current	river current	river	2008	9	11	05.16. Hydroporus planus	sa		1	1	0	1.5	6.18	18.2	156.6	0.4	1.8	0.3	0.13	1.5	91	1.2	0.5938	100	0.411808	0.194336	0.286878	24.1764	15.3526	56.2558	2.35055	0.971682	6.59834	93.4017	2.12667	1.20303	469.4	0.774993	469.4	0.774993	192.52	41.0141	112.95	24.0626	111.54
K01/5/B	K1	K1/5	B	river current	river current	river	2008	9	11	05.16. Hydroporus incognitus	sa		1	1	0	1.5	6.18	18.2	156.6	0.4	1.8	0.3	0.13	1.5	91	1.2	0.5938	100	0.411808	0.194336	0.286878	24.1764	15.3526	56.2558	2.35055	0.971682	6.59834	93.4017	2.12667	1.20303	469.4	0.774993	469.4	0.774993	192.52	41.0141	112.95	24.0626	111.54
K01/5/B	K1	K1/5	B	river current	river current	river	2008	9	11	10.06. Cymbiodyta marginella	sa		2	2	0	1.5	6.18	18.2	156.6	0.4	1.8	0.3	0.13	1.5	91	1.2	0.5938	100	0.411808	0.194336	0.286878	24.1764	15.3526	56.2558	2.35055	0.971682	6.59834	93.4017	2.12667	1.20303	469.4	0.774993	469.4	0.774993	192.52	41.0141	112.95	24.0626	111.54
K01/5/B	K1	K1/5	B	river current	river current	river	2008	9	11	11.01. Limnebius aluta	sb		1	1	0	1.5	6.18	18.2	156.6	0.4	1.8	0.3	0.13	1.5	91	1.2	0.5938	100	0.411808	0.194336	0.286878	24.1764	15.3526	56.2558	2.35055	0.971682	6.59834	93.4017	2.12667	1.20303	469.4	0.774993	469.4	0.774993	192.52	41.0141	112.95	24.0626	111.54
K01/5/B	K1	K1/5	B	river current	river current	river	2008	9	11	11.01. Limnebius atomus	sb		2	2	0	1.5	6.18	18.2	156.6	0.4	1.8	0.3	0.13	1.5	91	1.2	0.5938	100	0.411808	0.194336	0.286878	24.1764	15.3526	56.2558	2.35055	0.971682	6.59834	93.4017	2.12667	1.20303	469.4	0.774993	469.4	0.774993	192.52	41.0141	112.95	24.0626	111.54
K01/5/B	K1	K1/5	B	river current	river current	river	2008	9	11	11.01. Limnebius parvulus	sb		5	5	0	1.5	6.18	18.2	156.6	0.4	1.8	0.3	0.13	1.5	91	1.2	0.5938	100	0.411808	0.194336	0.286878	24.1764	15.3526	56.2558	2.35055	0.971682	6.59834	93.4017	2.12667	1.20303	469.4	0.774993	469.4	0.774993	192.52	41.0141	112.95	24.0626	111.54
K01/5/B	K1	K1/5	B	river current	river current	river	2008	9	11	11.03. Ochthebius minimus	sb		1	1	0	1.5	6.18	18.2	156.6	0.4	1.8	0.3	0.13	1.5	91	1.2	0.5938	100	0.411808	0.194336	0.286878	24.1764	15.3526	56.2558	2.35055	0.971682	6.59834	93.4017	2.12667	1.20303	469.4	0.774993	469.4	0.774993	192.52	41.0141	112.95	24.0626	111.54
K01/5/B	K1	K1/5	B	river current	river current	river	2008	9	11	14.05. Priocyphon serriceus	sb	1		1	0	1.5	6.18	18.2	156.6	0.4	1.8	0.3	0.13	1.5	91	1.2	0.5938	100	0.411808	0.194336	0.286878	24.1764	15.3526	56.2558	2.35055	0.971682	6.59834	93.4017	2.12667	1.20303	469.4	0.774993	469.4	0.774993	192.52	41.0141	112.95	24.0626	111.54
K01/5/B	K1	K1/5	B	river current	river current	river	2008	9	11	10.14. Coelostoma orbiculare	sb		1	1	0	1.5	6.18	18.2	156.6	0.4	1.8	0.3	0.13	1.5	91	1.2	0.5938	100	0.411808	0.194336	0.286878	24.1764	15.3526	56.2558	2.35055	0.971682	6.59834	93.4017	2.12667	1.20303	469.4	0.774993	469.4	0.774993	192.52	41.0141	112.95	24.0626	111.54
K01/6/B	K1	K1/6	B	river pocket water	river pocket, meadow	river	2008	10	13	10.13. Laccobius minutus	sa		10	10	3	2.3	7.01	10.1	148.2	0.5	1.9	0.2	0	25	178	3.2	0.0082	109.444	0.296703	0.626994	0.839725	29.8942	9.59525	54.2742	3.16856	1.30437	8.9222	91.0778	1.24667	1.86303	469.4	0.774993	469.4	0.774993	192.52	41.0141	112.95	24.0626	111.54
K01/6/B	K1	K1/6	B	river pocket water	river pocket, meadow	river	2008	10	13	11.01. Hydraena riparia	rb		1	1	3	2.3	7.01	10.1	148.2	0.5	1.9	0.2	0	25	178	3.2	0.0082	109.444	0.296703	0.626994	0.839725	29.8942	9.59525	54.2742	3.16856	1.30437	8.9222	91.0778	1.24667	1.86303	469.4	0.774993	469.4	0.774993	192.52	41.0141	112.95	24.0626	111.54
K01/6/B	K1	K1/6	B	river pocket water	river pocket, meadow	river	2008	10	13	14.02. Elodes sp.	re		13	13	3	2.3	7.01	10.1	148.2	0.5	1.9	0.2	0	25	178	3.2	0.0082	109.444	0.296703	0.626994	0.839725	29.8942	9.59525	54.2742	3.16856	1.30437	8.9222	91.0778	1.24667	1.86303	469.4	0.774993	469.4	0.774993	192.52	41.0141	112.95	24.0626	111.54
K01/6/B	K1	K1/6	B	river pocket water	river pocket, meadow	river	2008	10	13	10.01. Anacaena lutescens	sa		2	2	3	2.3	7.01	10.1	148.2	0.5	1.9	0.2	0	25	178	3.2	0.0082	109.444	0.296703	0.626994	0.839725	29.8942	9.59525	54.2742	3.16856	1.30437	8.9222	91.0778	1.24667	1.86303	469.4	0.774993	469.4	0.774993	192.52	41.0141	112.95	24.0626	111.54
K01/6/B	K1	K1/6	B	river pocket water	river pocket, meadow	river	2008	10	13	11.01. Limnebius parvulus	sb		1	1	3	2.3	7.01	10.1	148.2	0.5	1.9	0.2	0	25	178	3.2	0.0082	109.444	0.296703	0.626994	0.839725	29.8942	9.59525	54.2742	3.16856	1.30437	8.9222	91.0778	1.24667	1.86303	469.4	0.774993	469.4	0.774993	192.52	41.0141	112.95	24.0626	111.54
K01/6/B	K1	K1/6	B	river pocket water	river pocket, meadow	river	2008	10	13	10.15. Cercyon tristis	sb		1	1	3	2.3	7.01	10.1	148.2	0.5	1.9	0.2	0	25	178	3.2	0.0082	109.444	0.296703	0.626994	0.839725	29.8942	9.59525	54.2742	3.16856	1.30437	8.9222	91.0778	1.24667	1.86303	469.4	0.774993	469.4	0.774993	192.52	41.0141	112.95	24.0626	111.54
K01/6/A	K1	K1/6	A	river pocket water	river pocket water	river	2008	9	10	05.01. Agabus bipustulatus	sb		2	2	3	1.5	6.18	18.2	156.6	0.4	1.8	0.3	0.13	1.5	91	1.2	0.0037	100	4.6174	2.26292	2.43296	29.3133	5.54611	40.1046	11.6808	4.04186	6.39609	93.6039	1.24667	2.09333	469.4	0.774993	469.4	0.774993	192.52	41.0141	112.95	24.0626	111.54
K01/6/A	K1	K1/6	A	river pocket water	river pocket water	river	2008	9	10	05.01. Agabus sturmii	sb		3	3	3	1.5	6.18	18.2	156.6	0.4	1.8	0.3	0.13	1.5	91	1.2	0.0037	100	4.6174	2.26292	2.43296	29.3133	5.54611	40.1046	11.6808	4.04186	6.39609	93.6039	1.24667	2.09333	469.4	0.774993	469.4	0.774993	192.52	41.0141	112.95	24.0626	111.54
K01/6/A	K1	K1/6	A	river pocket water	river pocket water	river	2008	9	10	05.02. Ilybius fuliginosus	re		1	1	3	1.5	6.18	18.2	156.6	0.4	1.8	0.3	0.13	1.5	91	1.2	0.0037	100	4.6174	2.26292	2.43296	29.3133	5.54611	40.1046	11.6808	4.04186	6.39609	93.6039	1.24667	2.09333	469.4	0.774993	469.4	0.774993	192.52	41.0141	112.95	24.0626	111.54
K01/6/A	K1	K1/6	A	river pocket water	river pocket water	river	2008	9	10	05.27. Laccophilus minutus	sb		2	2	3	1.5	6.18	18.2	156.6	0.4	1.8	0.3	0.13	1.5	91	1.2	0.0037	100	4.6174	2.26292	2.43296	29.3133	5.54611	40.1046	11.6808	4.04186	6.39609	93.6039	1.24667	2.09333	469.4	0.774993	469.4	0.774993	192.52	41.0141	112.95	24.0626	111.54
K01/6/A	K1	K1/6	A	river pocket water	river pocket water	river	2008	9	10	03.01. Noterus crassicornis	sb		1	1	3	1.5	6.18	18.2	156.6	0.4	1.8	0.3	0.13	1.5	91	1.2	0.0037	100	4.6174	2.26292	2.43296	29.3133	5.54611	40.1046	11.6808	4.04186	6.39609	93.6039	1.24667	2.09333	469.4	0.774993	469.4	0.774993	192.52	41.0141	112.95	24.0626	111.54
K01/6/A	K1	K1/6	A	river pocket water	river pocket water	river	2008	9	10	10.01. Anacaena limbata	sb		2	2	3	1.5	6.18	18.2	156.6	0.4	1.8	0.3	0.13	1.5	91	1.2	0.0037	100	4.6174	2.26292	2.43296	29.3133	5.54611	40.1046	11.6808	4.04186	6.39609	93.6039	1.24667	2.09333	469.4	0.774993	469.4	0.774993	192.52	41.0141	112.95	24.0626	111.54
K01/6/A	K1	K1/6	A	river pocket water	river pocket water	river	2008	9	10	10.01. Anacaena globulus	sb		1	1	3	1.5	6.18	18.2	156.6	0.4	1.8	0.3	0.13	1.5	91	1.2	0.0037	100	4.6174	2.26292	2.43296	29.3133	5.54611	40.1046	11.6808	4.04186	6.39609	93.6039	1.24667	2.09333	469.4	0.774993	469.4	0.774993	192.52	41.0141	112.95	24.0626	111.54
K01/6/A	K1	K1/6	A	river pocket water	river pocket water	river	2008	9	10	05.16. Hydroporus angustatus	sa		4	4	3	1.5	6.18	18.2	156.6	0.4	1.8	0.3	0.13	1.5	91	1.2	0.0037	100	4.6174	2.26292	2.43296	29.3133	5.54611	40.1046	11.6808	4.04186	6.39609	93.6039	1.24667	2.09333	469.4	0.774993	469.4	0.774993	192.52	41.0141	112.95	24.0626	111.54
K01/6/A	K1	K1/6	A	river pocket water	river pocket water	river	2008	9	10	05.16. Hydroporus palustris	sb		2	2	3	1.5	6.18	18.2	156.6	0.4	1.8	0.3	0.13	1.5	91	1.2	0.0037	100	4.6174	2.26292	2.43296	29.3133	5.54611	40.1046	11.6808	4.04186	6.39609	93.6039	1.24667	2.09333	469.4	0.774993	469.4	0.774993	192.52	41.0141	112.95	24.0626	111.54
K01/2/A	K1	K1/2	A	river pocket water	small limnocrene	wody stojące	2008	5	6	05.04. Colymbetes striatus	sa	4		4	2	6	7.9	16.7	123	1.3	0.4	0.1	0.04	6	80	4.4	0.0009	100	1.1842	0.87631	1.36775	37.409	7.82758	42.9096	7.31245	1.11315	6.04905	93.951	1.24667	1.9903	469.4	0.774993	469.4	0.774993	192.52	41.0141	112.95	24.0626	111.54
K01/2/A	K1	K1/2	A	river pocket water	small limnocrene	wody stojące	2008	5	6	10.06. Cymbiodyta marginella	sa	1		1	2	6	7.9	16.7	123	1.3	0.4	0.1	0.04	6	80	4.4	0.0009	100	1.1842	0.87631	1.36775	37.409	7.82758	42.9096	7.31245	1.11315	6.04905	93.951	1.24667	1.9903	469.4	0.774993	469.4	0.774993	192.52	41.0141	112.95	24.0626	111.54
K01/2/A	K1	K1/2	A	river pocket water	small limnocrene	wody stojące	2008	5	6	10.01. Anacaena lutescens	sa	4		4	2	6	7.9	16.7	123	1.3	0.4	0.1	0.04	6	80	4.4	0.0009	100	1.1842	0.87631	1.36775	37.409	7.82758	42.9096	7.31245	1.11315	6.04905	93.951	1.24667	1.9903	469.4	0.774993	469.4	0.774993	192.52	41.0141	112.95	24.0626	111.54
K01/2/A	K1	K1/2	A	river pocket water	small limnocrene	wody stojące	2008	5	6	10.01. Anacaena limbata	sb	1		1	2	6	7.9	16.7	123	1.3	0.4	0.1	0.04	6	80	4.4	0.0009	100	1.1842	0.87631	1.36775	37.409	7.82758	42.9096	7.31245	1.11315	6.04905	93.951	1.24667	1.9903	469.4	0.774993	469.4	0.774993	192.52	41.0141	112.95	24.0626	111.54
K01/2/A	K1	K1/2	A	river pocket water	small limnocrene	wody stojące	2008	5	6	10.08. Helochares obscurus	sb	1		1	2	6	7.9	16.7	123	1.3	0.4	0.1	0.04	6	80	4.4	0.0009	100	1.1842	0.87631	1.36775	37.409	7.82758	42.9096	7.31245	1.11315	6.04905	93.951	1.24667	1.9903	469.4	0.774993	469.4	0.774993	192.52	41.0141	112.95	24.0626	111.54
K01/2/A	K1	K1/2	A	river pocket water	small limnocrene	wody stojące	2008	5	6	06.01. Helophorus nanus	sa	1		1	2	6	7.9	16.7	123	1.3	0.4	0.1	0.04	6	80	4.4	0.0009	100	1.1842	0.87631	1.36775	37.409	7.82758	42.9096	7.31245	1.11315	6.04905	93.951	1.24667	1.9903	469.4	0.774993	469.4	0.774993	192.52	41.0141	112.95	24.0626	111.54
K01/2/A	K1	K1/2	A	river pocket water	small limnocrene	wody stojące	2008	5	6	06.01. Helophorus flavipes	sa		3	3	2	6	7.9	16.7	123	1.3	0.4	0.1	0.04	6	80	4.4	0.0009	100	1.1842	0.87631	1.36775	37.409	7.82758	42.9096	7.31245	1.11315	6.04905	93.951	1.24667	1.9903	469.4	0.774993	469.4	0.774993	192.52	41.0141	112.95	24.0626	111.54
K01/1C	K1	K1/1	C	river current	limnocrene	river	2008	7	7	05.01. Agabus bipustulatus	sb		6	6	2	8.3	7.26	16.4	166	0.8	1.3	0.8	0.36	38.7	109	2.8	0.0008	100	1.1842	0.87631	1.36775	37.409	7.82758	42.9096	7.31245	1.11315	13.5821	86.4179	1.24667	1.86303	469.4	0.774993	469.4	0.774993	192.52	41.0141	112.95	24.0626	111.54
K01/1C	K1	K1/1	C	river current	limnocrene	river	2008	7	7	10.09. Hydrobius fuscipes	sb		1	1	2	8.3	7.26	16.4	166	0.8	1.3	0.8	0.36	38.7	109	2.8	0.0008	100	1.1842	0.87631	1.36775	37.409	7.82758	42.9096	7.31245	1.11315	13.5821	86.4179	1.24667	1.86303	469.4	0.774993	469.4	0.774993	192.52	41.0141	112.95	24.0626	111.54
K09/2/B	K9	K9/2	B	river pocket water	river pocket, Glyceria	river	2008	10	14	05.10. Dytiscus dimidiatus	sb		3	3	5	2.2	6.89	11.2	190.1	0.4	2.3	0.1	0	1.5	223	1.5	0.0031	100	72.0328	4.80514	3.76439	13.0868	1.28432	3.83082	0.819309	0.376439	28.5327	71.4673	-0.44	-0.0663636	39624.8	65.4217	18461.4	30.4803	5740.96	31.0971	5532.02	29.9653	6152.93
K09/2/B	K9	K9/2	B	river pocket water	river pocket, Glyceria	river	2008	10	14	10.12. Hydrophilus caraboides	sb		1	1	5	2.2	6.89	11.2	190.1	0.4	2.3	0.1	0	1.5	223	1.5	0.0031	100	72.0328	4.80514	3.76439	13.0868	1.28432	3.83082	0.819309	0.376439	28.5327	71.4673	-0.44	-0.0663636	39624.8	65.4217	18461.4	30.4803	5740.96	31.0971	5532.02	29.9653	6152.93
K09/2/B	K9	K9/2	B	river pocket water	river pocket, Glyceria	river	2008	10	14	05.11. Hydaticus transversalis	sb		7	7	5	2.2	6.89	11.2	190.1	0.4	2.3	0.1	0	1.5	223	1.5	0.0031	100	72.0328	4.80514	3.76439	13.0868	1.28432	3.83082	0.819309	0.376439	28.5327	71.4673	-0.44	-0.0663636	39624.8	65.4217	18461.4	30.4803	5740.96	31.0971	5532.02	29.9653	6152.93
K09/2/B	K9	K9/2	B	river pocket water	river pocket, Glyceria	river	2008	10	14	05.11. Hydaticus seminiger	sb		2	2	5	2.2	6.89	11.2	190.1	0.4	2.3	0.1	0	1.5	223	1.5	0.0031	100	72.0328	4.80514	3.76439	13.0868	1.28432	3.83082	0.819309	0.376439	28.5327	71.4673	-0.44	-0.0663636	39624.8	65.4217	18461.4	30.4803	5740.96	31.0971	5532.02	29.9653	6152.93
K09/2/B	K9	K9/2	B	river pocket water	river pocket, Glyceria	river	2008	10	14	05.05. Rhantus exoletus	sb		5	5	5	2.2	6.89	11.2	190.1	0.4	2.3	0.1	0	1.5	223	1.5	0.0031	100	72.0328	4.80514	3.76439	13.0868	1.28432	3.83082	0.819309	0.376439	28.5327	71.4673	-0.44	-0.0663636	39624.8	65.4217	18461.4	30.4803	5740.96	31.0971	5532.02	29.9653	6152.93
K09/2/B	K9	K9/2	B	river pocket water	river pocket, Glyceria	river	2008	10	14	05.02. Ilybius obscurus	sa		1	1	5	2.2	6.89	11.2	190.1	0.4	2.3	0.1	0	1.5	223	1.5	0.0031	100	72.0328	4.80514	3.76439	13.0868	1.28432	3.83082	0.819309	0.376439	28.5327	71.4673	-0.44	-0.0663636	39624.8	65.4217	18461.4	30.4803	5740.96	31.0971	5532.02	29.9653	6152.93
K09/2/B	K9	K9/2	B	river pocket water	river pocket, Glyceria	river	2008	10	14	05.25. Hyphydrus ovatus	sb		1	1	5	2.2	6.89	11.2	190.1	0.4	2.3	0.1	0	1.5	223	1.5	0.0031	100	72.0328	4.80514	3.76439	13.0868	1.28432	3.83082	0.819309	0.376439	28.5327	71.4673	-0.44	-0.0663636	39624.8	65.4217	18461.4	30.4803	5740.96	31.0971	5532.02	29.9653	6152.93
K09/2/B	K9	K9/2	B	river pocket water	river pocket, Glyceria	river	2008	10	14	03.01. Noterus clavicornis	sb		1	1	5	2.2	6.89	11.2	190.1	0.4	2.3	0.1	0	1.5	223	1.5	0.0031	100	72.0328	4.80514	3.76439	13.0868	1.28432	3.83082	0.819309	0.376439	28.5327	71.4673	-0.44	-0.0663636	39624.8	65.4217	18461.4	30.4803	5740.96	31.0971	5532.02	29.9653	6152.93
K01/1/C	K1	K1/1	C	river current	limnocrene	river	2008	5	6	05.10. Dytiscus marginalis	sb		1	1	1	6	7.9	16.7	123	1.3	0.4	0.1	0.04	6	80	4.4	0.0009	100	1.1842	0.87631	1.36775	37.409	7.82758	42.9096	7.31245	1.11315	6.04905	93.951	1.24667	1.9903	469.4	0.774993	469.4	0.774993	192.52	41.0141	112.95	24.0626	111.54
K11/4/A	K11	K11/4	A	river current	river current, plants	river	2008	4	17	05.16. Hydroporus nigrita	sa	-	2	2	1	5.3	7.85	17.7	213	0.3	7.5	0.3	0.2	21.9	155	4.5	0.3489	48	0.146706	0.0666844	0.0233396	7.54535	11.8832	74.6366	4.73793	0.960256	0.64197	99.358	2.26667	0.69803	57566.7	95.0443	12190.8	20.1274	3079.45	25.2604	2793.14	22.9119	5859.79
K11/4/B	K11	K11/4	B	river current	river current, plants	river	2008	4	17	10.11. Hydrochara caraboides	sb	-	3	3	1	5.3	7.85	17.7	213	0.3	7.5	0.3	0.2	21.9	155	4.5	0.3489	48	0.146706	0.0666844	0.0233396	7.54535	11.8832	74.6366	4.73793	0.960256	0.64197	99.358	2.26667	0.69803	57566.7	95.0443	12190.8	20.1274	3079.45	25.2604	2793.14	22.9119	5859.79
K11/4/C	K11	K11/4	C	river current	river current, plants	river	2008	4	17	10.09. Hydrobius fuscipes	sb	-	1	1	1	5.3	7.85	17.7	213	0.3	7.5	0.3	0.2	21.9	155	4.5	0.3489	48	0.146706	0.0666844	0.0233396	7.54535	11.8832	74.6366	4.73793	0.960256	0.64197	99.358	2.26667	0.69803	57566.7	95.0443	12190.8	20.1274	3079.45	25.2604	2793.14	22.9119	5859.79
K09/1	K9	K9/3	C	river current	trap	river	2008	10	24	05.10. Dytiscus dimidiatus	sb	0	6	6	5	2.2	6.89	11.2	190.1	0.4	2.3	0.1	0	1.5	223	1.5	0.0031	100	72.0328	4.80514	3.76439	13.0868	1.28432	3.83082	0.819309	0.376439	28.5327	71.4673	-0.44	-0.0663636	39624.8	65.4217	18461.4	30.4803	5740.96	31.0971	5532.02	29.9653	6152.93
K09/1	K9	K9/3	C	river current	trap	river	2008	10	24	05.04. Colymbetes fuscus	sb	0	40	40	5	2.2	6.89	11.2	190.1	0.4	2.3	0.1	0	1.5	223	1.5	0.0031	100	72.0328	4.80514	3.76439	13.0868	1.28432	3.83082	0.819309	0.376439	28.5327	71.4673	-0.44	-0.0663636	39624.8	65.4217	18461.4	30.4803	5740.96	31.0971	5532.02	29.9653	6152.93
K09/1	K9	K9/3	C	river current	trap	river	2008	10	24	05.09. Cybister laterimarginalis	sb	0	1	1	5	2.2	6.89	11.2	190.1	0.4	2.3	0.1	0	1.5	223	1.5	0.0031	100	72.0328	4.80514	3.76439	13.0868	1.28432	3.83082	0.819309	0.376439	28.5327	71.4673	-0.44	-0.0663636	39624.8	65.4217	18461.4	30.4803	5740.96	31.0971	5532.02	29.9653	6152.93
K09/1	K9	K9/3	C	river current	trap	river	2008	10	24	05.07. Acilius sulcatus	sb	0	1	1	5	2.2	6.89	11.2	190.1	0.4	2.3	0.1	0	1.5	223	1.5	0.0031	100	72.0328	4.80514	3.76439	13.0868	1.28432	3.83082	0.819309	0.376439	28.5327	71.4673	-0.44	-0.0663636	39624.8	65.4217	18461.4	30.4803	5740.96	31.0971	5532.02	29.9653	6152.93
K09/1	K9	K9/3	C	river current	trap	river	2008	10	24	05.07. Acilius canaliculatus	sa	0	1	1	5	2.2	6.89	11.2	190.1	0.4	2.3	0.1	0	1.5	223	1.5	0.0031	100	72.0328	4.80514	3.76439	13.0868	1.28432	3.83082	0.819309	0.376439	28.5327	71.4673	-0.44	-0.0663636	39624.8	65.4217	18461.4	30.4803	5740.96	31.0971	5532.02	29.9653	6152.93
K09/1	K9	K9/3	C	river current	trap	river	2008	10	24	05.04. Colymbetes paykulli	sa	0	2	2	5	2.2	6.89	11.2	190.1	0.4	2.3	0.1	0	1.5	223	1.5	0.0031	100	72.0328	4.80514	3.76439	13.0868	1.28432	3.83082	0.819309	0.376439	28.5327	71.4673	-0.44	-0.0663636	39624.8	65.4217	18461.4	30.4803	5740.96	31.0971	5532.02	29.9653	6152.93
K09/1	K9	K9/3	C	river current	trap	river	2008	10	24	05.10. Dytiscus marginalis	sb	0	1	1	5	2.2	6.89	11.2	190.1	0.4	2.3	0.1	0	1.5	223	1.5	0.0031	100	72.0328	4.80514	3.76439	13.0868	1.28432	3.83082	0.819309	0.376439	28.5327	71.4673	-0.44	-0.0663636	39624.8	65.4217	18461.4	30.4803	5740.96	31.0971	5532.02	29.9653	6152.93
K09/1	K9	K9/3	C	river current	trap	river	2008	10	24	05.04. Colymbetes striatus	sa	0	4	4	5	2.2	6.89	11.2	190.1	0.4	2.3	0.1	0	1.5	223	1.5	0.0031	100	72.0328	4.80514	3.76439	13.0868	1.28432	3.83082	0.819309	0.376439	28.5327	71.4673	-0.44	-0.0663636	39624.8	65.4217	18461.4	30.4803	5740.96	31.0971	5532.02	29.9653	6152.93
K09/1	K9	K9/3	C	river current	trap	river	2008	10	24	05.05. Rhanthus pulverosus	sb	0	1	1	5	2.2	6.89	11.2	190.1	0.4	2.3	0.1	0	1.5	223	1.5	0.0031	100	72.0328	4.80514	3.76439	13.0868	1.28432	3.83082	0.819309	0.376439	28.5327	71.4673	-0.44	-0.0663636	39624.8	65.4217	18461.4	30.4803	5740.96	31.0971	5532.02	29.9653	6152.93
K09/1	K9	K9/3	C	river current	trap	river	2008	10	24	05.01. Agabus bipustulatus	sb	0	2	2	5	2.2	6.89	11.2	190.1	0.4	2.3	0.1	0	1.5	223	1.5	0.0031	100	72.0328	4.80514	3.76439	13.0868	1.28432	3.83082	0.819309	0.376439	28.5327	71.4673	-0.44	-0.0663636	39624.8	65.4217	18461.4	30.4803	5740.96	31.0971	5532.02	29.9653	6152.93
[truncated: 479 more columns]
